# Supplementary material for: Terroir Dynamics: Impact of Vineyard and Canopy Treatment with Chitosan on Anthocyanins, Phenolics, and Volatile and Sensory Profiles of Pinot Noir Wines from South Tyrol
Source: MDPI journal article supplement (doi:10.3390/molecules29091916), 2024-04-23
Supplement: s1 [file s1]

## SUPPORTING INFORMATION

**Table S1** represents the volatile compounds identified in wines and listed according to their elution order.  
LRI = Linear retention index

| Code | Volatile compounds                                                                            | LRI<br>(Ref./NIST) | Base<br>peak<br>(m/z) | fragmentation<br>pattern (m/z) |
|------|-----------------------------------------------------------------------------------------------|--------------------|-----------------------|--------------------------------|
| x.1  | Acetaldehyde                                                                                  | 692 [21]           | 29                    | 29; 43; 44                     |
| x.2  | Ethyl Acetate                                                                                 | 891 [21]           | 43                    | 43; 45; 61; 70                 |
| x.3  | n-propyl acetate                                                                              | 969 [22]           | 43                    | 43; 61; 73                     |
| x.4  | 1-propanol                                                                                    | 1040 [23]          | 31                    | 31; 42; 59                     |
| x.5  | 1-butanol, 3-methyl, acetate                                                                  | 1124 [24]          | 43                    | 43; 55; 70; 87                 |
| x.6  | 1-propanol, 2-methyl-                                                                         | 1092 [24]          | 43                    | 39; 41; 42; 43; 74             |
| x.7  | 1-butanol, 3-methyl-                                                                          | 1209 [24]          | 55                    | 41; 42; 43; 55; 70             |
| x.8  | 1-pentanol, 3-methyl-                                                                         | 1331 [21]          | 56                    | 41; 43; 55; 56; 69             |
| x.9  | Propanoic acid, 2-hydroxy-, ethyl ester                                                       | 1341 [25]          | 45                    | 29; 45; 75                     |
| x.10 | 2H-pyran-2-one, tetrahydro-3,6-dimethyl-                                                      | /                  | /                     | /                              |
| x.11 | 1-hexanol                                                                                     | 1356 [24]          | 56                    | 41; 42; 43; 55; 56; 69         |
| x.12 | 2-nonenal                                                                                     | 1537 [26]          | 41; 43                | 41; 43; 55; 70; 83             |
| x.13 | Octanoic acid, ethyl ester                                                                    | 1444 [21]          | 88                    | 75; 60; 73; 88; 101; 127       |
| x.14 | Furfural                                                                                      | 1466 [24]          | 96                    | 38; 39; 95; 96                 |
| x.15 | Benzaldehyde                                                                                  | 1527 [24]          | 77                    | 51; 77; 105; 106               |
| x.16 | 2(1H)-naphthalenone,3,4,4a,5,6,7-hexahydro-1,1,4a-trimethyl-                                  | /                  | /                     | /                              |
| x.17 | 1-octanol                                                                                     | 1564 [24]          | 56                    | 41; 43; 55; 56; 69; 70; 84     |
| x.18 | 2-furancarboxaldehyde, 5-methyl-                                                              | 1597 [21]          | 53                    | 53; 109; 110                   |
| x.19 | D,L-2,3-butanediol                                                                            | 1620 [27]          | 45                    | 41; 43; 44; 45; 55; 57         |
| x.20 | Bicyclo[3.1.0]hexan-2-ol, 2-methyl-5-(1-methylethyl)-, (1 $\alpha$ ,2 $\alpha$ ,5 $\alpha$ )- | 1459 [22]          | 93                    | 43; 71; 91; 93; 121; 136       |
| x.21 | Butyrolactone                                                                                 | 1640 [28]          | 42                    | 41; 42; 56; 86                 |
| x.22 | Decanoic acid, ethyl ester                                                                    | 1648 [21]          | 88                    | 73; 88; 101                    |
| x.23 | 2-furanmethanol                                                                               | 1665 [28]          | 98                    | 41; 53; 81; 98                 |
| x.24 | Butanedioic acid, diethyl ester                                                               | 1687 [21]          | 101                   | 55; 73; 101; 129               |
| x.25 | 4-decenoic acid, ethyl ester, (Z)-                                                            | /                  | 29                    | 29; 41; 55; 69; 88; 110        |
| x.26 | $\alpha$ -terpineol                                                                           | 1695 [24]          | 59                    | 59; 93; 121; 136               |
| x.27 | 1-Propanol, 3-(methylthio)-                                                                   | 1708 [22]          | 106                   | 49; 57; 58; 61; 106            |
| x.28 | Naphthalene,1,2,3,5,6,8a-hexahydro-4,7-dimethyl-1-(1-methylethyl)-, (1S-cis)-                 | 1758 [29]          | 161                   | 105; 119; 134; 161             |
| x.29 | Citronellol                                                                                   | 1754 [30]          | 69                    | 41; 55; 67; 69; 81; 95         |
| x.30 | Benzeneacetic acid, ethyl ester                                                               | 1776 [31]          | 91                    | 39; 65; 91; 164                |
| x.31 | Acetic acid, 2-phenylethyl ester                                                              | 1822 [24]          | 104                   | 43; 91; 104                    |
| x.32 | Anethole                                                                                      | 1834 [32]          | 148                   | 77; 105; 117; 147; 148         |
| x.33 | Benzyl alcohol                                                                                | 1885 [24]          | 79                    | 51; 77; 79; 107; 108           |
| x.34 | trans-3-methyl-4-octanolide (trans-whisky lactone)                                            | /                  | 99                    | 41; 42; 43; 69; 71; 99         |

|      |                                                              |           |     |                         |
|------|--------------------------------------------------------------|-----------|-----|-------------------------|
| x.35 | $\alpha$ -calacorene                                         | 1911 [33] | /   | /                       |
| x.36 | Butanedioic acid, ethyl 3-methylbutyl ester                  | 1892 [34] | /   | /                       |
| x.37 | 1,6-heptadien-3-yne                                          | /         | 91  | 63; 65; 91; 92          |
| x.38 | Phenylethyl alcohol                                          | 1919 [24] | 91  | 65; 91; 92; 122         |
| x.39 | 2(3H)-Furanone, 5-butyldihydro-4-methyl-, cis-whisky lactone | /         | /   | /                       |
| x.40 | Nerolidol                                                    | 1992 [35] | 69  | 41; 43; 69; 71; 93; 107 |
| x.41 | Phenol, 4-ethyl-                                             | 2210 [21] | 107 | 77; 107; 122            |
| x.42 | Naphthalene, 1,6-dimethyl-4-(1-methylethyl)-                 | 2242 [36] | 183 | 153; 168; 183; 198      |
| x.43 | Methyl anthranilate                                          | 2257 [37] | 119 | 65; 92; 119; 120; 151   |
| x.44 | Hexadecanoic acid, ethyl ester                               | 2288 [21] | 88  | 41; 43; 55; 57; 88; 101 |
| x.45 | 2,4-di-tert-butylphenol                                      | 2321 [36] | 191 | 57; 191; 206            |

---

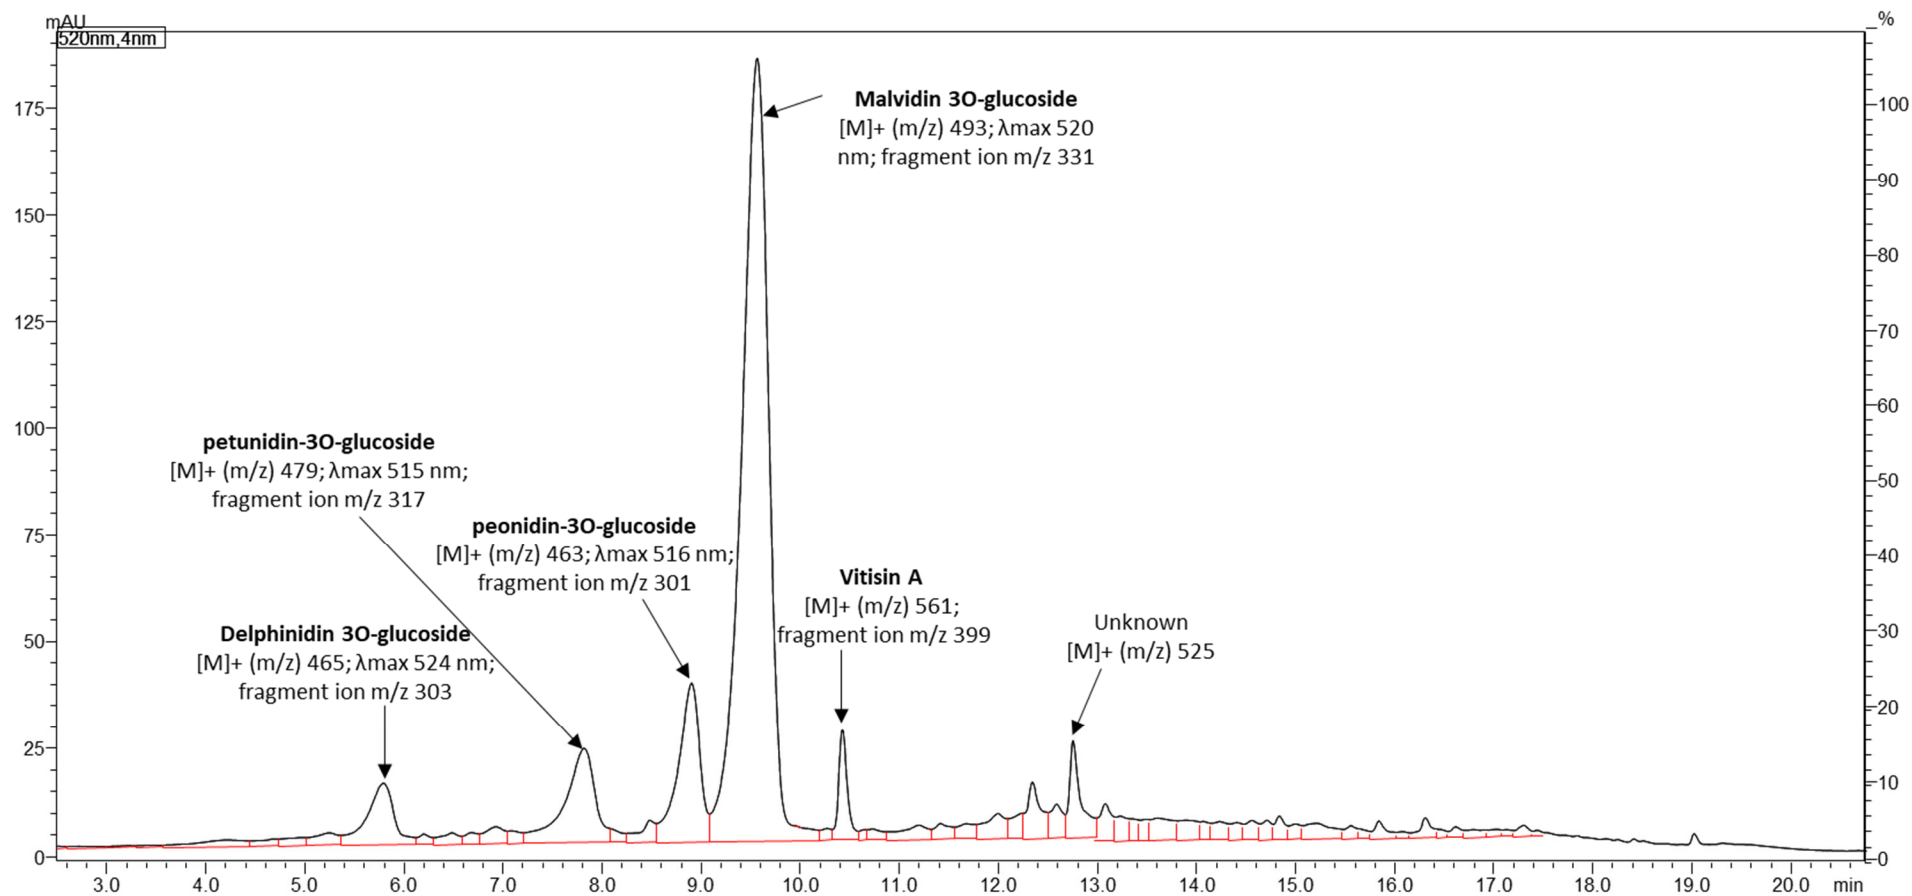

**Figure S1:** Target identification of anthocyanins in Pinot Noir based on molecular ion [M-H] – (m/z) and lambda max (UV spectrum absorbance)

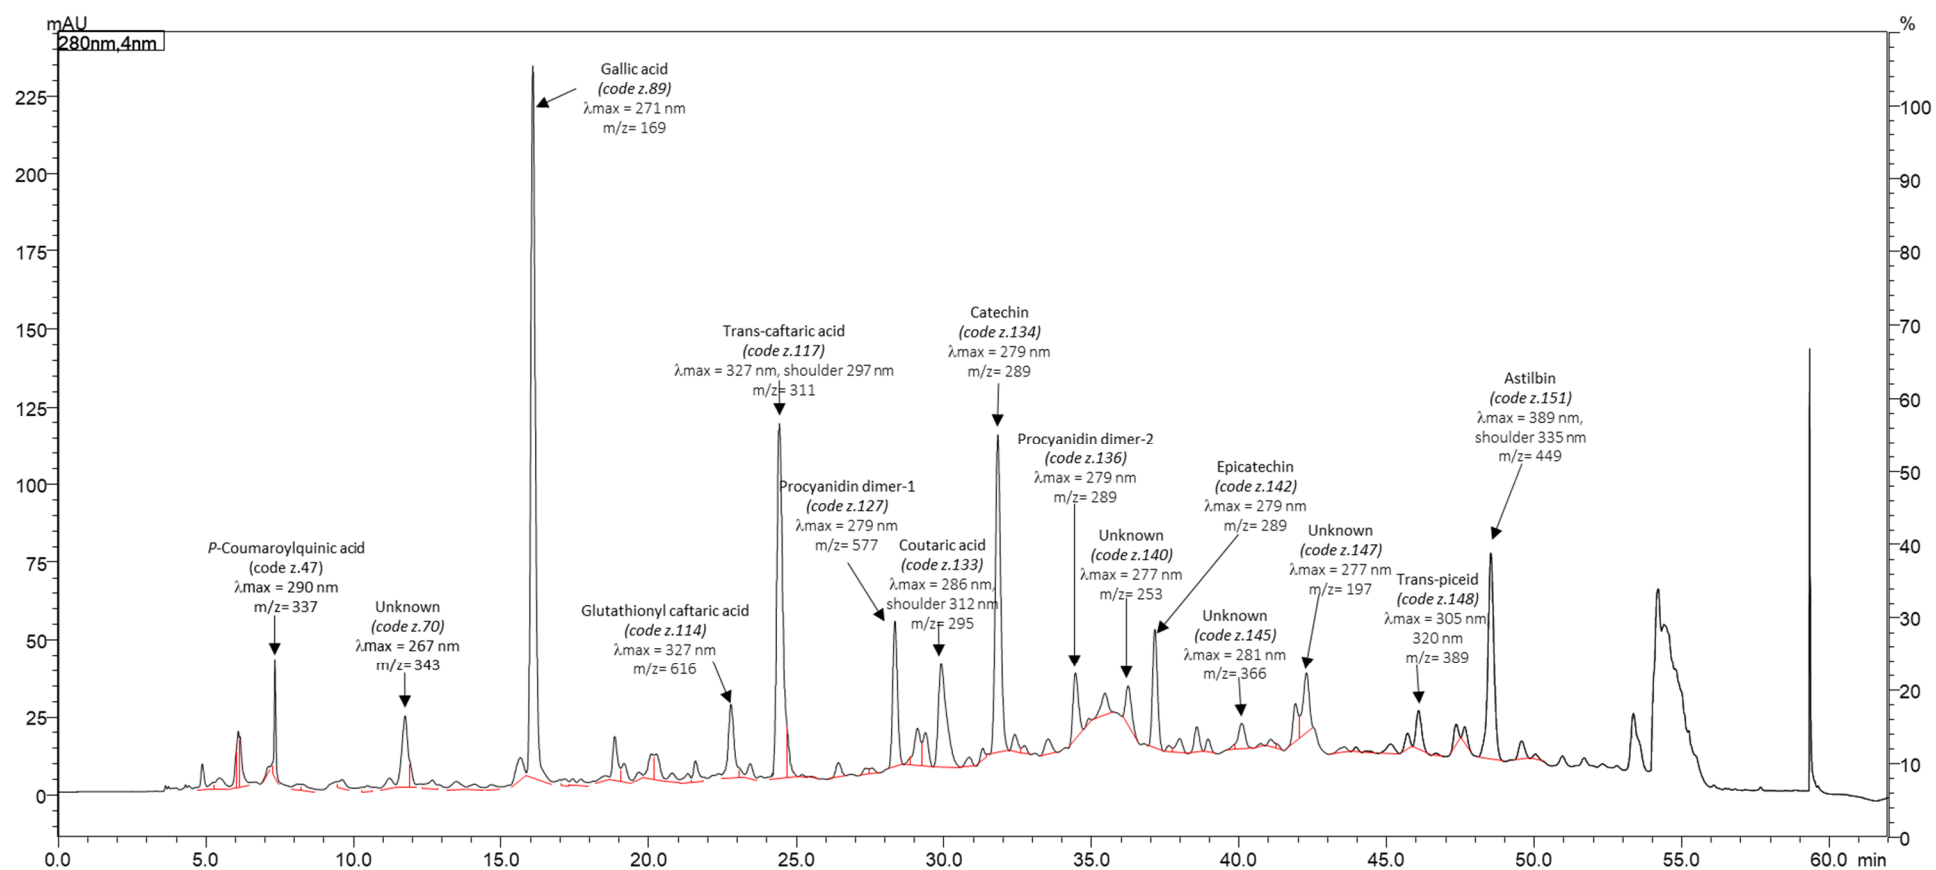

Figure S2: Tentative compounds identification by off-line LC-DAD-QqQ-MS with their respective code used in the present study.

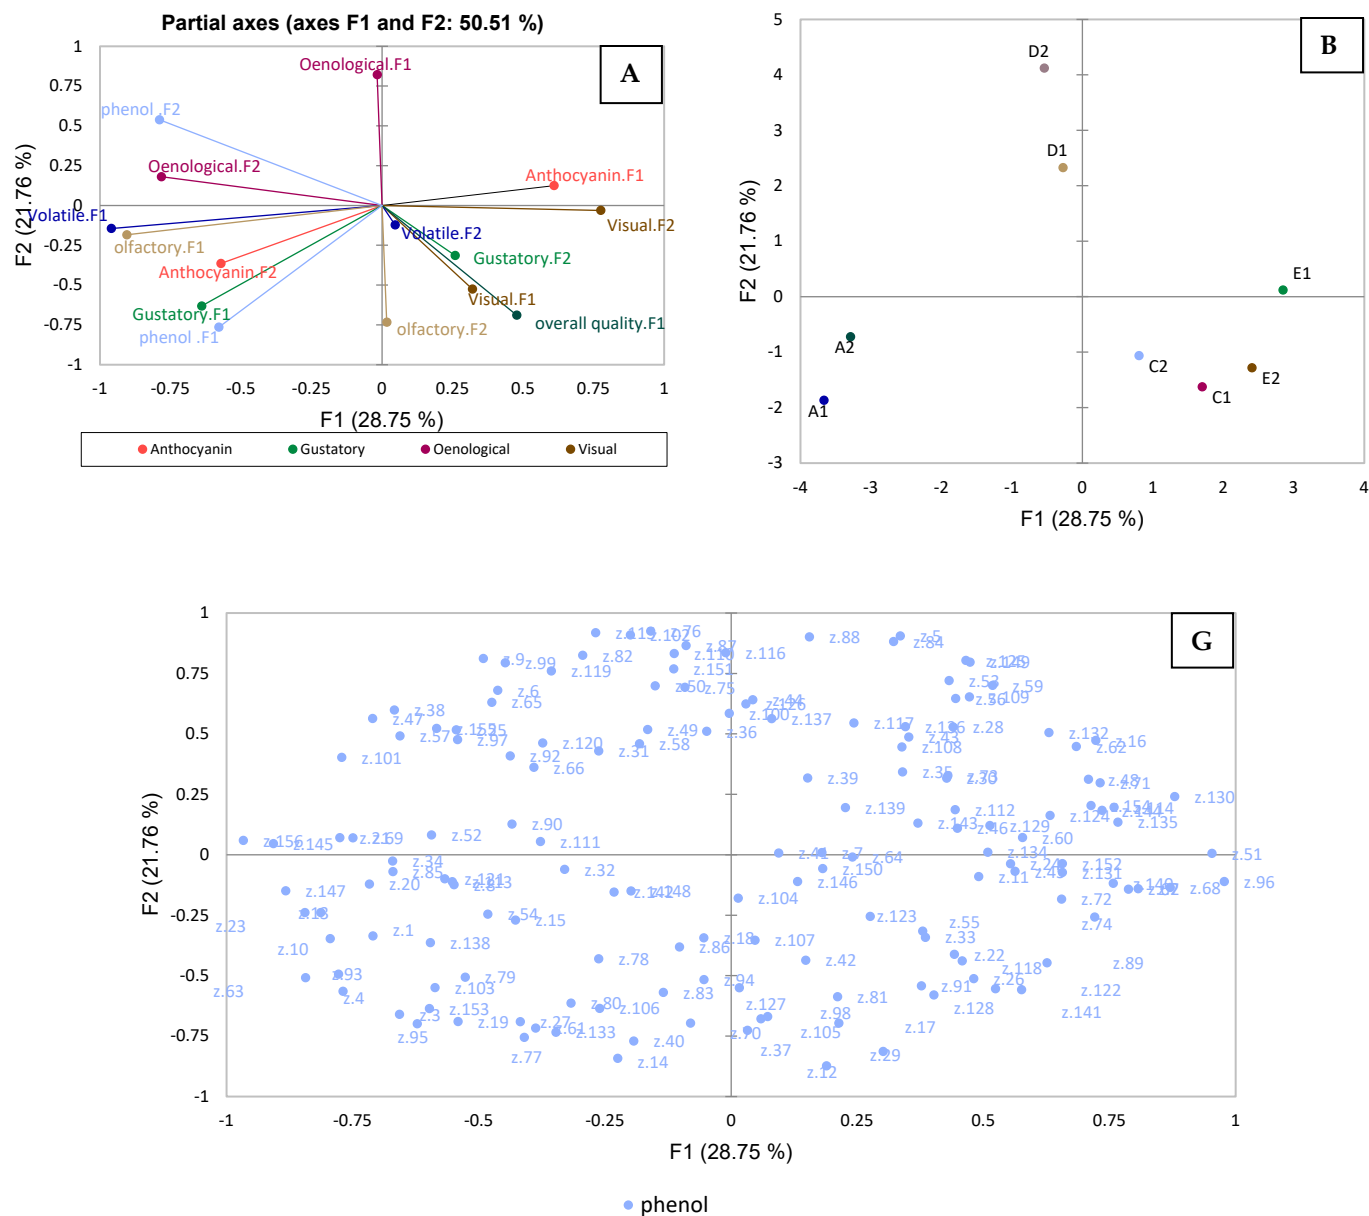

**Figure S3** represents the MFA of wines from the four different vineyards. (A) shows the projection of the Principal Components of the different datasets applied on the first two MFA partial axes, (B) represents the observation plot, and (G) shows non-volatile phenolic compounds. Identified phenolic compounds are presented in Figure S2. In Figure S3-B the symbol (A) means Mazzon vineyard, (C) Aldino vineyard, (D) Patone vineyard, and (E) Eggerhof vineyard.

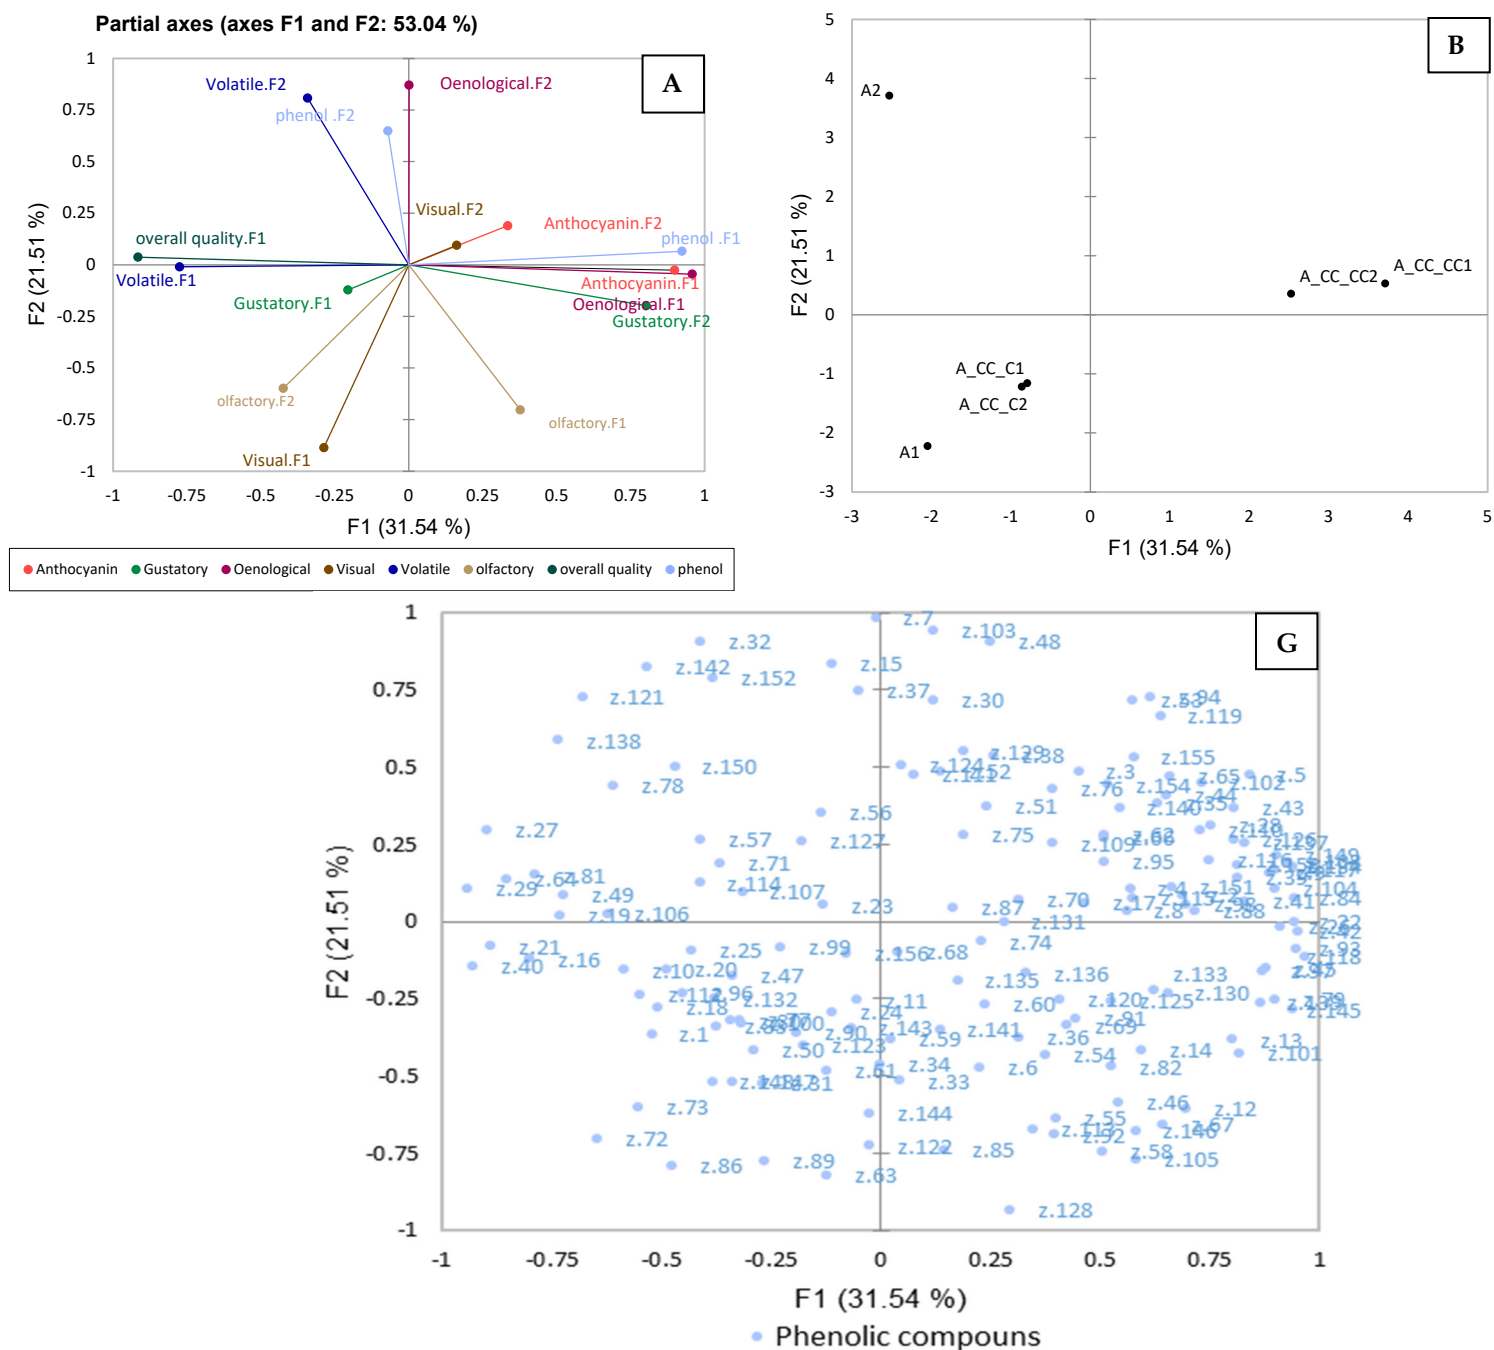

**Figure S4** shows the MFA of wines from Mazzon vineyard evaluating the effect of chitosan treatment on canopy. (A) shows the projection on first two MFA partial axes of the Principal Components of the individual datasets, (B) Score plot, and (G) shows non-volatile phenolic compounds. Identified phenolic compounds are presented in Figure S2 (Supporting Information File S1). A\_C = no treatment with chitosan; A\_CC\_C = treatment with chitosan only before harvest; A\_CC\_CC = treatment with chitosan three times a year: beginning of flowering, end of veraison and pre-harvest. The most intense peaks of phenolic were identified and are presented in Figure S2.

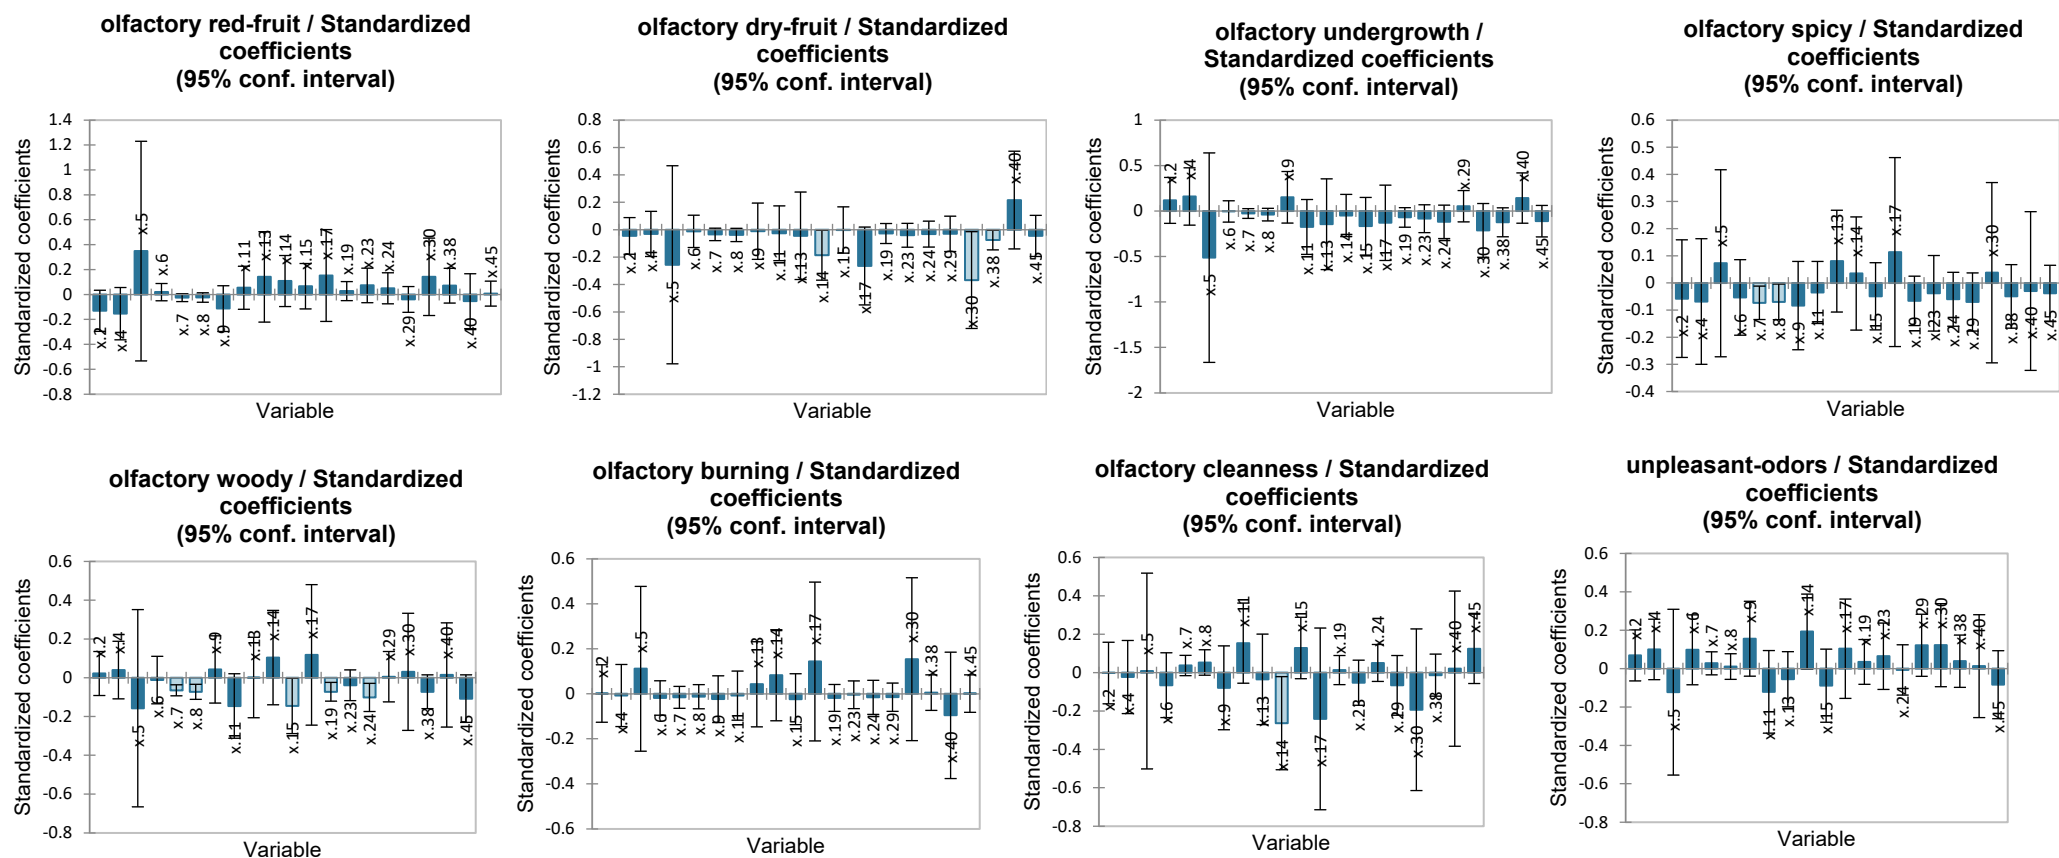

**Figure S5.** PLS-R for the volatile compounds with the olfactory sensory data

VIPs (4 Comp/ 95% conf. interval)

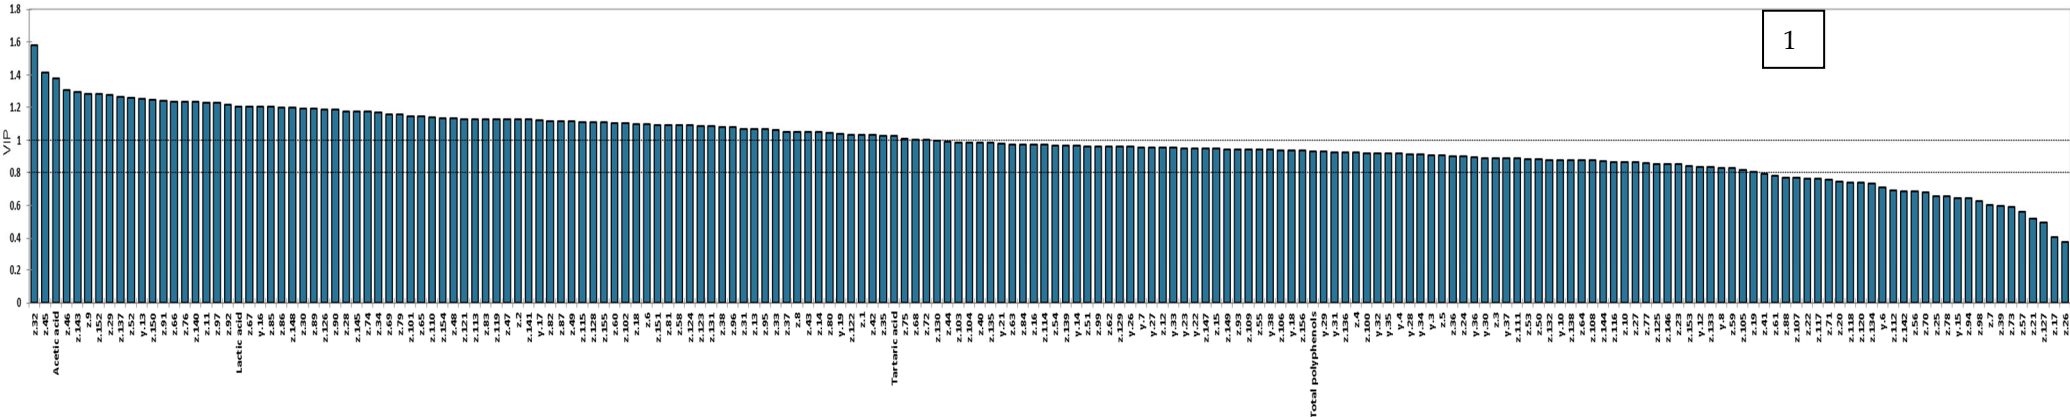

warmness / Standardized coefficients  
(95% conf. interval)

2

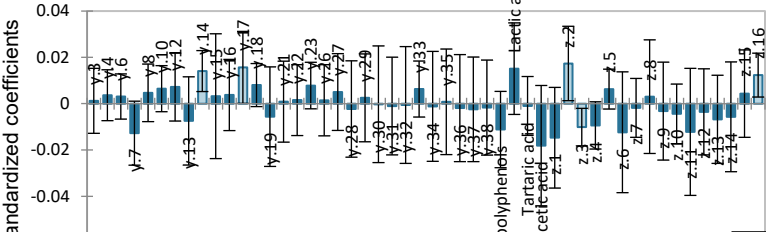

warmness / Standardized coefficients  
(95% conf. interval)

3

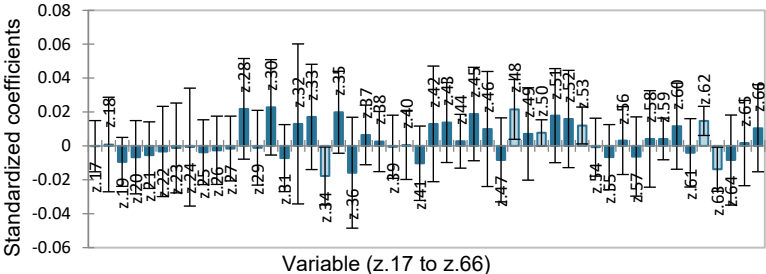

warmness / Standardized coefficients  
(95% conf. interval)

4

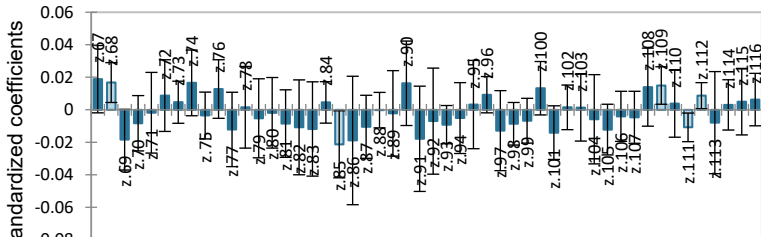

warmness / Standardized coefficients  
(95% conf. interval)

5

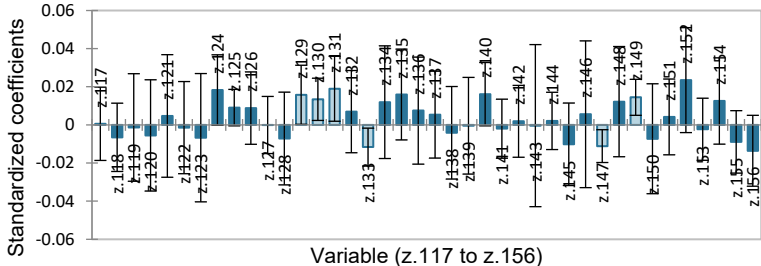



**astringency / Standardized coefficients  
(95% conf. interval)**

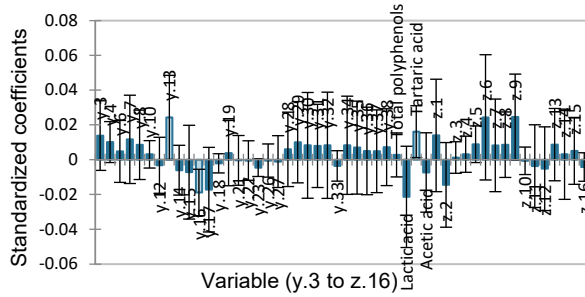

6

**sourness / Standardized coefficients  
(95% conf. interval)**

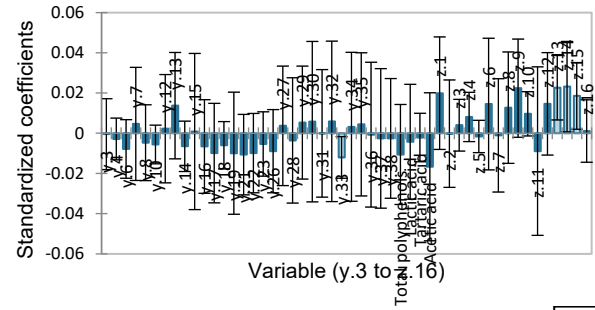

10

**astringency / Standardized coefficients  
(95% conf. interval)**

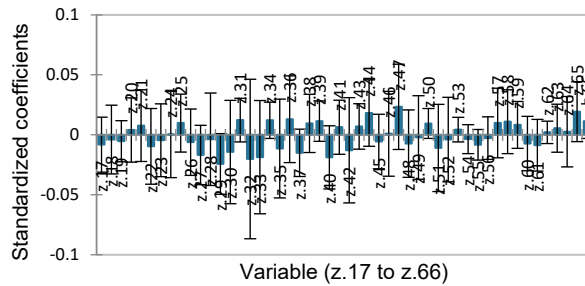

7

**sourness / Standardized coefficients  
(95% conf. interval)**

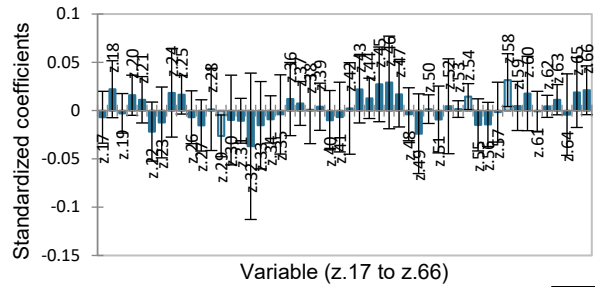

11

**astringency / Standardized coefficients  
(95% conf. interval)**

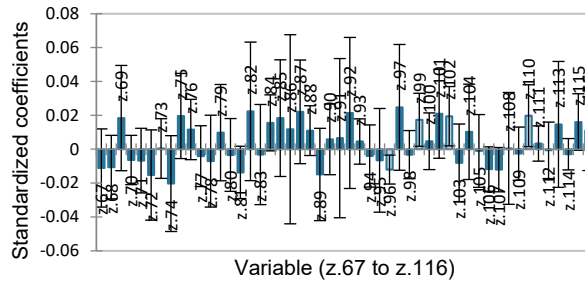

8

**sourness / Standardized coefficients  
(95% conf. interval)**

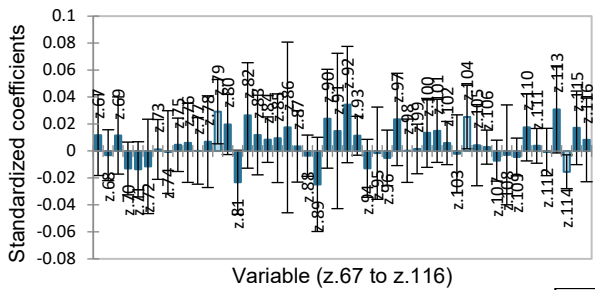

12

**astringency / Standardized coefficients  
(95% conf. interval)**

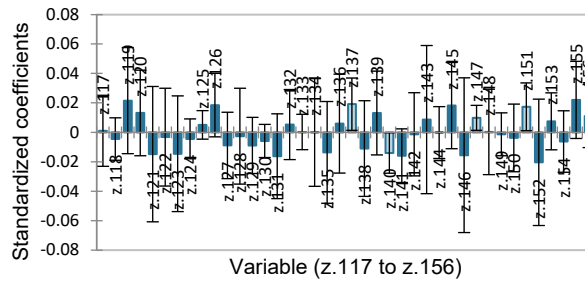

9

**sourness / Standardized coefficients  
(95% conf. interval)**

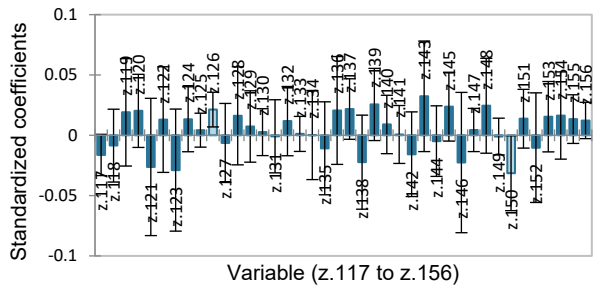

13



color tonality / Standardized coefficients  
(95% conf. interval)

22

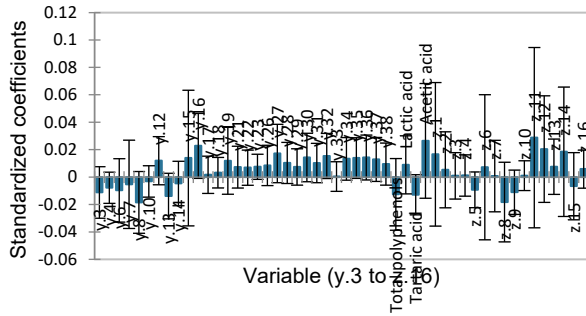

color intensity / Standardized coefficients  
(95% conf. interval)

26

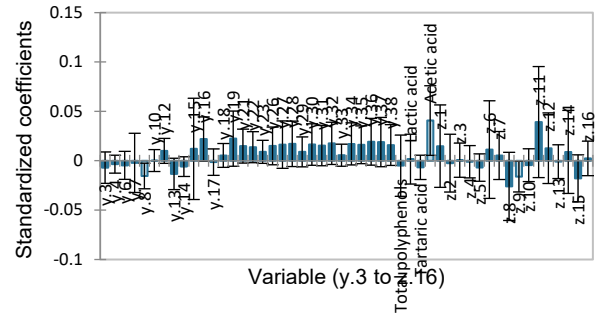

color tonality / Standardized coefficients  
(95% conf. interval)

23

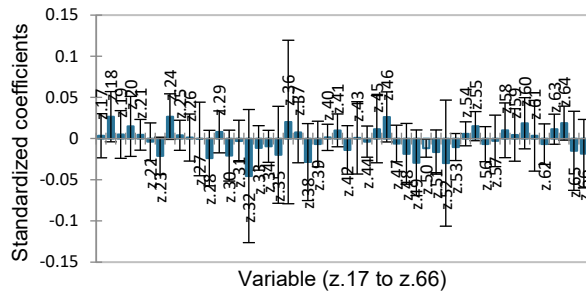

color intensity / Standardized coefficients  
(95% conf. interval)

27

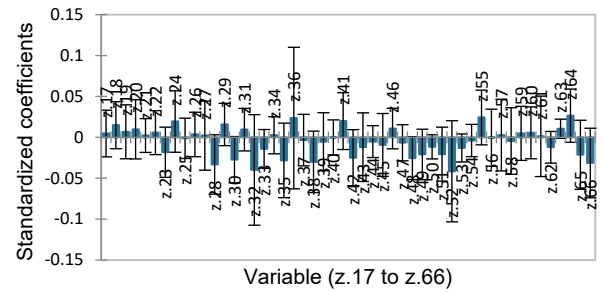

color tonality / Standardized coefficients  
(95% conf. interval)

24

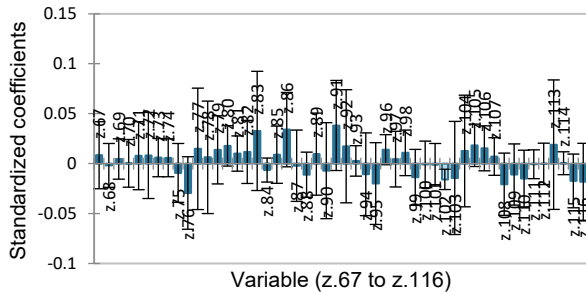

color intensity / Standardized coefficients  
(95% conf. interval)

28

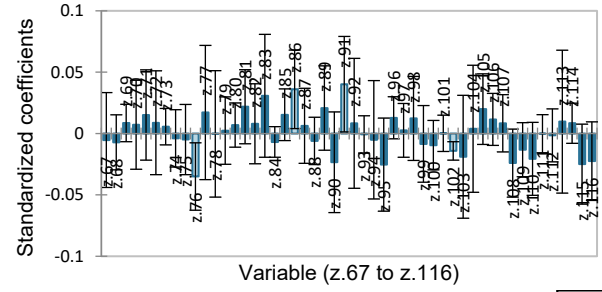

color tonality / Standardized coefficients  
(95% conf. interval)

25

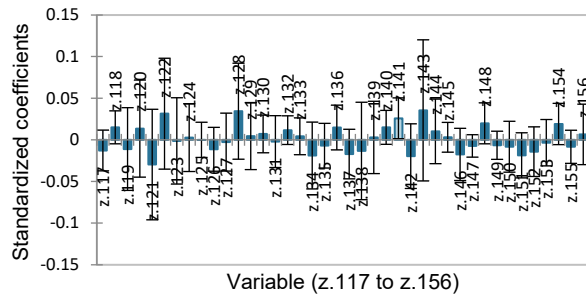

color intensity / Standardized coefficients  
(95% conf. interval)

29

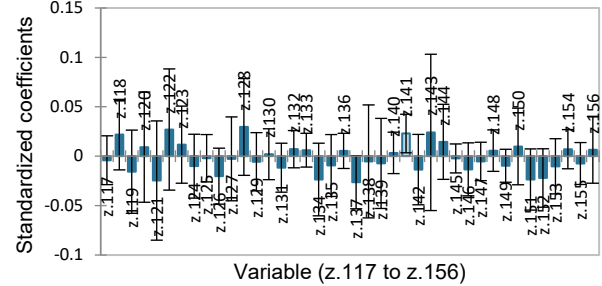

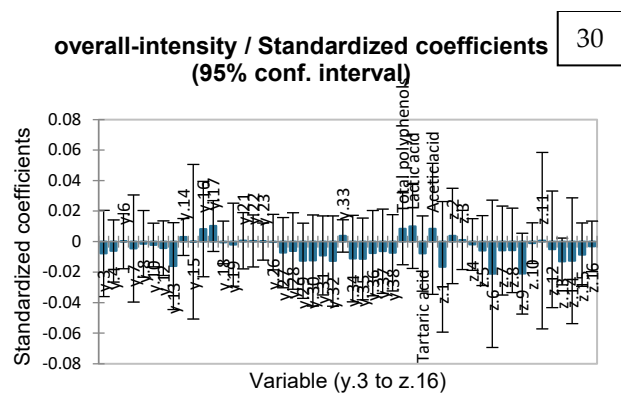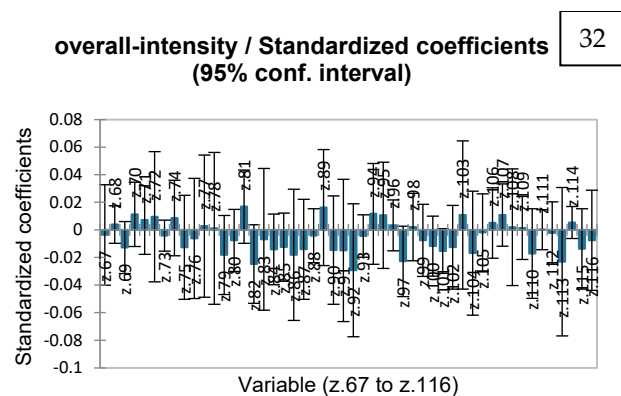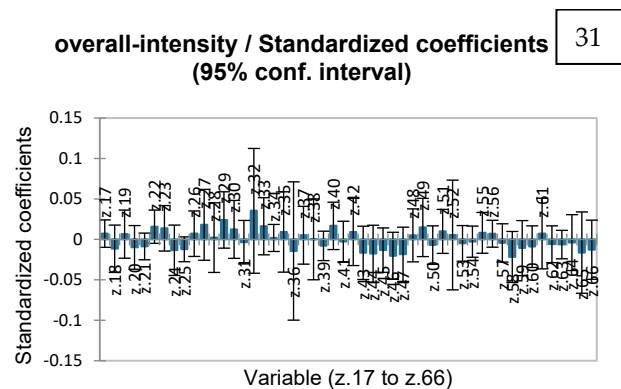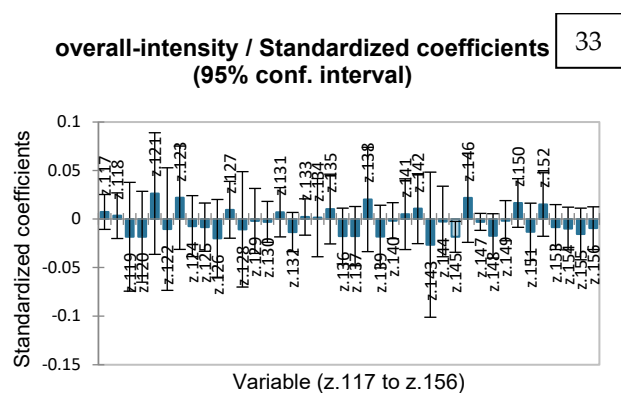

**Figure S6.** PLS-R for the non-volatile phenolic and anthocyanin compounds, basic oenological parameters with the visual and gustatory data.

**Table S2.** One way-ANOVA of the oenological parameters. Numbers in bold mean significant differences by Tukey's test ( $p < 0.05$ ). A: Mazzon vineyard; C: Aldino vineyard; D: Patone vineyard and E: Eggerhof vineyard.

| Vineyard | Malic acid<br>(g/L) | Total polyphenol<br>(mg/L) | Lactic acid<br>(g/L) | Tartaric acid<br>(g/L) | Acetic acid<br>(g/L) |
|----------|---------------------|----------------------------|----------------------|------------------------|----------------------|
| C        | 0.00 a              | 1680.50 a                  | 2.17 b               | 1.18 b                 | 0.34 a               |
| D        | 0.20 a              | 1564.50 a                  | 1.79 c               | 2.04 a                 | 0.23 b               |
| E        | 0.10 a              | 1258.50 a                  | 2.67 a               | 1.11 b                 | 0.27 ab              |
| A        | 0.01 a              | 1841.50 a                  | 1.78 c               | 0.97 b                 | 0.27 ab              |
| Pr > F   | 0.129               | 0.285                      | <b>0.001</b>         | <b>0.001</b>           | 0.051                |

**Table S3** represents the One-way ANOVA of significant differences by Tukey's test ( $p < 0.05$ ) of anthocyanins in wine samples. Mazzon vineyard (A), Aldino vineyard (C), Patone vineyard (D) and Eggerhof vineyard (E). Only the significant compounds are presented and those which could not be identified are represented with their retention time in min (numbers in bold) and their respective code.

| Vineyards | Altitude<br>(m.a.s.l.) | Vineyard<br>exposition | Delphinidin<br>3-glucoside | petunidin-<br>3-glucoside | peonidin-<br>3-glucoside | Malvidin 3-<br>glucoside | Vitisin A | <b>11.98</b><br>[y.22] | <b>12.23</b><br>[y.23] | <b>12.33</b><br>[y.24] | <b>12.57</b><br>[y.25] | <b>12.74</b><br>[y.26] |
|-----------|------------------------|------------------------|----------------------------|---------------------------|--------------------------|--------------------------|-----------|------------------------|------------------------|------------------------|------------------------|------------------------|
| C         | 800                    | South                  | 234240 a                   | 407281 a                  | 514404 b                 | 3378573 b                | 144423 a  | 69839 a                | 39593 a                | 111745 a               | 61009 a                | 168057 a               |
| D         | 800                    | East                   | 277378 a                   | 388532 a                  | 658791 a                 | 3523922 ab               | 78685 c   | 48393 ab               | 30343 ab               | 89304 a                | 52274 a                | 120688 b               |
| E         | 1050-1150              | South                  | 177163 ab                  | 331326 ab                 | 345429 c                 | 3737780 a                | 128610 ab | 42742 ab               | 33766 ab               | 85909 a                | 40990 ab               | 113239 b               |
| A         | 350                    | Nort-west              | 107343 b                   | 189889 b                  | 522037 b                 | 2594939 c                | 90609 bc  | 13489 b                | 9176 b                 | 33097 b                | 20958 b                | 46776 c                |
| Pr > F    |                        |                        | 0.015                      | 0.017                     | 0.002                    | 0.000                    | 0.009     | 0.036                  | 0.041                  | 0.006                  | 0.016                  | 0.002                  |

| Vineyards | Altitude<br>(m.a.s.l.) | Vineyard<br>exposition | <b>13.06</b><br>[y.27] | <b>13.22</b><br>[y.28] | <b>13.59</b><br>[y.31] | <b>14.06</b><br>[y.33] | <b>14.54</b><br>[y.36] | <b>14.7</b><br>[y.37] | <b>14.82</b><br>[y.38] | <b>14.98</b><br>[y.39] | <b>15.82</b><br>[y.43] | <b>16.29</b><br>[y.45] |
|-----------|------------------------|------------------------|------------------------|------------------------|------------------------|------------------------|------------------------|-----------------------|------------------------|------------------------|------------------------|------------------------|
| C         | 800                    | South                  | 61573 a                | 35604 a                | 58005 a                | 18275 a                | 26123 a                | 20902 a               | 26509 a                | 17788 a                | 17187 a                | 22334 b                |
| D         | 800                    | East                   | 38914 ab               | 21221 ab               | 41364 ab               | 14243 a                | 14299 ab               | 10960 ab              | 19725 ab               | 9722 ab                | 9993 ab                | 24523 ab               |
| E         | 1050-1150              | South                  | 46711 ab               | 14313 ab               | 23680 ab               | 12803 a                | 10766 ab               | 7903 ab               | 12306 ab               | 7853 ab                | 9622 ab                | 26802 ab               |
| A         | 350                    | Nort-west              | 14244 b                | 4451 b                 | 1826 b                 | 1044 b                 | 2525 b                 | 2352 b                | 3477 b                 | 2199 b                 | 5143 b                 | 31409 a                |
| Pr > F    |                        |                        | 0.022                  | 0.022                  | 0.030                  | 0.007                  | 0.047                  | 0.032                 | 0.020                  | 0.033                  | 0.024                  | 0.047                  |

**Table S4:** One-way ANOVA on the sensory descriptors. Only the attribute with a significant different by Tukey's test ( $p < 0.05$ ) are presented. Mazzon vineyard (A), Aldino vineyard (C), Patone vineyard (D) and Eggerhof vineyard (E).

| Vineyard | Altitude  | Exposure   | Clarity  | Olfactory dry fruit | Olfactory undergrowth | Warmness |
|----------|-----------|------------|----------|---------------------|-----------------------|----------|
| A        | 350       | North-west | 7.786 a  | 4.143 b             | 2.500 b               | 5.929 b  |
| C        | 800       | South      | 7.071 ab | 5.214 ab            | 3.286 ab              | 6.214 ab |
| D        | 800       | East       | 7.313 ab | 5.313 ab            | 2.813 ab              | 6.313 ab |
| E        | 1050-1150 | South      | 6.583 b  | 5.500 a             | 4.083 a               | 6.750 a  |
| Pr > F   |           |            | 0.016    | 0.032               | 0.035                 | 0.041    |

**Table S5** represents the One-way ANOVA of only the significant phenolic by Tukey's test ( $p < 0.05$ ) in wine. A: Mazzon vineyard; C: Aldino vineyard; D: Patone vineyard and E: Eggerhof vineyard. The most intense and significant phenols identified are *p*-coumaroylquinic acid (z.47); glutathionyl caftaric acid (z.114); coumaric acid (z.133) and astilbin (z.151) reported in bold. Meanwhile, low-intensity phenols not yet identified are reported using codes (z) and are not in bold.

| vineyards | Altitude  | Exposure   | z.2     | z.3     | z.4     | z.5     | z.6     | z.9     | z.10    | z.13   | z.14    | z.16     | z.19    | z.25    | z.27    |
|-----------|-----------|------------|---------|---------|---------|---------|---------|---------|---------|--------|---------|----------|---------|---------|---------|
| D         | 800       | East       | 3083 ab | 27667 c | 487 c   | 3549 a  | 15602 a | 3370 a  | 4793 c  | 4365 b | 1328 b  | 15341 ab | 1709 b  | 2608 a  | 249 b   |
| E         | 1050-1150 | South      | 9368 a  | 29559 c | 448 c   | 1751 b  | 1766 a  | 1773 c  | 5967 b  | 4283 b | 2200 ab | 16514 a  | 2207 ab | 2136 ab | 1527 ab |
| C         | 800       | South      | 3570 ab | 52848 b | 1785 b  | 991 c   | 1914 a  | 2037 bc | 3870 c  | 3721 b | 1998 ab | 13244 ab | 2531 ab | 1333 b  | 1359 ab |
| A         | 350       | North-west | 925 b   | 66314 a | 3234 a  | 150 d   | 7493 a  | 2476 b  | 12236 a | 6563 a | 2508 a  | 11710 b  | 3390 a  | 2596 a  | 2630 a  |
| Pr > F    |           |            | 0.035   | <0.0001 | <0.0001 | <0.0001 | 0.046   | 0.002   | <0.0001 | 0.004  | 0.048   | 0.032    | 0.030   | 0.028   | 0.022   |

  

| vineyards | Altitude  | Exposure   | z.28     | z.29   | z.30     | z.34   | z.37    | <b>z.47</b>    | z.51     | z.52    | z.54     | z.58    | z.59    | z.63   |
|-----------|-----------|------------|----------|--------|----------|--------|---------|----------------|----------|---------|----------|---------|---------|--------|
| D         | 800       | East       | 57417 ab | 2072 b | 15529 ab | 2669 a | 3789 b  | <b>2966 a</b>  | 34086 ab | 35417 a | 7257 bc  | 11192 a | 12102 a | 716 b  |
| E         | 1050-1150 | South      | 57776 a  | 6747 a | 19977 a  | 1190 a | 7049 a  | <b>1909 b</b>  | 37980 a  | 36497 a | 11906 ab | 11131 a | 9382 a  | 690 b  |
| C         | 800       | South      | 44350 b  | 7804 a | 8549 c   | 2859 a | 6005 ab | <b>2209 ab</b> | 35791 a  | 29579 b | 4338 c   | 7589 b  | 9353 ab | 1299 b |
| A         | 350       | North-west | 44889 ab | 5925 a | 11330 bc | 2933 a | 7038 a  | <b>2764 ab</b> | 30287 b  | 40155 a | 14730 a  | 10645 a | 5810 b  | 3261 a |
| Pr > F    |           |            | 0.022    | 0.008  | 0.006    | 0.048  | 0.027   | <b>0.024</b>   | 0.011    | 0.007   | 0.003    | 0.015   | 0.009   | 0.003  |

  

| vineyards | Altitude  | Exposure   | z.69    | z.70    | z.74   | z.76   | z.82    | z.83    | z.84    | z.85   | z.87   | z.91    | z.93    | z.94    |
|-----------|-----------|------------|---------|---------|--------|--------|---------|---------|---------|--------|--------|---------|---------|---------|
| D         | 800       | East       | 14139 a | 367 b   | 263 b  | 4816 a | 2597 a  | 1750 b  | 26492 a | 6763 a | 3071 a | 1345 b  | 658 b   | 4236 b  |
| E         | 1050-1150 | South      | 9902 b  | 1980 b  | 4660 a | 1932 b | 1246 ab | 6384 ab | 15183 b | 2103 b | 1024 b | 1761 ab | 94 b    | 4225 b  |
| C         | 800       | South      | 14237 a | 11558 a | 856 b  | 986 b  | 789 b   | 3456 ab | 15497 b | 8060 a | 1416 b | 2841 a  | 1504 ab | 7354 a  |
| A         | 350       | North-west | 14998 a | 6276 ab | 372 b  | 1941 b | 1426 ab | 6818 a  | 8601 c  | 8188 a | 1100 b | 1599 ab | 2608 a  | 5471 ab |
| Pr > F    |           |            | 0.000   | 0.006   | 0.003  | 0.003  | 0.028   | 0.039   | 0.001   | 0.001  | 0.013  | 0.042   | 0.014   | 0.030   |



| vineyards | Altitude  | Exposure   | z.96   | z.97    | z.98    | z.101    | z.102   | z.105    | z.106   | z.109  | z.110   | <b>z.114</b>   | z.115  |
|-----------|-----------|------------|--------|---------|---------|----------|---------|----------|---------|--------|---------|----------------|--------|
| D         | 800       | East       | 4053 b | 11836 a | 1431 d  | 12854 a  | 7480 a  | 19524 b  | 720 b   | 4429 a | 6845 a  | <b>11637 b</b> | 7186 a |
| E         | 1050-1150 | South      | 6181 a | 2056 b  | 8847 c  | 8686 b   | 2958 b  | 24336 b  | 2839 a  | 4464 a | 4003 b  | <b>10524 b</b> | 2883 b |
| C         | 800       | South      | 5669 a | 8985 a  | 37926 a | 10969 ab | 2407 b  | 44980 a  | 1713 ab | 2485 a | 4945 ab | <b>15399 a</b> | 3508 b |
| A         | 350       | North-west | 2587 b | 8670 a  | 17629 b | 12358 a  | 3211 ab | 31403 ab | 3448 a  | 2244 a | 4326 ab | <b>2937 c</b>  | 3790 b |
| Pr > F    |           |            | 0.003  | 0.003   | <0.0001 | 0.009    | 0.027   | 0.009    | 0.014   | 0.037  | 0.046   | <b>0.000</b>   | 0.003  |

| vineyards | Altitude  | Exposure   | z.118   | z.125  | z.130     | <b>z.133</b>   | z.140   | z.144   | z.145   | z.149   | <b>z.151</b>      | z.152   | z.153 | z.156  |
|-----------|-----------|------------|---------|--------|-----------|----------------|---------|---------|---------|---------|-------------------|---------|-------|--------|
| D         | 800       | East       | 227 c   | 9046 a | 134688 ab | <b>6213 b</b>  | 3801 ab | 3182 ab | 4359 ab | 3021 a  | <b>15145 a</b>    | 2234 ab | 423 b | 5703 b |
| E         | 1050-1150 | South      | 1175 b  | 8235 a | 152101 a  | <b>6500 ab</b> | 8322 a  | 3030 ab | 1266 b  | 1618 b  | <b>2452 c</b>     | 4495 a  | 424 b | 3561 c |
| C         | 800       | South      | 5662 a  | 5981 b | 132870 ab | <b>9369 a</b>  | 4579 ab | 3603 a  | 3452 ab | 1631 b  | <b>8368 b</b>     | 1854 b  | 778 a | 3795 c |
| A         | 350       | North-west | 207 c   | 5447 b | 105502 b  | <b>8915 ab</b> | 3386 b  | 1620 b  | 5959 a  | 202 c   | <b>4565 c</b>     | 1858 b  | 934 a | 8209 a |
| Pr > F    |           |            | <0.0001 | 0.001  | 0.019     | <b>0.028</b>   | 0.038   | 0.026   | 0.016   | <0.0001 | <b>&lt;0.0001</b> | 0.037   | 0.008 | 0.000  |

**Table S6.** One way-ANOVA of the oenological parameters. Numbers in bold mean significant different by Tukey's test ( $p < 0.05$ ). A\_C = no treatment with chitosan; A\_CC\_C = treatment with chitosan only before harvest; A\_CC\_CC = treatment with chitosan all year.

| Chitosan treatment | Malic acid<br>( $\pm 0.01$ g/L) | Total polyphenol<br>( $\pm 0.01$ mg/L) | Lactic acid<br>( $\pm 0.01$ g/L) | Tartaric acid<br>( $\pm 0.01$ g/L) | Acetic acid<br>( $\pm 0.01$ g/L) |
|--------------------|---------------------------------|----------------------------------------|----------------------------------|------------------------------------|----------------------------------|
| A_CC_CC            | 0.000 a                         | 1825.500 a                             | 1.974 a                          | 1.163 a                            | 0.226 b                          |
| A_C                | 0.008 a                         | 1841.500 a                             | 1.784 a                          | 0.969 b                            | 0.275 ab                         |
| A_CC_C             | 0.000 a                         | 1734.000 a                             | 1.895 a                          | 0.996 b                            | 0.323 a                          |
| Pr > F             | 0.465                           | 0.954                                  | 0.257                            | <b>0.001</b>                       | <b>0.019</b>                     |

**Table S7** represents the One-way ANOVA of significant differences by Tukey's test ( $p < 0.05$ ) of anthocyanins in wines from Mazzon vineyard. A\_C = no treatment with chitosan; A\_CC\_C = treatment with chitosan only before harvest; A\_CC\_CC = treatment with chitosan all year. Only the significant compounds are presented and those which could not be identified are represented with their retention time (Rt) in min and their respective code.

| Mazzon  | Delphinidin<br>3-glucoside | Rt. 6.47<br>code [y.6] | Rt. 6.66<br>code [y.7] | Rt. 6.92<br>code [y.8] | petunidin-<br>3-glucoside | peonidin-3-<br>glucoside | Rt. 14.82<br>code [y.38] | Rt. 15.82<br>code [y.43] | Rt. 16.05<br>code [y.44] | Rt. 16.42<br>code [y.46] |
|---------|----------------------------|------------------------|------------------------|------------------------|---------------------------|--------------------------|--------------------------|--------------------------|--------------------------|--------------------------|
| A_CC_C  | 101615 b                   | 5972 b                 | 10869 b                | 21849 b                | 182705 b                  | 516186 b                 | 3742 a                   | 5456 a                   | 3335 b                   | 2445 b                   |
| A_C     | 107343 b                   | 5779 b                 | 10738 b                | 21807 b                | 189889 b                  | 522037 b                 | 3477 a                   | 5143 a                   | 3389 b                   | 2600 b                   |
| A_CC_CC | 133303 a                   | 6508 a                 | 11444 a                | 29007 a                | 220558 a                  | 644495 a                 | 2702 b                   | 3929 b                   | 4387 a                   | 3378 a                   |
| Pr > F  | 0.009                      | 0.024                  | 0.012                  | 0.000                  | 0.023                     | 0.003                    | 0.038                    | 0.017                    | 0.011                    | 0.015                    |

**Table S8** represents the One-way ANOVA of only the significant phenolic compounds by Tukey's test ( $p < 0.05$ ) in wine from Mazzon vineyard. A\_C = no treatment with chitosan; A\_CC\_C = treatment with chitosan only before harvest; A\_CC\_CC = treatment with chitosan all year. The most intense and significant phenols identified are trans-caftaric acid (z.117) and catechin (z.134) reported in bold. Meanwhile, low-intensity phenols not yet identified are reported using codes (z) and are not in bold.

| Mazzon  | z.9    | z.13   | z.28    | z.29   | z.35   | z.40    | z.42    | z.54     | z.69    | z.84    | z.88   | z.93   | z.95   |
|---------|--------|--------|---------|--------|--------|---------|---------|----------|---------|---------|--------|--------|--------|
| A_CC_CC | 3433 a | 8018 a | 52844 a | 2582 b | 3504 a | 9997 b  | 13704 a | 16254 ab | 16087 a | 14414 a | 2099 a | 3263 a | 4986 a |
| A_CC_C  | 2584 b | 7614 a | 40880 b | 5612 a | 2463 b | 12633 a | 9375 b  | 16973 a  | 16529 a | 8207 b  | 1952 a | 2732 b | 3729 b |
| A_C     | 2476 b | 6563 b | 44889 b | 5925 a | 3042 a | 12816 a | 9113 b  | 14730 b  | 14998 b | 8601 b  | 1158 b | 2608 b | 4562 a |
| Pr > F  | 0.027  | 0.042  | 0.022   | 0.022  | 0.016  | 0.009   | 0.017   | 0.048    | 0.016   | 0.021   | 0.040  | 0.018  | 0.027  |

| Mazzon  | z.102   | z.104  | z.108  | <b>z.117</b>  | z.118  | z.125  | z.126  | z.129  | <b>z.134</b>  | z.149 |
|---------|---------|--------|--------|---------------|--------|--------|--------|--------|---------------|-------|
| A_CC_CC | 4207 a  | 6134 a | 2325 a | <b>4730 a</b> | 1042 a | 6014 a | 7093 a | 3478 a | <b>7271 a</b> | 983 a |
| A_CC_C  | 2592. b | 1662 b | 1529 b | <b>2751 b</b> | 604 b  | 6086 a | 4618 b | 2636 b | <b>4369 b</b> | 92 b  |
| A_C     | 3211 b  | 707 b  | 1557 b | <b>2907 b</b> | 207 c  | 5447 b | 5340 b | 3514 a | <b>4483 b</b> | 202 b |
| Pr > F  | 0.012   | 0.034  | 0.047  | <b>0.006</b>  | 0.000  | 0.049  | 0.009  | 0.008  | <b>0.000</b>  | 0.001 |
