# Supplementary material for: Terroir Dynamics: Impact of Vineyard and Canopy Treatment with Chitosan on Anthocyanins, Phenolics, and Volatile and Sensory Profiles of Pinot Noir Wines from South Tyrol
Source: MDPI journal article supplement (doi:10.3390/molecules29091916), 2024-04-23
Supplement: s1 [file supporting information file S2.xlsx]

## Sheet: OQJ PLS
	Summary statistics:
	Variable	Observations	Obs. with missing data	Obs. without missing data	Minimum	Maximum	Mean	Std. deviation
	overall-quality	13	0	13	5	7.375	6.20421	0.707526
	clarity	13	0	13	6.33333	8.5	7.67255	0.69898
	color tonality	13	0	13	2.5	4.875	3.3109	0.756667
	color intensity	13	0	13	3.14286	4.85714	4.04212	0.518697
	overall-intensity	13	0	13	5.85714	7.75	6.57967	0.517535
	olf.red-fruit	13	0	13	4.42857	5.75	4.96016	0.363643
	olf.dry-fruit	13	0	13	4	5.83333	4.86264	0.540103
	olf.undergrowth	13	0	13	2.5	4.16667	3.34112	0.431033
	olf.spicy	13	0	13	2.375	4.71429	3.82234	0.819816
	olf.woody	13	0	13	3.125	5.57143	4.2065	0.813044
	olf.burning	13	0	13	2.5	4.85714	3.8109	0.607265
	olf.cleanness	13	0	13	6.28571	8	7.27015	0.519068
	unpleasant-odors	13	0	13	1.375	2.875	2.15842	0.454579
	warmness	13	0	13	5.125	6.83333	5.90659	0.567459
	astringency	13	0	13	3	5.57143	4.42033	0.780218
	sourness	13	0	13	3.83333	5.28571	4.54808	0.422629
	sweetness	13	0	13	1.71429	3.375	2.63187	0.520597
	bitterness	13	0	13	2.5	5	3.86355	0.928818
	salty-sapidity	13	0	13	2.5	4.57143	3.55266	0.587715
	gust.red-fruit	13	0	13	3.75	5.28571	4.71841	0.427153
	gust.woody	13	0	13	2.875	5.42857	4.19185	0.796078
	gust.spicy	13	0	13	2.625	5.28571	4.26236	0.735745
	gust.full-bodied/viscous	13	0	13	3.375	6.14286	4.69002	0.925869
	gust.cleanness	13	0	13	5.85714	7.875	7.10852	0.524565
	unpleasant-flavors	13	0	13	1.625	3	2.19505	0.418337
	Correlation matrix:
	Variables	clarity	color tonality	color intensity	overall-intensity	olf.red-fruit	olf.dry-fruit	olf.undergrowth	olf.spicy	olf.woody	olf.burning	olf.cleanness	unpleasant-odors	warmness	astringency	sourness	sweetness	bitterness	salty-sapidity	gust.red-fruit	gust.woody	gust.spicy	gust.full-bodied/viscous	gust.cleanness	unpleasant-flavors	overall-quality
	clarity	1	0.434519	-0.0161857	0.410537	-0.144102	-0.804312	-0.710428	-0.241683	-0.257342	0.299758	-0.00854916	0.452308	-0.745525	-0.399617	0.26599	0.751035	-0.672117	0.776505	-0.412183	-0.472596	-0.213102	-0.513171	0.415831	0.0198446	0.414451
	color tonality	0.434519	1	0.248222	0.63507	-0.341852	-0.369194	-0.186795	-0.769335	-0.361884	-0.166898	0.16085	0.359282	-0.442605	-0.637984	-0.388862	0.624594	-0.610234	0.177381	-0.231758	-0.20442	-0.708186	-0.610624	0.662	-0.298737	0.796926
	color intensity	-0.0161857	0.248222	1	0.243521	-0.492135	0.0800359	0.112974	-0.114719	0.117888	0.365794	-0.0913101	0.0429055	-0.172088	-0.0882904	-0.353124	-0.0205141	0.16585	-0.184729	-0.540596	0.494191	0.0421492	-0.00470892	0.313159	-0.215626	0.332648
	overall-intensity	0.410537	0.63507	0.243521	1	-0.0711564	-0.215068	-0.294119	-0.798253	-0.778389	-0.0793113	0.304616	0.244967	-0.299455	-0.643461	-0.337709	0.487916	-0.608205	-0.0468783	-0.523295	-0.455157	-0.771004	-0.721753	0.582179	-0.100643	0.794281
	olf.red-fruit	-0.144102	-0.341852	-0.492135	-0.0711564	1	0.302606	-0.302114	0.255981	0.083499	-0.209795	0.0757474	-0.461905	0.0204291	0.449311	0.408127	-0.212916	0.148073	-0.153161	0.239622	-0.114201	0.0425832	-0.155384	-0.478947	0.523066	-0.46219
	olf.dry-fruit	-0.804312	-0.369194	0.0800359	-0.215068	0.302606	1	0.302005	0.12523	0.0596373	-0.51627	0.343855	-0.638913	0.466694	0.209782	-0.047923	-0.49089	0.582373	-0.637877	0.0329508	0.356208	-0.0537119	0.138245	-0.414445	0.276992	-0.304313
	olf.undergrowth	-0.710428	-0.186795	0.112974	-0.294119	-0.302114	0.302005	1	0.0453653	0.300365	-0.198731	-0.330202	0.112753	0.625062	0.181487	-0.366209	-0.441141	0.356938	-0.552418	0.4708	0.264336	0.240928	0.611224	-0.230493	-0.194283	-0.259363
	olf.spicy	-0.241683	-0.769335	-0.114719	-0.798253	0.255981	0.12523	0.0453653	1	0.700348	0.42779	-0.432039	-0.259344	0.187884	0.727031	0.323038	-0.412731	0.745959	0.173871	0.355626	0.57501	0.856514	0.705687	-0.605214	0.150129	-0.826603
	olf.woody	-0.257342	-0.361884	0.117888	-0.778389	0.083499	0.0596373	0.300365	0.700348	1	0.251026	-0.588943	-0.0595442	0.0833944	0.769907	0.314579	-0.334129	0.543934	0.088801	0.377497	0.620218	0.69296	0.679193	-0.544519	0.222637	-0.686735
	olf.burning	0.299758	-0.166898	0.365794	-0.0793113	-0.209795	-0.51627	-0.198731	0.42779	0.251026	1	-0.361219	0.0670856	-0.102269	0.311941	-0.0866074	-0.196637	0.129427	0.22347	-0.0667822	0.370571	0.503305	0.345693	0.229183	-0.402487	0.0260314
	olf.cleanness	-0.00854916	0.16085	-0.0913101	0.304616	0.0757474	0.343855	-0.330202	-0.432039	-0.588943	-0.361219	1	-0.585355	0.0641584	-0.378533	-0.23161	-0.0213694	-0.203937	-0.310741	-0.145104	-0.357581	-0.532059	-0.547188	0.444026	-0.143544	0.476422
	unpleasant-odors	0.452308	0.359282	0.0429055	0.244967	-0.461905	-0.638913	0.112753	-0.259344	-0.0595442	0.0670856	-0.585355	1	-0.268153	-0.282569	0.00407856	0.578353	-0.383323	0.512354	-0.257594	-0.286574	-0.0878885	-0.0760196	0.0869733	0.0892267	0.173298
	warmness	-0.745525	-0.442605	-0.172088	-0.299455	0.0204291	0.466694	0.625062	0.187884	0.0833944	-0.102269	0.0641584	-0.268153	1	0.325929	-0.32916	-0.715937	0.444111	-0.53594	0.449993	0.144276	0.111522	0.514719	-0.0872762	-0.18531	-0.216908
	astringency	-0.399617	-0.637984	-0.0882904	-0.643461	0.449311	0.209782	0.181487	0.727031	0.769907	0.311941	-0.378533	-0.282569	0.325929	1	0.273535	-0.616758	0.631943	-0.195654	0.369119	0.462827	0.638066	0.600265	-0.619665	0.362735	-0.728073
	sourness	0.26599	-0.388862	-0.353124	-0.337709	0.408127	-0.047923	-0.366209	0.323038	0.314579	-0.0866074	-0.23161	0.00407856	-0.32916	0.273535	1	0.0712827	-0.164806	0.439062	-0.145442	-0.187022	0.252377	0.065247	-0.572613	0.659033	-0.508777
	sweetness	0.751035	0.624594	-0.0205141	0.487916	-0.212916	-0.49089	-0.441141	-0.412731	-0.334129	-0.196637	-0.0213694	0.578353	-0.715937	-0.616758	0.0712827	1	-0.518273	0.68681	-0.376913	-0.37948	-0.473088	-0.57096	0.237228	0.165541	0.40012
	bitterness	-0.672117	-0.610234	0.16585	-0.608205	0.148073	0.582373	0.356938	0.745959	0.543934	0.129427	-0.203937	-0.383323	0.444111	0.631943	-0.164806	-0.518273	1	-0.302331	0.282149	0.761354	0.578266	0.611314	-0.534145	0.107555	-0.642577
	salty-sapidity	0.776505	0.177381	-0.184729	-0.0468783	-0.153161	-0.637877	-0.552418	0.173871	0.088801	0.22347	-0.310741	0.512354	-0.53594	-0.195654	0.439062	0.68681	-0.302331	1	-0.213978	-0.165975	0.0385462	-0.119472	0.0483113	0.151464	0.00416529
	gust.red-fruit	-0.412183	-0.231758	-0.540596	-0.523295	0.239622	0.0329508	0.4708	0.355626	0.377497	-0.0667822	-0.145104	-0.257594	0.449993	0.369119	-0.145442	-0.376913	0.282149	-0.213978	1	0.149605	0.324172	0.53023	-0.231877	-0.285039	-0.425618
	gust.woody	-0.472596	-0.20442	0.494191	-0.455157	-0.114201	0.356208	0.264336	0.57501	0.620218	0.370571	-0.357581	-0.286574	0.144276	0.462827	-0.187022	-0.37948	0.761354	-0.165975	0.149605	1	0.459053	0.604796	-0.281103	-0.16621	-0.332268
	gust.spicy	-0.213102	-0.708186	0.0421492	-0.771004	0.0425832	-0.0537119	0.240928	0.856514	0.69296	0.503305	-0.532059	-0.0878885	0.111522	0.638066	0.252377	-0.473088	0.578266	0.0385462	0.324172	0.459053	1	0.698497	-0.486884	-0.0130153	-0.756319
	gust.full-bodied/viscous	-0.513171	-0.610624	-0.00470892	-0.721753	-0.155384	0.138245	0.611224	0.705687	0.679193	0.345693	-0.547188	-0.0760196	0.514719	0.600265	0.065247	-0.57096	0.611314	-0.119472	0.53023	0.604796	0.698497	1	-0.482309	-0.137002	-0.620822
	gust.cleanness	0.415831	0.662	0.313159	0.582179	-0.478947	-0.414445	-0.230493	-0.605214	-0.544519	0.229183	0.444026	0.0869733	-0.0872762	-0.619665	-0.572613	0.237228	-0.534145	0.0483113	-0.231877	-0.281103	-0.486884	-0.482309	1	-0.694752	0.896034
	unpleasant-flavors	0.0198446	-0.298737	-0.215626	-0.100643	0.523066	0.276992	-0.194283	0.150129	0.222637	-0.402487	-0.143544	0.0892267	-0.18531	0.362735	0.659033	0.165541	0.107555	0.151464	-0.285039	-0.16621	-0.0130153	-0.137002	-0.694752	1	-0.481246
	overall-quality	0.414451	0.796926	0.332648	0.794281	-0.46219	-0.304313	-0.259363	-0.826603	-0.686735	0.0260314	0.476422	0.173298	-0.216908	-0.728073	-0.508777	0.40012	-0.642577	0.00416529	-0.425618	-0.332268	-0.756319	-0.620822	0.896034	-0.481246	1
	Model quality:
	Statistic	Comp1
	Q² cum	0.784827
	R²Y cum	0.880639
	R²X cum	0.347246
	Correlation matrix of the variables with the t and u~ components:
		t1	u~1
	clarity	0.569429	0.414451
	color tonality	0.817458	0.796926
	color intensity	0.195689	0.332648
	overall-intensity	0.851015	0.794281
	olf.red-fruit	-0.36692	-0.46219
	olf.dry-fruit	-0.385175	-0.304313
	olf.undergrowth	-0.359264	-0.259363
	olf.spicy	-0.870979	-0.826603
	olf.woody	-0.772946	-0.686735
	olf.burning	-0.122544	0.0260314
	olf.cleanness	0.440665	0.476422
	unpleasant-odors	0.308216	0.173298
	warmness	-0.399934	-0.216908
	astringency	-0.850892	-0.728073
	sourness	-0.360206	-0.508777
	sweetness	0.620092	0.40012
	bitterness	-0.76462	-0.642577
	salty-sapidity	0.158217	0.00416529
	gust.red-fruit	-0.481867	-0.425618
	gust.woody	-0.533793	-0.332268
	gust.spicy	-0.780541	-0.756319
	gust.full-bodied/viscous	-0.783006	-0.620822
	gust.cleanness	0.810691	0.896034
	unpleasant-flavors	-0.319355	-0.481246
	overall-quality	0.938424	1
	w vectors:
	Variable	w1
	clarity	0.156347
	color tonality	0.300632
	color intensity	0.125488
	overall-intensity	0.299634
	olf.red-fruit	-0.174356
	olf.dry-fruit	-0.114799
	olf.undergrowth	-0.0978418
	olf.spicy	-0.311827
	olf.woody	-0.259064
	olf.burning	0.00982009
	olf.cleanness	0.179725
	unpleasant-odors	0.0653749
	warmness	-0.0818262
	astringency	-0.274658
	sourness	-0.191931
	sweetness	0.150941
	bitterness	-0.242405
	salty-sapidity	0.00157131
	gust.red-fruit	-0.16056
	gust.woody	-0.125344
	gust.spicy	-0.285313
	gust.full-bodied/viscous	-0.234199
	gust.cleanness	0.338019
	unpleasant-flavors	-0.181545
	w* vectors:
	Variable	w*1
	clarity	0.156347
	color tonality	0.300632
	color intensity	0.125488
	overall-intensity	0.299634
	olf.red-fruit	-0.174356
	olf.dry-fruit	-0.114799
	olf.undergrowth	-0.0978418
	olf.spicy	-0.311827
	olf.woody	-0.259064
	olf.burning	0.00982009
	olf.cleanness	0.179725
	unpleasant-odors	0.0653749
	warmness	-0.0818262
	astringency	-0.274658
	sourness	-0.191931
	sweetness	0.150941
	bitterness	-0.242405
	salty-sapidity	0.00157131
	gust.red-fruit	-0.16056
	gust.woody	-0.125344
	gust.spicy	-0.285313
	gust.full-bodied/viscous	-0.234199
	gust.cleanness	0.338019
	unpleasant-flavors	-0.181545
	c vectors:
	Variable	c1
	overall-quality	0.332212
	p vectors:
	Variable	p1
	clarity	0.201584
	color tonality	0.289388
	color intensity	0.0692761
	overall-intensity	0.301268
	olf.red-fruit	-0.129893
	olf.dry-fruit	-0.136356
	olf.undergrowth	-0.127183
	olf.spicy	-0.308336
	olf.woody	-0.273631
	olf.burning	-0.043382
	olf.cleanness	0.156
	unpleasant-odors	0.109112
	warmness	-0.141581
	astringency	-0.301225
	sourness	-0.127517
	sweetness	0.219519
	bitterness	-0.270683
	salty-sapidity	0.0560104
	gust.red-fruit	-0.170586
	gust.woody	-0.188968
	gust.spicy	-0.27632
	gust.full-bodied/viscous	-0.277192
	gust.cleanness	0.286993
	unpleasant-flavors	-0.113055
	Scores on t:
	Observation	t1
	A_CC_C1	-2.50374
	A_CC_C2	-1.20804
	A_CC_CC1	-3.19739
	A_CC_CC2	-2.26096
	C1	-1.88446
	C2	-0.704752
	D2	-2.55009
	E1	-1.11783
	E2	0.136819
	2PN_A	4.23173
	2PN_B	4.77628
	XPN_A	2.68571
	XPN_B	3.59672
	A1	-1.2653
	A2	-0.22009
	D1	-2.37941
	The scores corresponding to the validation set are displayed in the second part of the table
	Standardized scores on t:
	Observation	t1
	A_CC_C1	-0.255867
	A_CC_C2	-0.123455
	A_CC_CC1	-0.326754
	A_CC_CC2	-0.231056
	C1	-0.19258
	C2	-0.0720215
	D2	-0.260604
	E1	-0.114236
	E2	0.013982
	2PN_A	0.432458
	2PN_B	0.488107
	XPN_A	0.274464
	XPN_B	0.367563
	A1	-0.129306
	A2	-0.0224918
	D1	-0.243161
	The scores corresponding to the validation set are displayed in the second part of the table
	Scores on u:
	Observation	u1
	A_CC_C1	-2.08437
	A_CC_C2	-1.47659
	A_CC_CC1	-5.12325
	A_CC_CC2	-2.69214
	C1	0.954523
	C2	-0.86881
	D2	-2.99603
	E1	-0.86881
	E2	0.549337
	2PN_A	3.91744
	2PN_B	4.98105
	XPN_A	2.32202
	XPN_B	3.38563
	Scores on u~:
	Observation	u~1
	A_CC_C1	-2.08437
	A_CC_C2	-1.47659
	A_CC_CC1	-5.12325
	A_CC_CC2	-2.69214
	C1	0.954523
	C2	-0.86881
	D2	-2.99603
	E1	-0.86881
	E2	0.549337
	2PN_A	3.91744
	2PN_B	4.98105
	XPN_A	2.32202
	XPN_B	3.38563
	Q² quality index:
	Component	Comp1
	overall-quality	0.784827
	Total	0.784827
	Cumulative Q² quality index:
	Component	Comp1
	overall-quality	0.784827
	Total	0.784827
	Variable Importance in the Projection (VIP):
	Variable	VIP(1)	Standard deviation	Lower bound(95%)	Upper bound(95%)
	gust.cleanness	1.65595	0.475093	0.62081	2.69109
	olf.spicy	1.52764	0.188863	1.11614	1.93913
	color tonality	1.47279	0.317197	0.781677	2.1639
	overall-intensity	1.4679	0.346267	0.713449	2.22235
	gust.spicy	1.39774	0.390027	0.547949	2.24754
	astringency	1.34554	0.236215	0.830874	1.86021
	olf.woody	1.26915	0.212567	0.806002	1.73229
	bitterness	1.18754	0.266325	0.607267	1.76781
	gust.full-bodied/viscous	1.14733	0.302332	0.488609	1.80606
	sourness	0.940264	0.506655	-0.163643	2.04417
	unpleasant-flavors	0.889385	0.654338	-0.536294	2.31506
	olf.cleanness	0.88047	0.577911	-0.37869	2.13963
	olf.red-fruit	0.854169	0.508922	-0.254676	1.96301
	gust.red-fruit	0.78658	0.504929	-0.313566	1.88673
	clarity	0.765941	0.270343	0.176914	1.35497
	sweetness	0.739457	0.3946	-0.120302	1.59922
	color intensity	0.614763	0.513788	-0.504686	1.73421
	gust.woody	0.61406	0.356312	-0.162277	1.3904
	olf.dry-fruit	0.562397	0.422969	-0.359173	1.48397
	olf.undergrowth	0.479325	0.430949	-0.459632	1.41828
	warmness	0.400865	0.51551	-0.722334	1.52406
	unpleasant-odors	0.32027	0.5048	-0.779594	1.42014
	olf.burning	0.0481084	0.253894	-0.505079	0.601296
	salty-sapidity	0.00769782	0.217691	-0.466609	0.482005
	Model parameters:
	Variable	overall-quality
	Intercept	6.81769
	clarity	0.0525754
	color tonality	0.0933872
	color intensity	0.056865
	overall-intensity	0.136084
	olf.red-fruit	-0.112699
	olf.dry-fruit	-0.0499595
	olf.undergrowth	-0.0533544
	olf.spicy	-0.0894036
	olf.woody	-0.0748944
	olf.burning	0.00380097
	olf.cleanness	0.0813846
	unpleasant-odors	0.0338033
	warmness	-0.0338934
	astringency	-0.0827433
	sourness	-0.106744
	sweetness	0.0681496
	bitterness	-0.0613436
	salty-sapidity	0.000628424
	gust.red-fruit	-0.088351
	gust.woody	-0.0370089
	gust.spicy	-0.091149
	gust.full-bodied/viscous	-0.0594555
	gust.cleanness	0.15146
	unpleasant-flavors	-0.102004
	Equation of the model:
	overall-quality = 6.81768827803611+5.25753676986477E-02*clarity+9.33871759077935E-02*color tonality+5.68650143310491E-02*color intensity+0.136084434113238*overall-intensity-0.1126990683915*olf.red-fruit-4.99595245341244E-02*olf.dry-fruit-5.33544485291056E-02*olf.undergrowth-8.94035729040408E-02*olf.spicy-7.48943784467747E-02*olf.woody+3.80096840015458E-03*olf.burning+8.13845951290989E-02*olf.clea…
	Results for variable overall-quality:
	Goodness of fit statistics (Variable overall-quality):
	Observations	13
	Sum of weights	13
	DF	11
	R²	0.880639
	Std. deviation	0.25531
	MSE	0.055155
	RMSE	0.234851
	VIDs (Variable overall-quality):
	Variable	VID	Std. deviation	Lower bound (95%)	Upper bound (95%)
	clarity	0.569429	0.105748	0.339023	0.799835
	color tonality	0.817458	0.0336867	0.744061	0.890854
	color intensity	0.195689	0.100899	-0.0241504	0.415529
	overall-intensity	0.851015	0.0310406	0.783383	0.918646
	olf.red-fruit	-0.36692	0.107758	-0.601705	-0.132134
	olf.dry-fruit	-0.385175	0.0978581	-0.59839	-0.171961
	olf.undergrowth	-0.359264	0.105467	-0.589058	-0.12947
	olf.spicy	-0.870979	0.0321529	-0.941034	-0.800924
	olf.woody	-0.772946	0.0406958	-0.861615	-0.684278
	olf.burning	-0.122544	0.0892944	-0.3171	0.0720114
	olf.cleanness	0.440665	0.0966805	0.230016	0.651314
	unpleasant-odors	0.308216	0.108044	0.0728083	0.543623
	warmness	-0.399934	0.108956	-0.637329	-0.162539
	astringency	-0.850892	0.0121816	-0.877433	-0.824351
	sourness	-0.360206	0.144251	-0.674502	-0.0459104
	sweetness	0.620092	0.107252	0.386411	0.853773
	bitterness	-0.76462	0.0635297	-0.903039	-0.626201
	salty-sapidity	0.158217	0.125144	-0.114448	0.430882
	gust.red-fruit	-0.481867	0.0721413	-0.63905	-0.324685
	gust.woody	-0.533793	0.0854782	-0.720034	-0.347552
	gust.spicy	-0.780541	0.051845	-0.893502	-0.667581
	gust.full-bodied/viscous	-0.783006	0.0744381	-0.945193	-0.620819
	gust.cleanness	0.810691	0.0905375	0.613427	1.00796
	unpleasant-flavors	-0.319355	0.153796	-0.654448	0.0157378
	Coefficients (Variable overall-quality):
	Variable	Coefficient	Std. deviation	Lower bound (95%)	Upper bound (95%)
	Intercept	6.81769	0.460485	5.81438	7.821
	clarity	0.0525754	0.0161708	0.0173421	0.0878086
	color tonality	0.0933872	0.0249763	0.0389685	0.147806
	color intensity	0.056865	0.0517049	-0.0557902	0.16952
	overall-intensity	0.136084	0.0387888	0.051571	0.220598
	olf.red-fruit	-0.112699	0.0767979	-0.280027	0.0546292
	olf.dry-fruit	-0.0499595	0.0372948	-0.131218	0.0312989
	olf.undergrowth	-0.0533544	0.0421277	-0.145143	0.0384338
	olf.spicy	-0.0894036	0.0172027	-0.126885	-0.051922
	olf.woody	-0.0748944	0.0140011	-0.1054	-0.0443886
	olf.burning	0.00380097	0.029902	-0.0613498	0.0689518
	olf.cleanness	0.0813846	0.0573088	-0.0434805	0.20625
	unpleasant-odors	0.0338033	0.0631404	-0.103768	0.171374
	warmness	-0.0338934	0.0367187	-0.113897	0.0461098
	astringency	-0.0827433	0.0208092	-0.128083	-0.0374039
	sourness	-0.106744	0.0672543	-0.253278	0.0397909
	sweetness	0.0681496	0.0291044	0.00473656	0.131563
	bitterness	-0.0613436	0.0121981	-0.087921	-0.0347661
	salty-sapidity	0.000628424	0.0317645	-0.0685805	0.0698373
	gust.red-fruit	-0.088351	0.0560567	-0.210488	0.0337859
	gust.woody	-0.0370089	0.0192518	-0.0789549	0.00493703
	gust.spicy	-0.091149	0.0268501	-0.14965	-0.0326476
	gust.full-bodied/viscous	-0.0594555	0.0110716	-0.0835784	-0.0353326
	gust.cleanness	0.15146	0.0598542	0.0210494	0.281872
	unpleasant-flavors	-0.102004	0.0825162	-0.281791	0.0777839
	Standardized coefficients (Variable overall-quality):
	Variable	Coefficient	Std. deviation	Lower bound (95%)	Upper bound (95%)
	clarity	0.0519404	0.0159755	0.0171327	0.0867481
	color tonality	0.0998734	0.0267111	0.041675	0.158072
	color intensity	0.0416885	0.0379056	-0.0409006	0.124278
	overall-intensity	0.0995419	0.0283729	0.0377227	0.161361
	olf.red-fruit	-0.0579233	0.0394714	-0.143924	0.0280775
	olf.dry-fruit	-0.0381375	0.0284697	-0.100168	0.0238926
	olf.undergrowth	-0.0325042	0.0256647	-0.0884227	0.0234144
	olf.spicy	-0.103593	0.019933	-0.147023	-0.0601625
	olf.woody	-0.0860639	0.0160892	-0.121119	-0.0510086
	olf.burning	0.00326235	0.0256647	-0.0526562	0.0591809
	olf.cleanness	0.0597068	0.0420439	-0.0318989	0.151313
	unpleasant-odors	0.0217183	0.0405671	-0.0666698	0.110106
	warmness	-0.0271836	0.0294496	-0.0913488	0.0369816
	astringency	-0.0912445	0.0229472	-0.141242	-0.0412469
	sourness	-0.0637616	0.0401733	-0.151292	0.0237685
	sweetness	0.0501444	0.021415	0.00348516	0.0968037
	bitterness	-0.0805299	0.0160133	-0.11542	-0.0456398
	salty-sapidity	0.000522008	0.0263856	-0.0569672	0.0580112
	gust.red-fruit	-0.0533399	0.0338429	-0.127077	0.0203975
	gust.woody	-0.0416409	0.0216613	-0.0888367	0.00555493
	gust.spicy	-0.0947844	0.027921	-0.155619	-0.0339498
	gust.full-bodied/viscous	-0.0778035	0.0144883	-0.109371	-0.0462363
	gust.cleanness	0.112294	0.0443764	0.0156062	0.208982
	unpleasant-flavors	-0.0603113	0.0487891	-0.166614	0.0459911
	Predictions and residuals (Variable overall-quality):
	Observation	Weight	overall-quality	Pred(overall-quality)	Residual	Std. residual	Std. dev. on pred. (Mean)	Lower bound 95%(Mean)	Upper bound 95%(Mean)	Std. dev. on pred. (Observation)	Lower bound 95% (Observation)	Upper bound 95% (Observation)
	A_CC_C1	1	5.71429	5.61571	0.0985731	0.151458	0.0963406	5.4058	5.82562	0.272882	5.02115	6.21027
	A_CC_C2	1	5.85714	5.92026	-0.0631214	-0.0969861	0.0775084	5.75139	6.08914	0.266816	5.33892	6.50161
	A_CC_CC1	1	5	5.45267	-0.452671	-0.695529	0.109424	5.21426	5.69108	0.277771	4.84746	6.05788
	A_CC_CC2	1	5.57143	5.67278	-0.101349	-0.155723	0.0921631	5.47197	5.87358	0.271435	5.08137	6.26418
	C1	1	6.42857	5.76127	0.667298	1.0253	0.0862065	5.57345	5.9491	0.269471	5.17415	6.3484
	C2	1	6	6.03856	-0.0385615	-0.0592499	0.0731588	5.87916	6.19796	0.265585	5.4599	6.61722
	D2	1	5.5	5.60482	-0.104818	-0.161054	0.0971646	5.39311	5.81652	0.273174	5.00962	6.20001
	E1	1	6	5.94147	0.0585326	0.0899354	0.0765815	5.77461	6.10832	0.266548	5.36071	6.52223
	E2	1	6.33333	6.23637	0.0969619	0.148982	0.0709002	6.08189	6.39085	0.264972	5.65905	6.8137
	2PN_A	1	7.125	7.19887	-0.0738747	-0.113509	0.131166	6.91309	7.48466	0.287033	6.57348	7.82427
	2PN_B	1	7.375	7.32687	0.0481306	0.0739528	0.143331	7.01458	7.63916	0.292792	6.68893	7.96481
	XPN_A	1	6.75	6.83548	-0.0854848	-0.131348	0.0996211	6.61843	7.05254	0.274058	6.23836	7.4326
	XPN_B	1	7	7.04962	-0.049616	-0.076235	0.117561	6.79347	7.30576	0.281076	6.4372	7.66203
	A1	1	5.85714	5.9068	-0.0496621	-0.0763059	0.0963406	5.6969	6.11671	0.272882	5.31225	6.50136
	A2	1	6	6.15248	-0.152481	-0.234287	0.0775084	5.9836	6.32136	0.266816	5.57114	6.73382
	D1	1	6	5.64494	0.355063	0.545555	0.109424	5.40652	5.88335	0.277771	5.03973	6.25015

## Sheet: olfactory PLS
	Summary statistics:
	Variable	Observations	Obs. with missing data	Obs. without missing data	Minimum	Maximum	Mean	Std. deviation
	olf.red-fruit	13	0	13	4.5	5.85714	5.0989	0.381646
	olf.dry-fruit	13	0	13	4	5.83333	4.78159	0.606468
	olf.undergrowth	13	0	13	2.14286	4.16667	3.23123	0.549131
	olf.spicy	13	0	13	2.375	5.14286	3.9446	0.849998
	olf.woody	13	0	13	3.125	5.28571	4.1337	0.680547
	olf.burning	13	0	13	2.5	5.14286	3.94139	0.711498
	olf.cleanness	13	0	13	6.28571	8	7.23443	0.49888
	unpleasant-odors	13	0	13	1.375	2.875	2.03205	0.44909
	x.2	13	0	13	4457178	382200064	4.47821e+07	1.04363e+08
	x.4	13	0	13	223713	29489115	3.49499e+06	8.06935e+06
	x.5	13	0	13	1591779	42347863	6.54392e+06	1.08131e+07
	x.6	13	0	13	3730151	150291167	1.70614e+07	4.0142e+07
	x.7	13	0	13	4886688	12402097087	2.69289e+09	5.11404e+09
	x.8	13	0	13	113329	854167565	1.85805e+08	3.53269e+08
	x.9	13	0	13	3226880	155801921	2.49454e+07	4.95458e+07
	x.11	13	0	13	1291070	498700279	65671634	1.44951e+08
	x.13	13	0	13	0	6076498	2.7694e+06	1.8372e+06
	x.14	13	0	13	854401	32529086	1.29768e+07	1.04604e+07
	x.15	13	0	13	627054	34419700	5889838	1.01284e+07
	x.17	13	0	13	620060	4871066	2.46085e+06	1.45132e+06
	x.19	13	0	13	2763218	89484070	1.57583e+07	2.61703e+07
	x.23	13	0	13	223827	3235892	922859	758760
	x.24	13	0	13	12050203	165768738	4.08956e+07	5.1207e+07
	x.29	13	0	13	3354	752605	112653	213010
	x.30	13	0	13	117201	660440	317672	135141
	x.38	13	0	13	194207665	4237649750	9.80296e+08	1.1457e+09
	x.40	13	0	13	0	212627	121214	56348.4
	x.45	13	0	13	56161	2568365	445864	857731
	Correlation matrix:
	Variables	x.2	x.4	x.5	x.6	x.7	x.8	x.9	x.11	x.13	x.14	x.15	x.17	x.19	x.23	x.24	x.29	x.30	x.38	x.40	x.45	olf.red-fruit	olf.dry-fruit	olf.undergrowth	olf.spicy	olf.woody	olf.burning	olf.cleanness	unpleasant-odors
	x.2	1	0.985783	-0.0596503	-0.00813052	0.687197	0.734571	0.584787	0.546141	-0.562795	-0.371199	0.301669	-0.343616	0.331167	-0.138443	0.358958	0.412859	0.743295	0.282501	-0.63843	0.762549	-0.30258	-0.387483	-0.0167271	-0.56493	-0.3567	-0.110062	0.325892	0.219579
	x.4	0.985783	1	-0.067711	0.129603	0.716389	0.744648	0.700468	0.466626	-0.57971	-0.273312	0.279256	-0.374066	0.406064	-0.0411555	0.402542	0.536233	0.763282	0.35626	-0.554911	0.681044	-0.310888	-0.3962	0.0269862	-0.629721	-0.368043	-0.137544	0.276356	0.317383
	x.5	-0.0596503	-0.067711	1	-0.0687742	-0.178002	-0.172134	-0.126214	-0.150433	0.555987	0.0205936	-0.189239	0.22551	-0.155288	-0.158644	-0.174353	-0.106154	0.238397	-0.150671	-0.133704	-0.107514	0.570619	-0.376905	-0.544641	0.0593775	-0.169258	0.0664279	0.0523344	-0.121842
	x.6	-0.00813052	0.129603	-0.0687742	1	0.568889	0.465059	0.791164	0.0308537	-0.394985	0.555658	0.420951	-0.375229	0.846947	0.911727	0.732717	0.903928	0.166	0.854609	0.480103	-0.090572	-0.031994	-0.161824	-0.106002	-0.55723	-0.357673	-0.130551	-0.12525	0.547335
	x.7	0.687197	0.716389	-0.178002	0.568889	1	0.992503	0.798651	0.765962	-0.822568	-0.030574	0.828792	-0.612695	0.898055	0.577779	0.923971	0.782243	0.498052	0.872249	-0.179827	0.75832	-0.271471	-0.310287	-0.226267	-0.785975	-0.630167	-0.188578	0.326134	0.362483
	x.8	0.734571	0.744648	-0.172134	0.465059	0.992503	1	0.737189	0.825442	-0.822707	-0.11589	0.836872	-0.604532	0.843882	0.490967	0.890157	0.705477	0.507266	0.815359	-0.262147	0.831867	-0.279069	-0.310159	-0.239503	-0.762175	-0.631132	-0.183194	0.374152	0.302602
	x.9	0.584787	0.700468	-0.126214	0.791164	0.798651	0.737189	1	0.228547	-0.616115	0.259956	0.395256	-0.468734	0.81316	0.601757	0.715105	0.971439	0.579555	0.787891	0.0246988	0.286247	-0.233845	-0.340428	0.0116541	-0.761109	-0.423906	-0.177456	0.0323247	0.616019
	x.11	0.546141	0.466626	-0.150433	0.0308537	0.765962	0.825442	0.228547	1	-0.672745	-0.379644	0.892154	-0.50445	0.553384	0.229631	0.701133	0.213577	0.211586	0.531843	-0.362745	0.949678	-0.204338	-0.12884	-0.345874	-0.478627	-0.569289	-0.141027	0.529599	-0.0848029
	x.13	-0.562795	-0.57971	0.555987	-0.394985	-0.822568	-0.822707	-0.616115	-0.672745	1	0.0884784	-0.720439	0.648817	-0.709799	-0.473446	-0.753503	-0.580984	-0.297344	-0.6876	0.242924	-0.659479	0.509756	0.188849	-0.033283	0.580218	0.509785	0.148878	-0.275047	-0.315325
	x.14	-0.371199	-0.273312	0.0205936	0.555658	-0.030574	-0.11589	0.259956	-0.379644	0.0884784	1	-0.0704649	0.373966	0.262743	0.602861	0.15012	0.350958	0.0721049	0.331146	0.479543	-0.481889	0.302061	-0.25331	-0.0527271	0.088096	0.239524	0.0232577	-0.698894	0.562244
	x.15	0.301669	0.279256	-0.189239	0.420951	0.828792	0.836872	0.395256	0.892154	-0.720439	-0.0704649	1	-0.581665	0.809083	0.629021	0.908476	0.462804	0.0788739	0.799739	-0.0307628	0.739388	-0.18339	-0.0853265	-0.343805	-0.580899	-0.634443	-0.191094	0.397347	0.0923817
	x.17	-0.343616	-0.374066	0.22551	-0.375229	-0.612695	-0.604532	-0.468734	-0.50445	0.648817	0.373966	-0.581665	1	-0.577734	-0.328371	-0.593996	-0.457863	0.0921066	-0.51063	-0.113697	-0.456025	0.328741	-0.18982	-0.105817	0.684706	0.657688	0.392822	-0.707561	-0.0420494
	x.19	0.331167	0.406064	-0.155288	0.846947	0.898055	0.843882	0.81316	0.553384	-0.709799	0.262743	0.809083	-0.577734	1	0.86607	0.979164	0.886284	0.294378	0.993563	0.176259	0.442654	-0.162231	-0.229317	-0.24684	-0.732782	-0.591964	-0.179789	0.161396	0.443353
	x.23	-0.138443	-0.0411555	-0.158644	0.911727	0.577779	0.490967	0.601757	0.229631	-0.473446	0.602861	0.629021	-0.328371	0.86607	1	0.81331	0.749508	0.0216213	0.893234	0.481094	0.0256704	-0.00381465	-0.124965	-0.200805	-0.467319	-0.367638	-0.149287	-0.143636	0.484466
	x.24	0.358958	0.402542	-0.174353	0.732717	0.923971	0.890157	0.715105	0.701133	-0.753503	0.15012	0.908476	-0.593996	0.979164	0.81331	1	0.786847	0.266826	0.972713	0.0882778	0.578473	-0.173381	-0.210565	-0.30774	-0.709075	-0.62252	-0.173765	0.250441	0.33248
	x.29	0.412859	0.536233	-0.106154	0.903928	0.782243	0.705477	0.971439	0.213577	-0.580984	0.350958	0.462804	-0.457863	0.886284	0.749508	0.786847	1	0.476922	0.873458	0.161472	0.204839	-0.157559	-0.30692	-0.0913079	-0.715762	-0.441359	-0.137038	0.00555941	0.575485
	x.30	0.743295	0.763282	0.238397	0.166	0.498052	0.507266	0.579555	0.211586	-0.297344	0.0721049	0.0788739	0.0921066	0.294378	0.0216213	0.266826	0.476922	1	0.309753	-0.556247	0.409369	0.0343622	-0.806803	-0.339652	-0.253064	-0.0833128	0.260539	-0.14932	0.341009
	x.38	0.282501	0.35626	-0.150671	0.854609	0.872249	0.815359	0.787891	0.531843	-0.6876	0.331146	0.799739	-0.51063	0.993563	0.893234	0.972713	0.873458	0.309753	1	0.199457	0.408964	-0.111784	-0.274951	-0.299659	-0.665274	-0.534718	-0.122747	0.093102	0.450051
	x.40	-0.63843	-0.554911	-0.133704	0.480103	-0.179827	-0.262147	0.0246988	-0.362745	0.242924	0.479543	-0.0307628	-0.113697	0.176259	0.481094	0.0882778	0.161472	-0.556247	0.199457	1	-0.56609	0.227026	0.491002	0.202982	-0.0439226	0.267009	-0.254429	-0.119681	0.115213
	x.45	0.762549	0.681044	-0.107514	-0.090572	0.75832	0.831867	0.286247	0.949678	-0.659479	-0.481889	0.739388	-0.456025	0.442654	0.0256704	0.578473	0.204839	0.409369	0.408964	-0.56609	1	-0.249639	-0.231136	-0.278138	-0.49266	-0.528955	-0.117933	0.530696	-0.0573286
	olf.red-fruit	-0.30258	-0.310888	0.570619	-0.031994	-0.271471	-0.279069	-0.233845	-0.204338	0.509756	0.302061	-0.18339	0.328741	-0.162231	-0.00381465	-0.173381	-0.157559	0.0343622	-0.111784	0.227026	-0.249639	1	-0.034525	-0.609168	0.308224	0.13992	-0.144347	0.0764976	-0.315029
	olf.dry-fruit	-0.387483	-0.3962	-0.376905	-0.161824	-0.310287	-0.310159	-0.340428	-0.12884	0.188849	-0.25331	-0.0853265	-0.18982	-0.229317	-0.124965	-0.210565	-0.30692	-0.806803	-0.274951	0.491002	-0.231136	-0.034525	1	0.493624	-0.0482882	0.125457	-0.569401	0.384716	-0.389969
	olf.undergrowth	-0.0167271	0.0269862	-0.544641	-0.106002	-0.226267	-0.239503	0.0116541	-0.345874	-0.033283	-0.0527271	-0.343805	-0.105817	-0.24684	-0.200805	-0.30774	-0.0913079	-0.339652	-0.299659	0.202982	-0.278138	-0.609168	0.493624	1	-0.171309	0.291583	-0.309246	-0.169289	0.27374
	olf.spicy	-0.56493	-0.629721	0.0593775	-0.55723	-0.785975	-0.762175	-0.761109	-0.478627	0.580218	0.088096	-0.580899	0.684706	-0.732782	-0.467319	-0.709075	-0.715762	-0.253064	-0.665274	-0.0439226	-0.49266	0.308224	-0.0482882	-0.171309	1	0.585176	0.596731	-0.402045	-0.415185
	olf.woody	-0.3567	-0.368043	-0.169258	-0.357673	-0.630167	-0.631132	-0.423906	-0.569289	0.509785	0.239524	-0.634443	0.657688	-0.591964	-0.367638	-0.62252	-0.441359	-0.0833128	-0.534718	0.267009	-0.528955	0.13992	0.125457	0.291583	0.585176	1	0.299125	-0.513985	-0.153125
	olf.burning	-0.110062	-0.137544	0.0664279	-0.130551	-0.188578	-0.183194	-0.177456	-0.141027	0.148878	0.0232577	-0.191094	0.392822	-0.179789	-0.149287	-0.173765	-0.137038	0.260539	-0.122747	-0.254429	-0.117933	-0.144347	-0.569401	-0.309246	0.596731	0.299125	1	-0.451079	-0.111429
	olf.cleanness	0.325892	0.276356	0.0523344	-0.12525	0.326134	0.374152	0.0323247	0.529599	-0.275047	-0.698894	0.397347	-0.707561	0.161396	-0.143636	0.250441	0.00555941	-0.14932	0.093102	-0.119681	0.530696	0.0764976	0.384716	-0.169289	-0.402045	-0.513985	-0.451079	1	-0.547401
	unpleasant-odors	0.219579	0.317383	-0.121842	0.547335	0.362483	0.302602	0.616019	-0.0848029	-0.315325	0.562244	0.0923817	-0.0420494	0.443353	0.484466	0.33248	0.575485	0.341009	0.450051	0.115213	-0.0573286	-0.315029	-0.389969	0.27374	-0.415185	-0.153125	-0.111429	-0.547401	1
	Model quality:
	Statistic	Comp1	Comp2	Comp3	Comp4
	Q² cum	0.0781662	0.133009	0.098324	0.119579
	R²Y cum	0.194506	0.344493	0.447067	0.546479
	R²X cum	0.530947	0.687078	0.833915	0.916142
	Correlation matrix of the variables with the t and u~ components:
		t1	t2	t3	t4	u~1	u~2	u~3	u~4
	x.2	-0.651061	-0.211246	0.515299	-0.463898	-0.607525	-0.111006	0.0365012	-0.0410114
	x.4	-0.691496	-0.0897845	0.438002	-0.501008	-0.652289	-0.0609384	0.00733447	-0.0922751
	x.5	0.186902	0.21919	0.534264	0.563609	-0.0515412	0.176103	0.500551	0.578854
	x.6	-0.622796	0.602247	-0.438864	0.144199	-0.524826	0.220574	-0.0017071	-0.0176093
	x.7	-0.994862	-0.0282455	0.0575171	0.0019524	-0.848063	-0.115608	0.027296	0.1045
	x.8	-0.978841	-0.121745	0.128184	-0.00299441	-0.836123	-0.159835	0.0355874	0.127596
	x.9	-0.824817	0.412987	-0.0738218	-0.281028	-0.733704	0.149022	-0.0312191	-0.138449
	x.11	-0.726587	-0.525746	0.205927	0.250762	-0.601382	-0.380456	0.0492374	0.301179
	x.13	0.840728	0.199075	0.134617	0.259697	0.676606	0.182338	0.12558	0.139209
	x.14	0.00674099	0.875005	-0.200896	0.119153	0.131984	0.717653	0.212041	-0.105692
	x.15	-0.820456	-0.254386	-0.104444	0.409705	-0.67767	-0.279446	0.00395195	0.266584
	x.17	0.652492	0.438765	0.426085	-0.0028759	0.720989	0.615634	0.390655	-0.023313
	x.19	-0.921021	0.233809	-0.232984	0.196438	-0.769196	0.00211182	0.0229135	0.111554
	x.23	-0.621018	0.486015	-0.456434	0.348017	-0.474864	0.207953	0.0282414	0.0575832
	x.24	-0.936167	0.0799524	-0.172439	0.26282	-0.767497	-0.0871141	0.0393213	0.179855
	x.29	-0.817343	0.481909	-0.182224	-0.11199	-0.697045	0.164094	0.0191015	-0.0461102
	x.30	-0.477952	0.347117	0.707782	-0.290938	-0.330277	0.463176	0.554944	0.127138
	x.38	-0.89492	0.292635	-0.21976	0.226453	-0.708213	0.0815092	0.0964941	0.138277
	x.40	0.141797	0.331815	-0.804418	0.265363	0.189276	0.00673099	-0.353637	-0.132235
	x.45	-0.710187	-0.537	0.401132	0.029022	-0.613017	-0.348412	0.0716095	0.235584
	olf.red-fruit	0.278761	0.307169	0.203799	0.468277	0.299727	0.124604	0.401362	0.745889
	olf.dry-fruit	0.307462	-0.419044	-0.659895	-0.0251878	0.198983	-0.694222	-0.826029	-0.194543
	olf.undergrowth	0.212371	-0.123331	-0.460034	-0.633078	0.0769745	-0.152096	-0.800787	-0.90929
	olf.spicy	0.794938	0.0427537	0.14812	0.0486242	0.892041	0.314994	0.429633	0.142836
	olf.woody	0.648841	0.246831	-0.0180023	-0.295134	0.849977	0.367867	0.019175	-0.345997
	olf.burning	0.191958	0.168323	0.312196	0.00251676	0.42505	0.50135	0.709604	0.0379292
	olf.cleanness	-0.324267	-0.712541	-0.0760922	0.148618	-0.416622	-0.896555	-0.293681	0.446892
	unpleasant-odors	-0.379195	0.56208	-0.0802721	-0.251055	-0.443934	0.601676	-0.0497086	-0.502369
	w vectors:
	Variable	w1	w2	w3	w4
	x.2	-0.218097	-0.0279147	0.102958	-0.363587
	x.4	-0.234163	0.0148132	0.0277685	-0.388231
	x.5	-0.0184855	0.120923	0.442311	0.525817
	x.6	-0.188384	0.228439	-0.232292	0.143195
	x.7	-0.304445	-0.000471755	0.0206783	-0.0145698
	x.8	-0.300162	-0.0364467	0.0636124	-0.0222491
	x.9	-0.263373	0.190774	-0.197657	-0.200392
	x.11	-0.215912	-0.231462	0.229502	0.153536
	x.13	0.242902	0.0665804	0.0728186	0.229341
	x.14	0.0474362	0.559856	-0.0989626	0.0303324
	x.15	-0.24329	-0.144139	0.0820848	0.254962
	x.17	0.258869	0.421999	0.256537	-0.096377
	x.19	-0.276124	0.0847865	-0.0779425	0.148485
	x.23	-0.170449	0.218443	-0.158884	0.233527
	x.24	-0.275521	0.0164939	-0.00516214	0.191973
	x.29	-0.250211	0.201898	-0.170451	-0.0339479
	x.30	-0.118524	0.405052	0.439765	-0.170911
	x.38	-0.254226	0.144462	-0.0226776	0.18378
	x.40	0.0679449	-0.00770054	-0.484563	0.224018
	x.45	-0.220087	-0.207917	0.257026	-0.00921253
	w* vectors:
	Variable	w*1	w*2	w*3	w*4
	x.2	-0.218097	-0.0401823	0.0942791	-0.311938
	x.4	-0.234163	0.00164185	0.0347823	-0.370397
	x.5	-0.0184855	0.119883	0.486538	0.707626
	x.6	-0.188384	0.217843	-0.147686	0.0374989
	x.7	-0.304445	-0.0175964	0.0226015	0.00314622
	x.8	-0.300162	-0.0533304	0.0523862	0.0155531
	x.9	-0.263373	0.175959	-0.126271	-0.287116
	x.11	-0.215912	-0.243607	0.146576	0.270039
	x.13	0.242902	0.0802433	0.0954284	0.249519
	x.14	0.0474362	0.562524	0.104886	-0.0437948
	x.15	-0.24329	-0.157823	0.0311928	0.304853
	x.17	0.258869	0.43656	0.408655	-0.0181097
	x.19	-0.276124	0.0692549	-0.0451212	0.118802
	x.23	-0.170449	0.208855	-0.0780462	0.159039
	x.24	-0.275521	0.000996148	0.00274919	0.196935
	x.29	-0.250211	0.187824	-0.0950981	-0.110109
	x.30	-0.118524	0.398385	0.588301	-0.00283729
	x.38	-0.254226	0.130162	0.0317563	0.173662
	x.40	0.0679449	-0.00387872	-0.487839	0.0166045
	x.45	-0.220087	-0.220297	0.182714	0.117814
	c vectors:
	Variable	c1	c2	c3	c4
	olf.red-fruit	0.0861874	0.190184	0.132608	0.372192
	olf.dry-fruit	0.0950612	-0.259452	-0.429382	-0.0200196
	olf.undergrowth	0.0656609	-0.0763609	-0.299336	-0.503178
	olf.spicy	0.245779	0.0264711	0.0963791	0.0386471
	olf.woody	0.200609	0.152826	-0.0117138	-0.234576
	olf.burning	0.0593496	0.104217	0.203141	0.00200035
	olf.cleanness	-0.100257	-0.441172	-0.0495118	0.118123
	unpleasant-odors	-0.11724	0.348013	-0.0522316	-0.199542
	p vectors:
	Variable	p1	p2	p3	p4
	x.2	-0.201296	-0.130794	0.335296	-0.368712
	x.4	-0.213797	-0.0555903	0.285	-0.398207
	x.5	0.0577865	0.135712	0.347636	0.447963
	x.6	-0.192557	0.372883	-0.285561	0.114611
	x.7	-0.307592	-0.0174883	0.0374254	0.00155179
	x.8	-0.302639	-0.0753789	0.0834072	-0.00237999
	x.9	-0.255017	0.255702	-0.0480345	-0.223364
	x.11	-0.224647	-0.325517	0.133993	0.199308
	x.13	0.259937	0.123258	0.0875929	0.20641
	x.14	0.00208418	0.541762	-0.130719	0.0947045
	x.15	-0.253669	-0.157504	-0.0679597	0.325639
	x.17	0.201738	0.271663	0.277246	-0.0022858
	x.19	-0.284762	0.144764	-0.151599	0.156131
	x.23	-0.192007	0.300918	-0.296994	0.276608
	x.24	-0.289445	0.0495027	-0.112203	0.208893
	x.29	-0.252707	0.298375	-0.11857	-0.0890114
	x.30	-0.147774	0.214918	0.460541	-0.231241
	x.38	-0.276692	0.181186	-0.142994	0.179988
	x.40	0.043841	0.205444	-0.52342	0.210914
	x.45	-0.219576	-0.332485	0.261009	0.0230671
	Scores on t:
	Observation	t1	t2	t3	t4
	A1	1.49006	0.672651	1.23175	-0.480416
	A2	1.76904	1.36917	2.56527	2.63212
	A_CC_C1	2.19362	1.30683	0.3223	-0.204428
	A_CC_CC1	2.0682	1.37958	0.482425	-0.316213
	A_CC_CC2	1.34017	0.525265	0.0857428	-0.425573
	C1	1.60989	-1.10745	-1.01065	-0.289174
	C2	1.75824	-0.745469	-0.578503	-0.157358
	D2	1.61521	-0.481824	-1.30863	-0.299367
	E1	1.58242	-0.782805	-1.0656	-0.18937
	E2	1.41336	-1.49404	-1.36965	-0.388203
	2PN_A	-5.28983	-0.726123	2.80977	-2.48337
	2PN_B	-6.72804	3.18049	-2.42082	0.41224
	XPN_B	-4.82233	-3.09627	0.256587	2.18911
	A_CC_C2	1.70532	1.53682	0.540393	-0.234904
	D1	1.61939	-0.832014	-1.74032	-0.211902
	XPN_A	-7.61637	-1.07729	0.598244	-1.85818
	Standardized scores on t:
	Observation	t1	t2	t3	t4
	A1	0.132992	0.120226	0.231367	-0.110228
	A2	0.157892	0.244717	0.48185	0.603919
	A_CC_C1	0.195786	0.233575	0.0605394	-0.0469044
	A_CC_CC1	0.184592	0.246579	0.0906166	-0.0725528
	A_CC_CC2	0.119614	0.0938827	0.0161056	-0.0976444
	C1	0.143687	-0.197938	-0.189835	-0.0663488
	C2	0.156928	-0.133241	-0.108664	-0.0361046
	D2	0.144162	-0.0861184	-0.245807	-0.0686875
	E1	0.141235	-0.139914	-0.200159	-0.0434495
	E2	0.126146	-0.267036	-0.257269	-0.0890702
	2PN_A	-0.472132	-0.129783	0.527776	-0.56979
	2PN_B	-0.600496	0.568462	-0.454716	0.0945854
	XPN_B	-0.430407	-0.553409	0.0481963	0.502276
	A_CC_C2	0.152205	0.274682	0.101505	-0.053897
	D1	0.144535	-0.148709	-0.326894	-0.0486193
	XPN_A	-0.679782	-0.192549	0.112372	-0.426344
	Scores on u:
	Observation	u1	u2	u3	u4
	A1	3.6491	0.845916	2.79264	0.365079
	A2	-0.642438	1.22816	3.64752	3.08552
	A_CC_C1	4.65141	2.77555	-0.152632	-2.64341
	A_CC_CC1	2.10703	1.73583	-1.07121	-0.0474559
	A_CC_CC2	2.21372	2.8192	1.92765	-0.801634
	C1	2.86067	-1.57859	0.19879	-0.045478
	C2	1.67369	-0.867278	-0.328306	0.449389
	D2	3.18812	-2.41168	-0.627459	2.80039
	E1	-0.218553	-2.67281	-4.79239	-1.51899
	E2	-2.83464	-1.59199	-2.1187	-1.60146
	2PN_A	-6.04797	0.118901	0.546496	-2.37246
	2PN_B	-6.42714	1.97016	-2.09091	0.480542
	XPN_B	-4.17301	-2.37138	2.06851	1.84996
	Scores on u~:
	Observation	u~1	u~2	u~3	u~4
	A1	3.6491	0.954413	3.13141	0.763306
	A2	-0.642438	1.35697	4.35367	3.99387
	A_CC_C1	4.65141	2.93527	0.514735	-2.73646
	A_CC_CC1	2.10703	1.88643	-0.36344	-0.0692498
	A_CC_CC2	2.21372	2.91678	2.18987	-0.884455
	C1	2.86067	-1.46137	-0.412297	-0.488136
	C2	1.67369	-0.739254	-0.74851	0.157395
	D2	3.18812	-2.29407	-0.905339	2.17491
	E1	-0.218553	-2.55759	-5.23017	-2.01113
	E2	-2.83464	-1.48907	-2.93316	-2.15795
	2PN_A	-6.04797	-0.266272	0.229126	-0.778841
	2PN_B	-6.42714	1.48027	-0.308296	-0.459009
	XPN_B	-4.17301	-2.72251	0.482393	2.49574
	Q² quality index:
	Component	Comp1	Comp2	Comp3	Comp4
	olf.red-fruit	0.0190838	-0.00416862	-0.226077	0.124805
	olf.dry-fruit	-0.002955	0.0988885	0.457977	-0.0238393
	olf.undergrowth	-0.0276362	-0.234475	-0.155446	0.32077
	olf.spicy	0.488681	-0.0843448	-0.0482499	-0.253762
	olf.woody	0.34486	0.0211233	-0.163635	0.00928624
	olf.burning	-0.0159179	-0.0474373	0.0164523	-0.073877
	olf.cleanness	-0.0522506	0.476805	-0.0952905	-0.253279
	unpleasant-odors	-0.128534	0.186182	-0.160754	0.0386202
	Total	0.0781662	0.0594933	-0.0400064	0.0235724
	Cumulative Q² quality index:
	Component	Comp1	Comp2	Comp3	Comp4
	olf.red-fruit	0.0190838	0.0149947	-0.207693	-0.0569666
	olf.dry-fruit	-0.002955	0.0962257	0.510134	0.498455
	olf.undergrowth	-0.0276362	-0.268592	-0.465789	0.00439127
	olf.spicy	0.488681	0.445554	0.418802	0.271315
	olf.woody	0.34486	0.358698	0.253759	0.260689
	olf.burning	-0.0159179	-0.0641103	-0.0466032	-0.123923
	olf.cleanness	-0.0522506	0.449468	0.397008	0.244282
	unpleasant-odors	-0.128534	0.0815783	-0.0660621	-0.0248906
	Total	0.0781662	0.133009	0.098324	0.119579
	Variable Importance in the Projection (VIP):
	Variable	VIP(1)	Standard deviation	Lower bound(95%)	Upper bound(95%)	VIP(2)	Standard deviation	Lower bound(95%)	Upper bound(95%)	VIP(3)	Standard deviation	Lower bound(95%)	Upper bound(95%)	VIP(4)	Standard deviation	Lower bound(95%)	Upper bound(95%)
	x.30	0.530054	0.608523	-0.795803	1.85591	1.25987	0.893389	-0.686654	3.2064	1.45277	0.635417	0.0683135	2.83722	1.35384	0.55935	0.135118	2.57256
	x.5	0.0826698	0.209626	-0.374065	0.539405	0.362196	1.25575	-2.37385	3.09824	0.999412	1.39118	-2.0317	4.03053	1.3502	1.50903	-1.9377	4.6381
	x.14	0.212141	0.945062	-1.84697	2.27125	1.65974	0.289444	1.02909	2.29038	1.47229	0.189602	1.05918	1.8854	1.33291	0.189533	0.919957	1.74587
	x.17	1.1577	0.488548	0.093245	2.22215	1.51902	0.538745	0.345196	2.69285	1.44222	0.421882	0.523021	2.36142	1.31735	0.420596	0.400954	2.23375
	x.40	0.303859	0.583234	-0.966899	1.57462	0.22945	0.698726	-1.29294	1.75184	1.05736	0.38685	0.214487	1.90024	1.04748	0.306636	0.379377	1.71558
	x.9	1.17784	0.596048	-0.120838	2.47651	1.04891	0.503572	-0.0482817	2.14609	1.01344	0.283966	0.394727	1.63214	0.993136	0.278674	0.385958	1.60031
	x.4	1.04721	0.598096	-0.255933	2.35035	0.788094	0.464549	-0.224071	1.80026	0.694355	0.437207	-0.258237	1.64695	0.970977	0.538894	-0.203172	2.14513
	x.11	0.96559	0.577651	-0.293003	2.22418	0.996463	0.562734	-0.229629	2.22256	1.0034	0.499093	-0.0840269	2.09083	0.95364	0.487994	-0.109608	2.01689
	x.2	0.975359	0.647312	-0.435012	2.38573	0.737508	0.469337	-0.28509	1.76011	0.683934	0.444698	-0.28498	1.65285	0.92932	0.489743	-0.137738	1.99638
	x.45	0.984257	0.643087	-0.416909	2.38542	0.960941	0.479989	-0.0848643	2.00675	1.00732	0.361489	0.2197	1.79493	0.911268	0.317668	0.219129	1.60341
	x.6	0.842478	0.820394	-0.945007	2.62996	0.924745	0.654259	-0.500764	2.35025	0.952133	0.520039	-0.180936	2.0852	0.903462	0.432699	-0.0393078	1.84623
	x.15	1.08803	0.388236	0.242135	1.93392	0.921578	0.389451	0.0730362	1.77012	0.827866	0.347272	0.0712258	1.58451	0.892857	0.385192	0.0535964	1.73212
	x.29	1.11898	0.618325	-0.228236	2.46619	1.03049	0.519101	-0.100532	2.16151	0.975494	0.401862	0.0999127	1.85108	0.884689	0.365737	0.0878156	1.68156
	x.23	0.762273	0.817102	-1.01804	2.54259	0.862313	0.582166	-0.406119	2.13074	0.829949	0.524033	-0.311821	1.97172	0.872882	0.34274	0.126116	1.61965
	x.38	1.13693	0.489418	0.0705857	2.20328	0.954755	0.382233	0.121941	1.78757	0.839507	0.338054	0.102952	1.57606	0.83633	0.268474	0.251376	1.42128
	x.19	1.23487	0.431355	0.295023	2.17471	0.961028	0.381493	0.129825	1.79223	0.859971	0.359966	0.0756721	1.64427	0.827787	0.297001	0.180677	1.4749
	x.24	1.23217	0.313643	0.5488	1.91554	0.927142	0.276111	0.325547	1.52874	0.813936	0.238403	0.2945	1.33337	0.822228	0.213731	0.356548	1.28791
	x.8	1.34237	0.158225	0.997623	1.68711	1.01438	0.234766	0.502872	1.5259	0.900809	0.241758	0.374064	1.42755	0.81587	0.220048	0.336427	1.29531
	x.7	1.36152	0.129867	1.07856	1.64448	1.02306	0.230075	0.521769	1.52435	0.899151	0.247363	0.360193	1.43811	0.813739	0.226283	0.320711	1.30677
	x.13	1.08629	0.15988	0.737941	1.43464	0.839561	0.201524	0.400477	1.27864	0.753308	0.218173	0.277949	1.22867	0.809695	0.187582	0.400989	1.2184
	Model parameters:
	Variable	olf.red-fruit	olf.dry-fruit	olf.undergrowth	olf.spicy	olf.woody	olf.burning	olf.cleanness	unpleasant-odors
	Intercept	4.68021	5.7408	3.99586	3.98123	4.21799	3.55006	7.7709	1.65957
	x.2	-4.75538e-10	-2.58852e-10	6.18189e-10	-4.69428e-10	1.44608e-10	9.51907e-12	-9.18808e-12	2.96514e-10
	x.4	-7.24174e-09	-2.27015e-09	1.09198e-08	-7.21254e-09	3.3528e-09	-6.52619e-10	-1.4048e-09	5.57192e-09
	x.5	1.23213e-08	-1.43547e-08	-2.60048e-08	5.72817e-09	-9.88609e-09	7.34639e-09	3.90411e-10	-5.09703e-09
	x.6	1.86026e-10	-1.77747e-10	-5.01373e-11	-1.12902e-09	-1.96082e-10	-3.26192e-10	-8.13748e-10	1.09783e-09
	x.7	-1.89685e-12	-4.049e-12	-2.89865e-12	-1.21319e-11	-8.61874e-12	-2.12933e-12	3.66191e-12	2.43783e-12
	x.8	-2.5147e-11	-6.43812e-11	-6.08459e-11	-1.67309e-10	-1.39912e-10	-2.55775e-11	7.46545e-11	1.37186e-11
	x.9	-8.69206e-10	-1.31259e-10	1.67954e-09	-1.42976e-09	5.89067e-10	-3.37729e-10	-7.94314e-10	1.41401e-09
	x.11	1.44823e-10	-1.07375e-10	-6.64211e-10	-2.04961e-10	-6.83618e-10	-3.87124e-11	5.29197e-10	-3.74899e-10
	x.13	2.94398e-08	-1.44253e-08	-4.31295e-08	3.73204e-08	4.97299e-10	1.65224e-08	-9.50525e-09	-1.3524e-08
	x.14	3.96518e-09	-1.07605e-08	-2.5828e-09	2.84127e-09	6.80057e-09	5.62232e-09	-1.2557e-08	8.30589e-09
	x.15	2.51014e-09	-1.00385e-10	-9.03554e-09	-4.12775e-09	-9.72954e-09	-1.68179e-09	6.32857e-09	-3.94008e-09
	x.17	4.01779e-08	-1.1022e-07	-4.90178e-08	6.66885e-08	5.53837e-08	7.05158e-08	-8.28155e-08	3.21341e-08
	x.19	4.02592e-10	-6.30821e-10	-1.46233e-09	-2.13682e-09	-1.8762e-09	-4.92051e-10	2.55394e-10	6.02755e-10
	x.23	3.71576e-08	-3.20222e-08	-6.06502e-08	-4.2278e-08	-3.46819e-08	-3.64391e-09	-3.44539e-08	3.84773e-08
	x.24	3.73435e-10	-3.73932e-10	-1.2663e-09	-9.92888e-10	-1.34693e-09	-2.12529e-10	4.90142e-10	-5.95636e-11
	x.29	-7.06574e-08	-8.39307e-08	1.36888e-07	-2.79113e-07	1.74205e-08	-4.94818e-08	-1.54751e-07	2.56451e-07
	x.30	4.02453e-07	-1.64777e-06	-8.64997e-07	2.39042e-07	1.55511e-07	8.10717e-07	-7.13712e-07	4.06675e-07
	x.38	2.38808e-11	-3.97272e-11	-5.9203e-11	-3.65504e-11	-4.28968e-11	3.27605e-12	-5.65838e-12	1.52057e-11
	x.40	-3.61629e-07	2.33125e-06	1.38802e-06	-4.49207e-07	1.79435e-07	-1.20508e-06	1.86051e-07	1.02426e-07
	x.45	3.20946e-09	-3.15194e-08	-7.145e-08	-3.74208e-08	-8.53688e-08	1.10454e-09	7.2194e-08	-4.39365e-08
	Equation of the model:
	olf.red-fruit = 4.68021031576131-4.75537967819567E-10*x.2-7.24173561441264E-09*x.4+1.23213350656231E-08*x.5+1.8602574206015E-10*x.6-1.89685040390986E-12*x.7-2.51469785374902E-11*x.8-8.69205896652247E-10*x.9+1.44822927166372E-10*x.11+2.94398041400793E-08*x.13+3.96517605992959E-09*x.14+2.51014243949217E-09*x.15+4.01779424802929E-08*x.17+4.02591914085579E-10*x.19+3.71575933954154E-08*x.23+3.73434638…
	olf.dry-fruit = 5.74080206702075-2.58852133051826E-10*x.2-2.27014974174482E-09*x.4-1.43546519967919E-08*x.5-1.77746549691249E-10*x.6-4.04899613421571E-12*x.7-6.43811548360599E-11*x.8-1.31259136189622E-10*x.9-1.07375010775564E-10*x.11-1.44253261901785E-08*x.13-1.07605150671658E-08*x.14-1.00384542162206E-10*x.15-1.10219916811807E-07*x.17-6.30821347780333E-10*x.19-3.20222136606239E-08*x.23-3.7393246…
	olf.undergrowth = 3.99585666489502+6.18188942397702E-10*x.2+1.09197711856232E-08*x.4-2.60048023808248E-08*x.5-5.01372857886662E-11*x.6-2.89864667017547E-12*x.7-6.08459492088089E-11*x.8+1.67954299258052E-09*x.9-6.64211266914733E-10*x.11-4.31295074580496E-08*x.13-2.58280060057158E-09*x.14-9.03554032448457E-09*x.15-4.90177815311011E-08*x.17-1.46233080561668E-09*x.19-6.06502300033255E-08*x.23-1.26629…
	olf.spicy = 3.98122730856362-4.69427933799629E-10*x.2-7.21254064528616E-09*x.4+5.7281650933072E-09*x.5-1.12901601003103E-09*x.6-1.21319379466573E-11*x.7-1.67308566080421E-10*x.8-1.42976202821152E-09*x.9-2.04961363623635E-10*x.11+3.732044649503E-08*x.13+2.84126698617438E-09*x.14-4.12775025921803E-09*x.15+6.6688545524952E-08*x.17-2.1368172396797E-09*x.19-4.22780239682176E-08*x.23-9.92888308087267E-…
	olf.woody = 4.21799348577372+1.44607915558472E-10*x.2+3.35280410147084E-09*x.4-9.88608603773362E-09*x.5-1.96081699194366E-10*x.6-8.61873537642239E-12*x.7-1.39911659993068E-10*x.8+5.89067436229156E-10*x.9-6.83617545954411E-10*x.11+4.97298924190389E-10*x.13+6.80057444865214E-09*x.14-9.72953531011632E-09*x.15+5.53836962321505E-08*x.17-1.87619551359083E-09*x.19-3.4681924000267E-08*x.23-1.346932439041…
	olf.burning = 3.55005903636739+9.51906922406462E-12*x.2-6.52618693334674E-10*x.4+7.34638969936768E-09*x.5-3.26191954444403E-10*x.6-2.12932501412625E-12*x.7-2.5577468204383E-11*x.8-3.37729450287651E-10*x.9-3.87124145939739E-11*x.11+1.65223995360946E-08*x.13+5.62232305588903E-09*x.14-1.68178595869228E-09*x.15+7.05158139719293E-08*x.17-4.92050663412509E-10*x.19-3.64391180610158E-09*x.23-2.1252921328…
	olf.cleanness = 7.77089981222016-9.18808069747984E-12*x.2-1.40480439385126E-09*x.4+3.90410538689201E-10*x.5-8.13748100988005E-10*x.6+3.66190852453037E-12*x.7+7.46545310928657E-11*x.8-7.94313568818862E-10*x.9+5.2919723914626E-10*x.11-9.50525345733684E-09*x.13-1.25569597623688E-08*x.14+6.32857251616389E-09*x.15-8.28154796346257E-08*x.17+2.55393920951813E-10*x.19-3.44538889210867E-08*x.23+4.90141756…
	unpleasant-odors = 1.65957255842709+2.965135827358E-10*x.2+5.57191592618576E-09*x.4-5.09703103157172E-09*x.5+1.09782615457682E-09*x.6+2.43782820794473E-12*x.7+1.37186245674443E-11*x.8+1.41401227540801E-09*x.9-3.74899000066718E-10*x.11-1.3524023157633E-08*x.13+8.30589072800994E-09*x.14-3.94007988015589E-09*x.15+3.21340777666281E-08*x.17+6.02754968111034E-10*x.19+3.84772753916291E-08*x.23-5.9563613…
	Results for variable olf.red-fruit:
	Goodness of fit statistics (Variable olf.red-fruit):
	Observations	13
	Sum of weights	13
	DF	8
	R²	0.432877
	Std. deviation	0.352002
	MSE	0.0762493
	RMSE	0.276133
	VIDs (Variable olf.red-fruit):
	Variable	VID	Std. deviation	Lower bound (95%)	Upper bound (95%)
	x.2	-0.54503	0.60105	-1.8546	0.764544
	x.4	-0.555811	0.585762	-1.83208	0.720454
	x.5	0.748155	0.548933	-0.447868	1.94418
	x.6	-0.0160113	0.244537	-0.548811	0.516788
	x.7	-0.415495	0.349047	-1.176	0.345012
	x.8	-0.433991	0.374922	-1.25088	0.382895
	x.9	-0.379542	0.355444	-1.15399	0.394904
	x.11	-0.311039	0.290415	-0.943798	0.321721
	x.13	0.675685	0.19699	0.24648	1.10489
	x.14	0.433946	0.346623	-0.321281	1.18917
	x.15	-0.207134	0.163607	-0.563603	0.149336
	x.17	0.611236	0.210507	0.152581	1.06989
	x.19	-0.213425	0.216466	-0.685065	0.258214
	x.23	0.0700995	0.300229	-0.584043	0.724242
	x.24	-0.225673	0.204895	-0.672101	0.220755
	x.29	-0.257465	0.294896	-0.899989	0.385058
	x.30	-0.0282781	0.668765	-1.48539	1.42884
	x.38	-0.149444	0.219382	-0.627437	0.328549
	x.40	0.154688	0.551301	-1.04649	1.35587
	x.45	-0.406699	0.435518	-1.35561	0.542214
	Coefficients (Variable olf.red-fruit):
	Variable	Coefficient	Std. deviation	Lower bound (95%)	Upper bound (95%)
	Intercept	4.68021	0.385535	3.8402	5.52022
	x.2	-4.75538e-10	2.76479e-10	-1.07793e-09	1.26859e-10
	x.4	-7.24174e-09	4.55957e-09	-1.71762e-08	2.69272e-09
	x.5	1.23213e-08	1.42841e-08	-1.8801e-08	4.34437e-08
	x.6	1.86026e-10	3.03729e-10	-4.75744e-10	8.47795e-10
	x.7	-1.89685e-12	1.07843e-12	-4.24654e-12	4.52844e-13
	x.8	-2.5147e-11	1.87464e-11	-6.59918e-11	1.56978e-11
	x.9	-8.69206e-10	6.49379e-10	-2.28408e-09	5.45669e-10
	x.11	1.44823e-10	2.08855e-10	-3.10232e-10	5.99878e-10
	x.13	2.94398e-08	3.46018e-08	-4.5951e-08	1.04831e-07
	x.14	3.96518e-09	3.42687e-09	-3.50133e-09	1.14317e-08
	x.15	2.51014e-09	3.15237e-09	-4.35829e-09	9.37857e-09
	x.17	4.01779e-08	4.4478e-08	-5.67313e-08	1.37087e-07
	x.19	4.02592e-10	5.09818e-10	-7.08205e-10	1.51339e-09
	x.23	3.71576e-08	3.20288e-08	-3.26271e-08	1.06942e-07
	x.24	3.73435e-10	4.25668e-10	-5.54015e-10	1.30088e-09
	x.29	-7.06574e-08	8.48405e-08	-2.55509e-07	1.14194e-07
	x.30	4.02453e-07	4.03086e-07	-4.75795e-07	1.2807e-06
	x.38	2.38808e-11	2.12729e-11	-2.24687e-11	7.02304e-11
	x.40	-3.61629e-07	6.83769e-07	-1.85143e-06	1.12817e-06
	x.45	3.20946e-09	2.04784e-08	-4.1409e-08	4.7828e-08
	Standardized coefficients (Variable olf.red-fruit):
	Variable	Coefficient	Std. deviation	Lower bound (95%)	Upper bound (95%)
	x.2	-0.130038	0.0756046	-0.294766	0.0346902
	x.4	-0.153116	0.0964057	-0.363166	0.0569338
	x.5	0.349098	0.404708	-0.532686	1.23088
	x.6	0.0195664	0.0319467	-0.0500394	0.0891722
	x.7	-0.0254177	0.0144509	-0.0569036	0.00606809
	x.8	-0.0232772	0.0173525	-0.0610851	0.0145306
	x.9	-0.112841	0.0843032	-0.296522	0.0708394
	x.11	0.0550045	0.0793241	-0.117828	0.227837
	x.13	0.14172	0.166569	-0.221203	0.504642
	x.14	0.10868	0.093926	-0.0959669	0.313327
	x.15	0.0666162	0.0836602	-0.115664	0.248896
	x.17	0.152789	0.169141	-0.215738	0.521315
	x.19	0.0276066	0.0349593	-0.0485632	0.103777
	x.23	0.073874	0.0636772	-0.0648668	0.212615
	x.24	0.0501052	0.0571135	-0.0743345	0.174545
	x.29	-0.0394363	0.0473524	-0.142608	0.0637357
	x.30	0.142509	0.142733	-0.168479	0.453497
	x.38	0.0716904	0.0638612	-0.0674512	0.210832
	x.40	-0.0533931	0.100956	-0.273356	0.16657
	x.45	0.00721311	0.0460241	-0.0930648	0.107491
	Predictions and residuals (Variable olf.red-fruit):
	Observation	Weight	olf.red-fruit	Pred(olf.red-fruit)	Residual	Std. residual	Std. dev. on pred. (Mean)	Lower bound 95%(Mean)	Upper bound 95%(Mean)	Std. dev. on pred. (Observation)	Lower bound 95% (Observation)	Upper bound 95% (Observation)
	A1	1	5	5.19083	-0.190834	-0.637414	0.147145	4.87023	5.51144	0.381519	4.35957	6.02209
	A2	1	5.85714	5.76018	0.0969675	0.323886	0.306593	5.09217	6.42818	0.466802	4.7431	6.77725
	A_CC_C1	1	4.85714	5.25318	-0.39604	-1.32283	0.147538	4.93173	5.57464	0.381671	4.42159	6.08477
	A_CC_CC1	1	5.42857	5.24656	0.182008	0.607935	0.151514	4.91644	5.57668	0.383225	4.41159	6.08154
	A_CC_CC2	1	5.14286	5.125	0.0178596	0.0596537	0.11666	4.87082	5.37918	0.37083	4.31703	5.93297
	C1	1	4.85714	4.97925	-0.122107	-0.407855	0.148171	4.65641	5.30209	0.381916	4.14713	5.81137
	C2	1	5.14286	5.051	0.0918603	0.306827	0.128089	4.77192	5.33008	0.374582	4.23485	5.86714
	D2	1	5.75	5.00831	0.741694	2.47737	0.145245	4.69184	5.32477	0.38079	4.17863	5.83798
	E1	1	5	5.0133	-0.0133046	-0.0444394	0.140094	4.70807	5.31854	0.378855	4.18785	5.83876
	E2	1	4.5	4.91249	-0.412489	-1.37778	0.171821	4.53812	5.28685	0.391698	4.05905	5.76593
	2PN_A	1	4.75	4.66165	0.0883523	0.29511	0.337607	3.92607	5.39723	0.487733	3.59897	5.72433
	2PN_B	1	5	5.04449	-0.0444858	-0.148589	0.34782	4.28665	5.80232	0.494857	3.96628	6.12269
	XPN_B	1	5	5.03948	-0.0394825	-0.131878	0.319341	4.3437	5.73527	0.475272	4.00395	6.07501
	A_CC_C2	1	4.42857	5.26052	-0.831952	-2.77885	0.147145	4.93992	5.58113	0.381519	4.42926	6.09178
	D1	1	4.875	4.9736	-0.0986015	-0.329344	0.306593	4.30559	5.64161	0.466802	3.95653	5.99068
	XPN_A	1	4.625	4.53651	0.0884863	0.295558	0.147538	4.21506	4.85797	0.381671	3.70492	5.3681
	Results for variable olf.dry-fruit:
	Goodness of fit statistics (Variable olf.dry-fruit):
	Observations	13
	Sum of weights	13
	DF	8
	R²	0.706226
	Std. deviation	0.402588
	MSE	0.0997397
	RMSE	0.315816
	VIDs (Variable olf.dry-fruit):
	Variable	VID	Std. deviation	Lower bound (95%)	Upper bound (95%)
	x.2	-0.523593	0.283789	-1.14192	0.0947293
	x.4	-0.537144	0.288094	-1.16485	0.0905584
	x.5	-0.477335	0.393121	-1.33387	0.379202
	x.6	-0.187871	0.193229	-0.608881	0.233139
	x.7	-0.395123	0.303323	-1.05601	0.265762
	x.8	-0.397981	0.307463	-1.06788	0.271922
	x.9	-0.441312	0.261874	-1.01189	0.129262
	x.11	-0.172892	0.283231	-0.789999	0.444216
	x.13	0.0948342	0.373606	-0.719184	0.908853
	x.14	-0.279667	0.202658	-0.721221	0.161887
	x.15	-0.103594	0.277964	-0.709225	0.502037
	x.17	-0.314556	0.288168	-0.942422	0.313309
	x.19	-0.276494	0.25868	-0.840109	0.287121
	x.23	-0.121575	0.191943	-0.539782	0.296632
	x.24	-0.254848	0.271006	-0.84532	0.335624
	x.29	-0.392889	0.236102	-0.90731	0.121532
	x.30	-0.895011	0.134244	-1.1875	-0.602519
	x.38	-0.307561	0.244226	-0.839684	0.224563
	x.40	0.51013	0.181115	0.115515	0.904745
	x.45	-0.307916	0.284588	-0.92798	0.312147
	Coefficients (Variable olf.dry-fruit):
	Variable	Coefficient	Std. deviation	Lower bound (95%)	Upper bound (95%)
	Intercept	5.7408	0.359003	4.9586	6.523
	x.2	-2.58852e-10	3.5596e-10	-1.03442e-09	5.16718e-10
	x.4	-2.27015e-09	5.69613e-09	-1.46809e-08	1.01406e-08
	x.5	-1.43547e-08	1.86071e-08	-5.4896e-08	2.61867e-08
	x.6	-1.77747e-10	8.16804e-10	-1.95741e-09	1.60192e-09
	x.7	-4.049e-12	2.48114e-12	-9.45493e-12	1.35694e-12
	x.8	-6.43812e-11	3.81466e-11	-1.47496e-10	1.87332e-11
	x.9	-1.31259e-10	1.15499e-09	-2.64776e-09	2.38525e-09
	x.11	-1.07375e-10	3.83698e-10	-9.43382e-10	7.28632e-10
	x.13	-1.44253e-08	4.84329e-08	-1.19951e-07	9.11008e-08
	x.14	-1.07605e-08	4.84748e-09	-2.13223e-08	-1.98772e-10
	x.15	-1.00385e-10	4.64406e-09	-1.02189e-08	1.00181e-08
	x.17	-1.1022e-07	5.45191e-08	-2.29007e-07	8.56691e-09
	x.19	-6.30821e-10	7.74933e-10	-2.31925e-09	1.05761e-09
	x.23	-3.20222e-08	3.17087e-08	-1.01109e-07	3.70651e-08
	x.24	-3.73932e-10	5.13347e-10	-1.49242e-09	7.44555e-10
	x.29	-8.39307e-08	1.67974e-07	-4.49915e-07	2.82053e-07
	x.30	-1.64777e-06	7.28125e-07	-3.23422e-06	-6.13238e-08
	x.38	-3.97272e-11	1.75029e-11	-7.78627e-11	-1.59166e-12
	x.40	2.33125e-06	1.76367e-06	-1.51145e-06	6.17396e-06
	x.45	-3.15194e-08	4.87926e-08	-1.37829e-07	7.47906e-08
	Standardized coefficients (Variable olf.dry-fruit):
	Variable	Coefficient	Std. deviation	Lower bound (95%)	Upper bound (95%)
	x.2	-0.044544	0.0612546	-0.178006	0.0889183
	x.4	-0.0302054	0.0757897	-0.195337	0.134926
	x.5	-0.255938	0.331757	-0.978775	0.466899
	x.6	-0.011765	0.0540641	-0.129561	0.10603
	x.7	-0.0341431	0.0209222	-0.0797287	0.0114424
	x.8	-0.0375022	0.0222205	-0.0859165	0.0109122
	x.9	-0.0107233	0.0943574	-0.21631	0.194864
	x.11	-0.0256635	0.0917072	-0.225476	0.174149
	x.13	-0.0436992	0.146719	-0.363373	0.275975
	x.14	-0.185598	0.0836096	-0.367768	-0.00342843
	x.15	-0.00167649	0.0775588	-0.170663	0.16731
	x.17	-0.263764	0.130468	-0.54803	0.0205012
	x.19	-0.0272212	0.0334399	-0.10008	0.0456381
	x.23	-0.0400634	0.0396711	-0.126499	0.0463726
	x.24	-0.0315729	0.0433443	-0.126012	0.0628663
	x.29	-0.029479	0.0589975	-0.158023	0.0990655
	x.30	-0.367178	0.16225	-0.72069	-0.013665
	x.38	-0.0750502	0.0330654	-0.147093	-0.00300687
	x.40	0.216602	0.163867	-0.140433	0.573637
	x.45	-0.044578	0.0690076	-0.194933	0.105777
	Predictions and residuals (Variable olf.dry-fruit):
	Observation	Weight	olf.dry-fruit	Pred(olf.dry-fruit)	Residual	Std. residual	Std. dev. on pred. (Mean)	Lower bound 95%(Mean)	Upper bound 95%(Mean)	Std. dev. on pred. (Observation)	Lower bound 95% (Observation)	Upper bound 95% (Observation)
	A1	1	4.28571	4.44673	-0.161019	-0.338452	0.168292	4.08006	4.81341	0.436348	3.49601	5.39745
	A2	1	4	3.96817	0.0318269	0.066898	0.350653	3.20417	4.73218	0.533886	2.80493	5.13141
	A_CC_C1	1	4.57143	4.62098	-0.0495547	-0.104161	0.16874	4.25333	4.98864	0.436521	3.66989	5.57208
	A_CC_CC1	1	5	4.56196	0.438036	0.920721	0.173288	4.1844	4.93953	0.438299	3.60699	5.51693
	A_CC_CC2	1	4	4.75905	-0.759045	-1.59546	0.133425	4.46834	5.04975	0.424122	3.83496	5.68313
	C1	1	5.14286	5.31535	-0.172494	-0.362571	0.169464	4.94612	5.68458	0.436801	4.36364	6.26706
	C2	1	5.28571	5.15281	0.1329	0.279347	0.146497	4.83363	5.472	0.428414	4.21938	6.08625
	D2	1	5.5	5.29494	0.205063	0.431028	0.166119	4.933	5.65688	0.435514	4.34603	6.24384
	E1	1	5.83333	5.27579	0.557548	1.17193	0.160227	4.92668	5.62489	0.433301	4.3317	6.21987
	E2	1	5.16667	5.45954	-0.292875	-0.615604	0.196513	5.03138	5.88771	0.447989	4.48346	6.43563
	2PN_A	1	4	3.88935	0.11065	0.232578	0.386124	3.04806	4.73064	0.557825	2.67395	5.10475
	2PN_B	1	4.5	4.51865	-0.0186543	-0.0392101	0.397805	3.65191	5.3854	0.565973	3.2855	5.7518
	XPN_B	1	4.875	4.89738	-0.0223797	-0.0470406	0.365234	4.1016	5.69316	0.543574	3.71303	6.08173
	A_CC_C2	1	4.71429	4.50022	0.214066	0.449952	0.168292	4.13354	4.8669	0.436348	3.5495	5.45094
	D1	1	5.125	5.46163	-0.336634	-0.707581	0.350653	4.69763	6.22564	0.533886	4.2984	6.62487
	XPN_A	1	4.625	4.37878	0.246217	0.517532	0.16874	4.01113	4.74644	0.436521	3.42769	5.32988
	Results for variable olf.undergrowth:
	Goodness of fit statistics (Variable olf.undergrowth):
	Observations	13
	Sum of weights	13
	DF	8
	R²	0.672731
	Std. deviation	0.384746
	MSE	0.0910951
	RMSE	0.30182
	VIDs (Variable olf.undergrowth):
	Variable	VID	Std. deviation	Lower bound (95%)	Upper bound (95%)
	x.2	-0.0677696	0.254699	-0.622711	0.487172
	x.4	-0.0245052	0.251413	-0.572287	0.523277
	x.5	-0.719248	0.579152	-1.98111	0.542615
	x.6	-0.116967	0.279402	-0.725732	0.491799
	x.7	-0.287114	0.335937	-1.01906	0.444829
	x.8	-0.304725	0.355792	-1.07993	0.470479
	x.9	-0.0173468	0.244311	-0.549654	0.51496
	x.11	-0.418129	0.562807	-1.64438	0.808122
	x.13	-0.0882017	0.520747	-1.22281	1.04641
	x.14	-0.109118	0.436397	-1.05995	0.84171
	x.15	-0.431838	0.580665	-1.697	0.833322
	x.17	-0.133792	0.4257	-1.06131	0.793728
	x.19	-0.294578	0.339134	-1.03349	0.444331
	x.23	-0.246492	0.388706	-1.09341	0.600425
	x.24	-0.360561	0.416249	-1.26749	0.546368
	x.29	-0.0954473	0.241431	-0.621481	0.430586
	x.30	-0.348367	0.386282	-1.19	0.493269
	x.38	-0.32725	0.346704	-1.08265	0.428153
	x.40	0.23318	0.26312	-0.34011	0.80647
	x.45	-0.350525	0.452633	-1.33673	0.635677
	Coefficients (Variable olf.undergrowth):
	Variable	Coefficient	Std. deviation	Lower bound (95%)	Upper bound (95%)
	Intercept	3.99586	0.554139	2.78849	5.20322
	x.2	6.18189e-10	6.0981e-10	-7.10472e-10	1.94685e-09
	x.4	1.09198e-08	9.86122e-09	-1.0566e-08	3.24055e-08
	x.5	-2.60048e-08	2.68562e-08	-8.45195e-08	3.25099e-08
	x.6	-5.01373e-11	7.32881e-10	-1.64695e-09	1.54667e-09
	x.7	-2.89865e-12	2.66098e-12	-8.69642e-12	2.89913e-12
	x.8	-6.08459e-11	4.91837e-11	-1.68008e-10	4.6316e-11
	x.9	1.67954e-09	1.4414e-09	-1.46099e-09	4.82008e-09
	x.11	-6.64211e-10	5.24407e-10	-1.8068e-09	4.78373e-10
	x.13	-4.31295e-08	6.84514e-08	-1.92272e-07	1.06013e-07
	x.14	-2.5828e-09	5.60791e-09	-1.48014e-08	9.63578e-09
	x.15	-9.03554e-09	7.88482e-09	-2.62151e-08	8.14402e-09
	x.17	-4.90178e-08	7.19764e-08	-2.05841e-07	1.07805e-07
	x.19	-1.46233e-09	1.03474e-09	-3.71684e-09	7.92182e-10
	x.23	-6.06502e-08	5.10194e-08	-1.71812e-07	5.05116e-08
	x.24	-1.2663e-09	9.04006e-10	-3.23596e-09	7.03362e-10
	x.29	1.36888e-07	2.03744e-07	-3.07033e-07	5.80808e-07
	x.30	-8.64997e-07	5.50946e-07	-2.06541e-06	3.35411e-07
	x.38	-5.9203e-11	3.51138e-11	-1.35709e-10	1.73033e-11
	x.40	1.38802e-06	1.23566e-06	-1.30426e-06	4.08031e-06
	x.45	-7.145e-08	5.07813e-08	-1.82093e-07	3.91929e-08
	Standardized coefficients (Variable olf.undergrowth):
	Variable	Coefficient	Std. deviation	Lower bound (95%)	Upper bound (95%)
	x.2	0.117487	0.115895	-0.135026	0.37
	x.4	0.160463	0.144908	-0.155265	0.476192
	x.5	-0.512068	0.528833	-1.6643	0.640161
	x.6	-0.00366508	0.0535743	-0.120394	0.113063
	x.7	-0.026995	0.0247816	-0.0809895	0.0269995
	x.8	-0.0391436	0.031641	-0.108083	0.0297962
	x.9	0.151538	0.130051	-0.131819	0.434895
	x.11	-0.175328	0.138425	-0.47693	0.126273
	x.13	-0.144296	0.229014	-0.643275	0.354683
	x.14	-0.0491998	0.106825	-0.281952	0.183552
	x.15	-0.166656	0.145431	-0.483523	0.150212
	x.17	-0.129551	0.190229	-0.544026	0.284923
	x.19	-0.0696913	0.0493135	-0.177136	0.0377536
	x.23	-0.0838032	0.0704959	-0.237401	0.0697942
	x.24	-0.118083	0.0842994	-0.301756	0.0655891
	x.29	0.0530991	0.0790329	-0.119099	0.225297
	x.30	-0.212875	0.135588	-0.508295	0.0825446
	x.38	-0.123521	0.0732611	-0.283143	0.0361015
	x.40	0.14243	0.126796	-0.133835	0.418695
	x.45	-0.111603	0.0793193	-0.284425	0.0612185
	Predictions and residuals (Variable olf.undergrowth):
	Observation	Weight	olf.undergrowth	Pred(olf.undergrowth)	Residual	Std. residual	Std. dev. on pred. (Mean)	Lower bound 95%(Mean)	Upper bound 95%(Mean)	Std. dev. on pred. (Observation)	Lower bound 95% (Observation)	Upper bound 95% (Observation)
	A1	1	2.85714	3.18702	-0.32988	-0.765785	0.160833	2.8366	3.53745	0.41701	2.27844	4.09561
	A2	1	2.14286	2.08865	0.0542046	0.125831	0.335113	1.3585	2.8188	0.510226	0.976966	3.20034
	A_CC_C1	1	3.71429	3.25903	0.455255	1.05683	0.161262	2.90767	3.61039	0.417175	2.35008	4.16798
	A_CC_CC1	1	3.14286	3.25602	-0.113168	-0.262708	0.165608	2.8952	3.61685	0.418874	2.34338	4.16867
	A_CC_CC2	1	3.28571	3.36102	-0.0753056	-0.174815	0.127512	3.08319	3.63884	0.405326	2.47789	4.24415
	C1	1	3.28571	3.58174	-0.296024	-0.68719	0.161954	3.22887	3.93461	0.417443	2.67221	4.49127
	C2	1	3.28571	3.46445	-0.178739	-0.414925	0.140004	3.15941	3.7695	0.409427	2.57239	4.35652
	D2	1	3.125	3.60749	-0.482493	-1.12006	0.158757	3.26159	3.95339	0.416213	2.70064	4.51434
	E1	1	4.16667	3.54859	0.618075	1.4348	0.153126	3.21496	3.88222	0.414098	2.64635	4.45083
	E2	1	4	3.67724	0.322763	0.749263	0.187804	3.26805	4.08643	0.428135	2.74441	4.61006
	2PN_A	1	3.375	3.29527	0.0797318	0.18509	0.369012	2.49126	4.09928	0.533104	2.13374	4.4568
	2PN_B	1	3.125	3.13929	-0.0142885	-0.0331694	0.380175	2.31096	3.96762	0.540891	1.96079	4.31779
	XPN_B	1	2.5	2.54013	-0.0401322	-0.093163	0.349047	1.77962	3.30064	0.519484	1.40827	3.67199
	A_CC_C2	1	3.42857	3.20435	0.224219	0.520503	0.160833	2.85393	3.55478	0.41701	2.29577	4.11294
	D1	1	2.5	3.66912	-1.16912	-2.714	0.335113	2.93897	4.39927	0.510226	2.55743	4.78081
	XPN_A	1	3	3.41688	-0.416878	-0.967743	0.161262	3.06552	3.76824	0.417175	2.50793	4.32582
	Results for variable olf.spicy:
	Goodness of fit statistics (Variable olf.spicy):
	Observations	13
	Sum of weights	13
	DF	8
	R²	0.658058
	Std. deviation	0.608751
	MSE	0.228048
	RMSE	0.477543
	VIDs (Variable olf.spicy):
	Variable	VID	Std. deviation	Lower bound (95%)	Upper bound (95%)
	x.2	-0.582854	0.368714	-1.38621	0.220505
	x.4	-0.632414	0.354202	-1.40416	0.139326
	x.5	0.326041	0.233873	-0.183526	0.835607
	x.6	-0.650054	0.308078	-1.3213	0.0211904
	x.7	-0.965778	0.135359	-1.2607	-0.670857
	x.8	-0.9424	0.146829	-1.26231	-0.622487
	x.9	-0.816832	0.227964	-1.31352	-0.320142
	x.11	-0.687091	0.183209	-1.08627	-0.287914
	x.13	0.874504	0.188689	0.463386	1.28562
	x.14	0.023182	0.341577	-0.721051	0.767415
	x.15	-0.811921	0.159743	-1.15997	-0.463872
	x.17	0.740157	0.15481	0.402855	1.07746
	x.19	-0.920992	0.188042	-1.3307	-0.511284
	x.23	-0.645429	0.326191	-1.35614	0.065279
	x.24	-0.92891	0.160364	-1.27831	-0.579506
	x.29	-0.815537	0.225042	-1.30586	-0.325212
	x.30	-0.338275	0.341503	-1.08235	0.405796
	x.38	-0.888101	0.213176	-1.35257	-0.42363
	x.40	0.0254668	0.369631	-0.77989	0.830823
	x.45	-0.649262	0.249619	-1.19313	-0.105389
	Coefficients (Variable olf.spicy):
	Variable	Coefficient	Std. deviation	Lower bound (95%)	Upper bound (95%)
	Intercept	3.98123	0.449846	3.0011	4.96136
	x.2	-4.69428e-10	8.1044e-10	-2.23523e-09	1.29637e-09
	x.4	-7.21254e-09	1.11891e-08	-3.15916e-08	1.71665e-08
	x.5	5.72817e-09	1.24327e-08	-2.13603e-08	3.28166e-08
	x.6	-1.12902e-09	1.35098e-09	-4.07256e-09	1.81452e-09
	x.7	-1.21319e-11	4.69879e-12	-2.23697e-11	-1.89416e-12
	x.8	-1.67309e-10	7.24903e-11	-3.25251e-10	-9.36567e-12
	x.9	-1.42976e-09	1.28108e-09	-4.22099e-09	1.36147e-09
	x.11	-2.04961e-10	3.0712e-10	-8.74119e-10	4.64197e-10
	x.13	3.73204e-08	3.97806e-08	-4.9354e-08	1.23995e-07
	x.14	2.84127e-09	7.78122e-09	-1.41125e-08	1.97951e-08
	x.15	-4.12775e-09	4.76795e-09	-1.45162e-08	6.26073e-09
	x.17	6.66885e-08	9.36016e-08	-1.37252e-07	2.70629e-07
	x.19	-2.13682e-09	1.35751e-09	-5.09459e-09	8.20953e-10
	x.23	-4.2278e-08	7.14997e-08	-1.98062e-07	1.13506e-07
	x.24	-9.92888e-10	7.56552e-10	-2.64127e-09	6.55497e-10
	x.29	-2.79113e-07	1.95619e-07	-7.05329e-07	1.47104e-07
	x.30	2.39042e-07	9.59114e-07	-1.85069e-06	2.32877e-06
	x.38	-3.65504e-11	3.9907e-11	-1.235e-10	5.03995e-11
	x.40	-4.49207e-07	2.02384e-06	-4.85877e-06	3.96036e-06
	x.45	-3.74208e-08	4.69868e-08	-1.39796e-07	6.49546e-08
	Standardized coefficients (Variable olf.spicy):
	Variable	Coefficient	Std. deviation	Lower bound (95%)	Upper bound (95%)
	x.2	-0.0576364	0.0995059	-0.274441	0.159168
	x.4	-0.0684714	0.106223	-0.299911	0.162968
	x.5	0.0728699	0.15816	-0.271731	0.417471
	x.6	-0.0533189	0.0638016	-0.192331	0.0856928
	x.7	-0.0729923	0.0282704	-0.134588	-0.0113963
	x.8	-0.0695354	0.0301278	-0.135178	-0.00389248
	x.9	-0.0833398	0.0746732	-0.246039	0.079359
	x.11	-0.0349523	0.0523736	-0.149065	0.07916
	x.13	0.0806649	0.0859823	-0.106674	0.268004
	x.14	0.0349658	0.0957587	-0.173675	0.243606
	x.15	-0.0491855	0.0568141	-0.172973	0.0746017
	x.17	0.113867	0.159819	-0.23435	0.462083
	x.19	-0.0657898	0.0417961	-0.156856	0.0252761
	x.23	-0.03774	0.063825	-0.176803	0.101323
	x.24	-0.0598152	0.0455774	-0.15912	0.0394895
	x.29	-0.0699457	0.0490221	-0.176756	0.0368642
	x.30	0.0380053	0.152489	-0.29424	0.370251
	x.38	-0.0492659	0.0537902	-0.166465	0.0679329
	x.40	-0.029779	0.134165	-0.3221	0.262542
	x.45	-0.0377612	0.0474142	-0.141068	0.0655455
	Predictions and residuals (Variable olf.spicy):
	Observation	Weight	olf.spicy	Pred(olf.spicy)	Residual	Std. residual	Std. dev. on pred. (Mean)	Lower bound 95%(Mean)	Upper bound 95%(Mean)	Std. dev. on pred. (Observation)	Lower bound 95% (Observation)	Upper bound 95% (Observation)
	A1	1	5.14286	4.35615	0.786708	1.17984	0.254473	3.8017	4.9106	0.659799	2.91857	5.79373
	A2	1	4.14286	4.64159	-0.498738	-0.747965	0.530221	3.48634	5.79685	0.807286	2.88267	6.40052
	A_CC_C1	1	4.57143	4.45196	0.119467	0.179166	0.255151	3.89604	5.00789	0.66006	3.01381	5.89011
	A_CC_CC1	1	4.42857	4.43684	-0.00827173	-0.0124052	0.262027	3.86593	5.00775	0.662749	2.99284	5.88085
	A_CC_CC2	1	4.71429	4.22944	0.484847	0.727133	0.201752	3.78986	4.66902	0.641312	2.83214	5.62674
	C1	1	4.28571	4.16371	0.122004	0.182971	0.256246	3.6054	4.72202	0.660484	2.72464	5.60278
	C2	1	4.28571	4.24258	0.0431349	0.0646901	0.221517	3.75994	4.72522	0.647802	2.83114	5.65402
	D2	1	4.5	4.15415	0.345847	0.518672	0.251187	3.60686	4.70144	0.658538	2.71932	5.58898
	E1	1	3	4.16405	-1.16405	-1.74575	0.242278	3.63617	4.69193	0.655192	2.73651	5.59159
	E2	1	3.83333	4.08129	-0.247958	-0.371866	0.297146	3.43387	4.72872	0.677402	2.60536	5.55722
	2PN_A	1	2.625	2.97175	-0.346754	-0.520033	0.583856	1.69964	4.24387	0.843484	1.13396	4.80955
	2PN_B	1	2.375	2.42582	-0.0508153	-0.0762086	0.601519	1.11522	3.73641	0.855805	0.561176	4.29045
	XPN_B	1	3.375	2.96042	0.414581	0.621754	0.552268	1.75713	4.16371	0.821935	1.16958	4.75126
	A_CC_C2	1	4.57143	4.37199	0.199437	0.299099	0.254473	3.81754	4.92644	0.659799	2.93441	5.80957
	D1	1	4.125	4.11465	0.0103453	0.015515	0.530221	2.9594	5.26991	0.807286	2.35573	5.87358
	XPN_A	1	3.125	2.31717	0.807825	1.21151	0.255151	1.76125	2.8731	0.66006	0.879026	3.75532
	Results for variable olf.woody:
	Goodness of fit statistics (Variable olf.woody):
	Observations	13
	Sum of weights	13
	DF	8
	R²	0.569348
	Std. deviation	0.546974
	MSE	0.184111
	RMSE	0.429082
	VIDs (Variable olf.woody):
	Variable	VID	Std. deviation	Lower bound (95%)	Upper bound (95%)
	x.2	-0.459799	0.211667	-0.920981	0.00138352
	x.4	-0.438477	0.177642	-0.825525	-0.0514277
	x.5	-0.000776217	0.427804	-0.932882	0.93133
	x.6	-0.384467	0.310893	-1.06185	0.292911
	x.7	-0.86686	0.137036	-1.16544	-0.568284
	x.8	-0.883421	0.1428	-1.19456	-0.572286
	x.9	-0.462483	0.214278	-0.929355	0.00438955
	x.11	-0.899773	0.216031	-1.37046	-0.429081
	x.13	0.683277	0.275031	0.084035	1.28252
	x.14	0.250218	0.279564	-0.358899	0.859335
	x.15	-0.946488	0.118113	-1.20383	-0.689142
	x.17	0.695568	0.219578	0.217148	1.17399
	x.19	-0.78678	0.182903	-1.18529	-0.388268
	x.23	-0.500262	0.261996	-1.0711	0.0705788
	x.24	-0.877543	0.142512	-1.18805	-0.567037
	x.29	-0.497041	0.240089	-1.02015	0.026068
	x.30	-0.200532	0.247792	-0.740425	0.339361
	x.38	-0.757148	0.191556	-1.17451	-0.339783
	x.40	0.145874	0.337412	-0.589284	0.881032
	x.45	-0.807278	0.257514	-1.36835	-0.246203
	Coefficients (Variable olf.woody):
	Variable	Coefficient	Std. deviation	Lower bound (95%)	Upper bound (95%)
	Intercept	4.21799	0.442156	3.25462	5.18137
	x.2	1.44608e-10	3.39823e-10	-5.95803e-10	8.85019e-10
	x.4	3.3528e-09	5.74522e-09	-9.16495e-09	1.58706e-08
	x.5	-9.88609e-09	1.46964e-08	-4.19067e-08	2.21345e-08
	x.6	-1.96082e-10	9.52863e-10	-2.27219e-09	1.88003e-09
	x.7	-8.61874e-12	1.74089e-12	-1.24118e-11	-4.82567e-12
	x.8	-1.39912e-10	3.44111e-11	-2.14887e-10	-6.49364e-11
	x.9	5.89067e-10	1.09284e-09	-1.79202e-09	2.97016e-09
	x.11	-6.83618e-10	3.58371e-10	-1.46444e-09	9.72056e-11
	x.13	4.97299e-10	3.52634e-08	-7.6335e-08	7.73296e-08
	x.14	6.80057e-09	7.26712e-09	-9.03313e-09	2.26343e-08
	x.15	-9.72954e-09	4.40053e-09	-1.93175e-08	-1.41615e-10
	x.17	5.53837e-08	7.79364e-08	-1.14425e-07	2.25193e-07
	x.19	-1.8762e-09	5.76299e-10	-3.13184e-09	-6.20547e-10
	x.23	-3.46819e-08	3.25174e-08	-1.05531e-07	3.61675e-08
	x.24	-1.34693e-09	4.43057e-10	-2.31227e-09	-3.81594e-10
	x.29	1.74205e-08	1.90731e-07	-3.98146e-07	4.32987e-07
	x.30	1.55511e-07	6.98046e-07	-1.3654e-06	1.67642e-06
	x.38	-4.28968e-11	2.37486e-11	-9.46406e-11	8.84702e-12
	x.40	1.79435e-07	1.48921e-06	-3.06528e-06	3.42415e-06
	x.45	-8.53688e-08	4.47174e-08	-1.828e-07	1.20621e-08
	Standardized coefficients (Variable olf.woody):
	Variable	Coefficient	Std. deviation	Lower bound (95%)	Upper bound (95%)
	x.2	0.0221758	0.0521124	-0.0913672	0.135719
	x.4	0.0397548	0.068122	-0.10867	0.18818
	x.5	-0.157078	0.233508	-0.665849	0.351692
	x.6	-0.0115659	0.0562046	-0.134025	0.110893
	x.7	-0.0647664	0.0130821	-0.0932698	-0.036263
	x.8	-0.0726276	0.0178626	-0.111547	-0.0337082
	x.9	0.0428858	0.0795618	-0.130465	0.216236
	x.11	-0.145605	0.0763302	-0.311914	0.020704
	x.13	0.0013425	0.0951967	-0.206073	0.208758
	x.14	0.104529	0.1117	-0.138845	0.347902
	x.15	-0.144802	0.065492	-0.287497	-0.00210762
	x.17	0.11811	0.166206	-0.244021	0.480242
	x.19	-0.0721488	0.0221615	-0.120435	-0.023863
	x.23	-0.0386678	0.0362546	-0.11766	0.0403241
	x.24	-0.101348	0.0333373	-0.173984	-0.0287126
	x.29	0.00545256	0.0596983	-0.124619	0.135524
	x.30	0.030881	0.138616	-0.271137	0.332899
	x.38	-0.0722169	0.0399809	-0.159328	0.014894
	x.40	0.014857	0.123305	-0.253801	0.283515
	x.45	-0.107595	0.0563599	-0.230393	0.0152025
	Predictions and residuals (Variable olf.woody):
	Observation	Weight	olf.woody	Pred(olf.woody)	Residual	Std. residual	Std. dev. on pred. (Mean)	Lower bound 95%(Mean)	Upper bound 95%(Mean)	Std. dev. on pred. (Observation)	Lower bound 95% (Observation)	Upper bound 95% (Observation)
	A1	1	4.28571	4.47396	-0.188248	-0.352613	0.228649	3.97578	4.97214	0.592841	3.18227	5.76565
	A2	1	3.71429	4.07698	-0.36269	-0.679366	0.476413	3.03896	5.11499	0.725362	2.49655	5.6574
	A_CC_C1	1	5.28571	4.59916	0.686551	1.286	0.229258	4.09965	5.09867	0.593077	3.30696	5.89137
	A_CC_CC1	1	4.57143	4.60618	-0.0347477	-0.0650872	0.235436	4.0932	5.11915	0.595492	3.30871	5.90364
	A_CC_CC2	1	4.71429	4.43855	0.275735	0.516489	0.181277	4.04358	4.83352	0.576231	3.18305	5.69405
	C1	1	4.85714	4.29253	0.564615	1.0576	0.230242	3.79087	4.79418	0.593457	2.9995	5.58556
	C2	1	4.14286	4.32594	-0.183084	-0.34294	0.199037	3.89228	4.7596	0.582062	3.05774	5.59414
	D2	1	4.375	4.36233	0.0126747	0.0237414	0.225696	3.87058	4.85408	0.591709	3.0731	5.65155
	E1	1	4.5	4.30705	0.192953	0.361426	0.217691	3.83274	4.78136	0.588702	3.02438	5.58972
	E2	1	3.16667	4.24416	-1.07749	-2.01829	0.266991	3.66244	4.82588	0.608658	2.91801	5.57031
	2PN_A	1	3.625	3.71004	-0.0850376	-0.159287	0.524606	2.56702	4.85305	0.757886	2.05875	5.36133
	2PN_B	1	3.375	3.49944	-0.124437	-0.233088	0.540476	2.32184	4.67703	0.768957	1.82402	5.17485
	XPN_B	1	3.125	2.80179	0.323208	0.605413	0.496223	1.72061	3.88297	0.738524	1.19269	4.4109
	A_CC_C2	1	5.57143	4.55955	1.01188	1.89539	0.228649	4.06136	5.05773	0.592841	3.26786	5.85124
	D1	1	4.875	4.31595	0.559047	1.04717	0.476413	3.27794	5.35397	0.725362	2.73553	5.89638
	XPN_A	1	3.375	3.27371	0.101291	0.189731	0.229258	2.7742	3.77322	0.593077	1.98151	4.56591
	Results for variable olf.burning:
	Goodness of fit statistics (Variable olf.burning):
	Observations	13
	Sum of weights	13
	DF	8
	R²	0.162653
	Std. deviation	0.797392
	MSE	0.391282
	RMSE	0.625526
	VIDs (Variable olf.burning):
	Variable	VID	Std. deviation	Lower bound (95%)	Upper bound (95%)
	x.2	-0.00205004	0.479006	-1.04571	1.04161
	x.4	-0.0306693	0.511375	-1.14486	1.08352
	x.5	0.59753	0.450519	-0.384067	1.57913
	x.6	-0.383899	0.446247	-1.35619	0.58839
	x.7	-0.440771	0.516281	-1.56565	0.68411
	x.8	-0.417496	0.500245	-1.50744	0.672443
	x.9	-0.279118	0.551167	-1.48001	0.921772
	x.11	-0.404282	0.345407	-1.15686	0.348295
	x.13	0.58907	0.418634	-0.323055	1.50119
	x.14	0.213631	0.315295	-0.473337	0.9006
	x.15	-0.574972	0.403777	-1.45473	0.304783
	x.17	0.8235	0.141068	0.516139	1.13086
	x.19	-0.519917	0.505194	-1.62064	0.580807
	x.23	-0.443893	0.438451	-1.3992	0.511411
	x.24	-0.544058	0.490043	-1.61177	0.523655
	x.29	-0.329654	0.53421	-1.4936	0.834289
	x.30	0.463462	0.564168	-0.765754	1.69268
	x.38	-0.472519	0.521313	-1.60836	0.663324
	x.40	-0.415067	0.328687	-1.13121	0.301081
	x.45	-0.251449	0.355795	-1.02666	0.523762
	Coefficients (Variable olf.burning):
	Variable	Coefficient	Std. deviation	Lower bound (95%)	Upper bound (95%)
	Intercept	3.55006	0.370452	2.74291	4.3572
	x.2	9.51907e-12	3.9904e-10	-8.59915e-10	8.78953e-10
	x.4	-6.52619e-10	5.5746e-09	-1.27986e-08	1.14934e-08
	x.5	7.34639e-09	1.10593e-08	-1.67497e-08	3.14425e-08
	x.6	-3.26192e-10	6.19535e-10	-1.67604e-09	1.02366e-09
	x.7	-2.12933e-12	3.11136e-12	-8.90841e-12	4.64976e-12
	x.8	-2.55775e-11	4.99273e-11	-1.3436e-10	8.32047e-11
	x.9	-3.37729e-10	6.83607e-10	-1.82718e-09	1.15172e-09
	x.11	-3.87124e-11	2.45439e-10	-5.73478e-10	4.96053e-10
	x.13	1.65224e-08	3.36288e-08	-5.67484e-08	8.97932e-08
	x.14	5.62232e-09	6.31097e-09	-8.12811e-09	1.93728e-08
	x.15	-1.68179e-09	3.64576e-09	-9.62522e-09	6.26165e-09
	x.17	7.05158e-08	7.93833e-08	-1.02445e-07	2.43477e-07
	x.19	-4.92051e-10	7.47858e-10	-2.12149e-09	1.13739e-09
	x.23	-3.64391e-09	2.64703e-08	-6.13178e-08	5.40299e-08
	x.24	-2.12529e-10	4.82746e-10	-1.26434e-09	8.39284e-10
	x.29	-4.94818e-08	9.62284e-08	-2.59146e-07	1.60182e-07
	x.30	8.10717e-07	8.75121e-07	-1.09601e-06	2.71744e-06
	x.38	3.27605e-12	2.24785e-11	-4.57004e-11	5.22525e-11
	x.40	-1.20508e-06	1.62874e-06	-4.7538e-06	2.34365e-06
	x.45	1.10454e-09	3.17099e-08	-6.79854e-08	7.01945e-08
	Standardized coefficients (Variable olf.burning):
	Variable	Coefficient	Std. deviation	Lower bound (95%)	Upper bound (95%)
	x.2	0.00139626	0.0585314	-0.126133	0.128925
	x.4	-0.00740159	0.0632235	-0.145154	0.130351
	x.5	0.111648	0.168075	-0.254556	0.477852
	x.6	-0.0184034	0.0349536	-0.0945607	0.0577538
	x.7	-0.015305	0.0223636	-0.0640311	0.0334211
	x.8	-0.0126996	0.0247896	-0.0667115	0.0413123
	x.9	-0.0235181	0.0476036	-0.127237	0.0802012
	x.11	-0.00788676	0.0500025	-0.116833	0.101059
	x.13	0.0426634	0.0868347	-0.146533	0.23186
	x.14	0.0826592	0.0927837	-0.119499	0.284817
	x.15	-0.0239408	0.0518987	-0.137018	0.0891367
	x.17	0.143839	0.161927	-0.20897	0.496648
	x.19	-0.0180986	0.0275077	-0.0780328	0.0418356
	x.23	-0.00388596	0.0282286	-0.0653909	0.057619
	x.24	-0.0152959	0.0347436	-0.0909956	0.0604038
	x.29	-0.014814	0.028809	-0.0775835	0.0479556
	x.30	0.153986	0.166219	-0.208175	0.516147
	x.38	0.00527533	0.0361964	-0.0735899	0.0841405
	x.40	-0.0954385	0.128991	-0.376486	0.185609
	x.45	0.00133156	0.0382272	-0.0819583	0.0846214
	Predictions and residuals (Variable olf.burning):
	Observation	Weight	olf.burning	Pred(olf.burning)	Residual	Std. residual	Std. dev. on pred. (Mean)	Lower bound 95%(Mean)	Upper bound 95%(Mean)	Std. dev. on pred. (Observation)	Lower bound 95% (Observation)	Upper bound 95% (Observation)
	A1	1	5.14286	4.23154	0.911321	1.63277	0.33333	3.50527	4.9578	0.864258	2.34848	6.11459
	A2	1	4.14286	4.49213	-0.349276	-0.625781	0.694526	2.97889	6.00538	1.05745	2.18815	6.79612
	A_CC_C1	1	4.85714	4.17722	0.679927	1.21819	0.334218	3.44902	4.90541	0.864601	2.29341	6.06102
	A_CC_CC1	1	3.28571	4.2003	-0.914585	-1.63862	0.343225	3.45248	4.94812	0.868123	2.30882	6.09178
	A_CC_CC2	1	4.42857	4.04872	0.379852	0.680562	0.264271	3.47292	4.62452	0.840043	2.21842	5.87902
	C1	1	4.57143	3.78077	0.790658	1.41658	0.335652	3.04945	4.51209	0.865157	1.89576	5.66579
	C2	1	4.14286	3.87652	0.266334	0.477178	0.290161	3.24432	4.50873	0.848544	2.0277	5.72534
	D2	1	3.375	3.7843	-0.409303	-0.733327	0.329026	3.06742	4.50119	0.862607	1.90484	5.66376
	E1	1	2.5	3.79588	-1.29588	-2.32177	0.317356	3.10442	4.48734	0.858224	1.92597	5.66579
	E2	1	3.66667	3.69178	-0.0251096	-0.0449876	0.389226	2.84372	4.53983	0.887317	1.75848	5.62507
	2PN_A	1	3.75	4.06675	-0.316749	-0.567503	0.764783	2.40043	5.73307	1.10486	1.65945	6.47404
	2PN_B	1	3.625	3.54382	0.0811831	0.145452	0.787919	1.82709	5.26054	1.121	1.10136	5.98627
	XPN_B	1	3.75	3.54837	0.20163	0.361251	0.723406	1.9722	5.12454	1.07664	1.20258	5.89416
	A_CC_C2	1	3.71429	4.20513	-0.490844	-0.879421	0.33333	3.47887	4.93139	0.864258	2.32207	6.08819
	D1	1	4.125	3.69624	0.428757	0.768183	0.694526	2.183	5.20949	1.05745	1.39226	6.00023
	XPN_A	1	3.875	3.62371	0.251285	0.450215	0.334218	2.89552	4.35191	0.864601	1.73991	5.50752
	Results for variable olf.cleanness:
	Goodness of fit statistics (Variable olf.cleanness):
	Observations	13
	Sum of weights	13
	DF	8
	R²	0.640741
	Std. deviation	0.366223
	MSE	0.0825349
	RMSE	0.287289
	VIDs (Variable olf.cleanness):
	Variable	VID	Std. deviation	Lower bound (95%)	Upper bound (95%)
	x.2	0.316673	0.473108	-0.714141	1.34749
	x.4	0.225391	0.449052	-0.75301	1.20379
	x.5	-0.216973	0.413154	-1.11716	0.683212
	x.6	-0.215312	0.348073	-0.973697	0.543074
	x.7	0.423056	0.394189	-0.435807	1.28192
	x.8	0.492159	0.40673	-0.394029	1.37835
	x.9	-0.0786521	0.3512	-0.843852	0.686548
	x.11	0.789321	0.358296	0.00866185	1.56998
	x.13	-0.482367	0.381445	-1.31346	0.34873
	x.14	-0.740407	0.208753	-1.19524	-0.285573
	x.15	0.644807	0.297187	-0.00270711	1.29232
	x.17	-0.695933	0.22512	-1.18643	-0.205438
	x.19	0.223596	0.340983	-0.519341	0.966533
	x.23	-0.0730544	0.338868	-0.811384	0.665275
	x.24	0.373259	0.338577	-0.364437	1.11095
	x.29	-0.101342	0.340599	-0.843444	0.64076
	x.30	-0.236671	0.508275	-1.34411	0.870765
	x.38	0.164974	0.346341	-0.589639	0.919587
	x.40	-0.227074	0.523108	-1.36683	0.91268
	x.45	0.732969	0.435726	-0.216396	1.68233
	Coefficients (Variable olf.cleanness):
	Variable	Coefficient	Std. deviation	Lower bound (95%)	Upper bound (95%)
	Intercept	7.7709	0.301	7.11508	8.42672
	x.2	-9.18808e-12	3.52339e-10	-7.76869e-10	7.58493e-10
	x.4	-1.4048e-09	5.41326e-09	-1.31993e-08	1.03897e-08
	x.5	3.90411e-10	1.08084e-08	-2.31591e-08	2.39399e-08
	x.6	-8.13748e-10	9.61921e-10	-2.90959e-09	1.2821e-09
	x.7	3.66191e-12	2.36762e-12	-1.49669e-12	8.8205e-12
	x.8	7.46545e-11	4.29468e-11	-1.89184e-11	1.68228e-10
	x.9	-7.94314e-10	1.00962e-09	-2.99408e-09	1.40546e-09
	x.11	5.29197e-10	3.29784e-10	-1.89341e-10	1.24774e-09
	x.13	-9.50525e-09	2.93698e-08	-7.34965e-08	5.4486e-08
	x.14	-1.2557e-08	5.30664e-09	-2.41191e-08	-9.94778e-10
	x.15	6.32857e-09	3.6242e-09	-1.56788e-09	1.4225e-08
	x.17	-8.28155e-08	7.47354e-08	-2.4565e-07	8.0019e-08
	x.19	2.55394e-10	6.63401e-10	-1.19003e-09	1.70082e-09
	x.23	-3.44539e-08	3.55797e-08	-1.11975e-07	4.30676e-08
	x.24	4.90142e-10	4.30866e-10	-4.48636e-10	1.42892e-09
	x.29	-1.54751e-07	1.67287e-07	-5.19239e-07	2.09736e-07
	x.30	-7.13712e-07	7.13672e-07	-2.26867e-06	8.41247e-07
	x.38	-5.65838e-12	2.1913e-11	-5.34027e-11	4.20859e-11
	x.40	1.86051e-07	1.64364e-06	-3.39514e-06	3.76724e-06
	x.45	7.2194e-08	4.83388e-08	-3.31272e-08	1.77515e-07
	Standardized coefficients (Variable olf.cleanness):
	Variable	Coefficient	Std. deviation	Lower bound (95%)	Upper bound (95%)
	x.2	-0.00192209	0.0737073	-0.162516	0.158672
	x.4	-0.0227226	0.0875592	-0.213498	0.168052
	x.5	0.00846205	0.23427	-0.501968	0.518892
	x.6	-0.0654776	0.0774003	-0.234118	0.103163
	x.7	0.0375384	0.0242706	-0.0153426	0.0904194
	x.8	0.0528647	0.0304117	-0.0133966	0.119126
	x.9	-0.0788864	0.100269	-0.297354	0.139581
	x.11	0.15376	0.0958199	-0.0550136	0.362533
	x.13	-0.0350045	0.108158	-0.270661	0.200652
	x.14	-0.263292	0.111269	-0.505725	-0.0208583
	x.15	0.128485	0.0735796	-0.0318316	0.288801
	x.17	-0.240924	0.217417	-0.714635	0.232788
	x.19	0.0133975	0.0348008	-0.0624269	0.0892219
	x.23	-0.0524018	0.0541141	-0.170306	0.0655026
	x.24	0.05031	0.0442258	-0.0460497	0.14667
	x.29	-0.0660751	0.0714276	-0.221702	0.0895524
	x.30	-0.193337	0.193326	-0.614557	0.227884
	x.38	-0.0129948	0.0503243	-0.122642	0.0966525
	x.40	0.0210144	0.185649	-0.38348	0.425509
	x.45	0.124124	0.0831095	-0.056956	0.305204
	Predictions and residuals (Variable olf.cleanness):
	Observation	Weight	olf.cleanness	Pred(olf.cleanness)	Residual	Std. residual	Std. dev. on pred. (Mean)	Lower bound 95%(Mean)	Upper bound 95%(Mean)	Std. dev. on pred. (Observation)	Lower bound 95% (Observation)	Upper bound 95% (Observation)
	A1	1	6.85714	6.95312	-0.0959819	-0.245256	0.15309	6.61957	7.28668	0.396933	6.08828	7.81797
	A2	1	7.28571	6.93635	0.349359	0.892695	0.318979	6.24136	7.63135	0.485661	5.87819	7.99452
	A_CC_C1	1	6.28571	6.81709	-0.531372	-1.35778	0.153498	6.48264	7.15153	0.397091	5.9519	7.68227
	A_CC_CC1	1	6.71429	6.7968	-0.0825178	-0.210852	0.157635	6.45335	7.14026	0.398708	5.92809	7.66551
	A_CC_CC2	1	6.71429	7.0246	-0.310313	-0.792922	0.121373	6.76015	7.28905	0.385812	6.18399	7.86521
	C1	1	7.57143	7.40557	0.165854	0.423797	0.154157	7.0697	7.74145	0.397346	6.53983	8.27132
	C2	1	7.28571	7.31558	-0.0298653	-0.0763129	0.133264	7.02522	7.60594	0.389716	6.46646	8.1647
	D2	1	7.875	7.27437	0.600627	1.53474	0.151114	6.94513	7.60362	0.396175	6.41118	8.13756
	E1	1	7.5	7.34274	0.157264	0.401846	0.145754	7.02517	7.66031	0.394162	6.48393	8.20154
	E2	1	7.33333	7.50352	-0.170189	-0.434872	0.178762	7.11403	7.89301	0.407523	6.61561	8.39144
	2PN_A	1	7.625	7.44308	0.181923	0.464856	0.351246	6.67778	8.20838	0.507438	6.33746	8.54869
	2PN_B	1	7	6.95503	0.0449678	0.114903	0.361872	6.16658	7.74348	0.51485	5.83327	8.07679
	XPN_B	1	8	8.27976	-0.279757	-0.714844	0.332243	7.55586	9.00365	0.494474	7.20239	9.35712
	A_CC_C2	1	6.85714	6.78371	0.0734369	0.187648	0.15309	6.45015	7.11726	0.396933	5.91886	7.64855
	D1	1	7.5	7.36706	0.132945	0.339705	0.318979	6.67206	8.06205	0.485661	6.30889	8.42522
	XPN_A	1	7.75	7.7282	0.0218006	0.0557057	0.153498	7.39376	8.06264	0.397091	6.86301	8.59339
	Results for variable unpleasant-odors:
	Goodness of fit statistics (Variable unpleasant-odors):
	Observations	13
	Sum of weights	13
	DF	8
	R²	0.529195
	Std. deviation	0.377398
	MSE	0.0876486
	RMSE	0.296055
	VIDs (Variable unpleasant-odors):
	Variable	VID	Std. deviation	Lower bound (95%)	Upper bound (95%)
	x.2	0.279387	0.43568	-0.66988	1.22865
	x.4	0.415649	0.396203	-0.447603	1.2789
	x.5	-0.181527	0.290434	-0.814329	0.451274
	x.6	0.788635	0.472394	-0.240623	1.81789
	x.7	0.489737	0.576427	-0.76619	1.74566
	x.8	0.403052	0.583413	-0.868095	1.6742
	x.9	0.854176	0.341845	0.109361	1.59899
	x.11	-0.136749	0.60586	-1.4568	1.18331
	x.13	-0.388899	0.417353	-1.29823	0.520435
	x.14	0.653617	0.299237	0.00163555	1.3056
	x.15	0.101246	0.663379	-1.34413	1.54663
	x.17	-0.0471245	0.413375	-0.947791	0.853542
	x.19	0.618663	0.595845	-0.679573	1.9169
	x.23	0.629498	0.556032	-0.581992	1.84099
	x.24	0.478088	0.637658	-0.91125	1.86743
	x.29	0.857159	0.407246	-0.0301535	1.74447
	x.30	0.539647	0.399313	-0.330381	1.40968
	x.38	0.638692	0.594081	-0.6557	1.93308
	x.40	0.179652	0.478542	-0.863001	1.2223
	x.45	-0.0990069	0.568095	-1.33678	1.13877
	Coefficients (Variable unpleasant-odors):
	Variable	Coefficient	Std. deviation	Lower bound (95%)	Upper bound (95%)
	Intercept	1.65957	0.259231	1.09476	2.22439
	x.2	2.96514e-10	2.6188e-10	-2.74074e-10	8.67101e-10
	x.4	5.57192e-09	4.03022e-09	-3.20918e-09	1.4353e-08
	x.5	-5.09703e-09	8.22962e-09	-2.30278e-08	1.28338e-08
	x.6	1.09783e-09	9.35683e-10	-9.40852e-10	3.1365e-09
	x.7	2.43783e-12	2.4191e-12	-2.83293e-12	7.70859e-12
	x.8	1.37186e-11	3.89173e-11	-7.1075e-11	9.85122e-11
	x.9	1.41401e-09	8.12405e-10	-3.56066e-10	3.18409e-09
	x.11	-3.74899e-10	3.05853e-10	-1.04129e-09	2.91497e-10
	x.13	-1.3524e-08	1.61368e-08	-4.8683e-08	2.1635e-08
	x.14	8.30589e-09	3.84891e-09	-8.0167e-11	1.66919e-08
	x.15	-3.94008e-09	3.87253e-09	-1.23776e-08	4.49745e-09
	x.17	3.21341e-08	3.6731e-08	-4.7896e-08	1.12164e-07
	x.19	6.02755e-10	9.18782e-10	-1.3991e-09	2.60461e-09
	x.23	3.84773e-08	4.69961e-08	-6.39185e-08	1.40873e-07
	x.24	-5.95636e-11	5.26402e-10	-1.20649e-09	1.08737e-09
	x.29	2.56451e-07	1.56657e-07	-8.48752e-08	5.97777e-07
	x.30	4.06675e-07	3.2991e-07	-3.12138e-07	1.12549e-06
	x.38	1.52057e-11	2.45625e-11	-3.83115e-11	6.87228e-11
	x.40	1.02426e-07	9.79822e-07	-2.03242e-06	2.23727e-06
	x.45	-4.39365e-08	4.25394e-08	-1.36622e-07	4.8749e-08
	Standardized coefficients (Variable unpleasant-odors):
	Variable	Coefficient	Std. deviation	Lower bound (95%)	Upper bound (95%)
	x.2	0.068906	0.0608576	-0.0636913	0.201503
	x.4	0.100118	0.072416	-0.0576634	0.257899
	x.5	-0.122725	0.198151	-0.55446	0.309009
	x.6	0.0981295	0.0836363	-0.0840984	0.280357
	x.7	0.027761	0.0275477	-0.0322602	0.0877822
	x.8	0.0107915	0.0306137	-0.05591	0.077493
	x.9	0.156001	0.0896285	-0.039283	0.351284
	x.11	-0.121005	0.0987191	-0.336095	0.0940855
	x.13	-0.0553259	0.0660145	-0.199159	0.0885072
	x.14	0.193465	0.0896507	-0.00186729	0.388797
	x.15	-0.0888615	0.0873381	-0.279155	0.101432
	x.17	0.103848	0.118704	-0.154785	0.362481
	x.19	0.035125	0.0535412	-0.0815313	0.151781
	x.23	0.0650093	0.0794024	-0.107994	0.238012
	x.24	-0.00679168	0.0600224	-0.137569	0.123986
	x.29	0.121638	0.0743046	-0.0402575	0.283534
	x.30	0.122377	0.0992772	-0.0939292	0.338684
	x.38	0.0387922	0.0626631	-0.097739	0.175323
	x.40	0.0128516	0.122941	-0.255013	0.280716
	x.45	-0.0839157	0.0812474	-0.260939	0.0931073
	Predictions and residuals (Variable unpleasant-odors):
	Observation	Weight	unpleasant-odors	Pred(unpleasant-odors)	Residual	Std. residual	Std. dev. on pred. (Mean)	Lower bound 95%(Mean)	Upper bound 95%(Mean)	Std. dev. on pred. (Observation)	Lower bound 95% (Observation)	Upper bound 95% (Observation)
	A1	1	1.57143	2.07288	-0.501456	-1.4234	0.157762	1.72915	2.41662	0.409045	1.18165	2.96412
	A2	1	1.85714	1.85685	0.000290076	0.00082339	0.328713	1.14065	2.57306	0.500481	0.766399	2.94731
	A_CC_C1	1	2.28571	2.13156	0.154157	0.43758	0.158182	1.78691	2.47621	0.409207	1.23997	3.02314
	A_CC_CC1	1	2.42857	2.15579	0.272779	0.774291	0.162445	1.80186	2.50973	0.410874	1.26058	3.05101
	A_CC_CC2	1	2.42857	2.07971	0.348863	0.99026	0.125077	1.80719	2.35223	0.397584	1.21345	2.94597
	C1	1	1.57143	1.82383	-0.252398	-0.716441	0.158861	1.4777	2.16995	0.40947	0.931668	2.71599
	C2	1	1.85714	1.85064	0.00650247	0.0184575	0.13733	1.55142	2.14986	0.401608	0.975613	2.72567
	D2	1	1.375	1.92923	-0.554228	-1.57319	0.155725	1.58993	2.26852	0.408264	1.0397	2.81876
	E1	1	1.83333	1.86836	-0.0350234	-0.0994151	0.150201	1.5411	2.19562	0.406189	0.983347	2.75337
	E2	1	2.33333	1.79105	0.542284	1.53929	0.184217	1.38967	2.19242	0.419958	0.876038	2.70606
	2PN_A	1	2.375	2.35371	0.0212863	0.0604218	0.361964	1.56506	3.14237	0.522922	1.21437	3.49306
	2PN_B	1	2.875	2.90321	-0.0282084	-0.0800704	0.372914	2.0907	3.71572	0.53056	1.74722	4.0592
	XPN_B	1	1.625	1.59985	0.0251512	0.0713924	0.342381	0.853865	2.34583	0.509562	0.489608	2.71009
	A_CC_C2	1	2.57143	2.19083	0.380601	1.08035	0.157762	1.84709	2.53456	0.409045	1.29959	3.08206
	D1	1	1.5	1.87657	-0.376565	-1.06889	0.328713	1.16036	2.59277	0.500481	0.786111	2.96702
	XPN_A	1	2.5	2.41718	0.0828248	0.235101	0.158182	2.07253	2.76182	0.409207	1.52559	3.30876
	Outliers analysis:
	Observation	DModX	DModY	Standardized dModX	Standardized dModY
	A1	0.571079	2.71584	1.4402	3.29275
	A2	0.547976	1.52797	1.38194	1.85256
	A_CC_C1	0.450533	2.84298	1.1362	3.44691
	A_CC_CC1	0.488623	2.14936	1.23226	2.60595
	A_CC_CC2	0.405641	2.33401	1.02299	2.82982
	C1	0.331126	2.1498	0.835067	2.60647
	C2	0.357664	0.836658	0.901993	1.01439
	D2	0.265769	3.6353	0.670244	4.40754
	E1	0.16058	3.48916	0.404967	4.23036
	E2	0.392944	3.10016	0.990967	3.75871
	2PN_A	0.28876	1.0065	0.728224	1.22031
	2PN_B	0.125902	0.354435	0.317513	0.429727
	XPN_B	0.472987	1.19498	1.19283	1.44883
	Outliers analysis:
	A_CC_C2	0.377446	1.03229	0.951881	1.25158
	D1	0.310167	0.916506	0.782211	1.1112
	XPN_A	1.64835	0.48489	4.15698	0.587894
	The outlier information corresponding to the validation set is displayed in the second part of the table
	Values of DModX and DModY that are greater than their respective critical values are displayed in bold (DCrit(X)=1.742 / DCrit(Y)=5.099)

## Sheet: visual & gustatory PLS
	Summary statistics:
	Variable	Observations	Obs. with missing data	Obs. without missing data	Minimum	Maximum	Mean	Std. deviation
	warmness	10	0	10	5.28571	6.83333	6.08393	0.511339
	astringency	10	0	10	3.66667	5.375	4.74821	0.516788
	sourness	10	0	10	3.83333	5.28571	4.53571	0.430011
	bitterness	10	0	10	3.28571	5	4.32976	0.535253
	clarity	10	0	10	6.33333	8.14286	7.42202	0.557002
	color tonality	10	0	10	2.5	3.71429	2.87202	0.386627
	color intensity	10	0	10	3	4.85714	3.80119	0.676469
	overall-intensity	10	0	10	5.375	6.71429	6.27321	0.428667
	y.3	10	0	10	7185	40157	15888.8	10866.1
	y.4	10	0	10	96914	295111	168400	67339.9
	y.6	10	0	10	5937	24892	9750.9	5799.55
	y.7	10	0	10	4003	12416	8945.6	3184.66
	y.8	10	0	10	21730	48279	28654.4	7815.65
	y.10	10	0	10	174332	411487	279536	88442.1
	y.12	10	0	10	8366	26090	13638.2	6355.11
	y.13	10	0	10	336171	672189	533706	120763
	y.14	10	0	10	2354313	3790496	3.07535e+06	536400
	y.15	10	0	10	750	5540	2501.9	1603.81
	y.16	10	0	10	77880	133365	101181	21048
	y.17	10	0	10	2046	7207	3935.3	1879.45
	y.18	10	0	10	4692	19268	11394.1	6346.08
	y.19	10	0	10	1755	17235	6619.1	5130.95
	y.21	10	0	10	1195	19253	11075	6695.49
	y.22	10	0	10	7288	57310	33009.7	16990
	y.23	10	0	10	9122	38218	23182.2	10133.7
	y.26	10	0	10	43648	156601	87491.9	41652.4
	y.27	10	0	10	15549	57713	32677.3	15567.7
	y.28	10	0	10	4198	29965	12522.7	9543.37
	y.29	10	0	10	3122	22511	10767	8609.13
	y.30	10	0	10	4438	15499	8387.7	5191.09
	y.31	10	0	10	1065	50533	18879.4	20959.2
	y.32	10	0	10	1975	35380	13416.7	14602.6
	y.33	10	0	10	660	15409	7726	7051.9
	y.34	10	0	10	312	25178	9154.7	10290.8
	y.35	10	0	10	697	18300	7550.1	7805.47
	y.36	10	0	10	1411	22782	8504.9	7863.02
	y.37	10	0	10	1197	18138	6592.4	5979.86
	y.38	10	0	10	2521	23487	10399.4	8551.21
	Total polyphenols	10	0	10	1188	2184	1670.6	316.21
	Lactic acid	10	0	10	1.734	2.687	2.0722	0.347235
	Tartaric acid	10	0	10	0.981	2.137	1.2836	0.412125
	Acetic acid	10	0	10	0.215	0.377	0.2763	0.0515343
	z.1	10	0	10	303.79	910.195	562.001	217.842
	z.2	10	0	10	558.176	9407.83	3369.85	3535.85
	z.3	10	0	10	27328.3	69477.2	49838.5	18846.3
	z.4	10	0	10	425.695	4019.91	2138.12	1529.22
	z.5	10	0	10	114.713	3656.88	1320.19	1319.44
	z.6	10	0	10	1763.32	16369.1	7193.75	6348.86
	z.7	10	0	10	6054.48	13366	8121.88	2319.33
	z.8	10	0	10	772.403	5625.6	2718.24	1241.57
	z.9	10	0	10	1625.75	3655.32	2703.81	680.246
	z.10	10	0	10	3973.73	13042.6	8500.72	3848.07
	z.11	10	0	10	53818.9	176623	90096.3	39116.8
	z.12	10	0	10	1621.85	4647.63	3344.45	1041.13
	z.13	10	0	10	3733.51	8171.97	5859.16	1828.99
	z.14	10	0	10	1297.25	4415.98	2651.72	1150.5
	z.15	10	0	10	224.875	4815.14	2939.04	1581.05
	z.16	10	0	10	10143.3	17858.4	13355.2	2491.86
	z.17	10	0	10	1278.93	2994.23	2196.28	433.154
	z.18	10	0	10	1622.33	3575.51	2554.83	682.581
	z.19	10	0	10	1682.16	3542.12	2513.26	686.06
	z.20	10	0	10	9148.61	29422.5	17821.3	7241.29
	z.21	10	0	10	1525.48	3688.11	2685.81	791.776
	z.22	10	0	10	13751.9	82615.4	38856.2	21637
	z.23	10	0	10	786.01	4559.7	2908.72	1509.91
	z.24	10	0	10	93.7894	3657.04	858.213	1361.5
	z.25	10	0	10	1505.1	3271.82	2475.09	573.893
	z.26	10	0	10	3881.36	7019.58	5127.88	1208.26
	z.27	10	0	10	130.708	3131.7	1404.12	915.886
	z.28	10	0	10	39025.3	61933.6	50692.3	7622.2
	z.29	10	0	10	1239.34	7524.01	4817.86	2261.86
	z.30	10	0	10	8130.24	21886.8	13025.3	4610.2
	z.31	10	0	10	1558.58	3646.97	2384.66	854.033
	z.32	10	0	10	11833.6	33553.6	16743	6610.8
	z.33	10	0	10	1880.72	6186.42	3025.77	1242.01
	z.34	10	0	10	595.975	3140.37	2560.92	790.37
	z.35	10	0	10	2273.58	4470.06	3311.84	788.385
	z.36	10	0	10	5499.84	11173.4	7589.89	1588.5
	z.37	10	0	10	3676.54	7910.17	6206.24	1420.31
	z.38	10	0	10	1937.5	3314.13	2441.5	452.748
	z.39	10	0	10	387.576	3914.42	1795.49	1228.14
	z.40	10	0	10	5701.12	13038.8	10013.3	2709.67
	z.41	10	0	10	514.932	10726.6	2685.2	3002.53
	z.42	10	0	10	3629.75	15737.6	9343.67	3954.63
	z.43	10	0	10	35495.5	41347.6	38432.6	2097.94
	z.44	10	0	10	424.601	3474.07	1143.42	893.757
	z.45	10	0	10	3669.35	7183.82	4617.51	1076.95
	z.46	10	0	10	761.966	3528.11	1269.82	807.125
	z.47	10	0	10	1627.82	2967.09	2526.08	440.774
	z.48	10	0	10	2414.07	11454.9	7191.53	3136.92
	z.49	10	0	10	39051.7	120242	75137.6	31465.8
	z.50	10	0	10	2051.76	3059	2431.61	329.552
	z.51	10	0	10	15386.6	39253.7	31602.5	6579.38
	z.52	10	0	10	31182.8	41707.7	36120.4	3214.58
	z.53	10	0	10	2371.42	5447.16	4156.64	938.461
	z.54	10	0	10	5989.79	17314.1	12536.3	4363.9
	z.55	10	0	10	2824.34	5573.07	3426.44	798.251
	z.56	10	0	10	42758.2	99799.7	82967.5	20431.5
	z.57	10	0	10	1302.81	3015.79	2284.33	598.044
	z.58	10	0	10	7393.3	11905.9	10876.1	1358.24
	z.59	10	0	10	4022.18	12672.9	8564.98	2734.65
	z.60	10	0	10	838.574	9073.4	3088.26	2415.49
	z.61	10	0	10	292.241	4565.73	2728.18	1137.84
	z.62	10	0	10	2345.14	13130.7	7867.09	3212.39
	z.63	10	0	10	656.69	4288.78	2217.74	1527.99
	z.64	10	0	10	4194.54	8638.18	5437.36	1295.49
	z.65	10	0	10	45362.8	76927.4	63863.4	9125.08
	z.66	10	0	10	1987.54	4605.05	2758	793.515
	z.67	10	0	10	6199.66	15915.8	10197.4	3063.13
	z.68	10	0	10	1122.93	5165.77	3030.84	1338.43
	z.69	10	0	10	9801.47	16602.3	14225.3	2492
	z.70	10	0	10	342.309	12816.3	4529.45	3818.71
	z.71	10	0	10	2969.61	5308.52	4080.4	735.474
	z.72	10	0	10	3558.95	5668.17	4296.74	634.337
	z.73	10	0	10	1585.27	2992.44	1999.59	468.767
	z.74	10	0	10	111.166	4833.19	1514.56	1730.38
	z.75	10	0	10	783.411	15720.6	4968.24	4320.69
	z.76	10	0	10	399.735	5018.39	2345.53	1587.92
	z.77	10	0	10	8204	40134.9	17794.9	9571.55
	z.78	10	0	10	1621.04	4090.21	2706.92	962.651
	z.79	10	0	10	1216.62	3387.61	2255.42	751.432
	z.80	10	0	10	3031.68	5207.68	4313.17	845.245
	z.81	10	0	10	564.868	3645.68	1444.2	879.837
	z.82	10	0	10	1055.44	3811.83	2167.08	956.365
	z.83	10	0	10	1528.12	14052.2	5900.06	3689.62
	z.84	10	0	10	7737.29	27199.3	15134.8	6801.75
	z.85	10	0	10	2064.72	10143.1	6953.11	2765.73
	z.86	10	0	10	8850.76	18513.4	14714.6	2714.76
	z.87	10	0	10	941.785	3254.87	1811.03	750.69
	z.88	10	0	10	1372.17	4563.53	2297.09	922.238
	z.89	10	0	10	171483	226978	191190	19416.1
	z.90	10	0	10	3853.5	8536.41	6344.69	1343.62
	z.91	10	0	10	976.98	2960.97	2033.58	633.626
	z.92	10	0	10	5348.11	11482.9	7919.35	1804.91
	z.93	10	0	10	51.4122	3305.71	1626.47	1415.39
	z.94	10	0	10	3705.93	7934.05	5333.85	1289.56
	z.95	10	0	10	2320.57	5198.95	3618.36	977.058
	z.96	10	0	10	1651.9	6704.24	3979.45	1568.13
	z.97	10	0	10	861.288	16293.5	9840.6	4793.43
	z.98	10	0	10	871.793	38151	16226.7	11509.2
	z.99	10	0	10	1691.2	3106.55	2351.2	458.685
	z.100	10	0	10	1277.54	3227.95	2024.49	654.329
	z.101	10	0	10	8325.43	14669.3	12135	2134.37
	z.102	10	0	10	2549.6	7534.86	4176.77	1847.4
	z.103	10	0	10	175.745	12614.9	6148.24	3992.78
	z.104	10	0	10	213.651	6897.79	2297.47	2859.73
	z.105	10	0	10	19396.3	40312.4	28954.1	6837.81
	z.106	10	0	10	687.353	4731.8	2679	1329.37
	z.107	10	0	10	279.213	2946.01	1194.16	818.712
	z.108	10	0	10	1405.15	3458.85	2202.26	727.573
	z.109	10	0	10	1099.73	4612.05	3198.27	1208.44
	z.110	10	0	10	3588.09	7550.64	5356.99	1355.5
	z.111	10	0	10	2043.36	4510.97	3215.52	1045.89
	z.112	10	0	10	123.522	3112.38	1279.19	965.032
	z.113	10	0	10	2927.28	11200.5	5872.44	3158.45
	z.114	10	0	10	1354.39	15855.6	6979.14	5552.31
	z.115	10	0	10	2799.57	10235.7	5044.7	2407.7
	z.116	10	0	10	2708.71	8158.14	4226.73	1766.2
	z.117	10	0	10	2544.64	8776.61	4773.8	2055.59
	z.118	10	0	10	166.919	5470.44	1173.87	1561.94
	z.119	10	0	10	21203.1	27245.3	24870.3	1637.38
	z.120	10	0	10	7226.93	7843.86	7566.72	192.821
	z.121	10	0	10	4794.48	6560.84	5216.67	500.886
	z.122	10	0	10	2116.42	4506.42	3459.74	908.707
	z.123	10	0	10	85.1472	10794.1	4298.93	2996.66
	z.124	10	0	10	1906.31	16125.9	7490.43	3697.15
	z.125	10	0	10	5473.3	9266.98	7043.98	1428.41
	z.126	10	0	10	4288.67	10859.4	6245.37	1926.85
	z.127	10	0	10	12475.4	19673.9	16110.1	2314.74
	z.128	10	0	10	1392.75	3168.26	2453.06	598.629
	z.129	10	0	10	2580.75	6908.57	3848.27	1261.65
	z.130	10	0	10	99008.2	158482	125338	20372.2
	z.131	10	0	10	12264.2	20604.6	14950.7	2777.33
	z.132	10	0	10	2072.02	6188.1	3587.28	1420.48
	z.133	10	0	10	5528.94	10342.4	8214.21	1763.46
	z.134	10	0	10	4238.8	7775.34	5945.17	1485.69
	z.135	10	0	10	536.423	2961.38	1164.57	830.247
	z.136	10	0	10	1824.64	4202.92	2473.99	756.882
	z.137	10	0	10	975.019	5557.88	2672.18	2038.43
	z.138	10	0	10	4639.72	9567.55	6122.47	1350.68
	z.139	10	0	10	754.817	4091.33	2056.67	933.5
	z.140	10	0	10	3523.93	9911.87	4752.94	2048.86
	z.141	10	0	10	317.779	4225.81	2934.94	1131.21
	z.142	10	0	10	5611.15	33122.6	14672.5	10618.3
	z.143	10	0	10	386	3027.16	1479.8	1052.05
	z.144	10	0	10	1076.62	3813.91	2485.86	929.455
	z.145	10	0	10	630.097	8783	5041.4	2666.98
	z.146	10	0	10	4116.34	8370.22	5463.56	1165.81
	z.147	10	0	10	5841.49	7806.79	6924.68	691.858
	z.148	10	0	10	2644.42	6278.69	3243.37	1101.7
	z.149	10	0	10	69.7592	3042.55	1613.3	1300.4
	z.150	10	0	10	2255.07	7481.75	4917.3	1480.71
	z.151	10	0	10	1808.35	20390.2	8476.45	6281.56
	z.152	10	0	10	793.695	4598.73	2176.67	1365.82
	z.153	10	0	10	392.073	2936.5	930.045	763.967
	z.154	10	0	10	1347.25	4816.08	1988.87	1041.69
	z.155	10	0	10	1945.37	4882.41	3309.65	928.87
	z.156	10	0	10	3374.12	11168.8	6450.9	2530.95
	Correlation matrix:
	Variables	y.3	y.4	y.6	y.7	y.8	y.10	y.12	y.13	y.14	y.15	y.16	y.17	y.18	y.19	y.21	y.22	y.23	y.26	y.27	y.28	y.29	y.30	y.31	y.32	y.33	y.34	y.35	y.36	y.37	y.38	Total polyphenols	Lactic acid	Tartaric acid	Acetic acid	z.1	z.2	z.3	z.4	z.5	z.6	z.7	z.8	z.9	z.10	z.11	z.12	z.13	z.14
	y.3	1	0.886798	0.853397	0.00183859	0.807952	0.743116	0.521859	0.425822	0.542726	-0.0408687	-0.391784	0.16015	0.622898	0.508245	0.620264	0.604195	0.522529	0.535477	0.384188	0.613452	0.810591	0.673256	0.686068	0.624545	0.586708	0.650809	0.646441	0.565765	0.550668	0.696319	-0.164991	-0.278715	0.906271	-0.364221	-0.322417	-0.00362877	-0.662548	-0.628166	0.890204	0.540537	0.222321	-0.217295	0.386771	-0.572939	-0.0868094	-0.844607	-0.546894	-0.693527
	y.4	0.886798	1	0.840333	-0.300167	0.838159	0.945273	0.632522	0.244129	0.779011	0.0372082	-0.137269	0.387599	0.831028	0.726783	0.761227	0.781452	0.728777	0.777997	0.636824	0.792337	0.913747	0.77441	0.83842	0.75235	0.835494	0.784509	0.781949	0.720797	0.716816	0.84895	-0.417891	0.010981	0.916343	-0.30472	-0.462872	0.277677	-0.818701	-0.808334	0.964085	0.416853	0.395149	-0.278908	0.216045	-0.841239	0.146099	-0.728272	-0.75618	-0.761973
	y.6	0.853397	0.840333	1	-0.00233434	0.920871	0.777347	0.69996	0.170984	0.652017	-0.0453604	-0.147226	0.384368	0.672749	0.455284	0.577765	0.593161	0.58273	0.550229	0.436611	0.546541	0.712757	0.600712	0.584727	0.511724	0.673962	0.539646	0.553795	0.508655	0.48669	0.617252	-0.340847	0.0563892	0.790539	-0.329636	-0.270126	0.116152	-0.736213	-0.693917	0.833652	0.355787	-0.143476	-0.349491	0.124342	-0.627056	-0.00118972	-0.61686	-0.61169	-0.611783
	y.7	0.00183859	-0.300167	-0.00233434	1	0.103504	-0.498208	-0.391185	0.649709	-0.726573	-0.344029	-0.579965	-0.815276	-0.693344	-0.466261	-0.597988	-0.570938	-0.694361	-0.610743	-0.629075	-0.422355	-0.433907	-0.357503	-0.451325	-0.434114	-0.655808	-0.423661	-0.480857	-0.412811	-0.407579	-0.433943	0.660547	-0.661573	-0.0318249	-0.0597396	0.708831	-0.943007	0.654559	0.707983	-0.371527	0.268202	-0.545034	0.467594	0.571726	0.579702	-0.336935	0.239204	0.656416	0.468304
	y.8	0.807952	0.838159	0.920871	0.103504	1	0.713244	0.475533	0.430281	0.53267	-0.278118	-0.360065	0.171293	0.519845	0.350067	0.367756	0.414956	0.386476	0.412661	0.287128	0.432711	0.602691	0.444042	0.467178	0.365732	0.547976	0.404361	0.39896	0.35309	0.344773	0.495414	-0.228539	-0.090526	0.872549	-0.527593	-0.109077	-0.0169038	-0.598214	-0.550336	0.813962	0.490453	-0.07437	-0.0308298	0.395337	-0.583719	-0.113488	-0.514213	-0.455009	-0.482328
	y.10	0.743116	0.945273	0.777347	-0.498208	0.713244	1	0.790132	-0.0488474	0.911535	0.271575	0.180993	0.612001	0.947355	0.826999	0.867958	0.89519	0.888747	0.914514	0.828229	0.882256	0.937518	0.858012	0.906458	0.844348	0.960253	0.865186	0.877138	0.837876	0.831515	0.915041	-0.54994	0.303996	0.738992	-0.151815	-0.638143	0.502078	-0.876055	-0.89487	0.890439	0.172685	0.39687	-0.467135	-0.0698224	-0.937524	0.320078	-0.625291	-0.890392	-0.794604
	y.12	0.521859	0.632522	0.69996	-0.391185	0.475533	0.790132	1	-0.381291	0.811898	0.551666	0.511385	0.734897	0.837579	0.637338	0.76482	0.785985	0.872764	0.782005	0.861978	0.73908	0.785276	0.838902	0.750169	0.784402	0.809985	0.76717	0.812656	0.791419	0.755541	0.757006	-0.569009	0.584309	0.323127	0.0214396	-0.568221	0.547488	-0.746054	-0.757909	0.586335	-0.115238	-0.0440221	-0.693005	-0.365736	-0.705472	0.366076	-0.343037	-0.735852	-0.546274
	y.13	0.425822	0.244129	0.170984	0.649709	0.430281	-0.0488474	-0.381291	1	-0.363087	-0.501225	-0.890356	-0.757865	-0.321687	-0.138503	-0.297779	-0.272867	-0.43346	-0.282056	-0.3932	-0.0757625	0.0325945	-0.0669511	-0.041093	-0.0890617	-0.306844	-0.0605554	-0.126374	-0.151642	-0.134611	-0.0469288	0.428321	-0.850825	0.545784	-0.454532	0.468767	-0.725982	0.259508	0.317824	0.193793	0.677419	0.100739	0.62399	0.961515	0.143133	-0.415989	-0.197724	0.373886	0.096378
	y.14	0.542726	0.779011	0.652017	-0.726573	0.53267	0.911535	0.811898	-0.363087	1	0.367827	0.372968	0.865379	0.964921	0.661693	0.825009	0.824323	0.919803	0.840872	0.814117	0.719788	0.814454	0.72362	0.758027	0.717384	0.94585	0.720601	0.771258	0.702116	0.684377	0.75942	-0.744172	0.57219	0.50412	-0.199224	-0.76758	0.781896	-0.943396	-0.962121	0.792338	-0.0556636	0.297885	-0.586508	-0.342826	-0.879977	0.218439	-0.547083	-0.899667	-0.767541
	y.15	-0.0408687	0.0372082	-0.0453604	-0.344029	-0.278118	0.271575	0.551666	-0.501225	0.367827	1	0.614615	0.429697	0.377369	0.425225	0.496749	0.460273	0.498877	0.474479	0.590865	0.4996	0.348908	0.573099	0.472722	0.585852	0.368307	0.542436	0.563915	0.608589	0.598533	0.445919	-0.309712	0.422664	-0.293494	0.402912	-0.642999	0.372466	-0.169847	-0.248718	-0.0691414	-0.533235	0.163783	-0.66968	-0.560188	-0.334087	0.275125	-0.0924282	-0.416051	-0.37954
	y.16	-0.391784	-0.137269	-0.147226	-0.579965	-0.360065	0.180993	0.511385	-0.890356	0.372968	0.614615	1	0.659192	0.379032	0.378163	0.366047	0.39893	0.51944	0.461065	0.625013	0.320891	0.11713	0.295694	0.25182	0.319511	0.400104	0.289453	0.329186	0.399576	0.388739	0.254046	-0.34313	0.879047	-0.492057	0.564017	-0.432457	0.652303	-0.191043	-0.27681	-0.190104	-0.633892	0.00575745	-0.58336	-0.853117	-0.287445	0.693524	0.332086	-0.407505	-0.0391121
	y.17	0.16015	0.387599	0.384368	-0.815276	0.171293	0.612001	0.734897	-0.757865	0.865379	0.429697	0.659192	1	0.799098	0.417249	0.658205	0.639269	0.814384	0.642058	0.690466	0.437299	0.499417	0.458177	0.459988	0.455994	0.760787	0.44145	0.520823	0.464957	0.437654	0.464366	-0.760427	0.832558	0.0663947	-0.00513121	-0.721079	0.921778	-0.80071	-0.823792	0.456647	-0.366483	0.0635687	-0.683837	-0.70253	-0.616937	0.256882	-0.2746	-0.757727	-0.535751
	y.18	0.622898	0.831028	0.672749	-0.693344	0.519845	0.947355	0.837579	-0.321687	0.964921	0.377369	0.379032	0.799098	1	0.802812	0.928886	0.930247	0.972421	0.93147	0.878415	0.842734	0.905254	0.83479	0.875376	0.8349	0.981349	0.84344	0.879705	0.824702	0.809244	0.880565	-0.665924	0.482653	0.566332	-0.0384377	-0.737542	0.705065	-0.93977	-0.962877	0.824025	0.021646	0.393944	-0.623314	-0.312485	-0.895967	0.378447	-0.602863	-0.933542	-0.790898
	y.19	0.508245	0.726783	0.455284	-0.466261	0.350067	0.826999	0.637338	-0.138503	0.661693	0.425225	0.378163	0.417249	0.802812	1	0.891684	0.92717	0.821525	0.958282	0.853895	0.971658	0.829983	0.871271	0.942041	0.899859	0.85536	0.924293	0.898884	0.941385	0.955386	0.952163	-0.290522	0.228171	0.505102	0.369359	-0.584366	0.350561	-0.59059	-0.661499	0.595247	0.0499226	0.609178	-0.502526	-0.205053	-0.827693	0.708799	-0.457031	-0.829649	-0.680423
	y.21	0.620264	0.761227	0.577765	-0.597988	0.367756	0.867958	0.76482	-0.297779	0.825009	0.496749	0.366047	0.658205	0.928886	0.891684	1	0.983834	0.943513	0.948001	0.840534	0.911342	0.893174	0.883365	0.926797	0.895977	0.919488	0.910207	0.923212	0.905797	0.900721	0.934264	-0.521259	0.31006	0.512967	0.238432	-0.74347	0.53417	-0.815022	-0.846941	0.718546	-0.0403589	0.493705	-0.670009	-0.337787	-0.804052	0.471432	-0.671825	-0.92255	-0.837158
	y.22	0.604195	0.781452	0.593161	-0.570938	0.414956	0.89519	0.785985	-0.272867	0.824323	0.460273	0.39893	0.639269	0.930247	0.92717	0.983834	1	0.956801	0.976068	0.883649	0.943507	0.897553	0.899659	0.943068	0.909006	0.936471	0.927256	0.932974	0.932314	0.930415	0.953835	-0.506768	0.353585	0.524035	0.248409	-0.695211	0.518395	-0.791749	-0.818886	0.712167	-0.069424	0.478879	-0.586569	-0.297048	-0.816459	0.545945	-0.588276	-0.917664	-0.778337
	y.23	0.522529	0.728777	0.58273	-0.694361	0.386476	0.888747	0.872764	-0.43346	0.919803	0.498877	0.51944	0.814384	0.972421	0.821525	0.943513	0.956801	1	0.944006	0.926175	0.860633	0.868551	0.858704	0.874401	0.861428	0.952054	0.863883	0.898965	0.868816	0.853117	0.878802	-0.65771	0.563341	0.41918	0.125423	-0.741932	0.713111	-0.868208	-0.888922	0.699829	-0.15671	0.364003	-0.641011	-0.409669	-0.817368	0.478131	-0.504499	-0.912657	-0.723131
	y.26	0.535477	0.777997	0.550229	-0.610743	0.412661	0.914514	0.782005	-0.282056	0.840872	0.474479	0.461065	0.642058	0.93147	0.958282	0.948001	0.976068	0.944006	1	0.93211	0.961211	0.886517	0.89814	0.950548	0.915	0.958147	0.930567	0.933925	0.942723	0.944093	0.958243	-0.494206	0.418011	0.500689	0.22884	-0.70352	0.55915	-0.763649	-0.819326	0.687606	-0.0370597	0.519217	-0.593363	-0.313372	-0.896029	0.615353	-0.496678	-0.922308	-0.746396
	y.27	0.384188	0.636824	0.436611	-0.629075	0.287128	0.828229	0.861978	-0.3932	0.814117	0.590865	0.625013	0.690466	0.878415	0.853895	0.840534	0.883649	0.926175	0.93211	1	0.891689	0.830302	0.893589	0.882496	0.905114	0.877078	0.89391	0.916729	0.915174	0.90121	0.87603	-0.542672	0.599203	0.297144	0.188341	-0.652092	0.656281	-0.689133	-0.744548	0.547552	-0.133905	0.395313	-0.594455	-0.363222	-0.816961	0.630063	-0.270574	-0.79526	-0.545436
	y.28	0.613452	0.792337	0.546541	-0.422355	0.432711	0.882256	0.73908	-0.0757625	0.719788	0.4996	0.320891	0.437299	0.842734	0.971658	0.911342	0.943507	0.860633	0.961211	0.891689	1	0.913132	0.956802	0.988366	0.968568	0.871145	0.983275	0.96691	0.986715	0.990917	0.990692	-0.360195	0.217231	0.555162	0.236193	-0.613775	0.352088	-0.645256	-0.696222	0.662441	0.0587345	0.54667	-0.509417	-0.126387	-0.840876	0.58047	-0.516378	-0.82458	-0.71394
	y.29	0.810591	0.913747	0.712757	-0.433907	0.602691	0.937518	0.785276	0.0325945	0.814454	0.348908	0.11713	0.499417	0.905254	0.829983	0.893174	0.897553	0.868551	0.886517	0.830302	0.913132	1	0.94534	0.960176	0.938453	0.873951	0.945679	0.956462	0.895597	0.880187	0.955617	-0.48944	0.154598	0.726238	-0.0991487	-0.584278	0.417185	-0.822528	-0.830203	0.867641	0.265884	0.465692	-0.481932	0.0305537	-0.838294	0.307942	-0.681673	-0.791639	-0.751071
	y.30	0.673256	0.77441	0.600712	-0.357503	0.444042	0.858012	0.838902	-0.0669511	0.72362	0.573099	0.295694	0.458177	0.83479	0.871271	0.883365	0.899659	0.858704	0.89814	0.893589	0.956802	0.94534	1	0.97046	0.990375	0.82079	0.986661	0.988608	0.976886	0.962999	0.96392	-0.409053	0.223338	0.526059	0.123851	-0.588703	0.354611	-0.667312	-0.697691	0.669166	0.0860353	0.404749	-0.562421	-0.0903034	-0.778934	0.449351	-0.528111	-0.750906	-0.670999
	y.31	0.686068	0.83842	0.584727	-0.451325	0.467178	0.906458	0.750169	-0.041093	0.758027	0.472722	0.25182	0.459988	0.875376	0.942041	0.926797	0.943068	0.874401	0.950548	0.882496	0.988366	0.960176	0.97046	1	0.981666	0.879764	0.992683	0.985433	0.974335	0.972307	0.997382	-0.409422	0.182638	0.615238	0.133975	-0.628112	0.386274	-0.712525	-0.752604	0.738397	0.136606	0.563832	-0.517696	-0.0772363	-0.850881	0.491848	-0.596599	-0.824258	-0.748135
	y.32	0.624545	0.75235	0.511724	-0.434114	0.365732	0.844348	0.784402	-0.0890617	0.717384	0.585852	0.319511	0.455994	0.8349	0.899859	0.895977	0.909006	0.861428	0.915	0.905114	0.968568	0.938453	0.990375	0.981666	1	0.821198	0.996487	0.995898	0.983383	0.974254	0.970548	-0.411202	0.222965	0.499507	0.164052	-0.619488	0.39515	-0.653313	-0.693388	0.648034	0.0710606	0.517807	-0.547309	-0.107598	-0.785486	0.488316	-0.522236	-0.757108	-0.674282
	y.33	0.586708	0.835494	0.673962	-0.655808	0.547976	0.960253	0.809985	-0.306844	0.94585	0.368307	0.400104	0.760787	0.981349	0.85536	0.919488	0.936471	0.952054	0.958147	0.877078	0.871145	0.873951	0.82079	0.879764	0.821198	1	0.839328	0.86156	0.839391	0.834221	0.892375	-0.604416	0.481472	0.571422	0.0284673	-0.734868	0.650435	-0.890296	-0.931171	0.792793	-0.00185851	0.403544	-0.609702	-0.331344	-0.938436	0.453662	-0.561234	-0.964041	-0.803539
	y.34	0.650809	0.784509	0.539646	-0.423661	0.404361	0.865186	0.76717	-0.0605554	0.720601	0.542436	0.289453	0.44145	0.84344	0.924293	0.910207	0.927256	0.863883	0.930567	0.89391	0.983275	0.945679	0.986661	0.992683	0.996487	0.839328	1	0.993905	0.986885	0.981721	0.985831	-0.396368	0.194295	0.545526	0.17213	-0.614445	0.370832	-0.663842	-0.702376	0.676113	0.0881633	0.536463	-0.525066	-0.0880655	-0.801721	0.499953	-0.549723	-0.780333	-0.700202
	y.35	0.646441	0.781949	0.553795	-0.480857	0.39896	0.877138	0.812656	-0.126374	0.771258	0.563915	0.329186	0.520823	0.879705	0.898884	0.923212	0.932974	0.898965	0.933925	0.916729	0.96691	0.956462	0.988608	0.985433	0.995898	0.86156	0.993905	1	0.978129	0.966887	0.976629	-0.463024	0.263103	0.523726	0.132916	-0.649273	0.450563	-0.717324	-0.75266	0.694079	0.0667758	0.503542	-0.572496	-0.139086	-0.812317	0.472777	-0.555258	-0.798931	-0.708532
	y.36	0.565765	0.720797	0.508655	-0.412811	0.35309	0.837876	0.791419	-0.151642	0.702116	0.608589	0.399576	0.464957	0.824702	0.941385	0.905797	0.932314	0.868816	0.942723	0.915174	0.986715	0.895597	0.976886	0.974335	0.983383	0.839391	0.986885	0.978129	1	0.997551	0.972576	-0.374419	0.272697	0.451562	0.283768	-0.625464	0.370242	-0.614567	-0.665346	0.5897	-0.0223521	0.479595	-0.571609	-0.193921	-0.791104	0.583597	-0.468061	-0.794064	-0.674316
	y.37	0.550668	0.716816	0.48669	-0.407579	0.344773	0.831515	0.755541	-0.134611	0.684377	0.598533	0.388739	0.437654	0.809244	0.955386	0.900721	0.930415	0.853117	0.944093	0.90121	0.990917	0.880187	0.962999	0.972307	0.974254	0.834221	0.981721	0.966887	0.997551	1	0.971646	-0.35006	0.250202	0.45439	0.307824	-0.625085	0.347492	-0.590364	-0.645085	0.576261	-0.0311558	0.51238	-0.54634	-0.185974	-0.792002	0.597805	-0.464776	-0.795953	-0.680029
	y.38	0.696319	0.84895	0.617252	-0.433943	0.495414	0.915041	0.757006	-0.0469288	0.75942	0.445919	0.254046	0.464366	0.880565	0.952163	0.934264	0.953835	0.878802	0.958243	0.87603	0.990692	0.955617	0.96392	0.997382	0.970548	0.892375	0.985831	0.976629	0.972576	0.971646	1	-0.398027	0.185207	0.630814	0.154822	-0.617127	0.370539	-0.720164	-0.759407	0.747087	0.136934	0.536555	-0.5247	-0.0907123	-0.855876	0.512563	-0.600962	-0.841383	-0.756241
	Total polyphenols	-0.164991	-0.417891	-0.340847	0.660547	-0.228539	-0.54994	-0.569009	0.428321	-0.744172	-0.309712	-0.34313	-0.760427	-0.665924	-0.290522	-0.521259	-0.506768	-0.65771	-0.494206	-0.542672	-0.360195	-0.48944	-0.409053	-0.409422	-0.411202	-0.604416	-0.396368	-0.463024	-0.374419	-0.35006	-0.398027	1	-0.562465	-0.189532	0.17441	0.389442	-0.739613	0.749661	0.678143	-0.473567	0.223768	-0.0833028	0.393956	0.341184	0.48468	0.00759719	0.179935	0.495074	0.363927
	Lactic acid	-0.278715	0.010981	0.0563892	-0.661573	-0.090526	0.303996	0.584309	-0.850825	0.57219	0.422664	0.879047	0.832558	0.482653	0.228171	0.31006	0.353585	0.563341	0.418011	0.599203	0.217231	0.154598	0.223338	0.182638	0.222965	0.481472	0.194295	0.263103	0.272697	0.250202	0.185207	-0.562465	1	-0.332713	0.145901	-0.4552	0.821944	-0.40631	-0.449377	0.0216609	-0.580072	-0.13652	-0.47513	-0.756472	-0.366706	0.422623	0.271113	-0.447911	-0.0777682
	Tartaric acid	0.906271	0.916343	0.790539	-0.0318249	0.872549	0.738992	0.323127	0.545784	0.50412	-0.293494	-0.492057	0.0663947	0.566332	0.505102	0.512967	0.524035	0.41918	0.500689	0.297144	0.555162	0.726238	0.526059	0.615238	0.499507	0.571422	0.545526	0.523726	0.451562	0.45439	0.630814	-0.189532	-0.332713	1	-0.426769	-0.175265	-0.0284329	-0.630086	-0.591387	0.909382	0.65652	0.339569	-0.0090339	0.505006	-0.615476	-0.057287	-0.732312	-0.497455	-0.611778
	Acetic acid	-0.364221	-0.30472	-0.329636	-0.0597396	-0.527593	-0.151815	0.0214396	-0.454532	-0.199224	0.402912	0.564017	-0.00513121	-0.0384377	0.369359	0.238432	0.248409	0.125423	0.22884	0.188341	0.236193	-0.0991487	0.123851	0.133975	0.164052	0.0284673	0.17213	0.132916	0.283768	0.307824	0.154822	0.17441	0.145901	-0.426769	1	-0.0500118	-0.0695957	0.251836	0.187099	-0.4217	-0.448261	0.138836	-0.328087	-0.541215	0.0913868	0.721758	0.234119	-0.119685	0.0491765
	z.1	-0.322417	-0.462872	-0.270126	0.708831	-0.109077	-0.638143	-0.568221	0.468767	-0.76758	-0.642999	-0.432457	-0.721079	-0.737542	-0.584366	-0.74347	-0.695211	-0.741932	-0.70352	-0.652092	-0.613775	-0.584278	-0.588703	-0.628112	-0.619488	-0.734868	-0.614445	-0.649273	-0.625464	-0.625085	-0.617127	0.389442	-0.4552	-0.175265	-0.0500118	1	-0.67484	0.622494	0.719817	-0.455507	0.315325	-0.464758	0.65081	0.521221	0.696944	-0.188063	0.591696	0.839798	0.833457
	z.2	-0.00362877	0.277677	0.116152	-0.943007	-0.0169038	0.502078	0.547488	-0.725982	0.781896	0.372466	0.652303	0.921778	0.705065	0.350561	0.53417	0.518395	0.713111	0.55915	0.656281	0.352088	0.417185	0.354611	0.386274	0.39515	0.650435	0.370832	0.450563	0.370242	0.347492	0.370539	-0.739613	0.821944	-0.0284329	-0.0695957	-0.67484	1	-0.69577	-0.731705	0.363882	-0.323214	0.273949	-0.516064	-0.617242	-0.556277	0.256875	-0.145483	-0.621099	-0.387439
	z.3	-0.662548	-0.818701	-0.736213	0.654559	-0.598214	-0.876055	-0.746054	0.259508	-0.943396	-0.169847	-0.191043	-0.80071	-0.93977	-0.59059	-0.815022	-0.791749	-0.868208	-0.763649	-0.689133	-0.645256	-0.822528	-0.667312	-0.712525	-0.653313	-0.890296	-0.663842	-0.717324	-0.614567	-0.590364	-0.720164	0.749661	-0.40631	-0.630086	0.251836	0.622494	-0.69577	1	0.978693	-0.886008	-0.130612	-0.256689	0.545227	0.22783	0.790359	-0.124233	0.658256	0.833295	0.750956
	z.4	-0.628166	-0.808334	-0.693917	0.707983	-0.550336	-0.89487	-0.757909	0.317824	-0.962121	-0.248718	-0.27681	-0.823792	-0.962877	-0.661499	-0.846941	-0.818886	-0.888922	-0.819326	-0.744548	-0.696222	-0.830203	-0.697691	-0.752604	-0.693388	-0.931171	-0.702376	-0.75266	-0.665346	-0.645085	-0.759407	0.678143	-0.449377	-0.591387	0.187099	0.719817	-0.731705	0.978693	1	-0.859025	-0.127077	-0.329174	0.637316	0.313929	0.86865	-0.220216	0.660643	0.897129	0.803384
	z.5	0.890204	0.964085	0.833652	-0.371527	0.813962	0.890439	0.586335	0.193793	0.792338	-0.0691414	-0.190104	0.456647	0.824025	0.595247	0.718546	0.712167	0.699829	0.687606	0.547552	0.662441	0.867641	0.669166	0.738397	0.648034	0.792793	0.676113	0.694079	0.5897	0.576261	0.747087	-0.473567	0.0216609	0.909382	-0.4217	-0.455507	0.363882	-0.886008	-0.859025	1	0.466058	0.353238	-0.282071	0.197257	-0.775054	0.0173855	-0.784263	-0.720103	-0.749285
	z.6	0.540537	0.416853	0.355787	0.268202	0.490453	0.172685	-0.115238	0.677419	-0.0556636	-0.533235	-0.633892	-0.366483	0.021646	0.0499226	-0.0403589	-0.069424	-0.15671	-0.0370597	-0.133905	0.0587345	0.265884	0.0860353	0.136606	0.0710606	-0.00185851	0.0881633	0.0667758	-0.0223521	-0.0311558	0.136934	0.223768	-0.580072	0.65652	-0.448261	0.315325	-0.323214	-0.130612	-0.127077	0.466058	1	0.163713	0.134422	0.646039	-0.183167	-0.149917	-0.339521	0.10047	-0.0630313
	z.7	0.222321	0.395149	-0.143476	-0.545034	-0.07437	0.39687	-0.0440221	0.100739	0.297885	0.163783	0.00575745	0.0635687	0.393944	0.609178	0.493705	0.478879	0.364003	0.519217	0.395313	0.54667	0.465692	0.404749	0.563832	0.517807	0.403544	0.536463	0.503542	0.479595	0.51238	0.536555	-0.0833028	-0.13652	0.339569	0.138836	-0.464758	0.273949	-0.256689	-0.329174	0.353238	0.163713	1	-0.0362751	0.0885255	-0.469216	0.325747	-0.417319	-0.421159	-0.464562
	z.8	-0.217295	-0.278908	-0.349491	0.467594	-0.0308298	-0.467135	-0.693005	0.62399	-0.586508	-0.66968	-0.58336	-0.683837	-0.623314	-0.502526	-0.670009	-0.586569	-0.641011	-0.593363	-0.594455	-0.509417	-0.481932	-0.562421	-0.517696	-0.547309	-0.609702	-0.525066	-0.572496	-0.571609	-0.54634	-0.5247	0.393956	-0.47513	-0.0090339	-0.328087	0.65081	-0.516064	0.545227	0.637316	-0.282071	0.134422	-0.0362751	1	0.726339	0.566768	-0.362961	0.363695	0.665664	0.592518
	z.9	0.386771	0.216045	0.124342	0.571726	0.395337	-0.0698224	-0.365736	0.961515	-0.342826	-0.560188	-0.853117	-0.70253	-0.312485	-0.205053	-0.337787	-0.297048	-0.409669	-0.313372	-0.363222	-0.126387	0.0305537	-0.0903034	-0.0772363	-0.107598	-0.331344	-0.0880655	-0.139086	-0.193921	-0.185974	-0.0907123	0.341184	-0.756472	0.505006	-0.541215	0.521221	-0.617242	0.22783	0.313929	0.197257	0.646039	0.0885255	0.726339	1	0.206147	-0.433577	-0.11543	0.437772	0.214691
	z.10	-0.572939	-0.841239	-0.627056	0.579702	-0.583719	-0.937524	-0.705472	0.143133	-0.879977	-0.334087	-0.287445	-0.616937	-0.895967	-0.827693	-0.804052	-0.816459	-0.817368	-0.896029	-0.816961	-0.840876	-0.838294	-0.778934	-0.850881	-0.785486	-0.938436	-0.801721	-0.812317	-0.791104	-0.792002	-0.855876	0.48468	-0.366706	-0.615476	0.0913868	0.696944	-0.556277	0.790359	0.86865	-0.775054	-0.183167	-0.469216	0.566768	0.206147	1	-0.399762	0.528374	0.890947	0.783305
	z.11	-0.0868094	0.146099	-0.00118972	-0.336935	-0.113488	0.320078	0.366076	-0.415989	0.218439	0.275125	0.693524	0.256882	0.378447	0.708799	0.471432	0.545945	0.478131	0.615353	0.630063	0.58047	0.307942	0.449351	0.491848	0.488316	0.453662	0.499953	0.472777	0.583597	0.597805	0.512563	0.00759719	0.422623	-0.057287	0.721758	-0.188063	0.256875	-0.124233	-0.220216	0.0173855	-0.149917	0.325747	-0.362961	-0.433577	-0.399762	1	0.176183	-0.429128	-0.0783921
	z.12	-0.844607	-0.728272	-0.61686	0.239204	-0.514213	-0.625291	-0.343037	-0.197724	-0.547083	-0.0924282	0.332086	-0.2746	-0.602863	-0.457031	-0.671825	-0.588276	-0.504499	-0.496678	-0.270574	-0.516378	-0.681673	-0.528111	-0.596599	-0.522236	-0.561234	-0.549723	-0.555258	-0.468061	-0.464776	-0.600962	0.179935	0.271113	-0.732312	0.234119	0.591696	-0.145483	0.658256	0.660643	-0.784263	-0.339521	-0.417319	0.363695	-0.11543	0.528374	0.176183	1	0.638493	0.878471
	z.13	-0.546894	-0.75618	-0.61169	0.656416	-0.455009	-0.890392	-0.735852	0.373886	-0.899667	-0.416051	-0.407505	-0.757727	-0.933542	-0.829649	-0.92255	-0.917664	-0.912657	-0.922308	-0.79526	-0.82458	-0.791639	-0.750906	-0.824258	-0.757108	-0.964041	-0.780333	-0.798931	-0.794064	-0.795953	-0.841383	0.495074	-0.447911	-0.497455	-0.119685	0.839798	-0.621099	0.833295	0.897129	-0.720103	0.10047	-0.421159	0.665664	0.437772	0.890947	-0.429128	0.638493	1	0.887188
	z.14	-0.693527	-0.761973	-0.611783	0.468304	-0.482328	-0.794604	-0.546274	0.096378	-0.767541	-0.37954	-0.0391121	-0.535751	-0.790898	-0.680423	-0.837158	-0.778337	-0.723131	-0.746396	-0.545436	-0.71394	-0.751071	-0.670999	-0.748135	-0.674282	-0.803539	-0.700202	-0.708532	-0.674316	-0.680029	-0.756241	0.363927	-0.0777682	-0.611778	0.0491765	0.833457	-0.387439	0.750956	0.803384	-0.749285	-0.0630313	-0.464562	0.592518	0.214691	0.783305	-0.0783921	0.878471	0.887188	1
	z.15	-0.352814	-0.571481	-0.695468	0.155078	-0.582139	-0.691989	-0.720833	0.25013	-0.604126	-0.265226	-0.411036	-0.491526	-0.632835	-0.648628	-0.586726	-0.641129	-0.623813	-0.690224	-0.622212	-0.636524	-0.527315	-0.579534	-0.578644	-0.52063	-0.729218	-0.546299	-0.542979	-0.61965	-0.619324	-0.620937	0.358467	-0.430603	-0.371246	-0.215769	0.317272	-0.237192	0.532321	0.57123	-0.450202	0.0370793	0.123852	0.56491	0.359956	0.707964	-0.509513	0.163114	0.68513	0.472193
	z.16	0.543172	0.689015	0.579405	-0.743088	0.376429	0.819121	0.832808	-0.440548	0.931057	0.397961	0.418138	0.871158	0.945457	0.623716	0.855676	0.837075	0.9423	0.804489	0.817432	0.691626	0.82426	0.747586	0.749505	0.746008	0.872328	0.736482	0.799237	0.706246	0.675	0.745081	-0.737224	0.559121	0.413429	-0.0975546	-0.71649	0.801264	-0.934692	-0.930053	0.743669	-0.0725501	0.287096	-0.620115	-0.369565	-0.728894	0.25289	-0.557373	-0.823421	-0.682029
	z.17	-0.594427	-0.299816	-0.677032	-0.39448	-0.568044	-0.14855	-0.321656	-0.272848	-0.112938	0.213942	0.417572	-0.0318164	-0.103251	0.215731	-0.0244319	0.0297557	-0.0138597	0.121444	0.136269	0.0849347	-0.214833	-0.11136	0.00122038	0.00138381	-0.0235476	0.00778202	-0.0294991	0.0644364	0.111515	-0.0163858	0.0456851	0.227012	-0.41183	0.478559	-0.152724	0.204569	0.303013	0.22341	-0.403564	-0.46882	0.565334	0.190591	-0.25918	-0.00622481	0.459349	0.398053	-0.0158093	0.145573
	z.18	-0.466333	-0.61265	-0.490888	0.0163701	-0.676976	-0.515624	-0.0448897	-0.404828	-0.338732	0.259388	0.337342	0.0114091	-0.307962	-0.366781	-0.214895	-0.230938	-0.131354	-0.325437	-0.106217	-0.327642	-0.326462	-0.183587	-0.322366	-0.175925	-0.421468	-0.228059	-0.189041	-0.200274	-0.23114	-0.34522	-0.0660437	0.208728	-0.685988	0.335828	0.235746	0.0680783	0.305294	0.376317	-0.549586	-0.490829	-0.29601	0.0251587	-0.253844	0.626506	0.00356486	0.431847	0.432606	0.527115
	z.19	-0.625823	-0.868263	-0.657843	0.44039	-0.726899	-0.878197	-0.59607	-0.0971129	-0.76469	0.0698408	-0.0857856	-0.458833	-0.788898	-0.677852	-0.627062	-0.713032	-0.725057	-0.752862	-0.710519	-0.711718	-0.789009	-0.658534	-0.731513	-0.654982	-0.801358	-0.682399	-0.686746	-0.637562	-0.635079	-0.73942	0.459773	-0.290886	-0.735328	0.297315	0.361856	-0.451492	0.743219	0.728439	-0.82773	-0.247445	-0.387645	0.0686324	-0.168266	0.780004	-0.324874	0.386232	0.669192	0.487122
	z.20	-0.335838	-0.593979	-0.508138	0.363537	-0.558707	-0.668436	-0.440196	0.0669666	-0.674121	-0.213208	-0.12464	-0.462501	-0.576346	-0.445032	-0.411636	-0.406309	-0.443279	-0.52971	-0.450442	-0.457575	-0.463399	-0.392892	-0.458315	-0.378804	-0.657061	-0.39347	-0.405834	-0.398058	-0.405276	-0.46571	0.363429	-0.296814	-0.446999	0.302737	0.55237	-0.390538	0.54422	0.636367	-0.53935	-0.171199	-0.187071	0.45194	0.189003	0.828756	-0.0651497	0.342365	0.643754	0.629905
	z.21	-0.0300332	-0.367474	-0.347814	0.269005	-0.447589	-0.498666	-0.406577	0.180239	-0.489768	-0.062804	-0.379502	-0.389908	-0.405468	-0.375414	-0.183497	-0.263667	-0.333749	-0.434471	-0.46925	-0.339029	-0.247478	-0.245647	-0.285392	-0.22537	-0.517957	-0.23697	-0.241601	-0.290038	-0.297247	-0.303713	0.213941	-0.530367	-0.198549	0.141772	0.257673	-0.35967	0.308213	0.403154	-0.271541	-0.0474841	0.0117787	0.248343	0.230119	0.665936	-0.377514	-0.14797	0.444923	0.199075
	z.22	-0.294792	0.0677006	-0.0845637	-0.183731	0.0591185	0.199608	0.0015363	-0.164569	0.116206	0.00774368	0.408698	0.0710439	0.109321	0.405395	0.0636549	0.171297	0.116547	0.324568	0.27828	0.263526	-0.0379381	0.0352394	0.146127	0.0700437	0.277291	0.104804	0.0573567	0.196396	0.241084	0.171112	0.0879141	0.339668	-0.0402217	0.332575	-0.102711	0.108729	0.0852394	-0.0219716	-0.0945887	-0.187539	0.227474	0.0235071	-0.241808	-0.383037	0.619158	0.349567	-0.274853	-0.0111953
	z.23	-0.113265	-0.287732	-0.0499042	0.624283	0.0899402	-0.385352	-0.32686	0.316555	-0.521961	-0.48507	-0.22559	-0.503314	-0.517719	-0.349043	-0.548469	-0.474517	-0.524264	-0.445544	-0.43443	-0.394278	-0.455805	-0.423853	-0.450167	-0.474076	-0.448101	-0.455216	-0.494876	-0.417718	-0.408225	-0.420765	0.817688	-0.226332	-0.108719	-0.0714431	0.422628	-0.552792	0.546619	0.508718	-0.321354	0.159102	-0.408255	0.439779	0.295276	0.375741	0.00251249	0.300227	0.398102	0.424871
	z.24	-0.196872	-0.215378	-0.115696	-0.141594	-0.333106	-0.103763	0.238663	-0.384546	0.0900976	0.5518	0.257978	0.280052	0.0528002	-0.136515	0.115224	0.0403602	0.140481	-0.0305421	0.0906932	-0.0398014	0.0116281	0.113088	-0.00783954	0.102117	-0.0361833	0.0549123	0.105445	0.0694584	0.0399705	-0.0326369	-0.591479	0.217483	-0.360343	0.164417	-0.0575594	0.225314	-0.112757	-0.0367909	-0.182795	-0.401289	-0.238647	-0.376927	-0.357188	0.157724	-0.209858	0.0974996	0.0703783	0.0304776
	z.25	0.0453927	-0.279774	-0.121395	0.403643	-0.171534	-0.460828	-0.354694	0.289885	-0.457026	-0.333864	-0.511548	-0.376497	-0.413201	-0.519563	-0.300952	-0.34977	-0.377125	-0.528488	-0.550635	-0.456695	-0.270198	-0.334694	-0.391869	-0.356297	-0.53027	-0.360373	-0.354156	-0.425428	-0.443455	-0.396758	0.0681388	-0.502162	-0.056601	-0.0954071	0.503161	-0.402007	0.214042	0.375509	-0.15705	0.0688192	-0.276882	0.394641	0.38058	0.699427	-0.518365	-0.0571675	0.532884	0.332086
	z.26	-0.517796	-0.212557	-0.304035	-0.0172435	-0.0869311	-0.114693	-0.218659	-0.065786	-0.145796	-0.139242	0.290878	-0.123768	-0.20862	0.0214658	-0.339353	-0.242929	-0.230048	-0.0499068	0.0153414	-0.0990294	-0.324032	-0.259572	-0.194109	-0.230775	-0.0704517	-0.220768	-0.253332	-0.148197	-0.116738	-0.185391	0.210416	0.277326	-0.245532	0.103023	0.179119	0.00711922	0.340171	0.236754	-0.329632	-0.046229	0.024921	0.197394	-0.0999984	-0.123656	0.39023	0.628003	0.115728	0.347866
	z.27	-0.552918	-0.720345	-0.580868	0.06005	-0.782737	-0.599689	-0.267348	-0.482153	-0.411053	0.427223	0.299041	-0.0460096	-0.416025	-0.338704	-0.203058	-0.282411	-0.276185	-0.356615	-0.32406	-0.375512	-0.529623	-0.350517	-0.414625	-0.329459	-0.431237	-0.355959	-0.345647	-0.277316	-0.273409	-0.419942	0.259542	0.0568482	-0.772813	0.542291	-0.116813	-0.085349	0.46571	0.425144	-0.697379	-0.643589	-0.194421	-0.213765	-0.539388	0.540069	-0.0631442	0.189569	0.236543	0.153573
	z.28	0.416635	0.594734	0.487621	-0.497889	0.607925	0.585041	0.334121	0.00767507	0.679672	-0.281165	-0.0627375	0.527518	0.558912	0.145837	0.254502	0.287666	0.429756	0.331115	0.331387	0.196271	0.429273	0.192551	0.263964	0.185076	0.526439	0.19625	0.246187	0.121515	0.105708	0.261249	-0.464928	0.351625	0.531571	-0.718635	-0.351602	0.584909	-0.676276	-0.654626	0.694829	0.224646	0.158816	0.0438106	0.122312	-0.542316	-0.168131	-0.334058	-0.441228	-0.354932
	z.29	-0.461426	-0.375022	-0.239837	-0.289772	-0.506812	-0.110606	0.233739	-0.8417	0.0784242	0.593706	0.791504	0.436203	0.0888528	0.160132	0.224152	0.205205	0.243376	0.192199	0.225539	0.0777597	-0.177799	0.0284234	-0.00880348	0.0383712	0.135051	0.0255359	0.0446017	0.160443	0.164893	0.0104433	-0.0708304	0.57681	-0.622759	0.745519	-0.387417	0.309882	0.0572328	-0.0236773	-0.419188	-0.773223	-0.156921	-0.575081	-0.911868	0.0137417	0.465252	0.210675	-0.280436	-0.0924047
	z.30	0.329982	0.46937	0.502634	-0.6472	0.433239	0.556914	0.511094	-0.405908	0.795815	0.0141435	0.208053	0.829366	0.659883	0.12851	0.409082	0.384848	0.575458	0.381535	0.381495	0.179017	0.399152	0.213904	0.245956	0.193249	0.606796	0.1915	0.27352	0.155497	0.127141	0.250498	-0.629516	0.580128	0.305613	-0.502742	-0.586438	0.777151	-0.794227	-0.784756	0.610498	-0.0712787	-0.0157555	-0.361252	-0.329417	-0.528836	-0.163553	-0.416534	-0.600546	-0.512734
	z.31	0.713561	0.855939	0.575458	-0.209756	0.628375	0.786207	0.352148	0.33252	0.508191	-0.040976	-0.132095	0.0991529	0.640139	0.83904	0.68547	0.723964	0.558431	0.752001	0.544244	0.807477	0.766444	0.677816	0.806118	0.696737	0.704092	0.747201	0.698146	0.707603	0.731784	0.823178	-0.0815536	-0.178541	0.832974	0.0296734	-0.339537	0.0520683	-0.528494	-0.569204	0.755129	0.460857	0.63198	-0.152658	0.250203	-0.759376	0.429619	-0.600961	-0.663999	-0.651977
	z.32	0.0337526	-0.104437	-0.0684091	-0.0794708	-0.104709	-0.100184	-0.197503	-0.141202	-0.00049351	0.0112481	-0.0797969	0.0844451	-0.0537438	-0.119506	0.0187036	-0.0311566	-0.0571017	-0.0930598	-0.242124	-0.155886	-0.187458	-0.226111	-0.163506	-0.214401	-0.0304323	-0.191966	-0.191967	-0.175661	-0.156061	-0.150322	0.360572	-0.0566468	-0.0812158	-0.00533928	-0.47087	0.018325	0.0498557	-0.0149659	-0.0449414	-0.297234	0.0881573	-0.0312046	-0.215727	0.0793258	-0.222991	-0.395538	-0.207682	-0.368104
	z.33	-0.0666082	0.284622	0.25036	-0.717718	0.250791	0.461829	0.38232	-0.569087	0.698922	0.0357198	0.482199	0.798837	0.553126	0.204377	0.295332	0.320137	0.496784	0.402892	0.417909	0.163382	0.196708	0.0831157	0.160725	0.0916447	0.582961	0.0983646	0.157798	0.122731	0.11791	0.173285	-0.632173	0.773053	0.0735981	-0.217958	-0.473537	0.804346	-0.599743	-0.631652	0.344045	-0.253796	0.0306105	-0.313837	-0.521792	-0.557072	0.155177	-0.0109956	-0.55772	-0.311961
	z.34	-0.114021	-0.206957	-0.287536	0.633427	-0.0654923	-0.407144	-0.723161	0.672814	-0.690641	-0.45979	-0.58642	-0.868682	-0.605974	-0.145683	-0.42492	-0.391163	-0.630323	-0.393063	-0.581604	-0.23775	-0.398281	-0.387329	-0.293679	-0.364073	-0.505645	-0.315169	-0.415081	-0.316441	-0.264002	-0.277539	0.657901	-0.78017	0.0908899	0.193241	0.551453	-0.834067	0.636858	0.645659	-0.311067	0.267613	0.145228	0.623311	0.559575	0.393533	-0.0589763	0.134836	0.460006	0.280863
	z.35	0.315584	0.385765	0.64874	-0.0933633	0.604174	0.476141	0.662678	-0.192963	0.589652	0.170254	0.190218	0.560978	0.43848	0.0367651	0.194252	0.233735	0.404114	0.252966	0.350368	0.168185	0.305496	0.27885	0.180736	0.182665	0.436846	0.170748	0.226936	0.192528	0.159541	0.193925	-0.420249	0.530283	0.208529	-0.485357	-0.328797	0.366268	-0.492647	-0.471281	0.39147	-0.160027	-0.487701	-0.277785	-0.166705	-0.407342	-0.192356	-0.121525	-0.384449	-0.282133
	z.36	-0.134434	-0.179285	-0.135738	0.300381	0.00665286	-0.339816	-0.444339	0.32182	-0.468752	-0.789343	-0.289897	-0.45273	-0.383082	-0.255651	-0.441064	-0.405008	-0.450907	-0.371614	-0.383316	-0.368544	-0.308763	-0.419111	-0.361254	-0.412827	-0.381598	-0.393878	-0.417424	-0.432254	-0.432281	-0.342487	0.361241	-0.307656	0.0783624	-0.0385922	0.753601	-0.340742	0.283534	0.313901	-0.114668	0.601447	-0.106282	0.430347	0.384935	0.321018	0.147372	0.345745	0.482626	0.57785
	z.37	-0.747422	-0.816503	-0.617406	0.0956887	-0.714851	-0.645734	-0.152382	-0.483678	-0.390653	0.408902	0.423766	-0.000195441	-0.498695	-0.564177	-0.500092	-0.525864	-0.374261	-0.50302	-0.250829	-0.535243	-0.620562	-0.421296	-0.569004	-0.427052	-0.528825	-0.488406	-0.448463	-0.408894	-0.427758	-0.593136	0.124776	0.350235	-0.927772	0.187451	0.0808497	0.0498948	0.536984	0.502987	-0.801149	-0.606825	-0.479055	-0.0814066	-0.444783	0.542186	-0.147126	0.625379	0.469291	0.519239
	z.38	0.476443	0.18109	0.436744	0.755844	0.572043	-0.0548303	-0.103135	0.731016	-0.261855	-0.466051	-0.716323	-0.496186	-0.276883	-0.312552	-0.317821	-0.283534	-0.351299	-0.343779	-0.402486	-0.20591	-0.0455945	-0.117646	-0.180939	-0.212189	-0.274585	-0.190424	-0.220265	-0.236683	-0.243829	-0.162888	0.461082	-0.555093	0.418097	-0.521919	0.366871	-0.649178	0.172193	0.242733	0.174708	0.421347	-0.423093	0.452186	0.707485	0.225403	-0.503912	-0.205587	0.286544	0.0774108
	z.39	0.273342	0.507059	0.201636	0.014785	0.439303	0.485166	0.139878	0.454832	0.215611	0.011656	-0.0778544	-0.176814	0.247854	0.541581	0.199334	0.314687	0.206685	0.438663	0.410058	0.54628	0.40978	0.429014	0.497513	0.449437	0.352075	0.476444	0.412829	0.471208	0.504309	0.491969	0.074447	-0.0834606	0.465325	-0.10884	-0.0886081	-0.0952512	-0.0580485	-0.108947	0.314441	0.237299	0.465392	0.254421	0.422145	-0.522187	0.330812	-0.014484	-0.249332	-0.172694
	z.40	-0.753131	-0.871873	-0.554946	0.154252	-0.65219	-0.789766	-0.419361	-0.483178	-0.52816	-0.0900131	0.234972	-0.0532076	-0.611549	-0.718079	-0.603048	-0.648723	-0.538138	-0.676595	-0.5804	-0.790088	-0.833932	-0.759687	-0.819878	-0.769214	-0.626896	-0.793949	-0.758357	-0.722802	-0.732947	-0.809204	0.235299	0.199573	-0.82413	0.237768	0.301994	-0.0625652	0.5158	0.512843	-0.763868	-0.444158	-0.591577	0.0176684	-0.465639	0.704453	-0.17666	0.545247	0.515177	0.55836
	z.41	0.120864	0.339264	-0.0297514	-0.182803	0.0082908	0.415797	0.175995	0.0792342	0.177673	0.384324	0.264854	-0.0659306	0.319159	0.791794	0.488498	0.557381	0.380416	0.628141	0.549246	0.727268	0.433572	0.566954	0.648079	0.629578	0.421298	0.654289	0.582605	0.695368	0.737498	0.645533	0.0821419	-0.0205117	0.203285	0.52353	-0.301587	-0.0141193	-0.0249781	-0.114544	0.125202	-0.0684043	0.68337	-0.0972183	-0.00592496	-0.478358	0.688659	-0.0844397	-0.415159	-0.311651
	z.42	-0.5907	-0.504465	-0.322111	0.0444395	-0.14808	-0.482917	-0.395385	-0.147749	-0.254761	-0.464011	0.00117959	-0.00577168	-0.455252	-0.728152	-0.721558	-0.690082	-0.503712	-0.615758	-0.481983	-0.759384	-0.675863	-0.759653	-0.763176	-0.77381	-0.448676	-0.787012	-0.746261	-0.773569	-0.781004	-0.761748	0.00411679	0.289583	-0.423872	-0.424887	0.376671	0.10648	0.291776	0.316146	-0.397301	-0.13651	-0.501008	0.402725	-0.0470875	0.390537	-0.362877	0.607347	0.480776	0.586527
	z.43	0.357323	0.523704	0.261708	-0.29599	0.315814	0.608164	0.570887	0.0921199	0.533485	0.436398	0.208393	0.273119	0.526767	0.507393	0.432087	0.513261	0.561182	0.569255	0.717214	0.639497	0.648759	0.700008	0.649009	0.706588	0.505499	0.684485	0.689477	0.660141	0.650218	0.614269	-0.346339	0.29353	0.296267	-0.237759	-0.403258	0.35325	-0.362731	-0.368081	0.410576	-0.0715885	0.359563	-0.0224659	0.188433	-0.528693	0.187127	-0.124344	-0.374628	-0.263722
	z.44	0.682528	0.724365	0.314052	-0.365259	0.395757	0.60209	0.163348	0.418538	0.45781	-0.046114	-0.36038	0.0763805	0.531735	0.509295	0.528873	0.506397	0.43005	0.495232	0.379036	0.559807	0.715736	0.54217	0.646955	0.595353	0.475843	0.611518	0.600991	0.486218	0.490595	0.619384	-0.245394	-0.300362	0.744847	-0.349298	-0.34957	0.205609	-0.534221	-0.522812	0.745144	0.516725	0.777563	0.0321827	0.454617	-0.528632	-0.0343723	-0.686587	-0.409783	-0.550512
	z.45	-0.121277	-0.0111138	0.0712448	-0.311225	0.000415883	0.16181	0.528449	-0.398258	0.394852	0.424256	0.445193	0.524514	0.256022	-0.12023	0.0291906	0.0505672	0.303104	0.0953468	0.401538	0.0265796	0.157911	0.213838	0.0612535	0.179697	0.17051	0.115792	0.19652	0.122189	0.0740537	0.0273337	-0.573026	0.669371	-0.262737	-0.346335	-0.196271	0.566307	-0.268131	-0.238828	0.0213763	-0.319117	-0.317275	-0.222639	-0.245044	-0.136237	-0.124647	0.276484	-0.0418153	0.128337
	z.46	0.133219	0.130235	0.162025	-0.34146	-0.0569789	0.2908	0.704396	-0.412742	0.440096	0.62176	0.491046	0.530525	0.433818	0.173749	0.361407	0.347193	0.521439	0.332232	0.598703	0.323305	0.442822	0.541697	0.373438	0.517034	0.310993	0.450617	0.522714	0.445235	0.389959	0.338309	-0.512274	0.52894	-0.147263	-0.0604731	-0.32306	0.527931	-0.382599	-0.364561	0.154513	-0.214124	-0.113092	-0.478292	-0.282451	-0.210641	0.0989022	-0.00582375	-0.205929	-0.0721469
	z.47	0.448223	0.130798	0.129989	0.608799	0.221268	-0.153163	-0.322942	0.824223	-0.382276	-0.315947	-0.862192	-0.656214	-0.308477	-0.221336	-0.176093	-0.210219	-0.359316	-0.327176	-0.439566	-0.121219	0.0442541	-0.0333697	-0.0554087	-0.0583779	-0.367391	-0.0440872	-0.0867675	-0.143372	-0.142115	-0.0667888	0.267892	-0.882917	0.412417	-0.297993	0.413635	-0.682994	0.190862	0.304163	0.142721	0.486206	0.0247484	0.460996	0.809027	0.348419	-0.54827	-0.34632	0.393902	0.0414893
	z.48	0.449495	0.618324	0.34712	-0.762585	0.30626	0.725167	0.549618	-0.259145	0.838325	0.333911	0.255353	0.702596	0.786048	0.51054	0.657964	0.650067	0.747283	0.669293	0.672278	0.573238	0.678495	0.573562	0.627154	0.60706	0.741365	0.601334	0.647463	0.55373	0.543251	0.605413	-0.487024	0.446339	0.383502	-0.320716	-0.846132	0.762005	-0.738188	-0.784103	0.659162	-0.0889813	0.524877	-0.337631	-0.192648	-0.710206	0.0774261	-0.565519	-0.745657	-0.694595
	z.49	0.641666	0.645181	0.601213	-0.308932	0.575212	0.543185	0.171433	0.102302	0.554066	-0.20849	-0.355044	0.366759	0.52755	0.25869	0.496854	0.432633	0.394196	0.35001	0.0739329	0.266008	0.443897	0.204698	0.333201	0.196472	0.517922	0.244347	0.259071	0.174126	0.180807	0.355667	-0.358927	-0.14057	0.696735	-0.339413	-0.446004	0.23209	-0.690889	-0.652724	0.745425	0.233751	0.253111	-0.194822	0.0366879	-0.45842	-0.290873	-0.83256	-0.588341	-0.765269
	z.50	0.899266	0.916236	0.829954	-0.233388	0.818301	0.81544	0.555122	0.272562	0.686805	-0.15005	-0.253099	0.356919	0.735116	0.522861	0.652406	0.675903	0.651374	0.608054	0.482715	0.609578	0.817698	0.632761	0.67851	0.599447	0.691732	0.631025	0.641582	0.545661	0.531356	0.690536	-0.414536	-0.0342502	0.890269	-0.406366	-0.320969	0.245431	-0.801938	-0.729362	0.945432	0.380341	0.258931	-0.0903826	0.319866	-0.603395	-0.0155319	-0.724209	-0.608013	-0.622564
	z.51	0.336583	0.529897	0.418192	-0.528223	0.426373	0.650768	0.573756	-0.260535	0.689544	0.0991341	0.391623	0.597559	0.654269	0.482264	0.457455	0.523676	0.623271	0.601722	0.654782	0.492023	0.519274	0.458525	0.491681	0.456158	0.670346	0.459713	0.490722	0.46202	0.451501	0.496511	-0.181512	0.579067	0.315763	-0.241498	-0.587923	0.609421	-0.553288	-0.633147	0.524325	-0.009947	0.233403	-0.243734	-0.194406	-0.672301	0.364403	-0.239893	-0.644729	-0.413874
	z.52	-0.0409391	-0.233354	-0.111928	0.218967	-0.0192166	-0.291643	-0.21389	0.198984	-0.155257	0.00330645	-0.349	-0.141704	-0.331301	-0.59686	-0.46736	-0.534253	-0.418157	-0.504905	-0.409383	-0.483214	-0.301361	-0.346287	-0.422775	-0.377497	-0.377028	-0.413026	-0.377707	-0.455637	-0.474318	-0.453073	0.238848	-0.147618	-0.157104	-0.655151	-0.0863547	-0.0939871	0.221733	0.189758	-0.147722	0.0939562	-0.276187	0.112096	0.188484	0.213203	-0.740098	-0.0593472	0.313694	0.0529396
	z.53	0.714899	0.853694	0.59235	-0.493227	0.599142	0.880716	0.64401	0.0699049	0.791854	0.200458	0.0952242	0.47516	0.82141	0.711703	0.71354	0.745927	0.757196	0.785341	0.761453	0.780131	0.871101	0.777475	0.82265	0.785263	0.806652	0.793456	0.805797	0.737066	0.72846	0.812171	-0.308164	0.228269	0.680004	-0.314086	-0.647707	0.486688	-0.725239	-0.771794	0.822868	0.259467	0.530647	-0.272994	0.103711	-0.834155	0.250108	-0.603071	-0.74489	-0.680209
	z.54	-0.701412	-0.88528	-0.620452	0.461194	-0.567813	-0.924686	-0.611482	-0.0157716	-0.769905	-0.304002	-0.138784	-0.440368	-0.857085	-0.92554	-0.888769	-0.904409	-0.808818	-0.925252	-0.761864	-0.929447	-0.884739	-0.836333	-0.93125	-0.85288	-0.90331	-0.886542	-0.867953	-0.868987	-0.883061	-0.941251	0.318287	-0.120347	-0.714695	-0.0637782	0.685325	-0.354094	0.719591	0.77995	-0.793095	-0.174688	-0.617294	0.446787	0.0660801	0.909787	-0.432473	0.690221	0.8982	0.859911
	z.55	-0.208961	0.103985	-0.0755098	-0.316049	-0.141924	0.332588	0.351641	-0.414615	0.266066	0.577055	0.705056	0.262399	0.336198	0.684136	0.440534	0.513644	0.446699	0.609513	0.617921	0.598308	0.242888	0.450821	0.482295	0.489639	0.457594	0.498412	0.461715	0.612187	0.642847	0.492649	-0.109308	0.45525	-0.165578	0.687847	-0.371728	0.238157	-0.0404707	-0.148985	-0.100998	-0.448525	0.323126	-0.372272	-0.501092	-0.459812	0.805142	0.210822	-0.469673	-0.206113
	z.56	0.480929	0.529455	0.404828	-0.416702	0.328495	0.580647	0.452849	-0.139206	0.554271	0.1953	0.197156	0.413303	0.592757	0.539544	0.53284	0.494143	0.499564	0.569106	0.515411	0.520701	0.559023	0.499539	0.550191	0.508641	0.604274	0.510546	0.528318	0.490078	0.480848	0.552446	0.044556	0.198585	0.401937	-0.105141	-0.644248	0.393978	-0.499472	-0.64452	0.543096	0.356654	0.384325	-0.574137	-0.212958	-0.715799	0.320633	-0.543071	-0.652714	-0.630216
	z.57	0.527925	0.243054	0.263908	0.149829	0.175027	0.119707	0.0899338	0.277425	0.0128874	0.0189214	-0.320367	-0.134494	0.0983234	0.100041	0.166608	0.0668021	0.00209192	0.0499755	-0.0172463	0.137408	0.282838	0.230878	0.2096	0.213358	0.0474563	0.204185	0.206297	0.139102	0.119174	0.202698	0.409489	-0.411197	0.335396	-0.180899	-0.209218	-0.181045	-0.107745	-0.189859	0.303994	0.614105	0.146232	-0.33626	0.184477	-0.16724	-0.118627	-0.582229	-0.119246	-0.358226
	z.58	0.0385953	-0.173663	0.0400949	0.226632	0.0507635	-0.316175	-0.142075	0.208494	-0.194345	-0.391185	-0.42203	-0.108501	-0.269701	-0.659296	-0.421312	-0.47558	-0.334818	-0.54382	-0.418548	-0.548256	-0.201243	-0.342185	-0.438271	-0.389088	-0.413178	-0.423581	-0.364939	-0.516033	-0.564211	-0.457401	-0.202385	-0.179941	-0.0081973	-0.592102	0.491477	-0.068554	-0.0107719	0.124299	0.0112014	0.338264	-0.474195	0.238165	0.349407	0.441322	-0.65728	0.0862367	0.526994	0.405579
	z.59	0.663288	0.82367	0.601597	-0.461827	0.560964	0.81252	0.562767	0.0455067	0.708537	0.01638	0.0415622	0.449414	0.795755	0.700456	0.768069	0.814283	0.78125	0.759909	0.663101	0.738385	0.826673	0.704356	0.775397	0.714028	0.763436	0.743055	0.747183	0.686212	0.682422	0.781898	-0.5881	0.14957	0.708607	-0.0766356	-0.340148	0.409136	-0.784341	-0.713119	0.811725	0.140421	0.456575	-0.122007	0.123624	-0.619973	0.288214	-0.526834	-0.655704	-0.541333
	z.60	-0.0649725	0.000633152	0.172903	-0.317987	-0.0465327	0.192581	0.62895	-0.560572	0.443776	0.598372	0.507424	0.633091	0.345847	-0.0247566	0.235835	0.208566	0.419682	0.188841	0.409958	0.111038	0.213908	0.301007	0.142299	0.255757	0.25846	0.198584	0.281338	0.22686	0.178245	0.122297	-0.715818	0.637173	-0.273281	-0.075285	-0.277818	0.545417	-0.379638	-0.33255	0.0371716	-0.436919	-0.385329	-0.514281	-0.478466	-0.140149	-0.0969848	0.108974	-0.181556	-0.0619644
	z.61	-0.72272	-0.758537	-0.512148	0.485485	-0.500287	-0.683988	-0.360809	-0.127397	-0.605526	0.174891	0.126555	-0.354398	-0.687652	-0.544847	-0.612705	-0.591724	-0.573829	-0.585332	-0.474355	-0.546326	-0.732351	-0.525682	-0.629538	-0.552266	-0.632813	-0.572328	-0.589343	-0.471625	-0.459967	-0.627589	0.205056	0.0160142	-0.740216	0.305753	0.425872	-0.403268	0.714401	0.736993	-0.841328	-0.557353	-0.573248	0.213058	-0.17328	0.634435	-0.177474	0.707594	0.591544	0.590425
	z.62	0.538783	0.771735	0.437614	-0.724866	0.425466	0.84976	0.594917	-0.105604	0.885101	0.361387	0.167975	0.635557	0.856277	0.645765	0.743645	0.74011	0.796966	0.773233	0.751485	0.721699	0.822342	0.715927	0.778529	0.750586	0.822771	0.749472	0.781241	0.688789	0.682587	0.753814	-0.658985	0.335504	0.548029	-0.312126	-0.745919	0.692704	-0.808895	-0.82926	0.768124	0.0512954	0.606739	-0.343959	-0.0635525	-0.828781	0.100431	-0.574562	-0.760118	-0.728558
	z.63	-0.630716	-0.828738	-0.667408	0.675483	-0.574941	-0.931716	-0.764665	0.258424	-0.963329	-0.31139	-0.2986	-0.774047	-0.952702	-0.718756	-0.834557	-0.838237	-0.894517	-0.86088	-0.800661	-0.763066	-0.841284	-0.743454	-0.797517	-0.74189	-0.947581	-0.753174	-0.789532	-0.729073	-0.717765	-0.801305	0.545482	-0.467695	-0.584504	0.204556	0.811761	-0.697805	0.898626	0.946144	-0.830567	-0.0404114	-0.395854	0.542865	0.258246	0.911648	-0.260999	0.640911	0.930659	0.826952
	z.64	0.202344	0.333596	0.0817239	-0.27126	-0.0683477	0.479281	0.48612	-0.19717	0.326557	0.698266	0.483147	0.191714	0.48599	0.837517	0.699268	0.73155	0.606328	0.741982	0.722562	0.82715	0.574307	0.766621	0.765982	0.805253	0.531775	0.806944	0.768226	0.862283	0.879571	0.760739	-0.0910844	0.164106	0.0886982	0.645964	-0.485753	0.150102	-0.190548	-0.266577	0.149804	-0.257266	0.527686	-0.434136	-0.266449	-0.480063	0.704312	-0.199685	-0.545348	-0.429298
	z.65	0.418884	0.275345	0.141503	0.511848	0.345096	0.0996539	-0.0784125	0.817314	-0.188027	-0.0800826	-0.571176	-0.574748	-0.150152	0.0524627	-0.113799	-0.0501097	-0.169425	-0.0534448	-0.0440477	0.177492	0.213514	0.231563	0.189421	0.21121	-0.14622	0.217121	0.159149	0.157243	0.16789	0.166858	0.358672	-0.566958	0.398181	-0.35606	0.180922	-0.533471	0.225607	0.261694	0.156367	0.328147	0.169399	0.528913	0.826232	0.0335857	-0.251501	-0.149225	0.216452	0.0285463
	z.66	0.0349121	0.00444715	-0.251378	0.168943	0.015827	-0.139467	-0.401341	0.581936	-0.246778	-0.323163	-0.490791	-0.45089	-0.269831	-0.205486	-0.298951	-0.227997	-0.26671	-0.250781	-0.220724	-0.140835	-0.0758342	-0.149701	-0.116726	-0.111785	-0.302777	-0.104332	-0.138152	-0.182174	-0.164193	-0.148988	0.141928	-0.37959	0.146001	-0.39376	0.259881	-0.24024	0.25404	0.341932	-0.0122128	0.0594259	0.296323	0.83861	0.721394	0.288821	-0.340527	0.0720548	0.373752	0.271536
	z.67	-0.0274886	0.218134	0.236074	-0.684515	0.149946	0.4014	0.569496	-0.595323	0.68474	0.19309	0.528534	0.835493	0.555175	0.082366	0.279909	0.292051	0.547129	0.334771	0.512657	0.13876	0.293886	0.218141	0.182283	0.208491	0.485796	0.174956	0.267509	0.169888	0.1301	0.170364	-0.802741	0.829455	-0.0369048	-0.315345	-0.353017	0.871187	-0.631231	-0.605815	0.317798	-0.240099	-0.12442	-0.352206	-0.442461	-0.398767	0.0498842	0.074514	-0.373687	-0.116307
	z.68	0.326792	0.593139	0.466937	-0.686386	0.358986	0.798379	0.83534	-0.475786	0.884151	0.464939	0.61651	0.823791	0.859362	0.659864	0.720998	0.779089	0.894689	0.820504	0.901877	0.711117	0.702664	0.712367	0.705662	0.709733	0.855836	0.701598	0.744939	0.7249	0.708458	0.703974	-0.590829	0.757157	0.249779	-0.036618	-0.715592	0.78065	-0.732482	-0.770407	0.551455	-0.292568	0.23865	-0.469921	-0.404177	-0.762779	0.43785	-0.245396	-0.798477	-0.529566
	z.69	-0.16194	-0.39343	-0.379311	0.799289	-0.202225	-0.620447	-0.724381	0.719268	-0.870249	-0.437491	-0.645012	-0.979834	-0.781294	-0.401654	-0.612045	-0.598411	-0.78131	-0.627534	-0.688352	-0.427666	-0.485149	-0.445999	-0.447355	-0.442539	-0.75532	-0.426241	-0.503933	-0.450722	-0.425279	-0.448842	0.676946	-0.839991	-0.0685373	0.0877223	0.773784	-0.916694	0.764174	0.812595	-0.452024	0.344402	-0.07417	0.663908	0.674135	0.658381	-0.229007	0.27275	0.762215	0.552153
	z.70	-0.556988	-0.402268	-0.537956	0.18984	-0.423643	-0.297751	-0.32186	-0.0329178	-0.416712	0.197162	0.297051	-0.381564	-0.377099	0.126583	-0.234768	-0.146209	-0.265944	-0.0517365	-0.0381067	0.0154839	-0.371839	-0.15323	-0.119729	-0.106121	-0.235528	-0.0927186	-0.166749	0.0151216	0.0652192	-0.114892	0.470391	0.014401	-0.446295	0.590868	0.111549	-0.306054	0.635374	0.54159	-0.604779	-0.409421	0.166427	0.241832	-0.114471	0.15589	0.475634	0.543568	0.176697	0.303104
	z.71	0.176834	0.179454	0.208468	-0.403809	-0.0808883	0.274039	0.354812	-0.468418	0.421278	0.494566	0.23657	0.525219	0.444727	0.27781	0.590214	0.484236	0.485703	0.368709	0.248161	0.29593	0.313474	0.32076	0.324972	0.325864	0.398727	0.325366	0.36127	0.337431	0.328708	0.330713	-0.580344	0.168966	0.0311083	0.321344	-0.488911	0.357894	-0.49526	-0.463571	0.230466	-0.337176	0.0922901	-0.643789	-0.540151	-0.219293	-0.0206121	-0.476331	-0.486214	-0.569369
	z.72	0.0123088	0.237329	0.240067	-0.807888	0.0609116	0.404753	0.443023	-0.738988	0.677822	0.105814	0.537545	0.883313	0.624494	0.245431	0.477356	0.433935	0.596438	0.438233	0.431256	0.190253	0.282383	0.164229	0.224743	0.181516	0.584092	0.178092	0.256453	0.183969	0.161396	0.237546	-0.699947	0.70508	0.0342908	0.0165409	-0.475069	0.857676	-0.714567	-0.726962	0.373503	-0.17966	0.0621858	-0.582584	-0.68207	-0.455525	0.232466	-0.188091	-0.581782	-0.367
	z.73	0.681909	0.636412	0.879621	-0.104837	0.669339	0.66769	0.869589	-0.155839	0.651823	0.174751	0.172374	0.564928	0.681956	0.389118	0.589282	0.595696	0.667504	0.53524	0.555369	0.500666	0.671675	0.636904	0.541297	0.542271	0.631764	0.538735	0.58559	0.531994	0.486651	0.565386	-0.43523	0.33021	0.483695	-0.173946	-0.289533	0.299735	-0.723518	-0.679074	0.659762	0.141072	-0.310512	-0.537376	-0.137913	-0.502157	0.115347	-0.438506	-0.556797	-0.45246
	z.74	-0.320527	-0.131934	-0.00969511	-0.634979	-0.173394	0.0959417	0.380435	-0.822225	0.477594	0.297903	0.62612	0.811537	0.326826	-0.127326	0.133685	0.102073	0.357349	0.11808	0.272012	-0.111323	-0.0278491	-0.0464562	-0.0901052	-0.0510231	0.269401	-0.0882531	0.00813316	-0.0518839	-0.0855796	-0.0957499	-0.692871	0.840696	-0.379978	-0.0805398	-0.360757	0.806301	-0.415601	-0.409162	-0.0110656	-0.505779	-0.276099	-0.456894	-0.723674	-0.148837	-0.0193817	0.175235	-0.257655	-0.0481008
	z.75	0.696874	0.644265	0.363042	-0.0865236	0.481848	0.414576	-0.0920605	0.607289	0.212799	-0.428767	-0.642456	-0.15949	0.305587	0.310405	0.330641	0.305607	0.171631	0.251334	0.0323297	0.318569	0.500938	0.265838	0.402717	0.298623	0.267382	0.340631	0.312012	0.208923	0.221083	0.398922	-0.054635	-0.567881	0.827169	-0.356507	-0.0417519	-0.095188	-0.402292	-0.349784	0.698707	0.674815	0.59329	0.233682	0.614321	-0.298416	-0.160995	-0.687719	-0.224988	-0.424597
	z.76	0.78857	0.69498	0.639737	0.0580546	0.76712	0.494081	0.172692	0.590082	0.375188	-0.360745	-0.646305	0.0171669	0.341675	0.0855344	0.223396	0.23433	0.216518	0.163121	0.0450717	0.212658	0.492056	0.266204	0.301819	0.226855	0.28933	0.254907	0.258015	0.13798	0.129094	0.300251	-0.196839	-0.334236	0.812646	-0.737486	-0.107028	-0.0345319	-0.492677	-0.392734	0.753415	0.446926	0.13124	0.291062	0.642473	-0.280509	-0.491741	-0.642677	-0.225614	-0.414655
	z.77	-0.620433	-0.776068	-0.555634	0.375863	-0.550841	-0.818518	-0.601781	-0.0996835	-0.76745	-0.476647	0.000167311	-0.434755	-0.727882	-0.603095	-0.68156	-0.682684	-0.67935	-0.695316	-0.635757	-0.728105	-0.781716	-0.744507	-0.760815	-0.739795	-0.732011	-0.745122	-0.751796	-0.708135	-0.709577	-0.7433	0.5448	-0.133837	-0.583087	0.296342	0.683235	-0.369868	0.660712	0.666332	-0.695906	0.00814761	-0.413217	0.314673	-0.0573356	0.763538	0.0619864	0.604493	0.694125	0.774685
	z.78	-0.412198	-0.629245	-0.486147	0.198702	-0.668451	-0.534718	-0.107255	-0.278422	-0.378022	0.578904	0.180426	-0.116167	-0.404344	-0.392095	-0.231661	-0.303416	-0.260278	-0.379098	-0.236631	-0.313949	-0.377965	-0.16959	-0.321573	-0.17394	-0.466422	-0.226275	-0.206507	-0.178029	-0.192848	-0.350405	0.121773	-0.00616302	-0.704349	0.299111	-0.0418488	-0.142296	0.447542	0.450783	-0.630733	-0.562555	-0.285344	-0.15309	-0.290208	0.544461	-0.267316	0.210271	0.36137	0.222447
	z.79	-0.602162	-0.726325	-0.684597	0.480578	-0.50292	-0.820366	-0.687157	0.308975	-0.803088	-0.341633	-0.289188	-0.670734	-0.848702	-0.752629	-0.887886	-0.879871	-0.839896	-0.833501	-0.652582	-0.751793	-0.720412	-0.680804	-0.745172	-0.665342	-0.884046	-0.700166	-0.709947	-0.721394	-0.725678	-0.775385	0.411834	-0.322623	-0.520391	-0.163916	0.76042	-0.450289	0.780514	0.81434	-0.692997	0.142367	-0.279999	0.611701	0.396589	0.758999	-0.336922	0.700084	0.954385	0.89227
	z.80	-0.694294	-0.865795	-0.693359	0.357046	-0.750228	-0.812601	-0.369777	-0.177555	-0.686771	0.132915	0.152057	-0.352966	-0.702182	-0.632406	-0.613262	-0.613115	-0.546528	-0.657594	-0.434764	-0.608086	-0.674879	-0.492073	-0.635328	-0.492291	-0.759996	-0.541077	-0.530641	-0.493036	-0.507604	-0.657627	0.257088	0.00449415	-0.839193	0.275687	0.482683	-0.273189	0.710352	0.757777	-0.852391	-0.456027	-0.446632	0.27972	-0.0832171	0.844026	-0.152609	0.685791	0.751334	0.774073
	z.81	-0.441709	-0.2106	-0.345898	-0.224202	-0.427886	0.00725404	0.0576406	-0.480893	-0.0133098	0.496209	0.668596	0.112675	0.0598574	0.459766	0.238904	0.288091	0.198881	0.350828	0.326595	0.326806	-0.0733026	0.151276	0.19758	0.205436	0.183359	0.217642	0.174282	0.347262	0.387096	0.212172	0.10961	0.346899	-0.412778	0.844991	-0.277028	0.101637	0.215951	0.103193	-0.383521	-0.588188	0.268371	-0.27123	-0.581777	-0.152197	0.733968	0.298892	-0.276261	-0.0622743
	z.82	0.0297224	-0.0746616	-0.0330377	0.51924	0.128124	-0.293551	-0.412167	0.639898	-0.420894	-0.437007	-0.675242	-0.570561	-0.426271	-0.409637	-0.426199	-0.431393	-0.490184	-0.473268	-0.502143	-0.350595	-0.207067	-0.290625	-0.306018	-0.312199	-0.45977	-0.305956	-0.331388	-0.378462	-0.378221	-0.315528	-0.0609184	-0.605933	0.186713	-0.314068	0.720275	-0.534809	0.245639	0.389308	-0.0589485	0.404722	-0.195614	0.527546	0.663265	0.404174	-0.510996	0.153002	0.590032	0.396104
	z.83	-0.572505	-0.75679	-0.491395	0.237923	-0.653762	-0.709876	-0.248875	-0.351491	-0.577839	-0.0321673	0.256011	-0.179233	-0.530387	-0.505197	-0.459814	-0.502921	-0.434674	-0.533419	-0.368233	-0.557255	-0.574556	-0.455804	-0.566108	-0.464989	-0.592229	-0.506462	-0.478645	-0.461599	-0.489873	-0.56564	0.2707	0.0715112	-0.707696	0.38356	0.487688	-0.157589	0.489938	0.494414	-0.672556	-0.120094	-0.490225	-0.0835591	-0.298966	0.665372	0.0901907	0.551915	0.578295	0.667826
	z.84	0.879829	0.95109	0.783886	-0.20719	0.846422	0.846035	0.526636	0.407069	0.675568	-0.0833346	-0.295306	0.253847	0.70467	0.557828	0.579033	0.594053	0.56759	0.610734	0.519787	0.650529	0.848037	0.676386	0.72298	0.652161	0.683958	0.672887	0.67575	0.57779	0.565862	0.720914	-0.356488	-0.095435	0.926517	-0.521773	-0.317973	0.209355	-0.733954	-0.714932	0.942165	0.600361	0.357999	-0.141613	0.41047	-0.752905	-0.0162652	-0.663723	-0.564803	-0.615828
	z.85	-0.173128	-0.379466	-0.382563	0.774399	-0.219404	-0.587284	-0.689825	0.677669	-0.859724	-0.400933	-0.562861	-0.969428	-0.745904	-0.304645	-0.559195	-0.540598	-0.739944	-0.553179	-0.618007	-0.353191	-0.452649	-0.391771	-0.385696	-0.383182	-0.704665	-0.365138	-0.448834	-0.377473	-0.349313	-0.383851	0.715833	-0.808431	-0.0740533	0.192491	0.751982	-0.907928	0.766879	0.792124	-0.458269	0.36083	-0.0275298	0.593593	0.615615	0.596298	-0.0881325	0.291312	0.709634	0.535887
	z.86	-0.237179	-0.355751	-0.382803	0.413772	-0.467459	-0.324507	-0.0596785	0.0990709	-0.501337	0.409079	0.166732	-0.483672	-0.343007	0.111455	-0.0906352	-0.0691819	-0.193016	-0.0733206	0.0398194	0.118098	-0.100395	0.167746	0.0579247	0.178807	-0.333144	0.151772	0.100684	0.206315	0.211117	0.0420288	0.388293	-0.2415	-0.380582	0.623106	0.298681	-0.466783	0.555808	0.530651	-0.511504	-0.116706	0.0159734	-0.00276003	0.0622595	0.325906	0.370433	0.362722	0.353022	0.367877
	z.87	0.725975	0.649999	0.461061	0.127175	0.549975	0.411306	-0.0252983	0.664125	0.12009	-0.425061	-0.625047	-0.268553	0.263406	0.384495	0.348918	0.353442	0.166992	0.279192	0.0458038	0.389079	0.507118	0.332831	0.441578	0.339986	0.251829	0.391091	0.341935	0.28878	0.303627	0.453319	0.0102136	-0.624993	0.843067	-0.166156	0.121125	-0.294123	-0.325456	-0.251489	0.646406	0.649732	0.446001	0.2415	0.64417	-0.244696	-0.0241065	-0.603202	-0.191799	-0.350332
	z.88	0.792887	0.778354	0.889745	0.104421	0.940887	0.609713	0.360336	0.422549	0.443315	-0.460647	-0.440429	0.136334	0.46106	0.262325	0.328337	0.351237	0.314556	0.31573	0.154329	0.313127	0.532632	0.322627	0.367064	0.250202	0.463449	0.293805	0.293887	0.223973	0.211592	0.401285	-0.24212	-0.182451	0.882965	-0.48823	0.0418279	-0.0454605	-0.610897	-0.534731	0.81336	0.605938	-0.0970135	-0.0114106	0.404049	-0.459776	-0.135034	-0.53177	-0.367552	-0.405657
	z.89	-0.107416	0.261301	0.168608	-0.585964	0.0878683	0.471898	0.405094	-0.602407	0.515471	0.183898	0.711338	0.594469	0.54722	0.627909	0.506397	0.563791	0.575061	0.651144	0.594197	0.486307	0.271871	0.305172	0.406667	0.33458	0.649247	0.361504	0.363287	0.44871	0.46719	0.440398	-0.321865	0.659869	0.028159	0.471085	-0.396609	0.54508	-0.404003	-0.492958	0.190043	-0.271338	0.228246	-0.4596	-0.645213	-0.598785	0.782435	0.0718084	-0.654511	-0.304284
	z.90	0.319669	0.198605	0.248277	-0.127986	0.208489	0.153503	0.246941	0.0884157	0.323603	0.176377	-0.275042	0.26628	0.189501	-0.286866	0.039538	-0.0454551	0.115091	-0.093982	0.0110104	-0.0932507	0.238313	0.126284	0.0298861	0.0909974	0.0527572	0.0470994	0.119069	-0.0472186	-0.0918284	-0.0102491	-0.495043	0.00796907	0.168446	-0.709424	-0.20953	0.274769	-0.37708	-0.299822	0.328777	0.123824	-0.150549	-0.128928	0.166749	-0.0638584	-0.724214	-0.34178	0.00733153	-0.207552
	z.91	-0.621324	-0.502222	-0.663659	0.059382	-0.658128	-0.393443	-0.25836	-0.136065	-0.430944	0.359431	0.346949	-0.321124	-0.362868	0.0364164	-0.225492	-0.221264	-0.273471	-0.117745	0.00705535	-0.0399081	-0.296568	-0.0812805	-0.106528	-0.0192076	-0.317208	-0.0495863	-0.0841135	0.0124373	0.0299687	-0.131171	0.174063	0.000459007	-0.55941	0.573692	0.250811	-0.158191	0.546666	0.469218	-0.626996	-0.141776	0.170696	-0.0555504	-0.181825	0.196381	0.409918	0.603139	0.350768	0.438143
	z.92	0.0219368	-0.0354936	-0.044423	0.471258	0.144108	-0.209181	-0.252565	0.590903	-0.399025	-0.509573	-0.430608	-0.543638	-0.344529	-0.23887	-0.386239	-0.296223	-0.337172	-0.318067	-0.235473	-0.191772	-0.102821	-0.141051	-0.177945	-0.158825	-0.380052	-0.155316	-0.187435	-0.211178	-0.216034	-0.185456	0.0762642	-0.377832	0.158109	-0.218521	0.785579	-0.445835	0.276036	0.414687	-0.0603273	0.339846	-0.145673	0.712286	0.729978	0.389313	-0.119264	0.368657	0.574248	0.608821
	z.93	-0.633627	-0.798638	-0.698178	0.701365	-0.534153	-0.885169	-0.752673	0.342506	-0.951517	-0.24741	-0.282638	-0.829299	-0.963758	-0.672504	-0.875882	-0.848295	-0.905072	-0.826887	-0.730783	-0.700812	-0.821648	-0.693239	-0.752083	-0.688465	-0.9328	-0.702254	-0.749885	-0.670804	-0.652755	-0.763366	0.670844	-0.439876	-0.583794	0.123678	0.728166	-0.714872	0.979639	0.991955	-0.850118	-0.06742	-0.323362	0.632739	0.340469	0.834146	-0.23448	0.687664	0.915992	0.822488
	z.94	-0.426429	-0.307762	-0.468877	0.268315	-0.29714	-0.251165	-0.357372	0.155264	-0.406285	0.158257	0.112594	-0.466818	-0.389144	0.0987254	-0.26418	-0.177676	-0.311492	-0.0807858	-0.0891478	0.0198899	-0.328663	-0.139301	-0.101624	-0.0981518	-0.245925	-0.0812931	-0.162	0.00453796	0.0575097	-0.101976	0.537236	-0.119945	-0.314877	0.404808	0.0715703	-0.387401	0.635487	0.541389	-0.515488	-0.312229	0.209114	0.335041	0.0601428	0.119737	0.312978	0.421798	0.180705	0.221339
	z.95	-0.652028	-0.70602	-0.583431	0.553594	-0.345176	-0.752058	-0.702039	0.24347	-0.744056	-0.346322	-0.220408	-0.615408	-0.85348	-0.70138	-0.89137	-0.828573	-0.824496	-0.776932	-0.696764	-0.736093	-0.852005	-0.780502	-0.80209	-0.785149	-0.785676	-0.785271	-0.820802	-0.739283	-0.714164	-0.802909	0.578259	-0.197276	-0.533521	-0.0901663	0.55283	-0.516545	0.847018	0.849699	-0.747649	-0.226724	-0.384156	0.707918	0.254858	0.685882	-0.305813	0.686088	0.74754	0.716751
	z.96	0.164824	0.427715	0.317826	-0.794897	0.0879894	0.671148	0.78725	-0.717458	0.823147	0.577559	0.757354	0.90106	0.840313	0.660776	0.80347	0.817201	0.919459	0.811789	0.861431	0.670279	0.624096	0.662458	0.663212	0.679319	0.816984	0.668433	0.719564	0.708206	0.691414	0.664906	-0.740646	0.782771	0.0677845	0.280879	-0.689747	0.837319	-0.736601	-0.755588	0.415778	-0.443811	0.246424	-0.652725	-0.660841	-0.637821	0.523259	-0.219552	-0.788615	-0.514011
	z.97	0.0863783	-0.0738939	-0.145301	0.710183	0.109388	-0.320878	-0.507973	0.880563	-0.627758	-0.506469	-0.688393	-0.891117	-0.547573	-0.236109	-0.493893	-0.436687	-0.586974	-0.427339	-0.437201	-0.213712	-0.192314	-0.207229	-0.210959	-0.212123	-0.534716	-0.197816	-0.269723	-0.258119	-0.241905	-0.220867	0.541392	-0.762207	0.218393	-0.19846	0.731811	-0.783145	0.540547	0.599483	-0.14598	0.553149	0.0299731	0.742413	0.89684	0.397132	-0.192156	0.205702	0.637614	0.4888
	z.98	-0.620076	-0.523778	-0.605651	0.282357	-0.52611	-0.414426	-0.285511	-0.0419983	-0.516052	0.259212	0.326717	-0.430125	-0.468469	0.00913737	-0.322025	-0.229998	-0.317004	-0.156542	-0.052922	-0.0601309	-0.414884	-0.154289	-0.185526	-0.119048	-0.367041	-0.125257	-0.188547	-0.0197799	0.0155826	-0.190557	0.437547	0.0298813	-0.577756	0.594788	0.253285	-0.344085	0.718798	0.658894	-0.719072	-0.456049	0.0253332	0.281471	-0.0719805	0.323688	0.429667	0.682532	0.349647	0.492865
	z.99	0.605407	0.367592	0.43782	0.413476	0.548365	0.0607909	-0.246904	0.717223	-0.142698	-0.73941	-0.844273	-0.399529	-0.0784064	-0.141341	-0.0790219	-0.100871	-0.217328	-0.196903	-0.400525	-0.121461	0.120706	-0.109531	-0.0453597	-0.147173	-0.114967	-0.103188	-0.128719	-0.213393	-0.214853	-0.0242421	0.21295	-0.710321	0.689424	-0.44627	0.38824	-0.469433	-0.129882	-0.0296997	0.46185	0.736806	-0.0206793	0.386823	0.710738	0.10883	-0.408811	-0.480344	0.14476	-0.0878163
	z.100	0.675454	0.634969	0.661484	-0.376174	0.510813	0.634769	0.682013	-0.0765259	0.73634	0.25773	-0.0422956	0.605175	0.690174	0.230494	0.559945	0.495306	0.61969	0.433504	0.463106	0.394324	0.69824	0.569386	0.507552	0.525291	0.570768	0.501994	0.574004	0.420111	0.372692	0.490685	-0.669889	0.209073	0.499727	-0.514299	-0.481756	0.506232	-0.815562	-0.758002	0.740118	0.193037	0.0107682	-0.46646	-0.018027	-0.502266	-0.302646	-0.63602	-0.499703	-0.580337
	z.101	0.0149304	-0.176241	-0.129684	0.81381	0.123155	-0.44507	-0.621479	0.85957	-0.721419	-0.650004	-0.760963	-0.92207	-0.668305	-0.400965	-0.623096	-0.579237	-0.727253	-0.584006	-0.639079	-0.402498	-0.370601	-0.410932	-0.405101	-0.432533	-0.640098	-0.40867	-0.478538	-0.457482	-0.439187	-0.400523	0.588251	-0.799871	0.173649	-0.210085	0.833023	-0.870098	0.597339	0.667217	-0.219295	0.544379	-0.156968	0.758565	0.845288	0.510772	-0.302355	0.236903	0.710457	0.535633
	z.102	0.892394	0.846776	0.656609	0.0417082	0.781322	0.643484	0.22325	0.683478	0.391035	-0.256238	-0.598192	-0.083891	0.449684	0.420468	0.411954	0.422839	0.313105	0.3979	0.235305	0.504419	0.68996	0.506262	0.575769	0.490598	0.434065	0.525812	0.498338	0.412857	0.415785	0.574178	-0.077513	-0.454119	0.952348	-0.512304	-0.153303	-0.113404	-0.493995	-0.453871	0.83284	0.66584	0.415765	0.138957	0.667751	-0.505954	-0.172403	-0.716846	-0.358282	-0.536134
	z.103	-0.636608	-0.808601	-0.675152	0.548282	-0.582216	-0.804455	-0.58807	0.0960253	-0.771645	0.0406832	-0.0836995	-0.583611	-0.837221	-0.633127	-0.748565	-0.73547	-0.747597	-0.721915	-0.612477	-0.636097	-0.790094	-0.61752	-0.698339	-0.618329	-0.80068	-0.64005	-0.669879	-0.578069	-0.561307	-0.711329	0.663287	-0.215172	-0.709535	0.136097	0.337515	-0.521828	0.901506	0.869574	-0.862296	-0.381202	-0.341516	0.430389	0.0702495	0.733475	-0.270235	0.55602	0.693983	0.58959
	z.104	-0.390001	-0.478402	-0.401248	0.528074	-0.190735	-0.589514	-0.495764	0.38309	-0.688231	-0.561291	-0.2337	-0.635579	-0.676475	-0.522627	-0.762483	-0.680492	-0.667605	-0.623195	-0.456566	-0.547618	-0.535101	-0.516689	-0.565554	-0.524813	-0.68103	-0.538065	-0.562693	-0.549384	-0.553696	-0.572144	0.519662	-0.235175	-0.274656	-0.147894	0.826216	-0.467002	0.654351	0.68814	-0.479241	0.283388	-0.306645	0.690031	0.501398	0.590939	-0.0316592	0.693581	0.797156	0.890057
	z.105	-0.688362	-0.631608	-0.682472	0.329643	-0.625884	-0.531859	-0.349676	-0.0519928	-0.614238	0.262215	0.304981	-0.486029	-0.562563	-0.0898695	-0.404485	-0.339195	-0.418369	-0.263998	-0.142088	-0.161337	-0.49537	-0.228074	-0.275479	-0.192615	-0.476751	-0.208369	-0.265817	-0.107562	-0.0781274	-0.284647	0.461424	-0.0241743	-0.660058	0.610932	0.33893	-0.388196	0.788109	0.725489	-0.805305	-0.386841	-0.0320949	0.229472	-0.0907858	0.411385	0.38121	0.731113	0.461712	0.573951
	z.106	-0.731959	-0.903636	-0.66557	0.231652	-0.795182	-0.824756	-0.383059	-0.407292	-0.648393	0.0309192	0.281552	-0.20245	-0.642552	-0.595307	-0.535831	-0.556373	-0.493441	-0.615017	-0.464384	-0.647366	-0.738618	-0.587204	-0.685048	-0.58312	-0.684965	-0.617366	-0.599203	-0.548345	-0.560361	-0.685791	0.320125	0.108938	-0.874263	0.443336	0.39586	-0.172416	0.630825	0.647834	-0.842194	-0.483223	-0.46825	0.10934	-0.342276	0.817678	0.000792244	0.609635	0.607951	0.682985
	z.107	-0.637568	-0.750775	-0.51027	0.151414	-0.644388	-0.70071	-0.415711	-0.385351	-0.483277	0.0428636	0.103088	-0.0893954	-0.531316	-0.589324	-0.410226	-0.478144	-0.437048	-0.570387	-0.559722	-0.635609	-0.68998	-0.612731	-0.656456	-0.610988	-0.5573	-0.62532	-0.604793	-0.56936	-0.569802	-0.649565	-0.0165326	0.0098346	-0.694218	0.363238	0.292331	-0.138693	0.415527	0.475268	-0.670668	-0.520215	-0.445782	0.0107321	-0.39599	0.698927	-0.266916	0.372374	0.453564	0.397318
	z.108	0.317361	0.541873	0.31966	-0.536713	0.489268	0.491656	0.0583498	0.0956466	0.570488	-0.35431	-0.210942	0.386537	0.456483	0.136123	0.205025	0.195941	0.277902	0.260759	0.162634	0.128512	0.328631	0.0527378	0.20017	0.0830652	0.448967	0.106612	0.138644	0.0166767	0.019999	0.19456	-0.459224	0.13635	0.556297	-0.64981	-0.302812	0.502589	-0.602053	-0.598473	0.646877	0.359399	0.372079	0.0537828	0.142536	-0.541899	-0.220598	-0.376711	-0.389318	-0.401892
	z.109	0.622274	0.821187	0.705198	-0.61118	0.631349	0.902031	0.749366	-0.187305	0.968415	0.321024	0.174426	0.764328	0.905377	0.572002	0.751928	0.739645	0.82596	0.752738	0.705135	0.66279	0.804309	0.686431	0.716708	0.66941	0.884431	0.674107	0.720952	0.635663	0.618778	0.713967	-0.737109	0.42195	0.596767	-0.367364	-0.725973	0.671692	-0.923922	-0.926733	0.836158	0.0398013	0.264813	-0.507973	-0.186451	-0.860676	0.0116655	-0.61741	-0.83366	-0.796269
	z.110	0.529059	0.515316	0.275385	0.244935	0.52143	0.329762	-0.0258079	0.788448	0.047292	-0.286635	-0.562762	-0.387925	0.0902891	0.219938	0.0592296	0.145284	0.0350952	0.144724	0.097228	0.307926	0.385494	0.296928	0.332987	0.296805	0.0938294	0.322562	0.270243	0.236687	0.252051	0.318046	0.111939	-0.461183	0.635462	-0.435129	0.140433	-0.307203	-0.0586226	0.00499493	0.429945	0.416376	0.358578	0.587317	0.846192	-0.166155	-0.14352	-0.24514	0.0221907	-0.0792353
	z.111	-0.478794	-0.775921	-0.596501	0.699827	-0.535562	-0.916941	-0.783683	0.305457	-0.951794	-0.338217	-0.422098	-0.777959	-0.929749	-0.730664	-0.766574	-0.791275	-0.87285	-0.867169	-0.867307	-0.762701	-0.804921	-0.736945	-0.782004	-0.739499	-0.941168	-0.742474	-0.779395	-0.732967	-0.72095	-0.782135	0.635284	-0.583568	-0.499968	0.17099	0.699223	-0.743034	0.852809	0.9082	-0.747903	-0.0519143	-0.361201	0.550796	0.29539	0.951268	-0.374657	0.410376	0.864766	0.677335
	z.112	0.34238	0.45874	0.236588	-0.75662	0.121881	0.493801	0.286287	-0.283966	0.673264	0.187011	0.048555	0.634313	0.638994	0.294502	0.58686	0.484921	0.559272	0.442471	0.345463	0.318215	0.506721	0.325932	0.415242	0.373754	0.552815	0.37156	0.429502	0.292075	0.278764	0.396399	-0.723665	0.195111	0.348169	-0.223643	-0.59254	0.680254	-0.760469	-0.742102	0.595907	0.0616417	0.46911	-0.43922	-0.255971	-0.48844	-0.15337	-0.622467	-0.5601	-0.642193
	z.113	-0.274687	-0.388729	-0.274275	0.551914	-0.094497	-0.531208	-0.423264	0.428801	-0.638587	-0.599366	-0.311319	-0.607696	-0.613663	-0.520825	-0.700329	-0.628999	-0.613803	-0.60338	-0.447127	-0.521156	-0.445246	-0.455554	-0.517746	-0.47735	-0.64426	-0.490525	-0.507757	-0.52024	-0.533411	-0.522715	0.372579	-0.28426	-0.166611	-0.195666	0.899965	-0.474284	0.538483	0.615221	-0.368107	0.365417	-0.36671	0.662279	0.560737	0.589749	-0.0995095	0.622688	0.795913	0.869971
	z.114	0.539947	0.804269	0.590586	-0.607689	0.487841	0.932644	0.740392	-0.26012	0.865099	0.405845	0.414068	0.651212	0.92632	0.931476	0.91279	0.940453	0.908987	0.980312	0.878779	0.92196	0.847424	0.831978	0.907345	0.845213	0.975041	0.869056	0.870613	0.883476	0.890363	0.920759	-0.468331	0.415456	0.544848	0.154391	-0.735043	0.555621	-0.775452	-0.843767	0.716839	-0.0129578	0.502031	-0.579999	-0.316863	-0.944181	0.562542	-0.525403	-0.957633	-0.798509
	z.115	0.398894	0.313214	0.28272	0.440893	0.521957	0.0934924	-0.143474	0.761499	-0.129698	-0.541371	-0.649581	-0.437765	-0.123869	-0.115503	-0.194943	-0.0996227	-0.166994	-0.150028	-0.183935	-0.0251065	0.112845	-0.00449414	0.000450218	-0.0402618	-0.13668	-0.0112261	-0.0498579	-0.0880925	-0.0821818	0.00134479	0.103558	-0.454069	0.510422	-0.502658	0.435923	-0.421405	0.0422104	0.175626	0.284612	0.332501	-0.0348403	0.75801	0.860708	0.147092	-0.333338	-0.0669385	0.260241	0.180099
	z.116	0.621249	0.555529	0.69474	0.446409	0.829556	0.413534	0.330485	0.59801	0.185872	-0.265496	-0.421926	-0.150446	0.172612	0.108547	0.0515879	0.147989	0.116317	0.131094	0.120572	0.240592	0.367496	0.308873	0.250278	0.215645	0.191705	0.238364	0.215788	0.203571	0.193907	0.266991	0.0159014	-0.195838	0.622992	-0.510476	0.174993	-0.305839	-0.202835	-0.120086	0.479071	0.32824	-0.270659	0.312795	0.619638	-0.210924	-0.201229	-0.193418	-0.0721358	-0.0961332
	z.117	0.536838	0.734571	0.722061	-0.00169543	0.791256	0.745466	0.533857	0.187304	0.524317	-0.000571356	0.062954	0.20868	0.552435	0.65264	0.479021	0.582915	0.504388	0.642519	0.53118	0.659013	0.57179	0.559994	0.605438	0.511353	0.667224	0.556938	0.520043	0.587995	0.604733	0.641735	-0.121371	0.152024	0.637906	-0.0536196	-0.243398	0.0310745	-0.436316	-0.463138	0.581354	0.154165	0.08418	-0.126341	0.104934	-0.706859	0.383723	-0.258139	-0.605973	-0.464008
	z.118	-0.225821	0.0756236	-0.162277	-0.248755	-0.172499	0.278502	0.264369	-0.281166	0.172878	0.540716	0.62496	0.123702	0.248994	0.652159	0.353854	0.440803	0.360399	0.549394	0.582507	0.576319	0.218117	0.432339	0.461507	0.480328	0.367708	0.486005	0.438961	0.587384	0.621067	0.462727	-0.0159729	0.362645	-0.166435	0.636094	-0.296521	0.155387	0.0667483	-0.0412959	-0.145668	-0.391726	0.39069	-0.225362	-0.348663	-0.402802	0.781241	0.267403	-0.360465	-0.11426
	z.119	0.586424	0.329417	0.333411	0.60854	0.43927	0.119844	0.0346804	0.818687	-0.151748	-0.0396074	-0.669621	-0.524896	-0.1067	-0.00821533	-0.0471065	-0.0332842	-0.146386	-0.0841454	-0.099913	0.154891	0.279057	0.280956	0.19785	0.227514	-0.13616	0.227913	0.186395	0.155451	0.14967	0.180631	0.282843	-0.654593	0.475569	-0.403703	0.183766	-0.58664	0.108886	0.168909	0.252806	0.434161	-0.0138428	0.325101	0.793371	0.0492166	-0.411334	-0.328954	0.195125	-0.0809799
	z.120	0.162677	0.0892998	0.185894	0.331651	0.306563	-0.0112272	0.0460384	0.36067	-0.163007	-0.416618	-0.160583	-0.274345	-0.124309	-0.091679	-0.287039	-0.232628	-0.204427	-0.137714	-0.00718378	-0.0795011	0.0316739	-0.00642142	-0.0602082	-0.0493937	-0.131966	-0.0620037	-0.0651899	-0.0964062	-0.121385	-0.0579719	0.376691	-0.0989646	0.197772	-0.335104	0.428122	-0.216251	0.12224	0.0912144	0.0938603	0.66453	-0.2166	0.17142	0.416071	-0.0272318	0.128356	0.224361	0.269019	0.370487
	z.121	-0.0365311	-0.364901	-0.146817	0.231347	-0.276084	-0.407797	-0.276945	-0.101703	-0.31133	-0.00915274	-0.172578	-0.121844	-0.321626	-0.382074	-0.177437	-0.262304	-0.29065	-0.380679	-0.47703	-0.391148	-0.371878	-0.359931	-0.382509	-0.378031	-0.347448	-0.374377	-0.367646	-0.358509	-0.358422	-0.369426	0.49428	-0.236494	-0.266426	0.0938404	-0.157858	-0.240948	0.263109	0.238597	-0.270384	-0.226987	-0.223411	-0.0511382	-0.170234	0.437711	-0.342789	-0.276096	0.117165	-0.102561
	z.122	-0.400875	-0.121267	-0.32671	-0.479684	-0.379814	0.0525938	0.135677	-0.47566	0.129653	0.189973	0.609496	0.293194	0.191386	0.293376	0.212936	0.289006	0.332816	0.300898	0.415752	0.223329	0.0661506	0.149888	0.174932	0.214629	0.182238	0.205854	0.212702	0.249982	0.255548	0.1671	-0.435412	0.504245	-0.307869	0.494875	0.0331328	0.430882	-0.0792729	-0.0428023	-0.164595	-0.462808	0.252225	0.0282377	-0.331589	-0.0147137	0.586702	0.439907	-0.0836358	0.25728
	z.123	-0.391662	-0.210454	-0.115122	-0.203857	-0.112705	-0.169494	-0.295148	-0.375135	-0.0536041	-0.411857	0.175173	0.173989	-0.0807925	-0.102094	-0.108445	-0.110236	-0.111337	-0.0993596	-0.257366	-0.288768	-0.384943	-0.475741	-0.336989	-0.45391	-0.00316113	-0.410917	-0.410093	-0.358545	-0.333762	-0.29125	-0.108213	0.206163	-0.147115	0.290295	0.15777	0.133408	-0.0223929	-0.0232377	-0.144997	-0.146207	-0.1178	-0.0243817	-0.421801	0.0687363	0.199541	0.208997	-0.059555	0.0895056
	z.124	0.275835	0.373932	0.215912	-0.629879	0.044406	0.538998	0.673697	-0.4054	0.711094	0.692562	0.406266	0.694693	0.665906	0.373851	0.617178	0.591166	0.726469	0.556952	0.683041	0.513573	0.6093	0.635615	0.567231	0.648035	0.569243	0.607783	0.670307	0.585262	0.555368	0.530073	-0.694912	0.508269	0.0655682	-0.12743	-0.710225	0.706107	-0.612453	-0.598216	0.392127	-0.376855	0.260278	-0.452809	-0.310038	-0.450066	-0.00643684	-0.351261	-0.534762	-0.490298
	z.125	0.769428	0.856668	0.814734	-0.478201	0.718028	0.843247	0.709749	-0.0493347	0.855991	0.0128008	-0.00152626	0.653098	0.85993	0.493562	0.710185	0.695519	0.766133	0.656852	0.597041	0.578975	0.82561	0.641241	0.66485	0.608681	0.791903	0.618529	0.668658	0.543327	0.51192	0.671235	-0.682911	0.254724	0.738774	-0.409544	-0.44053	0.547749	-0.961283	-0.908659	0.93513	0.317001	0.166761	-0.400935	0.00562629	-0.708867	0.00674463	-0.656875	-0.693177	-0.647266
	z.126	0.578888	0.568934	0.252191	-0.195987	0.436884	0.390894	-0.0142541	0.563014	0.289743	-0.329073	-0.54613	-0.0589854	0.289183	0.137031	0.163355	0.155826	0.149473	0.161826	0.118279	0.215622	0.475321	0.245707	0.323485	0.278112	0.211949	0.285145	0.289009	0.13684	0.130624	0.290986	-0.147531	-0.336318	0.67779	-0.689896	-0.0986376	0.121417	-0.382899	-0.342064	0.643891	0.626053	0.5315	0.314263	0.661014	-0.308375	-0.313082	-0.495674	-0.10817	-0.263466
	z.127	-0.350289	-0.496465	-0.297924	0.0742869	-0.383138	-0.459271	-0.236589	-0.24704	-0.244565	0.162187	0.0127998	-0.00404131	-0.355358	-0.521622	-0.380274	-0.508224	-0.409687	-0.471184	-0.41393	-0.522385	-0.459254	-0.433252	-0.491392	-0.444046	-0.380091	-0.482953	-0.439953	-0.468593	-0.486402	-0.504547	0.185416	0.00105096	-0.464932	-0.109267	-0.0627974	-0.00589317	0.262607	0.179964	-0.393351	0.00230561	-0.33014	-0.345937	-0.342175	0.246327	-0.395719	0.0830447	0.263623	0.0849361
	z.128	-0.678771	-0.484262	-0.345514	-0.00250291	-0.34705	-0.3613	-0.087331	-0.368706	-0.222652	-0.0192909	0.402786	0.0521427	-0.278182	-0.296193	-0.372969	-0.333149	-0.217146	-0.265427	-0.0889996	-0.347153	-0.42815	-0.338831	-0.393113	-0.342272	-0.263639	-0.368006	-0.345011	-0.302836	-0.312833	-0.390806	-0.306388	0.400173	-0.540187	0.228132	0.492752	0.107523	0.244622	0.286114	-0.493507	-0.261413	-0.427781	0.0301545	-0.301551	0.280638	0.174515	0.806657	0.386045	0.638474
	z.129	0.284094	0.350948	0.439193	-0.365756	0.234416	0.551636	0.892379	-0.463824	0.674077	0.672105	0.573084	0.699151	0.630895	0.368845	0.525561	0.543593	0.700852	0.550918	0.740614	0.507758	0.557526	0.659956	0.519421	0.609483	0.580271	0.566909	0.628491	0.600446	0.558425	0.507132	-0.472806	0.676251	0.0122972	-0.0786942	-0.594368	0.578108	-0.528354	-0.552442	0.320223	-0.335018	-0.152532	-0.588233	-0.405757	-0.490626	0.185659	-0.158274	-0.532647	-0.36466
	z.130	0.371888	0.657353	0.510883	-0.735313	0.403704	0.840749	0.846048	-0.448245	0.922628	0.392666	0.576984	0.843208	0.909479	0.679014	0.746643	0.790969	0.913448	0.841862	0.920026	0.724359	0.763815	0.734148	0.738979	0.735196	0.890863	0.725596	0.775406	0.728207	0.706189	0.735535	-0.688913	0.731392	0.334955	-0.087227	-0.648952	0.821774	-0.820086	-0.849009	0.640359	-0.125673	0.271314	-0.513885	-0.368957	-0.818201	0.44324	-0.265458	-0.794522	-0.523046
	z.131	0.12542	0.247629	0.463249	-0.438632	0.285352	0.44312	0.759978	-0.605611	0.692713	0.387792	0.53896	0.840016	0.562666	0.101092	0.344196	0.345788	0.575997	0.357741	0.512362	0.199762	0.322549	0.324557	0.222123	0.261579	0.518028	0.228868	0.316686	0.263081	0.218342	0.22591	-0.635759	0.804282	-0.0369604	-0.247178	-0.480273	0.697272	-0.603417	-0.599917	0.30452	-0.341986	-0.392224	-0.560714	-0.539619	-0.41699	-0.00113406	-0.063891	-0.476106	-0.282394
	z.132	0.60933	0.620575	0.576568	-0.498006	0.360218	0.6582	0.699875	-0.213138	0.75024	0.375764	0.105159	0.654974	0.763871	0.405925	0.726318	0.656754	0.738495	0.573597	0.568171	0.529694	0.754919	0.663233	0.625918	0.644595	0.649446	0.626651	0.6893	0.561312	0.521929	0.611849	-0.776416	0.237717	0.446468	-0.208978	-0.508978	0.556398	-0.847811	-0.78522	0.703281	0.0751226	0.160175	-0.567906	-0.164849	-0.519055	-0.0897129	-0.62997	-0.584692	-0.620267
	z.133	-0.698919	-0.733925	-0.677469	0.564735	-0.489133	-0.776616	-0.723173	0.218688	-0.869674	-0.347047	-0.0937933	-0.735041	-0.856443	-0.477668	-0.790243	-0.722952	-0.798492	-0.657944	-0.597287	-0.585442	-0.798153	-0.674596	-0.674466	-0.655046	-0.773061	-0.650223	-0.709931	-0.589648	-0.558693	-0.668398	0.699177	-0.274922	-0.550425	0.288151	0.701011	-0.612782	0.926866	0.902408	-0.814406	-0.0776842	-0.225539	0.605744	0.206824	0.67295	0.0918225	0.77529	0.757968	0.808454
	z.134	-0.0309098	0.29516	-0.0411109	-0.388612	0.261801	0.28858	-0.158073	0.179613	0.278527	-0.338826	-0.0751586	0.0873865	0.180782	0.149166	-0.0413522	0.0348975	0.0706513	0.171535	0.146818	0.0961673	0.0987015	-0.0586635	0.0940862	0.000549871	0.241543	0.0254556	0.0142339	-0.0168481	0.0115529	0.0827102	-0.161052	0.152902	0.298026	-0.429742	-0.111717	0.313369	-0.172654	-0.205749	0.279627	0.174497	0.466588	0.388852	0.242378	-0.393218	0.0464418	0.0701245	-0.16113	-0.0566289
	z.135	0.257346	0.470436	0.486438	-0.737479	0.383148	0.587295	0.540963	-0.527975	0.815155	-0.00334682	0.354791	0.888027	0.722336	0.256439	0.492413	0.473853	0.648044	0.484128	0.467935	0.253894	0.422611	0.247508	0.304659	0.238801	0.684818	0.242874	0.321172	0.223304	0.197898	0.318383	-0.70368	0.660805	0.28779	-0.298256	-0.525835	0.835919	-0.838526	-0.835949	0.602104	-0.0511048	0.0288696	-0.463129	-0.459141	-0.588806	0.0722474	-0.332729	-0.657252	-0.479397
	z.136	0.579652	0.503698	0.621775	-0.123341	0.412898	0.564908	0.861792	-0.117419	0.568082	0.469594	0.213457	0.470522	0.596469	0.343017	0.538306	0.536467	0.633123	0.483253	0.628287	0.522637	0.692492	0.736638	0.579289	0.666147	0.498508	0.628789	0.680064	0.606171	0.553342	0.566979	-0.458093	0.304254	0.293848	-0.189741	-0.326712	0.317838	-0.574909	-0.530343	0.500722	0.0336656	-0.175907	-0.481422	-0.0484447	-0.394039	0.0360475	-0.336648	-0.392271	-0.335439
	z.137	0.347218	0.323457	0.218826	0.373984	0.543311	0.107876	-0.20126	0.833345	-0.0898214	-0.504904	-0.691976	-0.456965	-0.14838	-0.171075	-0.322284	-0.259685	-0.284145	-0.201048	-0.191824	-0.0788913	0.0948358	-0.048989	-0.0325545	-0.072525	-0.145671	-0.0602145	-0.0894569	-0.156701	-0.152953	-0.0495233	0.151104	-0.453395	0.522358	-0.758452	0.356457	-0.346815	0.0678346	0.122554	0.299996	0.604893	0.0531923	0.641896	0.88508	-0.045506	-0.431065	-0.0373274	0.287199	0.149146
	z.138	-0.167034	-0.468741	-0.326956	0.240018	-0.493141	-0.462285	-0.273895	-0.154154	-0.408256	0.252126	-0.0135475	-0.215706	-0.36847	-0.243097	-0.139717	-0.238004	-0.306916	-0.313211	-0.374833	-0.273083	-0.363055	-0.24795	-0.287604	-0.244152	-0.374651	-0.254265	-0.263303	-0.213633	-0.208298	-0.28507	0.585464	-0.258381	-0.419402	0.361121	-0.177855	-0.29859	0.41493	0.334932	-0.439464	-0.229296	-0.093265	-0.221516	-0.274921	0.398827	-0.126863	-0.164333	0.142943	-0.0693005
	z.139	-0.239541	-0.150957	-0.191158	0.413732	0.124919	-0.268402	-0.387999	0.534829	-0.402311	-0.536072	-0.342712	-0.527747	-0.45038	-0.342565	-0.596769	-0.477378	-0.475354	-0.405438	-0.300253	-0.328619	-0.315363	-0.348582	-0.350499	-0.355768	-0.419256	-0.349323	-0.385069	-0.374246	-0.362636	-0.35854	0.133896	-0.20684	0.0165421	-0.340483	0.724841	-0.371283	0.411371	0.494825	-0.20993	0.216267	-0.165443	0.812983	0.646209	0.316825	-0.147553	0.594571	0.595671	0.675617
	z.140	-0.0501716	0.114903	0.140074	-0.686138	-0.0835343	0.372495	0.715586	-0.775768	0.656378	0.59148	0.756814	0.868376	0.583345	0.223398	0.43604	0.422887	0.65199	0.445499	0.661091	0.293061	0.356987	0.410325	0.318143	0.40481	0.50554	0.353241	0.443379	0.383283	0.339478	0.299219	-0.667487	0.876364	-0.236799	-0.00338213	-0.564413	0.862913	-0.544559	-0.569186	0.171554	-0.435843	-0.0780838	-0.625755	-0.663414	-0.38713	0.223892	0.0202353	-0.458418	-0.214147
	z.141	-0.606105	-0.518588	-0.24075	0.000897421	-0.411283	-0.28285	0.250786	-0.677819	-0.121914	0.350803	0.765602	0.255356	-0.142429	-0.125701	-0.166119	-0.119397	0.00773994	-0.0757401	0.151556	-0.159661	-0.334408	-0.110974	-0.242926	-0.144484	-0.118879	-0.182274	-0.150962	-0.0530607	-0.0736746	-0.229483	-0.0493795	0.657731	-0.722195	0.491301	0.129862	0.180605	0.247598	0.214609	-0.566818	-0.567735	-0.56405	-0.306453	-0.642963	0.212339	0.430097	0.703866	0.135532	0.458768
	z.142	0.172738	0.106304	-0.24559	-0.236871	-0.251305	0.0867303	-0.193771	0.0917894	0.0103865	0.215968	-0.091395	-0.111009	0.104314	0.340132	0.317599	0.279383	0.135093	0.235618	0.0874712	0.29781	0.187957	0.194701	0.298781	0.279653	0.107743	0.297996	0.258402	0.270859	0.304435	0.280684	0.320515	-0.297214	0.102605	0.244859	-0.493571	-0.00628707	0.0369152	-0.0388757	0.0789505	-0.0913551	0.747649	0.0260346	0.0428563	-0.0972428	0.11888	-0.487894	-0.265137	-0.431812
	z.143	-0.00912075	-0.0422199	-0.192279	-0.343607	-0.30951	-0.00717691	0.166108	-0.215531	0.0556021	0.0400545	0.258249	0.170156	0.166066	0.0931691	0.169486	0.169899	0.247124	0.123662	0.298147	0.110763	0.221465	0.213286	0.168261	0.256973	0.027135	0.2189	0.258082	0.166292	0.131193	0.138533	-0.21582	0.190623	-0.115571	0.112841	0.0849597	0.345665	-0.157839	-0.10925	0.0500909	0.0610316	0.224006	-0.0149602	-0.0066913	0.117034	0.277796	0.0913598	0.0855617	0.251597
	z.144	0.413292	0.712276	0.481771	-0.597857	0.416075	0.820452	0.636331	-0.244797	0.746587	0.179255	0.416816	0.582917	0.835122	0.849319	0.808508	0.883311	0.86061	0.892091	0.826114	0.821208	0.755487	0.71848	0.801592	0.741713	0.861386	0.770491	0.769554	0.777192	0.783522	0.817438	-0.561137	0.440896	0.491718	0.210198	-0.440053	0.543595	-0.718448	-0.712921	0.641843	-0.0730544	0.465323	-0.289316	-0.19914	-0.734486	0.636335	-0.297522	-0.773806	-0.505007
	z.145	-0.263046	-0.453179	-0.435104	0.76377	-0.190847	-0.656311	-0.697872	0.720426	-0.83288	-0.427117	-0.622369	-0.928784	-0.826876	-0.579819	-0.78726	-0.759928	-0.846304	-0.740697	-0.681976	-0.555409	-0.544464	-0.515601	-0.557554	-0.51964	-0.822782	-0.526014	-0.580135	-0.563283	-0.550823	-0.57674	0.580336	-0.69045	-0.15982	-0.199795	0.802418	-0.792361	0.784409	0.835461	-0.493804	0.341787	-0.184124	0.751658	0.734869	0.666357	-0.391448	0.446551	0.886305	0.702599
	z.146	-0.305893	-0.125692	0.0337231	-0.160789	0.140061	-0.114496	-0.250411	-0.236733	0.0568915	-0.541889	0.0131192	0.228362	-0.0861708	-0.327646	-0.291729	-0.281787	-0.186055	-0.232991	-0.322025	-0.441518	-0.401042	-0.56547	-0.456994	-0.575428	-0.0245443	-0.54332	-0.517363	-0.521338	-0.51047	-0.420567	-0.169735	0.276367	-0.0465104	-0.220609	0.149069	0.207256	-0.0959927	-0.0851043	-0.0213362	-0.0326884	-0.30414	0.110069	-0.242155	0.0125144	-0.136776	0.214088	0.00366729	0.116083
	z.147	-0.252452	-0.527563	-0.360297	0.709365	-0.198579	-0.757605	-0.814534	0.553946	-0.824344	-0.586557	-0.710635	-0.795481	-0.850489	-0.763028	-0.80897	-0.86131	-0.931815	-0.881171	-0.93956	-0.788378	-0.70313	-0.764784	-0.764814	-0.779744	-0.852827	-0.773806	-0.804772	-0.814951	-0.805955	-0.764077	0.602256	-0.730299	-0.163123	-0.23124	0.714737	-0.746561	0.679135	0.715892	-0.457493	0.407202	-0.330906	0.530024	0.500409	0.715836	-0.582474	0.222009	0.812543	0.531527
	z.148	0.267285	0.257255	0.258409	-0.470224	0.0312578	0.395519	0.71761	-0.413736	0.57562	0.578591	0.407688	0.637083	0.554115	0.201702	0.459511	0.4111	0.593006	0.389269	0.601084	0.349724	0.534779	0.562555	0.428708	0.54407	0.417809	0.482733	0.566216	0.450965	0.394089	0.393197	-0.582415	0.499926	-0.00624797	-0.187354	-0.469011	0.634045	-0.551429	-0.542209	0.328774	-0.104023	-0.0144997	-0.570767	-0.298911	-0.331574	-0.000103296	-0.225209	-0.337184	-0.264409
	z.149	0.622713	0.848589	0.702935	-0.658315	0.658278	0.919768	0.741603	-0.180912	0.96415	0.154164	0.209816	0.763406	0.928204	0.60821	0.737219	0.753059	0.846422	0.779317	0.751651	0.671001	0.823178	0.675933	0.724656	0.666532	0.902483	0.675079	0.721563	0.628207	0.609226	0.725478	-0.693339	0.471219	0.639443	-0.37398	-0.632978	0.716866	-0.942646	-0.943869	0.878148	0.138898	0.308426	-0.413718	-0.130514	-0.867203	0.154788	-0.544676	-0.816266	-0.690557
	z.150	0.346236	0.463155	0.230889	-0.353478	0.166185	0.516059	0.223037	-0.104326	0.390172	0.259998	0.189204	0.216933	0.494673	0.736706	0.622538	0.594879	0.450309	0.645409	0.434231	0.633374	0.463675	0.468161	0.599875	0.513439	0.585712	0.549973	0.513245	0.572274	0.603909	0.617724	0.141828	-0.00354096	0.365801	0.354884	-0.630301	0.163654	-0.318786	-0.468832	0.381146	0.139691	0.619279	-0.49628	-0.276897	-0.663372	0.517834	-0.542556	-0.707287	-0.718327
	z.151	0.464014	0.45839	0.300133	0.309035	0.572843	0.250919	-0.114479	0.788331	-0.0118686	-0.486165	-0.619256	-0.402667	0.00786302	0.087398	-0.0581479	0.0412382	-0.0572567	0.0273992	-0.0441108	0.155283	0.250339	0.12408	0.174335	0.111203	0.0211635	0.14807	0.0974634	0.0673208	0.0844131	0.172386	0.0926559	-0.452057	0.627884	-0.476797	0.289066	-0.349473	-0.0373608	0.0583004	0.397654	0.397639	0.204169	0.704353	0.858771	-0.062267	-0.207942	-0.160138	0.0996779	0.0246334
	z.152	0.144881	0.265988	0.293793	-0.739448	0.129735	0.439632	0.554779	-0.666847	0.735741	0.244526	0.485944	0.904285	0.63112	0.157079	0.453554	0.430135	0.635006	0.40634	0.469278	0.194704	0.333302	0.240983	0.239483	0.236915	0.562708	0.220097	0.308155	0.218594	0.187536	0.238632	-0.578263	0.743774	0.0164794	-0.220787	-0.682292	0.86746	-0.688456	-0.698285	0.396561	-0.362244	0.000987797	-0.458156	-0.563138	-0.407516	0.0179482	-0.300497	-0.59586	-0.43743
	z.153	-0.411748	-0.44883	-0.432699	0.485143	-0.186886	-0.51895	-0.51365	0.415622	-0.560089	-0.156556	-0.309082	-0.599201	-0.665223	-0.536852	-0.758459	-0.749709	-0.731183	-0.616636	-0.489222	-0.516731	-0.536682	-0.484156	-0.5298	-0.486972	-0.62248	-0.512568	-0.536441	-0.515914	-0.507419	-0.556397	0.461188	-0.297132	-0.300625	-0.329826	0.442388	-0.443421	0.66756	0.615192	-0.498031	0.243522	-0.206944	0.40355	0.376707	0.334482	-0.353148	0.510611	0.660311	0.533219
	z.154	0.166524	0.242389	0.317134	-0.443952	0.0750957	0.454463	0.854041	-0.560928	0.625438	0.672968	0.63432	0.726122	0.596597	0.304882	0.497633	0.497727	0.681085	0.494927	0.722354	0.434836	0.510738	0.610337	0.461665	0.573755	0.51186	0.519658	0.594553	0.544085	0.493914	0.442184	-0.602635	0.711343	-0.0968869	-0.0115291	-0.486264	0.65052	-0.527343	-0.528163	0.2471	-0.333819	-0.155493	-0.617227	-0.464779	-0.392527	0.203422	-0.056416	-0.431578	-0.236105
	z.155	0.24154	0.00984841	-0.140761	0.419036	0.0697237	-0.287498	-0.642114	0.81715	-0.479486	-0.593146	-0.879235	-0.722344	-0.425885	-0.306433	-0.371869	-0.4181	-0.552168	-0.446688	-0.573474	-0.304115	-0.142476	-0.304772	-0.231208	-0.277285	-0.464305	-0.258508	-0.302037	-0.379607	-0.366236	-0.248511	0.464939	-0.887572	0.359968	-0.393943	0.440437	-0.575089	0.297614	0.336339	0.0752991	0.725603	0.273097	0.566042	0.808112	0.316788	-0.468243	-0.243044	0.474941	0.150229
	z.156	-0.245799	-0.569436	-0.378023	0.740224	-0.280331	-0.767681	-0.663208	0.468464	-0.881169	-0.556022	-0.504162	-0.801401	-0.824212	-0.651794	-0.755643	-0.769194	-0.837204	-0.797375	-0.764244	-0.682473	-0.629435	-0.624131	-0.673304	-0.644049	-0.8496	-0.649673	-0.680981	-0.675177	-0.679268	-0.670953	0.75606	-0.617438	-0.250943	-0.040809	0.793779	-0.742075	0.734763	0.762686	-0.515967	0.401877	-0.362343	0.515419	0.480318	0.776167	-0.267767	0.351011	0.842092	0.701069
	warmness	0.308766	0.503191	0.424343	-0.675376	0.357855	0.622533	0.575252	-0.406903	0.782357	0.0916157	0.349857	0.78662	0.718789	0.348678	0.548631	0.595358	0.734874	0.556954	0.578251	0.395091	0.50733	0.391109	0.424155	0.390351	0.671976	0.397128	0.453881	0.380462	0.363608	0.428308	-0.654938	0.633383	0.282838	-0.237939	-0.548141	0.760652	-0.748947	-0.700502	0.569783	-0.318427	0.149764	-0.158556	-0.262773	-0.477913	0.114005	-0.305728	-0.632347	-0.425285
	astringency	0.511734	0.2982	0.226195	0.584154	0.367499	0.0383107	-0.202924	0.897265	-0.2493	-0.189944	-0.820273	-0.637445	-0.187087	-0.0314812	-0.0816502	-0.0951304	-0.26088	-0.152833	-0.263927	0.0789083	0.193808	0.142177	0.12799	0.116957	-0.204759	0.133319	0.0776673	0.04341	0.0523976	0.113584	0.203199	-0.843267	0.529406	-0.327855	0.322804	-0.663176	0.131896	0.213542	0.238937	0.54259	0.123815	0.392259	0.838919	0.101104	-0.455884	-0.34424	0.264581	-0.0712148
	sourness	-0.0554498	-0.18312	-0.0925332	0.5899	0.0708081	-0.313828	-0.179892	0.57041	-0.417711	-0.147094	-0.427268	-0.544368	-0.463831	-0.457764	-0.55706	-0.532765	-0.497599	-0.489918	-0.301843	-0.326692	-0.194087	-0.159348	-0.291661	-0.204948	-0.508047	-0.242148	-0.249207	-0.290119	-0.31216	-0.323241	0.124251	-0.355907	-0.042649	-0.448302	0.626646	-0.462435	0.399039	0.469596	-0.215342	0.36879	-0.359173	0.423068	0.628771	0.350976	-0.434171	0.392922	0.675149	0.561327
	bitterness	0.248893	0.322925	0.328444	-0.0604343	0.233696	0.322587	0.126267	-0.0850774	0.164988	-0.0436388	0.111028	0.0829761	0.296114	0.548102	0.429055	0.406658	0.24292	0.430357	0.181045	0.39979	0.239507	0.232447	0.349879	0.235915	0.405328	0.286643	0.24497	0.331814	0.358399	0.39834	0.162349	-0.0895309	0.334909	0.479365	-0.183577	-0.0833047	-0.217442	-0.313014	0.261525	0.263418	0.214717	-0.46516	-0.282515	-0.441088	0.535031	-0.332512	-0.492148	-0.453877
	clarity	-0.244039	-0.48552	-0.386445	0.785713	-0.192235	-0.706101	-0.799212	0.619137	-0.891787	-0.621733	-0.624125	-0.910789	-0.84309	-0.553503	-0.723565	-0.690682	-0.837474	-0.738693	-0.811325	-0.603662	-0.64921	-0.648464	-0.633376	-0.65426	-0.810464	-0.627707	-0.695943	-0.639412	-0.612564	-0.621332	0.746547	-0.727886	-0.140931	0.0270566	0.780727	-0.867661	0.784421	0.843578	-0.501608	0.206355	-0.215014	0.78852	0.606852	0.771492	-0.281895	0.321804	0.777647	0.61572
	color tonality	-0.373857	-0.358175	-0.277305	-0.185832	-0.499585	-0.211823	0.185022	-0.559434	-0.119851	0.209062	0.621716	0.188926	-0.004881	0.0696068	0.0493655	0.0381753	0.105127	0.0531422	0.229232	-0.00303619	-0.0785478	0.0539939	-0.0216197	0.0704261	-0.0553677	0.0311585	0.0627184	0.0827956	0.0533271	-0.0218935	-0.0453394	0.390217	-0.482852	0.562322	0.175521	0.231063	0.0802627	0.0467732	-0.328132	-0.0978419	-0.138359	-0.396454	-0.488763	0.148799	0.582706	0.424858	0.107954	0.379113
	color intensity	-0.338086	-0.188849	-0.156451	-0.124303	-0.356239	-0.0381989	0.168854	-0.46953	-0.0321234	0.376687	0.541905	0.149572	0.0781942	0.309817	0.247907	0.243824	0.193026	0.242288	0.243925	0.218226	-0.00651495	0.163451	0.149357	0.181496	0.118475	0.178421	0.167231	0.268042	0.274506	0.166323	-0.269575	0.249845	-0.324464	0.797038	0.0952465	0.06911	0.0272088	0.0202669	-0.274588	-0.311905	-0.0340552	-0.432904	-0.533697	-0.0181219	0.577509	0.310551	-0.098593	0.092378
	overall-intensity	-0.192672	-0.17069	0.128465	0.0946686	-0.0275433	-0.00859603	0.241792	-0.449723	0.099801	0.446208	0.378773	0.277808	0.0189272	0.00271864	0.0836964	0.0792604	0.0956377	0.0611784	0.0191702	0.000131873	-0.183879	-0.0252184	-0.0839297	-0.081936	0.10961	-0.0752538	-0.0711947	0.0502673	0.0598951	-0.0509565	-0.0182357	0.343991	-0.326064	0.337177	-0.324421	0.00681702	0.0487151	0.003869	-0.251737	-0.647221	-0.453512	-0.408734	-0.597931	-0.0376253	0.0319049	0.0512049	-0.258581	-0.231495
	Model quality:
	Statistic	Comp1	Comp2	Comp3	Comp4
	Q² cum	0.0627622	0.133662	0.199598	0.207546
	R²Y cum	0.270055	0.467789	0.626752	0.761441
	R²X cum	0.353824	0.567391	0.666959	0.738589
	Correlation matrix of the variables with the t and u~ components:
		t1	t2	t3	t4	u~1	u~2	u~3	u~4
	y.3	0.344861	0.827375	-0.167825	-0.0628575	0.063711	0.493559	-0.031359	0.218069
	y.4	0.596536	0.756604	-0.207017	-0.084329	0.319894	0.35002	-0.0546803	0.255004
	y.6	0.4894	0.60428	-0.0745046	0.0396979	0.286779	0.209263	-0.0916999	0.283977
	y.7	-0.800617	0.11207	-0.113067	-0.0502059	-0.806296	0.319886	-0.0835417	-0.193679
	y.8	0.28616	0.771365	-0.0736499	0.131169	0.0636251	0.465712	0.0161447	0.340164
	y.10	0.806965	0.529817	-0.161312	-0.103169	0.567638	0.100888	-0.0597803	0.275331
	y.12	0.823917	0.136059	0.145306	-0.26588	0.647664	-0.239588	0.0759557	0.0725272
	y.13	-0.619644	0.743075	-0.166898	-0.0705731	-0.823378	0.847593	0.105245	-0.0755732
	y.14	0.939964	0.309374	0.0938417	0.0549162	0.77433	-0.0650343	0.0834136	0.366252
	y.15	0.531205	-0.360445	0.0358252	-0.269	0.436399	-0.408395	-0.0205777	-0.0462864
	y.16	0.632346	-0.687025	0.0603893	-0.195691	0.761319	-0.830811	-0.0967523	-0.0765231
	y.17	0.933625	-0.14296	0.258598	0.130687	0.934177	-0.435832	0.0851149	0.315743
	y.18	0.933244	0.32936	-0.0670927	-0.114815	0.755782	-0.10956	-0.0492771	0.2353
	y.19	0.705249	0.228015	-0.529797	-0.355351	0.542523	-0.189114	-0.391468	0.0254254
	y.21	0.857229	0.240593	-0.304512	-0.231842	0.696021	-0.194292	-0.272768	0.147638
	y.22	0.849668	0.255385	-0.308493	-0.264155	0.690119	-0.182879	-0.242463	0.155694
	y.23	0.944747	0.182959	-0.0553416	-0.208045	0.799218	-0.232857	-0.0475111	0.184006
	y.26	0.866847	0.229825	-0.318995	-0.2608	0.699953	-0.204657	-0.235678	0.135781
	y.27	0.861428	0.107906	-0.0433448	-0.389682	0.687757	-0.259017	0.020884	-0.00524009
	y.28	0.720494	0.333949	-0.380307	-0.388464	0.493211	-0.0661498	-0.231315	0.0356104
	y.29	0.719505	0.573037	-0.125893	-0.334729	0.429505	0.160812	0.00266976	0.0539121
	y.30	0.704856	0.366717	-0.16839	-0.465524	0.431959	-0.00941948	-0.0539168	-0.0477853
	y.31	0.729641	0.418106	-0.305679	-0.386447	0.47416	0.0129866	-0.157781	0.0271825
	y.32	0.711771	0.343194	-0.201646	-0.479175	0.447338	-0.0212937	-0.0650393	-0.0638816
	y.33	0.92499	0.295799	-0.198013	-0.0668176	0.765554	-0.151812	-0.167795	0.287273
	y.34	0.708521	0.371602	-0.260923	-0.452883	0.44896	-0.00833583	-0.114727	-0.0299492
	y.35	0.760533	0.352977	-0.177704	-0.435589	0.503273	-0.0319248	-0.0593816	-0.0208271
	y.36	0.731432	0.245834	-0.303941	-0.446509	0.507192	-0.133059	-0.184804	-0.0199614
	y.37	0.715673	0.243012	-0.354279	-0.430307	0.497942	-0.129917	-0.221503	-0.0013941
	y.38	0.734889	0.411153	-0.342589	-0.366969	0.491829	-0.0120144	-0.205297	0.0464346
	Total polyphenols	-0.694475	-0.0772979	-0.410233	0.168321	-0.582271	0.138058	-0.277984	-0.000811
	Lactic acid	0.715025	-0.471768	0.363114	0.0466213	0.814515	-0.61251	0.191674	0.162513
	Tartaric acid	0.259852	0.898801	-0.278247	-0.0110236	-0.000953674	0.566668	-0.0955553	0.213869
	Acetic acid	0.102827	-0.669751	-0.578163	-0.377533	0.27988	-0.763678	-0.664377	-0.316809
	z.1	-0.823141	-0.0317039	0.0992303	-0.27492	-0.741517	0.169667	0.0791799	-0.546185
	z.2	0.841492	-0.144004	0.352944	0.0752876	0.841758	-0.344476	0.257161	0.21253
	z.3	-0.851744	-0.422783	-0.0849946	-0.00717724	-0.685483	-0.00515859	-0.041994	-0.267423
	z.4	-0.903158	-0.357694	0.00478864	-0.0471917	-0.746212	0.0710752	0.0406046	-0.296783
	z.5	0.596183	0.770238	-0.0783037	0.0073116	0.345892	0.372666	0.0261096	0.280851
	z.6	-0.257531	0.679309	-0.167576	-0.152083	-0.452068	0.526526	-0.0487742	-0.282104
	z.7	0.286603	0.300416	-0.422036	-0.160928	0.163694	0.183605	-0.144718	0.0320463
	z.8	-0.744394	0.280897	0.132127	0.0971888	-0.7025	0.604601	0.363949	0.0212734
	z.9	-0.614961	0.764223	0.0349101	-0.135316	-0.816233	0.894547	0.322895	-0.123019
	z.10	-0.819345	-0.37557	0.2488	0.0253096	-0.612907	0.030803	0.171111	-0.257723
	z.11	0.428104	-0.335088	-0.498877	-0.450229	0.492239	-0.630067	-0.466372	-0.266987
	z.12	-0.425292	-0.620222	0.277141	-0.203192	-0.235828	-0.347811	0.197092	-0.413744
	z.13	-0.920334	-0.198587	0.312156	-0.0986337	-0.814953	0.22115	0.302338	-0.433112
	z.14	-0.718141	-0.391838	0.354339	-0.227939	-0.552009	-0.0609514	0.312533	-0.507246
	z.15	-0.632226	-0.0223434	0.334168	0.0859721	-0.560963	0.385511	0.435542	-0.130285
	z.16	0.91486	0.246276	0.187021	-0.124806	0.766039	-0.129433	0.15076	0.190108
	z.17	0.0374363	-0.419858	-0.278554	-0.0621659	0.167248	-0.280454	-0.128499	-0.00700811
	z.18	-0.168776	-0.538962	0.489581	-0.41241	-0.0408916	-0.340255	0.348995	-0.453646
	z.19	-0.60619	-0.623061	0.0330222	0.116659	-0.403433	-0.268504	-0.160064	-0.240049
	z.20	-0.577004	-0.264168	0.156929	-0.330388	-0.427136	-0.02622	0.159711	-0.411749
	z.21	-0.458589	-0.024734	0.0901369	-0.187646	-0.41547	0.180219	0.0873017	-0.250031
	z.22	0.197768	-0.235394	-0.487049	0.114866	0.293299	-0.331292	-0.397498	0.181413
	z.23	-0.528687	-0.0174812	-0.149003	0.339359	-0.390616	0.127875	-0.070915	0.213838
	z.24	0.169327	-0.349978	0.430217	-0.379192	0.128084	-0.29686	0.189542	-0.390872
	z.25	-0.515274	0.12095	0.276524	-0.17341	-0.484618	0.290683	0.222597	-0.26387
	z.26	-0.0969456	-0.292829	-0.188984	0.118423	0.00837409	-0.223538	-0.131006	-0.00847694
	z.27	-0.158279	-0.756746	-0.0315904	0.16601	0.0745664	-0.510558	-0.220471	0.0282768
	z.28	0.471716	0.55464	0.367657	0.380666	0.359644	0.390736	0.456328	0.507969
	z.29	0.390144	-0.850435	-0.192059	0.0821156	0.625974	-0.893097	-0.433031	0.106576
	z.30	0.704765	0.221543	0.40305	0.476925	0.674962	0.0144103	0.295785	0.574894
	z.31	0.40267	0.623885	-0.620244	-0.169623	0.196187	0.240079	-0.382927	0.130992
	z.32	0.0509225	-0.0798597	-0.219636	0.795105	0.20676	0.0259873	-0.200843	0.804664
	z.33	0.69305	-0.0997784	0.214315	0.412034	0.758001	-0.287575	0.0909663	0.455561
	z.34	-0.735284	0.137132	-0.608343	0.000401824	-0.688366	0.307266	-0.421662	-0.106021
	z.35	0.479224	0.183179	0.46329	0.327738	0.384579	0.0571835	0.358305	0.483333
	z.36	-0.503838	0.0819155	-0.11422	-0.216096	-0.409124	0.0571628	-0.103367	-0.487243
	z.37	-0.206914	-0.7641	0.484441	0.0697363	-0.0335476	-0.417586	0.289367	-0.131734
	z.38	-0.479496	0.585957	0.0563086	0.244133	-0.587877	0.667433	0.177051	0.261838
	z.39	0.0840339	0.47402	-0.321889	-0.18195	-0.121426	0.381688	0.0168985	0.0816135
	z.40	-0.335456	-0.789051	0.251141	0.322001	-0.00387065	-0.521041	-0.0493282	-0.0380417
	z.41	0.251117	0.0618669	-0.650241	-0.399441	0.143244	-0.099439	-0.392375	-0.092472
	z.42	-0.296015	-0.274539	0.536031	0.48881	-0.100355	-0.00903627	0.402583	0.171227
	z.43	0.424774	0.414236	0.273741	-0.339631	0.151703	0.332837	0.53355	0.0611656
	z.44	0.268473	0.785768	-0.119915	-0.191066	-0.00936709	0.596689	0.162325	0.0442937
	z.45	0.370952	-0.118893	0.851145	-0.156062	0.272393	-0.0678737	0.749768	-0.0745059
	z.46	0.482586	-0.0764502	0.629249	-0.47336	0.328469	-0.164844	0.546606	-0.289883
	z.47	-0.578572	0.61166	-0.0425048	-0.202018	-0.759595	0.726598	0.119217	-0.188208
	z.48	0.765721	0.363307	0.178418	0.22011	0.615981	0.170664	0.310004	0.523633
	z.49	0.40411	0.53256	-0.217933	0.472173	0.329241	0.281511	-0.228071	0.580379
	z.50	0.478693	0.806266	-0.0139108	-0.0526903	0.243904	0.453669	0.127355	0.283033
	z.51	0.653836	0.240511	0.0810927	0.247569	0.592485	0.00363809	0.200062	0.498438
	z.52	-0.274917	0.125426	0.482507	0.561297	-0.323713	0.433776	0.475285	0.362406
	z.53	0.662462	0.623713	-0.0371815	-0.032061	0.411771	0.313956	0.186742	0.331455
	z.54	-0.715055	-0.4754	0.475689	0.0819023	-0.506553	-0.0686202	0.310664	-0.29368
	z.55	0.457727	-0.405868	-0.48151	-0.279841	0.48265	-0.573838	-0.436571	-0.0462419
	z.56	0.558614	0.243101	-0.265691	0.201787	0.452818	-0.0537805	-0.209735	0.289625
	z.57	-0.0259632	0.342398	-0.200407	0.0711956	-0.157886	0.230048	-0.162296	-0.00239717
	z.58	-0.345462	0.215096	0.728363	-0.0917579	-0.39771	0.349525	0.589311	-0.32537
	z.59	0.593779	0.567631	-0.0866336	-0.31966	0.402985	0.195822	0.0581599	0.0752939
	z.60	0.491188	-0.27212	0.672798	-0.224591	0.420922	-0.317441	0.43317	-0.13897
	z.61	-0.481611	-0.647632	0.137084	0.0159096	-0.310569	-0.302648	-0.0198169	-0.164354
	z.62	0.765306	0.492715	0.106231	-0.0319529	0.520052	0.238805	0.255591	0.299118
	z.63	-0.896338	-0.397558	0.0422677	-0.133617	-0.726422	-0.0177972	-0.0176691	-0.462863
	z.64	0.470924	-0.0859284	-0.483217	-0.522391	0.35442	-0.308648	-0.344688	-0.151511
	z.65	-0.395623	0.660997	-0.00603515	-0.192498	-0.64944	0.796255	0.346935	0.0186038
	z.66	-0.433808	0.481668	0.242545	-0.0499731	-0.534357	0.750177	0.580789	0.0857833
	z.67	0.66749	-0.0785913	0.653291	0.0253663	0.644124	-0.227565	0.496745	0.0963425
	z.68	0.893711	0.11187	0.163313	-0.0434766	0.782682	-0.185454	0.207292	0.332847
	z.69	-0.922919	0.110988	-0.267237	-0.234127	-0.912553	0.373687	-0.127201	-0.413986
	z.70	-0.254751	-0.464532	-0.471123	-0.0719509	-0.122245	-0.290097	-0.334291	-0.0374823
	z.71	0.522191	-0.191414	-0.100648	-0.0491645	0.519822	-0.384091	-0.324645	0.0520557
	z.72	0.756601	-0.213983	0.174109	0.167285	0.847354	-0.503322	-0.0652075	0.164453
	z.73	0.590488	0.313379	0.178374	-0.147677	0.436074	-0.0684639	0.0566014	0.0883908
	z.74	0.572029	-0.457204	0.581826	0.205128	0.688334	-0.503014	0.291553	0.148664
	z.75	-0.00444803	0.834196	-0.276325	-0.0637781	-0.203528	0.652693	-0.0380158	0.058307
	z.76	0.0686351	0.92838	0.172015	0.202506	-0.168076	0.825785	0.368387	0.411585
	z.77	-0.617163	-0.540049	-0.00400692	0.00157319	-0.321855	-0.341955	-0.155464	-0.369944
	z.78	-0.217232	-0.544706	0.289604	-0.0897071	-0.146134	-0.239686	0.152927	-0.155099
	z.79	-0.822098	-0.205858	0.383481	-0.170168	-0.74933	0.204327	0.402614	-0.509859
	z.80	-0.537861	-0.609344	0.422897	-0.253312	-0.374308	-0.230685	0.31342	-0.429248
	z.81	0.249195	-0.632716	-0.56051	-0.12775	0.40365	-0.680615	-0.559417	-0.0033748
	z.82	-0.607792	0.34624	0.173038	-0.317457	-0.722583	0.493145	0.194784	-0.468606
	z.83	-0.370256	-0.676356	0.221175	-0.270783	-0.153614	-0.531429	-0.0361038	-0.589807
	z.84	0.433032	0.870934	-0.0391456	-0.106868	0.113728	0.538361	0.143743	0.155656
	z.85	-0.880792	0.0604843	-0.369805	-0.287143	-0.862789	0.280806	-0.228662	-0.461941
	z.86	-0.342723	-0.327012	-0.220713	-0.719014	-0.37538	-0.222845	-0.15628	-0.669001
	z.87	-0.0716367	0.790306	-0.414736	-0.240669	-0.266371	0.558743	-0.194304	-0.0713679
	z.88	0.20755	0.75045	-0.0944197	0.0778576	0.0311882	0.414651	-0.0645726	0.199085
	z.89	0.671844	-0.333105	-0.405913	0.01328	0.786792	-0.664466	-0.485643	0.14188
	z.90	0.14046	0.378593	0.730571	0.083979	-0.0688995	0.457772	0.668369	0.0805534
	z.91	-0.246768	-0.556377	-0.18867	-0.549454	-0.204962	-0.41419	-0.196195	-0.689609
	z.92	-0.554614	0.360995	0.241993	-0.530165	-0.649257	0.464908	0.398245	-0.521481
	z.93	-0.907654	-0.333187	0.046486	-0.0592753	-0.772987	0.101987	0.0889035	-0.330172
	z.94	-0.314238	-0.271498	-0.457841	0.0406298	-0.240211	-0.0588007	-0.251802	0.0976121
	z.95	-0.74554	-0.29237	0.131226	0.344766	-0.563069	0.14997	0.184611	0.113416
	z.96	0.936418	-0.166162	0.08047	-0.204191	0.902316	-0.495138	-0.00807179	0.111584
	z.97	-0.789541	0.447877	-0.114365	-0.338925	-0.908834	0.629253	0.141796	-0.402533
	z.98	-0.344758	-0.521556	-0.259311	-0.277412	-0.22972	-0.29193	-0.146416	-0.245124
	z.99	-0.369775	0.726225	-0.158663	0.0943041	-0.467234	0.631412	-0.0645092	0.0388154
	z.100	0.586549	0.493022	0.457273	-0.0438488	0.341269	0.257058	0.393164	0.139649
	z.101	-0.877862	0.364778	-0.14877	-0.159234	-0.924221	0.564012	0.0206632	-0.322327
	z.102	0.11983	0.973592	-0.182492	-0.0471074	-0.182164	0.751484	0.0855655	0.194012
	z.103	-0.678172	-0.462122	0.0965887	0.23886	-0.510715	0.00280507	0.116958	0.0484033
	z.104	-0.729504	-0.0349921	0.244602	-0.225097	-0.657247	0.213783	0.340308	-0.44432
	z.105	-0.425342	-0.595656	-0.224171	-0.337225	-0.303279	-0.342064	-0.164442	-0.395471
	z.106	-0.419928	-0.780616	0.234521	-0.0620689	-0.132243	-0.498052	0.0288693	-0.305098
	z.107	-0.314124	-0.69334	0.144464	0.107777	-0.0531835	-0.452931	-0.149967	-0.155278
	z.108	0.363229	0.532702	0.137798	0.406087	0.262822	0.388788	0.217598	0.409739
	z.109	0.842034	0.452184	0.134921	0.120991	0.625111	0.123113	0.144261	0.411593
	z.110	-0.208233	0.82672	-0.0369711	-0.190081	-0.464227	0.833602	0.347498	0.0770858
	z.111	-0.896797	-0.300289	-0.0112063	0.0216598	-0.718648	0.0819028	-0.0489887	-0.266041
	z.112	0.616286	0.243883	0.133753	0.0897839	0.512192	0.0358963	0.0671229	0.165182
	z.113	-0.71266	0.0579204	0.308454	-0.346933	-0.68055	0.253982	0.367004	-0.556797
	z.114	0.870802	0.256428	-0.364633	-0.0936345	0.71891	-0.176508	-0.28578	0.273716
	z.115	-0.393929	0.723873	0.15063	-0.0896894	-0.549866	0.794406	0.41916	0.0798297
	z.116	-0.0604522	0.703754	0.117686	-0.0209211	-0.276978	0.604016	0.288096	0.218169
	z.117	0.421344	0.425979	-0.392735	0.0287303	0.276487	0.0974207	-0.259122	0.338468
	z.118	0.338828	-0.333653	-0.454689	-0.340995	0.334684	-0.441804	-0.334571	-0.0998406
	z.119	-0.370536	0.698983	0.0393538	-0.208561	-0.656589	0.774832	0.280286	-0.0435032
	z.120	-0.25812	0.284124	0.134561	-0.200216	-0.343066	0.22292	0.213447	-0.325323
	z.121	-0.218245	-0.221316	-0.103456	0.572157	-0.0381722	-0.0553772	-0.19866	0.459371
	z.122	0.275776	-0.383214	0.0840231	-0.541966	0.363843	-0.449739	0.0891368	-0.385047
	z.123	0.0535316	-0.413322	-0.321433	0.34495	0.338688	-0.510102	-0.538753	0.122941
	z.124	0.704189	0.103399	0.457396	-0.169651	0.527572	-0.000168246	0.471343	0.152332
	z.125	0.698735	0.595039	0.170736	-0.0624839	0.484885	0.194297	0.159711	0.180576
	z.126	0.0209789	0.861274	0.187456	-0.0299489	-0.23634	0.809195	0.468616	0.0820914
	z.127	-0.160361	-0.421134	0.191427	0.400688	-0.0584086	-0.231825	-0.0604741	0.0147316
	z.128	-0.115702	-0.580592	0.310495	-0.340653	0.0218604	-0.502388	0.081003	-0.554089
	z.129	0.706123	-0.022255	0.425732	-0.131606	0.566554	-0.199671	0.362062	0.162466
	z.130	0.910506	0.173272	0.182494	-0.148208	0.769827	-0.179011	0.201364	0.180687
	z.131	0.703447	-0.125773	0.551999	0.174885	0.674508	-0.298202	0.335905	0.296064
	z.132	0.67545	0.350299	0.28789	-0.250432	0.458475	0.0505886	0.20128	-0.0223906
	z.133	-0.778707	-0.420251	-0.173727	-0.0277592	-0.575641	-0.0916902	-0.119186	-0.280752
	z.134	0.123875	0.353713	0.0167769	0.275294	0.0736635	0.360132	0.246647	0.31808
	z.135	0.779665	0.097091	0.266869	0.318036	0.787235	-0.205153	0.11022	0.392822
	z.136	0.511589	0.291278	0.41758	-0.403268	0.269123	0.0568227	0.379108	-0.115595
	z.137	-0.399076	0.775354	0.206432	0.0349532	-0.624654	0.883676	0.481628	0.0508061
	z.138	-0.232115	-0.405772	-0.264918	0.323216	-0.0758866	-0.236842	-0.356783	0.187282
	z.139	-0.566668	0.241109	0.257024	-0.205154	-0.606703	0.449785	0.432116	-0.27014
	z.140	0.758249	-0.299308	0.549133	-0.105269	0.738018	-0.446048	0.376885	0.0342088
	z.141	0.120417	-0.815822	0.226871	-0.207132	0.317038	-0.787324	-0.0284773	-0.282458
	z.142	0.0629215	0.135883	-0.45737	0.143005	0.0489567	0.176126	-0.208296	0.323843
	z.143	0.116754	-0.0240423	0.371265	-0.622804	0.0882991	-0.0887074	0.404196	-0.551242
	z.144	0.74674	0.241566	-0.241299	-0.31263	0.643473	-0.169086	-0.140514	0.0778027
	z.145	-0.941693	0.141827	0.0845472	-0.189568	-0.971978	0.501886	0.233234	-0.409891
	z.146	0.0322435	-0.182608	0.0370471	0.613861	0.251367	-0.200786	-0.157573	0.356651
	z.147	-0.901433	0.0253601	-0.01704	0.209449	-0.815169	0.338751	-0.0492978	-0.197116
	z.148	0.585527	0.0392279	0.609837	-0.323153	0.41315	-0.0973983	0.515538	-0.160631
	z.149	0.83565	0.492771	0.140605	0.0526943	0.639686	0.121395	0.186743	0.345425
	z.150	0.472959	0.0845525	-0.781015	0.155812	0.438696	-0.209549	-0.682447	0.30407
	z.151	-0.282525	0.800959	-0.00979438	-0.0878306	-0.477043	0.816894	0.326988	0.127911
	z.152	0.763437	-0.0641993	0.424171	0.376683	0.805738	-0.230339	0.294137	0.518511
	z.153	-0.636478	-0.0479763	0.183994	0.113361	-0.663704	0.303439	0.253405	-0.182881
	z.154	0.687195	-0.129587	0.53128	-0.314377	0.564775	-0.303092	0.407836	-0.081411
	z.155	-0.667956	0.569693	-0.139771	0.00821591	-0.771604	0.724295	0.0661846	-0.1687
	z.156	-0.888146	-0.0553726	0.00692293	-0.0658067	-0.783054	0.203671	0.00993603	-0.397851
	warmness	0.72758	0.215189	0.332459	0.180462	0.699007	0.000443478	0.353475	0.497001
	astringency	-0.47646	0.697607	-0.131581	-0.256821	-0.740286	0.766169	0.0825703	-0.186533
	sourness	-0.582617	0.254042	0.480032	-0.378368	-0.762559	0.491542	0.545719	-0.5125
	bitterness	0.26887	-0.0577044	-0.857821	0.0529356	0.326228	-0.414189	-0.92941	0.0428061
	clarity	-0.9373	0.0447956	-0.204325	0.0496499	-0.818916	0.344742	-0.0894189	-0.15002
	color tonality	0.12205	-0.604448	0.0781669	-0.578282	0.249388	-0.718786	-0.123134	-0.696773
	color intensity	0.196946	-0.598764	-0.319339	-0.564521	0.293043	-0.763772	-0.527502	-0.572917
	overall-intensity	0.24516	-0.505138	-0.166539	0.421268	0.387921	-0.500336	-0.383028	0.464415
	w vectors:
	Variable	w1	w2	w3	w4
	y.3	0.00877764	0.116586	-0.0594371	-0.0168136
	y.4	0.0439915	0.107543	-0.0555151	-0.0252685
	y.6	0.0394336	0.0736699	-0.0568924	0.00728266
	y.7	-0.110835	0.00320587	-0.0466731	0.00359051
	y.8	0.0087649	0.107239	-0.0439995	0.0352343
	y.10	0.0780412	0.0758566	-0.0366055	-0.0235679
	y.12	0.08903	0.013444	0.0276634	-0.0615436
	y.13	-0.113164	0.114611	-0.0368732	-0.0157588
	y.14	0.106451	0.054259	0.0198917	0.0132703
	y.15	0.0599792	-0.0387853	0.0307555	-0.0435519
	y.16	0.104632	-0.110577	0.0354426	-0.0421248
	y.17	0.128412	-0.0154752	0.0520136	0.029247
	y.18	0.103899	0.0454551	-0.0171155	-0.0344881
	y.19	0.0745772	0.0144583	-0.106115	-0.0857411
	y.21	0.0956796	0.0242359	-0.0721511	-0.0557478
	y.22	0.0948687	0.0258365	-0.0652498	-0.0533406
	y.23	0.109866	0.0232291	-0.00612025	-0.0431974
	y.26	0.0962198	0.0229813	-0.0612896	-0.0602629
	y.27	0.0945411	0.0124601	0.015692	-0.0933261
	y.28	0.0678027	0.0385237	-0.070465	-0.0874334
	y.29	0.0590533	0.0808806	-0.0247864	-0.0910674
	y.30	0.0593839	0.0480326	-0.0257105	-0.11143
	y.31	0.0651866	0.0539626	-0.0565512	-0.0949192
	y.32	0.0614979	0.0463016	-0.0268877	-0.116676
	y.33	0.105241	0.036968	-0.0465798	-0.0169379
	y.34	0.0617213	0.0484895	-0.0422211	-0.108068
	y.35	0.0691872	0.0477603	-0.0250567	-0.107144
	y.36	0.0697221	0.0267975	-0.0516268	-0.0998722
	y.37	0.0684505	0.0262684	-0.0615538	-0.0930117
	y.38	0.0676147	0.0496582	-0.0686458	-0.089328
	Total polyphenols	-0.0800438	-0.0232861	-0.0830965	0.0636012
	Lactic acid	0.111954	-0.0639242	0.0990878	0.0224058
	Tartaric acid	-0.000109492	0.124237	-0.083356	-0.0167924
	Acetic acid	0.0384477	-0.135482	-0.12832	-0.0854527
	z.1	-0.101936	-0.0264416	0.00639817	-0.0983642
	z.2	0.11571	-0.00490048	0.0961416	0.00579126
	z.3	-0.0942388	-0.06114	0.000972408	0.0185611
	z.4	-0.102585	-0.0505213	0.0174013	0.011496
	z.5	0.0475666	0.111756	-0.0348953	-0.0147373
	z.6	-0.0621294	0.0801895	-0.0661202	-0.115924
	z.7	0.0225113	0.0545454	-0.0538895	-0.045092
	z.8	-0.0965546	0.0604115	0.0621829	0.0644772
	z.9	-0.11218	0.123732	0.0198737	-0.0291534
	z.10	-0.0842596	-0.0521158	0.0552492	0.0226881
	z.11	0.0676475	-0.0875215	-0.0922643	-0.120015
	z.12	-0.0324345	-0.0950216	0.0874687	-0.0516473
	z.13	-0.112029	-0.0236724	0.075764	-0.0360409
	z.14	-0.0758912	-0.0620996	0.0962205	-0.0672873
	z.15	-0.0771049	0.0274029	0.104915	0.0264509
	z.16	0.105308	0.0404576	0.041781	-0.0371691
	z.17	0.0229821	-0.0497697	-0.00403817	0.0148951
	z.18	-0.00563483	-0.075476	0.127601	-0.0906296
	z.19	-0.0554734	-0.0930092	-0.0114382	0.0190173
	z.20	-0.0587227	-0.0456502	0.0493312	-0.0613459
	z.21	-0.057111	0.00128431	0.0156063	-0.0354759
	z.22	0.0403095	-0.0479624	-0.0855509	0.0461376
	z.23	-0.0536957	-0.0134618	-0.0285517	0.120912
	z.24	0.0175968	-0.0434935	0.0786718	-0.115894
	z.25	-0.0666131	0.0179307	0.0403397	-0.0399371
	z.26	0.00114276	-0.0486284	-0.0164013	0.0212586
	z.27	0.0102318	-0.106601	-0.0089382	0.0722801
	z.28	0.0494584	0.10637	0.0926642	0.0964007
	z.29	0.0860233	-0.139352	-0.0478556	0.0476896
	z.30	0.0927931	0.0525025	0.0779941	0.118001
	z.31	0.0269803	0.0732802	-0.137871	-0.0480804
	z.32	0.0284266	0.00843597	-0.04689	0.264475
	z.33	0.104197	-0.00476807	0.0456151	0.0957205
	z.34	-0.0946232	0.00543855	-0.137408	0.0145822
	z.35	0.0528735	0.0445656	0.092747	0.112962
	z.36	-0.0562434	-0.024919	-0.043788	-0.12136
	z.37	-0.00462793	-0.0926261	0.126759	0.0348308
	z.38	-0.0807942	0.0908519	-0.00372109	0.0980537
	z.39	-0.0166788	0.0772594	-0.0270774	-0.017819
	z.40	-0.00055185	-0.121064	0.0354036	0.0753853
	z.41	0.0196887	-0.00086846	-0.104021	-0.0729453
	z.42	-0.0137964	-0.0225725	0.120789	0.114779
	z.43	0.0208685	0.0922413	0.122144	-0.0414885
	z.44	-0.00126503	0.130475	-0.00636203	-0.0637623
	z.45	0.0374453	0.013579	0.216267	-0.0355734
	z.46	0.0451505	0.00333195	0.161276	-0.125773
	z.47	-0.1044	0.0949052	-0.0230709	-0.0464395
	z.48	0.0846904	0.0860074	0.0730712	0.0812039
	z.49	0.0452742	0.0811335	-0.0899948	0.116234
	z.50	0.0335487	0.118599	-0.0127954	-0.00351067
	z.51	0.081454	0.046885	0.0500326	0.0894519
	z.52	-0.0444863	0.0616655	0.112547	0.149999
	z.53	0.0566213	0.105479	0.0196872	0.00592043
	z.54	-0.0696422	-0.0633157	0.101687	0.0116351
	z.55	0.0663314	-0.0749208	-0.07869	-0.0443223
	z.56	0.0622504	0.0293995	-0.0616066	0.0214506
	z.57	-0.021697	0.0411405	-0.0679643	-0.0242506
	z.58	-0.0546629	0.0409497	0.135166	-0.0735044
	z.59	0.0554088	0.0785443	-0.0121632	-0.0704813
	z.60	0.057855	-0.0245833	0.144926	-0.0628509
	z.61	-0.0427079	-0.0905784	0.0303247	0.0359021
	z.62	0.0715046	0.0987075	0.0493994	-0.00357013
	z.63	-0.0998676	-0.0666496	0.0047559	-0.0413503
	z.64	0.0487126	-0.0244284	-0.0763815	-0.101171
	z.65	-0.089253	0.120862	0.0380785	0.00250821
	z.66	-0.0734331	0.109571	0.112384	0.0453707
	z.67	0.088544	0.00467037	0.151955	-0.0139845
	z.68	0.107594	0.0284992	0.065917	0.0206355
	z.69	-0.125441	0.00461652	-0.0608012	-0.0612707
	z.70	-0.016817	-0.072229	-0.0618809	0.0318746
	z.71	0.071449	-0.034903	-0.0625313	-0.0233882
	z.72	0.116473	-0.0406028	0.0131933	-0.00131996
	z.73	0.0599477	0.0289274	0.00523097	-0.044103
	z.74	0.0946114	-0.053559	0.121805	0.0353485
	z.75	-0.0279556	0.121644	-0.0688927	-0.0388827
	z.76	-0.0230748	0.159179	0.0345988	0.0754726
	z.77	-0.0442609	-0.107508	-0.0162879	-0.0292881
	z.78	-0.0200994	-0.0601231	0.0746689	0.00995002
	z.79	-0.103008	-0.019868	0.105072	-0.0692768
	z.80	-0.0514678	-0.0810798	0.115465	-0.0435235
	z.81	0.0554667	-0.109614	-0.0998369	0.00307104
	z.82	-0.0993205	0.0492248	0.0151421	-0.115916
	z.83	-0.021139	-0.12546	0.0302276	-0.11343
	z.84	0.0156556	0.1312	-0.013919	-0.0463052
	z.85	-0.118604	-0.00977012	-0.083495	-0.0803369
	z.86	-0.0516154	-0.0658622	-0.0258836	-0.174149
	z.87	-0.0365988	0.099331	-0.108955	-0.0758262
	z.88	0.00430352	0.0921386	-0.0657251	-0.00335237
	z.89	0.108141	-0.0767323	-0.0924916	-0.00525165
	z.90	-0.00945459	0.0955099	0.154826	0.00449226
	z.91	-0.028194	-0.0948404	-0.0184505	-0.175096
	z.92	-0.0892407	0.0477207	0.0695437	-0.138194
	z.93	-0.106264	-0.0450591	0.0284842	8.96285e-05
	z.94	-0.0330258	-0.0332066	-0.0546221	0.0708081
	z.95	-0.0774033	-0.0246347	0.0545692	0.131774
	z.96	0.124029	-0.0263657	0.0287824	-0.0415341
	z.97	-0.12492	0.0618137	-0.00988569	-0.0886151
	z.98	-0.0315926	-0.0789159	-0.00955778	-0.0207002
	z.99	-0.06421	0.0918561	-0.075888	-0.000535286
	z.100	0.0469266	0.0895	0.0824359	-0.0321501
	z.101	-0.127038	0.0433741	-0.0382072	-0.0486588
	z.102	-0.0250148	0.148892	-0.0431093	-0.0125535
	z.103	-0.0702115	-0.0473791	0.0498078	0.113533
	z.104	-0.0903486	-0.0115641	0.0783247	-0.0701253
	z.105	-0.0417073	-0.0939778	-0.0108384	-0.0576654
	z.106	-0.0181994	-0.122729	0.0539308	-0.00653457
	z.107	-0.00732888	-0.106837	0.00221276	0.0257605
	z.108	0.0361472	0.0983243	0.0281905	0.0706835
	z.109	0.0859435	0.0825016	0.0240988	0.0297122
	z.110	-0.0637889	0.141079	0.0304347	-0.00732152
	z.111	-0.0987948	-0.0480552	-0.0104344	0.017177
	z.112	0.0704162	0.0502511	0.0134682	-0.017419
	z.113	-0.0935508	-0.0028602	0.0792553	-0.113931
	z.114	0.0988271	0.0285166	-0.0764455	-0.0171981
	z.115	-0.0755637	0.120642	0.0529946	0.0221467
	z.116	-0.038055	0.108615	0.0262663	0.0364828
	z.117	0.0380145	0.0479508	-0.0904727	0.0367677
	z.118	0.0459944	-0.0586415	-0.0589688	-0.0546945
	z.119	-0.0902368	0.118627	0.0181106	-0.022177
	z.120	-0.0471555	0.0234359	0.0316983	-0.0988208
	z.121	-0.00524948	-0.0257824	-0.0419358	0.186674
	z.122	0.0500028	-0.0645465	0.0563743	-0.129341
	z.123	0.0465426	-0.0915744	-0.113747	0.0554595
	z.124	0.0725293	0.0497516	0.133134	-0.0145782
	z.125	0.0666682	0.0856813	0.0152081	-0.0418541
	z.126	-0.0324604	0.152721	0.0650715	-0.0253816
	z.127	-0.0080387	-0.0546522	0.0101619	0.0512911
	z.128	0.00298574	-0.102042	0.0600136	-0.130508
	z.129	0.0778808	0.0126014	0.112817	-0.00407045
	z.130	0.105827	0.0308898	0.0603419	-0.035349
	z.131	0.0927185	-0.00600113	0.113069	0.0500929
	z.132	0.0630317	0.0571866	0.0430167	-0.0894374
	z.133	-0.0791412	-0.0721546	-0.0183277	0.00500335
	z.134	0.0101412	0.0760622	0.0436057	0.0721761
	z.135	0.10822	0.016754	0.0386882	0.0549261
	z.136	0.0370004	0.0467884	0.0912928	-0.0981935
	z.137	-0.0858421	0.136963	0.0659532	0.0108331
	z.138	-0.0104416	-0.0606811	-0.0715274	0.105398
	z.139	-0.0833908	0.0440448	0.0868057	-0.0450847
	z.140	0.101444	-0.0297518	0.137311	-0.0317547
	z.141	0.0435553	-0.138612	0.0521923	-0.0494944
	z.142	0.00673743	0.0373396	-0.0638645	0.0839029
	z.143	0.0121355	-0.00829545	0.111997	-0.186184
	z.144	0.0884566	0.0211502	-0.0391679	-0.0670373
	z.145	-0.133606	0.0272713	0.0329328	-0.0526499
	z.146	0.03455	-0.0352532	-0.0285473	0.128496
	z.147	-0.112055	-0.000388788	-0.0335003	0.0198334
	z.148	0.0567949	0.0232046	0.146975	-0.100341
	z.149	0.0879472	0.0817329	0.0324544	0.00579552
	z.150	0.0603029	-0.00579314	-0.178498	0.0338438
	z.151	-0.0655513	0.132707	0.0252469	0.0191106
	z.152	0.110762	0.0109141	0.0988433	0.112073
	z.153	-0.0912328	0.0117533	0.0579667	0.00766877
	z.154	0.0776321	-0.00805655	0.132172	-0.0746865
	z.155	-0.106051	0.0881564	-0.0361216	-0.0305358
	z.156	-0.107645	-0.0246856	-0.0117525	-0.0428787
	w* vectors:
	Variable	w*1	w*2	w*3	w*4
	y.3	0.00877764	0.114351	-0.0415217	-0.00339224
	y.4	0.0439915	0.0963417	-0.039933	-0.0102012
	y.6	0.0394336	0.0636288	-0.0464628	0.0192583
	y.7	-0.110835	0.0314283	-0.0432598	-0.00193691
	y.8	0.0087649	0.105007	-0.0275386	0.0470834
	y.10	0.0780412	0.0559847	-0.0268507	-0.00959788
	y.12	0.08903	-0.00922602	0.027415	-0.0552635
	y.13	-0.113164	0.143427	-0.0160588	-0.0126677
	y.14	0.106451	0.0271531	0.0255379	0.0246405
	y.15	0.0599792	-0.054058	0.0231416	-0.0439332
	y.16	0.104632	-0.13722	0.0154805	-0.0454362
	y.17	0.128412	-0.0481732	0.0462285	0.0347756
	y.18	0.103899	0.018999	-0.0127724	-0.0221431
	y.19	0.0745772	-0.00453161	-0.105825	-0.0735844
	y.21	0.0956796	-0.000127353	-0.0708947	-0.0429581
	y.22	0.0948687	0.00167975	-0.0637229	-0.0408311
	y.23	0.109866	-0.00474643	-0.00539353	-0.0328295
	y.26	0.0962198	-0.00151951	-0.0602427	-0.0480949
	y.27	0.0945411	-0.0116132	0.0151455	-0.0861071
	y.28	0.0678027	0.0212588	-0.0662517	-0.0755977
	y.29	0.0590533	0.0658436	-0.0137504	-0.0786871
	y.30	0.0593839	0.0329114	-0.0197958	-0.101718
	y.31	0.0651866	0.0373639	-0.0498661	-0.0827023
	y.32	0.0614979	0.0306421	-0.0212981	-0.106891
	y.33	0.105241	0.0101702	-0.0435931	-0.00369095
	y.34	0.0617213	0.0327732	-0.0362968	-0.0972985
	y.35	0.0691872	0.0301429	-0.0194422	-0.0967634
	y.36	0.0697221	0.00904391	-0.0492891	-0.0898388
	y.37	0.0684505	0.00883861	-0.059265	-0.0826074
	y.38	0.0676147	0.0324412	-0.0626945	-0.0766707
	Total polyphenols	-0.0800438	-0.0029042	-0.0846163	0.0600064
	Lactic acid	0.111954	-0.0924315	0.0861944	0.0202633
	Tartaric acid	-0.000109492	0.124265	-0.064016	-0.00216297
	Acetic acid	0.0384477	-0.145273	-0.150418	-0.0873339
	z.1	-0.101936	-0.000485359	0.00496292	-0.108428
	z.2	0.11571	-0.0343641	0.0923364	0.00900084
	z.3	-0.0942388	-0.0371437	-0.00606592	0.00644916
	z.4	-0.102585	-0.0243998	0.0122352	-0.00118911
	z.5	0.0475666	0.0996437	-0.0187516	-0.000111729
	z.6	-0.0621294	0.0960098	-0.0520053	-0.110435
	z.7	0.0225113	0.0488133	-0.0459916	-0.0361157
	z.8	-0.0965546	0.0849976	0.0741246	0.0591949
	z.9	-0.11218	0.152297	0.0420818	-0.0281387
	z.10	-0.0842596	-0.0306604	0.049353	0.00928311
	z.11	0.0676475	-0.104747	-0.107665	-0.117587
	z.12	-0.0324345	-0.0867627	0.0735317	-0.0664548
	z.13	-0.112029	0.00485413	0.0750252	-0.0501767
	z.14	-0.0758912	-0.0427751	0.0885504	-0.0830078
	z.15	-0.0771049	0.0470364	0.111208	0.0176608
	z.16	0.105308	0.0136425	0.0453091	-0.0281569
	z.17	0.0229821	-0.0556218	-0.0123889	0.0126484
	z.18	-0.00563483	-0.0740412	0.116001	-0.103885
	z.19	-0.0554734	-0.0788838	-0.0244561	0.00774723
	z.20	-0.0587227	-0.0306974	0.0437699	-0.0720215
	z.21	-0.057111	0.0158267	0.0173079	-0.0403881
	z.22	0.0403095	-0.0582266	-0.094076	0.0495014
	z.23	-0.0536957	0.000210989	-0.0292351	0.117286
	z.24	0.0175968	-0.0479742	0.0714395	-0.122256
	z.25	-0.0666131	0.0348926	0.0448821	-0.045431
	z.26	0.00114276	-0.0489194	-0.0240002	0.0181277
	z.27	0.0102318	-0.109206	-0.0257992	0.0646022
	z.28	0.0494584	0.0937759	0.10792	0.104176
	z.29	0.0860233	-0.161256	-0.0718071	0.0448743
	z.30	0.0927931	0.0288742	0.083726	0.125237
	z.31	0.0269803	0.0664101	-0.127175	-0.0329049
	z.32	0.0284266	0.00119761	-0.0463244	0.269683
	z.33	0.104197	-0.0313003	0.0421332	0.100681
	z.34	-0.0946232	0.0295328	-0.134073	0.0150913
	z.35	0.0528735	0.0311022	0.0982932	0.11583
	z.36	-0.0562434	-0.0105975	-0.0461877	-0.125348
	z.37	-0.00462793	-0.0914477	0.112463	0.0202627
	z.38	-0.0807942	0.111425	0.0125441	0.0998543
	z.39	-0.0166788	0.0815064	-0.0146137	-0.0112181
	z.40	-0.00055185	-0.120923	0.0165749	0.0634305
	z.41	0.0196887	-0.00588188	-0.104674	-0.0662294
	z.42	-0.0137964	-0.0190594	0.117639	0.105684
	z.43	0.0208685	0.0869275	0.135953	-0.0385156
	z.44	-0.00126503	0.130797	0.0139793	-0.0526458
	z.45	0.0374453	0.00404413	0.217396	-0.0427638
	z.46	0.0451505	-0.00816491	0.160608	-0.130429
	z.47	-0.1044	0.121489	-0.00555419	-0.0450525
	z.48	0.0846904	0.0644423	0.0842311	0.090888
	z.49	0.0452742	0.0696051	-0.0785571	0.130962
	z.50	0.0335487	0.110056	0.00478193	0.00951691
	z.51	0.081454	0.0261441	0.0551883	0.0968149
	z.52	-0.0444863	0.0729932	0.123314	0.146085
	z.53	0.0566213	0.0910616	0.0346159	0.0178925
	z.54	-0.0696422	-0.0455824	0.0936635	-0.00400552
	z.55	0.0663314	-0.091811	-0.0920953	-0.0416366
	z.56	0.0622504	0.0135484	-0.0586675	0.0316608
	z.57	-0.021697	0.0466653	-0.0609904	-0.0189368
	z.58	-0.0546629	0.0548687	0.142977	-0.0810577
	z.59	0.0554088	0.0644354	-0.00139493	-0.0592124
	z.60	0.057855	-0.0393151	0.139579	-0.0680588
	z.61	-0.0427079	-0.0797035	0.0173495	0.0236363
	z.62	0.0715046	0.0805	0.0628827	0.00741308
	z.63	-0.0998676	-0.0412199	-0.00299197	-0.0545316
	z.64	0.0487126	-0.0368323	-0.0814645	-0.0956939
	z.65	-0.089253	0.143589	0.0592371	0.00404384
	z.66	-0.0734331	0.12827	0.131369	0.0433231
	z.67	0.088544	-0.0178759	0.150354	-0.0148454
	z.68	0.107594	0.00110205	0.0675237	0.0275814
	z.69	-0.125441	0.0365582	-0.0567843	-0.0670351
	z.70	-0.016817	-0.0679468	-0.0726809	0.0277802
	z.71	0.071449	-0.0530964	-0.0698425	-0.0178149
	z.72	0.116473	-0.0702608	0.00381102	0.00322116
	z.73	0.0599477	0.0136627	0.00815716	-0.0375295
	z.74	0.0946114	-0.0776502	0.110982	0.0316245
	z.75	-0.0279556	0.128763	-0.0492242	-0.0272683
	z.76	-0.0230748	0.165055	0.0599812	0.0852719
	z.77	-0.0442609	-0.0962377	-0.0318573	-0.0406906
	z.78	-0.0200994	-0.0550051	0.0658394	-0.000378827
	z.79	-0.103008	0.00636146	0.104688	-0.0839317
	z.80	-0.0514678	-0.0679744	0.104198	-0.0600097
	z.81	0.0554667	-0.123738	-0.118356	0.0031444
	z.82	-0.0993205	0.0745152	0.0254153	-0.119924
	z.83	-0.021139	-0.120077	0.011256	-0.127007
	z.84	0.0156556	0.127214	0.00609022	-0.0334908
	z.85	-0.118604	0.0204304	-0.0818972	-0.0856325
	z.86	-0.0516154	-0.0527191	-0.0347777	-0.182129
	z.87	-0.0365988	0.10865	-0.0925323	-0.0646574
	z.88	0.00430352	0.0910428	-0.0514972	0.00802154
	z.89	0.108141	-0.104269	-0.107278	0.00107932
	z.90	-0.00945459	0.0979173	0.169941	0.00382186
	z.91	-0.028194	-0.0876612	-0.0324708	-0.184144
	z.92	-0.0892407	0.0704444	0.0793178	-0.144372
	z.93	-0.106264	-0.0180005	0.024265	-0.01298
	z.94	-0.0330258	-0.0247971	-0.0589223	0.0683992
	z.95	-0.0774033	-0.00492524	0.0527702	0.121203
	z.96	0.124029	-0.0579477	0.0214175	-0.0360465
	z.97	-0.12492	0.0936227	0.00302005	-0.0921805
	z.98	-0.0315926	-0.0708713	-0.0210101	-0.0291269
	z.99	-0.06421	0.108206	-0.0599026	0.00627467
	z.100	0.0469266	0.0775509	0.0951324	-0.0254446
	z.101	-0.127038	0.0757223	-0.0281158	-0.0524666
	z.102	-0.0250148	0.155262	-0.019277	0.000228968
	z.103	-0.0702115	-0.0295009	0.0442795	0.10184
	z.104	-0.0903486	0.0114418	0.0789004	-0.0817807
	z.105	-0.0417073	-0.0833577	-0.024369	-0.06803
	z.106	-0.0181994	-0.118095	0.035307	-0.020882
	z.107	-0.00732888	-0.104971	-0.0142233	0.0161938
	z.108	0.0361472	0.08912	0.0425439	0.0801102
	z.109	0.0859435	0.0606175	0.0346801	0.0417076
	z.110	-0.0637889	0.157322	0.0540705	-0.00182632
	z.111	-0.0987948	-0.0228987	-0.0153164	0.00640495
	z.112	0.0704162	0.0323208	0.0194381	-0.0087158
	z.113	-0.0935508	0.020961	0.0812699	-0.125145
	z.114	0.0988271	0.00335181	-0.0746056	-0.00359857
	z.115	-0.0755637	0.139883	0.0737589	0.0239104
	z.116	-0.038055	0.118305	0.0441724	0.0413848
	z.117	0.0380145	0.038271	-0.0840089	0.048215
	z.118	0.0459944	-0.0703532	-0.0693056	-0.0531646
	z.119	-0.0902368	0.141604	0.0389471	-0.0198766
	z.120	-0.0471555	0.0354433	0.0365859	-0.101975
	z.121	-0.00524948	-0.0244457	-0.0458107	0.186285
	z.122	0.0500028	-0.0772789	0.0450131	-0.133922
	z.123	0.0465426	-0.103426	-0.129224	0.0570917
	z.124	0.0725293	0.0312832	0.138971	-0.0118966
	z.125	0.0666682	0.0687053	0.0267912	-0.0305616
	z.126	-0.0324604	0.160987	0.0896955	-0.0183769
	z.127	-0.0080387	-0.0526053	0.00186683	0.0456174
	z.128	0.00298574	-0.102802	0.0440527	-0.141876
	z.129	0.0778808	-0.00722965	0.11273	-0.00305063
	z.130	0.105827	0.0039426	0.0623671	-0.0280484
	z.131	0.0927185	-0.0296104	0.109697	0.0506441
	z.132	0.0630317	0.0411366	0.0502603	-0.0822163
	z.133	-0.0791412	-0.0520026	-0.0274774	-0.00592234
	z.134	0.0101412	0.07348	0.0551779	0.0770341
	z.135	0.10822	-0.0108023	0.0384504	0.0623347
	z.136	0.0370004	0.0373668	0.0976024	-0.0962383
	z.137	-0.0858421	0.158822	0.0895282	0.0125345
	z.138	-0.0104416	-0.0580223	-0.0806976	0.103232
	z.139	-0.0833908	0.0652789	0.0958538	-0.0520223
	z.140	0.101444	-0.0555829	0.130013	-0.033783
	z.141	0.0435553	-0.149703	0.0294725	-0.0605154
	z.142	0.00673743	0.035624	-0.0582299	0.0907901
	z.143	0.0121355	-0.0113856	0.110387	-0.191722
	z.144	0.0884566	-0.00137388	-0.0382019	-0.0567299
	z.145	-0.133606	0.061292	0.0406905	-0.061934
	z.146	0.03455	-0.0440508	-0.0349428	0.129572
	z.147	-0.112055	0.0281441	-0.0306145	0.0132406
	z.148	0.0567949	0.00874271	0.149093	-0.101746
	z.149	0.0879472	0.0593386	0.0428634	0.0174464
	z.150	0.0603029	-0.0211483	-0.180986	0.0469683
	z.151	-0.0655513	0.149399	0.0476259	0.0240433
	z.152	0.110762	-0.0172897	0.0976296	0.116097
	z.153	-0.0912328	0.0349842	0.0621949	-0.00106306
	z.154	0.0776321	-0.0278243	0.128876	-0.0764007
	z.155	-0.106051	0.115161	-0.0196118	-0.0291646
	z.156	-0.107645	0.00272436	-0.0127643	-0.0522876
	c vectors:
	Variable	c1	c2	c3	c4
	warmness	0.0921777	0.0345107	0.0802839	0.0520648
	astringency	-0.0603631	0.111878	-0.031775	-0.074095
	sourness	-0.0738122	0.0407418	0.115921	-0.109162
	bitterness	0.0340633	-0.00925429	-0.207151	0.0152724
	clarity	-0.118747	0.00718406	-0.0493414	0.0143244
	color tonality	0.0154626	-0.0969378	0.0188762	-0.166839
	color intensity	0.0249513	-0.0960262	-0.0771156	-0.162869
	overall-intensity	0.0310595	-0.081011	-0.0402167	0.121539
	p vectors:
	Variable	p1	p2	p3	p4
	y.3	0.0436907	0.132689	-0.0405273	-0.0181349
	y.4	0.0755757	0.12134	-0.0499915	-0.0243296
	y.6	0.0620025	0.0969107	-0.0179918	0.0114532
	y.7	-0.101431	0.0179732	-0.0273039	-0.0144848
	y.8	0.0362539	0.123707	-0.0177854	0.0378435
	y.10	0.102235	0.0849689	-0.0389545	-0.0297651
	y.12	0.104383	0.0218203	0.0350892	-0.0767084
	y.13	-0.0785032	0.11917	-0.0403035	-0.0203609
	y.14	0.119085	0.0496156	0.0226614	0.0158438
	y.15	0.0672988	-0.0578061	0.00865127	-0.0776088
	y.16	0.0801124	-0.110181	0.0145831	-0.0564586
	y.17	0.118282	-0.0229271	0.0624476	0.0377044
	y.18	0.118233	0.0528208	-0.0162019	-0.033125
	y.19	0.0893486	0.0365676	-0.127938	-0.102522
	y.21	0.108603	0.0385848	-0.0735352	-0.0668884
	y.22	0.107645	0.0409571	-0.0744966	-0.076211
	y.23	0.119691	0.0293419	-0.0133642	-0.0600226
	y.26	0.109822	0.0368579	-0.0770325	-0.075243
	y.27	0.109135	0.0173053	-0.0104671	-0.112427
	y.28	0.09128	0.0535568	-0.0918385	-0.112075
	y.29	0.0911547	0.0919002	-0.0304013	-0.0965721
	y.30	0.0892988	0.0588119	-0.0406637	-0.134307
	y.31	0.0924388	0.0670533	-0.0738169	-0.111493
	y.32	0.0901748	0.0550395	-0.0486945	-0.138246
	y.33	0.117188	0.0474385	-0.0478173	-0.0192774
	y.34	0.0897631	0.0595953	-0.0630092	-0.13066
	y.35	0.0963526	0.0566083	-0.0429129	-0.125671
	y.36	0.0926657	0.0394254	-0.0733974	-0.128822
	y.37	0.0906692	0.0389728	-0.0855531	-0.124147
	y.38	0.0931037	0.0659383	-0.0827303	-0.105874
	Total polyphenols	-0.0879836	-0.0123966	-0.0990653	0.0485621
	Lactic acid	0.0905871	-0.0756593	0.0876868	0.0134506
	Tartaric acid	0.0329209	0.144144	-0.0671927	-0.00318041
	Acetic acid	0.0130273	-0.107411	-0.139618	-0.108921
	z.1	-0.104284	-0.00508449	0.0239627	-0.0793166
	z.2	0.106609	-0.0230945	0.0852308	0.0217211
	z.3	-0.107908	-0.0678034	-0.0205249	-0.00207069
	z.4	-0.114422	-0.0573649	0.00115639	-0.0136152
	z.5	0.075531	0.123526	-0.0189092	0.00210946
	z.6	-0.0326269	0.108943	-0.0404671	-0.0438771
	z.7	0.0363099	0.0481789	-0.101916	-0.0464289
	z.8	-0.0943078	0.0450485	0.0319066	0.0280398
	z.9	-0.0779099	0.122561	0.00843028	-0.0390398
	z.10	-0.103803	-0.0602316	0.0600816	0.00730203
	z.11	0.0542368	-0.0537394	-0.120471	-0.129895
	z.12	-0.0538806	-0.0994674	0.0669254	-0.0586226
	z.13	-0.116598	-0.0318482	0.0753811	-0.0284566
	z.14	-0.0909818	-0.0628407	0.0855676	-0.0657624
	z.15	-0.0800972	-0.0035833	0.0806966	0.0248037
	z.16	0.115904	0.0394962	0.0451627	-0.0360076
	z.17	0.00474284	-0.0673342	-0.0672666	-0.0179354
	z.18	-0.0213823	-0.0864354	0.118227	-0.118984
	z.19	-0.0767987	-0.0999228	0.00797436	0.0336572
	z.20	-0.073101	-0.0423657	0.0378961	-0.0953196
	z.21	-0.058099	-0.00396669	0.0217667	-0.0541375
	z.22	0.0250553	-0.0377511	-0.117615	0.0331397
	z.23	-0.0669797	-0.00280353	-0.0359819	0.0979079
	z.24	0.0214521	-0.0561274	0.103891	-0.1094
	z.25	-0.0652805	0.0193972	0.0667765	-0.0500301
	z.26	-0.0122821	-0.0469621	-0.0456369	0.0341659
	z.27	-0.0200524	-0.121362	-0.00762861	0.0478951
	z.28	0.059762	0.0889498	0.0887837	0.109825
	z.29	0.0494276	-0.136388	-0.0463795	0.023691
	z.30	0.0892873	0.0355297	0.0973306	0.137597
	z.31	0.0510146	0.100055	-0.14978	-0.0489376
	z.32	0.00645141	-0.0128074	-0.0530389	0.229394
	z.33	0.0878031	-0.0160019	0.0517539	0.118875
	z.34	-0.0931537	0.0219923	-0.146906	0.000115929
	z.35	0.0607133	0.0293771	0.111878	0.0945553
	z.36	-0.0638317	0.0131371	-0.0275825	-0.0623455
	z.37	-0.0262141	-0.122542	0.116985	0.0201195
	z.38	-0.0607477	0.0939722	0.0135977	0.0704343
	z.39	0.0106463	0.0760204	-0.0777315	-0.0524941
	z.40	-0.0424992	-0.126543	0.0606469	0.0928999
	z.41	0.0318142	0.00992185	-0.157024	-0.115242
	z.42	-0.0375024	-0.0440289	0.129444	0.141026
	z.43	0.0538149	0.0664327	0.0661045	-0.0979863
	z.44	0.0340131	0.126017	-0.0289577	-0.0551242
	z.45	0.0469962	-0.0190673	0.205539	-0.0450251
	z.46	0.0611393	-0.0122606	0.151954	-0.136568
	z.47	-0.0732997	0.0980943	-0.0102643	-0.058284
	z.48	0.0970098	0.0582651	0.0430854	0.0635035
	z.49	0.051197	0.0854087	-0.0526275	0.136226
	z.50	0.060646	0.129304	-0.00335924	-0.0152016
	z.51	0.082835	0.0385718	0.0195827	0.0714257
	z.52	-0.0348295	0.0201151	0.116518	0.161939
	z.53	0.0839278	0.100027	-0.00897877	-0.00924987
	z.54	-0.0905909	-0.0762418	0.114872	0.0236295
	z.55	0.0579898	-0.0650906	-0.116278	-0.0807365
	z.56	0.0707713	0.0389871	-0.0641603	0.0582172
	z.57	-0.0032893	0.0549117	-0.0483953	0.0205405
	z.58	-0.0437669	0.0344959	0.175889	-0.0264729
	z.59	0.0752263	0.0910332	-0.0209207	-0.0922246
	z.60	0.062229	-0.043641	0.162471	-0.0647963
	z.61	-0.0610156	-0.103863	0.0331038	0.00459006
	z.62	0.0969572	0.0790187	0.0256533	-0.00921868
	z.63	-0.113558	-0.0637579	0.010207	-0.0385496
	z.64	0.0596617	-0.0137807	-0.11669	-0.150714
	z.65	-0.0501218	0.106007	-0.0014574	-0.0555372
	z.66	-0.0549595	0.0772469	0.0585711	-0.0144177
	z.67	0.0845648	-0.012604	0.15776	0.0073184
	z.68	0.113225	0.0179411	0.0394378	-0.0125434
	z.69	-0.116925	0.0177995	-0.0645338	-0.0675475
	z.70	-0.0322746	-0.0744988	-0.113769	-0.0207584
	z.71	0.0661568	-0.0306979	-0.0243049	-0.0141844
	z.72	0.0958543	-0.0343173	0.0420448	0.0482632
	z.73	0.0748094	0.0502579	0.0430746	-0.0426059
	z.74	0.0724708	-0.0733236	0.140502	0.0591811
	z.75	-0.000563524	0.133783	-0.0667283	-0.0184005
	z.76	0.00869543	0.148888	0.0415391	0.0584247
	z.77	-0.0781889	-0.0866097	-0.000967612	0.000453877
	z.78	-0.0275213	-0.0873567	0.069935	-0.0258812
	z.79	-0.104152	-0.0330142	0.092605	-0.0490947
	z.80	-0.0681421	-0.0977229	0.102123	-0.0730827
	z.81	0.0315707	-0.101471	-0.135355	-0.036857
	z.82	-0.0770017	0.0555278	0.0417862	-0.0915891
	z.83	-0.046908	-0.10847	0.0534105	-0.0781231
	z.84	0.0548611	0.139675	-0.00945307	-0.0308323
	z.85	-0.111588	0.0097001	-0.0893023	-0.0828432
	z.86	-0.0434198	-0.0524442	-0.053299	-0.207441
	z.87	-0.00907572	0.126744	-0.100153	-0.069435
	z.88	0.0262947	0.120353	-0.022801	0.0224625
	z.89	0.0851165	-0.0534214	-0.098022	0.00383139
	z.90	0.017795	0.0607165	0.176422	0.0242286
	z.91	-0.0312633	-0.0892283	-0.045561	-0.158522
	z.92	-0.0702645	0.0578942	0.0584378	-0.152957
	z.93	-0.114991	-0.0534345	0.0112257	-0.0171014
	z.94	-0.0398111	-0.0435412	-0.110562	0.011722
	z.95	-0.094453	-0.0468886	0.0316892	0.0994678
	z.96	0.118635	-0.0266481	0.0194323	-0.0589108
	z.97	-0.100028	0.0718279	-0.0276174	-0.0977826
	z.98	-0.0436776	-0.0836441	-0.0626198	-0.0800358
	z.99	-0.0468471	0.116468	-0.0383147	0.0272075
	z.100	0.0743103	0.0790679	0.110425	-0.0126507
	z.101	-0.111217	0.0585009	-0.0359259	-0.0459405
	z.102	0.0151814	0.156139	-0.0440692	-0.0135909
	z.103	-0.0859182	-0.0741124	0.0233247	0.0689131
	z.104	-0.0924215	-0.00561183	0.0590679	-0.0649422
	z.105	-0.0538869	-0.0955277	-0.054134	-0.0972923
	z.106	-0.0532011	-0.12519	0.0566334	-0.0179074
	z.107	-0.0397967	-0.111194	0.0348859	0.0310946
	z.108	0.0460178	0.0854316	0.0332762	0.117159
	z.109	0.106678	0.0725185	0.0325814	0.034907
	z.110	-0.0263812	0.132584	-0.00892797	-0.0548399
	z.111	-0.113616	-0.0481585	-0.00270615	0.00624903
	z.112	0.0780778	0.0391125	0.0322994	0.0259034
	z.113	-0.0902875	0.00928893	0.0744872	-0.100093
	z.114	0.110323	0.0411243	-0.0880534	-0.0270143
	z.115	-0.0499072	0.11609	0.036375	-0.0258761
	z.116	-0.00765873	0.112864	0.0284196	-0.00603591
	z.117	0.0533804	0.068316	-0.0948397	0.00828893
	z.118	0.0429264	-0.0535093	-0.109801	-0.0983798
	z.119	-0.0469435	0.112099	0.00950337	-0.0601715
	z.120	-0.0327014	0.0455661	0.0324946	-0.0577639
	z.121	-0.0276497	-0.0354933	-0.0249831	0.165072
	z.122	0.0349383	-0.0614575	0.0202903	-0.156362
	z.123	0.00678196	-0.0662861	-0.0776213	0.0995209
	z.124	0.0892142	0.0165826	0.110454	-0.0489457
	z.125	0.0885233	0.0954287	0.0412303	-0.0180271
	z.126	0.00265783	0.138126	0.0452678	-0.00864051
	z.127	-0.0203163	-0.0675389	0.0462267	0.115602
	z.128	-0.0146584	-0.0931119	0.07498	-0.0982813
	z.129	0.0894592	-0.00356912	0.102808	-0.0379693
	z.130	0.115353	0.0277883	0.0440696	-0.0427593
	z.131	0.0891203	-0.0201707	0.1333	0.0504558
	z.132	0.0855733	0.0561789	0.0695211	-0.0722516
	z.133	-0.098655	-0.0673973	-0.0419524	-0.00800876
	z.134	0.0156938	0.0567264	0.00405137	0.0794246
	z.135	0.0987763	0.0155709	0.064445	0.0917559
	z.136	0.0648136	0.0467135	0.100839	-0.116346
	z.137	-0.0505592	0.124347	0.0498502	0.0100843
	z.138	-0.0294069	-0.0650752	-0.0639737	0.0932505
	z.139	-0.0717916	0.0386677	0.0620675	-0.0591887
	z.140	0.0960631	-0.0480012	0.132607	-0.0303708
	z.141	0.0152557	-0.130837	0.0547861	-0.0597594
	z.142	0.00797158	0.0217921	-0.110448	0.0412581
	z.143	0.0147917	-0.00385577	0.0896551	-0.179684
	z.144	0.0946051	0.0387409	-0.0582702	-0.0901963
	z.145	-0.119304	0.0227453	0.0204169	-0.0546921
	z.146	0.00408495	-0.0292856	0.00894634	0.177104
	z.147	-0.114203	0.00406711	-0.00411491	0.0604277
	z.148	0.0741809	0.00629114	0.147267	-0.0932322
	z.149	0.105869	0.0790276	0.0339539	0.0152027
	z.150	0.0599195	0.01356	-0.188604	0.0449531
	z.151	-0.0357933	0.128453	-0.0023652	-0.0253398
	z.152	0.0967205	-0.0102959	0.102431	0.108676
	z.153	-0.0806359	-0.00769415	0.0444319	0.0327056
	z.154	0.0870613	-0.0207824	0.128296	-0.0907005
	z.155	-0.0846239	0.091364	-0.0337526	0.00237036
	z.156	-0.11252	-0.00888032	0.00167179	-0.0189858
	Scores on t:
	Observation	t1	t2	t3	t4
	A2	-4.84241	-2.76714	-1.74142	5.63199
	A_CC_C1	-5.69456	-4.98421	-0.35247	-1.6054
	A_CC_C2	-7.36059	-5.61789	-1.62361	-3.72092
	A_CC_CC1	-8.01627	0.967301	1.87437	1.26149
	A_CC_CC2	-8.89732	3.18768	4.81631	-0.451037
	C2	6.68322	-4.08704	-7.53082	-3.21462
	D1	2.92021	10.8671	-1.30025	-0.934573
	D2	3.21668	10.3226	-2.3713	0.411404
	E1	11.972	-2.8714	7.57467	-3.34616
	E2	10.019	-5.01697	0.654522	5.96784
	A1	-7.278	-2.31492	1.07976	-0.990402
	C1	11.1886	-4.62493	-7.03135	-3.12788
	Standardized scores on t:
	Observation	t1	t2	t3	t4
	A2	-0.204496	-0.147926	-0.140176	0.541625
	A_CC_C1	-0.240483	-0.266446	-0.0283721	-0.154391
	A_CC_C2	-0.31084	-0.300321	-0.130693	-0.357838
	A_CC_CC1	-0.338529	0.05171	0.150878	0.121317
	A_CC_CC2	-0.375736	0.170407	0.387689	-0.043376
	C2	0.282234	-0.218485	-0.606194	-0.309148
	D1	0.123321	0.580932	-0.104664	-0.0898773
	D2	0.135841	0.551824	-0.190878	0.0395645
	E1	0.505582	-0.153499	0.609724	-0.321799
	E2	0.423105	-0.268197	0.0526858	0.573924
	A1	-0.307352	-0.123751	0.0869155	-0.0952464
	C1	0.472496	-0.24724	-0.565989	-0.300806
	Scores on u:
	Observation	u1	u2	u3	u4
	A2	-2.15323	-0.401102	-1.37595	6.96066
	A_CC_C1	-5.02606	-5.18251	-2.18387	-2.03633
	A_CC_C2	-3.8427	-10.4563	-2.51413	-5.2566
	A_CC_CC1	-10.9745	2.47535	1.93254	-0.534834
	A_CC_CC2	-9.32035	5.98696	6.94185	2.11947
	C2	6.79221	-5.40193	-5.23124	-1.63964
	D1	-0.988894	11.3386	-0.563547	-2.06607
	D2	-0.675739	6.98139	-4.55303	0.523712
	E1	10.1241	-0.648699	7.82713	-3.09124
	E2	16.0651	-4.69182	-0.279752	5.02088
	Scores on u~:
	Observation	u~1	u~2	u~3	u~4
	A2	-2.15323	1.28408	-1.69427	6.01082
	A_CC_C1	-5.02606	-3.20077	-2.89262	-3.46864
	A_CC_C2	-3.8427	-7.89475	-3.27085	-6.93574
	A_CC_CC1	-10.9745	5.26505	2.478	-1.71754
	A_CC_CC2	-9.32035	9.08327	7.95588	0.898984
	C2	6.79221	-7.72772	-6.32011	-0.691683
	D1	-0.988894	10.3224	1.40638	-0.223071
	D2	-0.675739	5.86197	-2.70161	2.4092
	E1	10.1241	-4.81503	6.73673	-2.13214
	E2	16.0651	-8.17849	-1.69754	5.84982
	Q² quality index:
	Component	Comp1	Comp2	Comp3	Comp4
	warmness	0.369242	-0.0149902	0.047145	-0.122887
	astringency	-0.0383419	0.512756	-0.0563863	-0.0258141
	sourness	0.0843227	-0.0182223	0.120032	-0.0358731
	bitterness	-0.247285	-0.244043	0.356204	-0.0401433
	clarity	0.760299	-0.0722026	0.0803582	-0.094865
	color tonality	-0.233237	0.243584	-0.106111	0.0697934
	color intensity	-0.133799	0.214977	0.00879328	0.106593
	overall-intensity	-0.0591029	-0.156335	-0.043458	0.0106709
	Total	0.0627622	0.0756471	0.0761093	0.00993003
	Cumulative Q² quality index:
	Component	Comp1	Comp2	Comp3	Comp4
	warmness	0.369242	0.359787	0.38997	0.315005
	astringency	-0.0383419	0.494074	0.465547	0.451751
	sourness	0.0843227	0.067637	0.179551	0.150119
	bitterness	-0.247285	-0.551676	0.00103724	-0.0390644
	clarity	0.760299	0.742992	0.763645	0.741223
	color tonality	-0.233237	0.0671597	-0.0318248	0.0401897
	color intensity	-0.133799	0.109942	0.117768	0.211808
	overall-intensity	-0.0591029	-0.224678	-0.2779	-0.264264
	Total	0.0627622	0.133662	0.199598	0.207546
	Variable Importance in the Projection (VIP):
	Variable	VIP(1)	Standard deviation	Lower bound(95%)	Upper bound(95%)	VIP(2)	Standard deviation	Lower bound(95%)	Upper bound(95%)	VIP(3)	Standard deviation	Lower bound(95%)	Upper bound(95%)	VIP(4)	Standard deviation	Lower bound(95%)	Upper bound(95%)
	z.32	0.391833	0.600256	-0.966041	1.74971	0.307165	0.32378	-0.425276	1.03961	0.419968	0.938827	-1.70381	2.54374	1.57987	0.970194	-0.61486	3.7746
	z.45	0.516148	0.571863	-0.777496	1.80979	0.410617	0.551398	-0.836732	1.65797	1.54264	0.722544	-0.0918692	3.17715	1.41468	0.666095	-0.0921317	2.92149
	Acetic acid	0.529965	0.839429	-1.36896	2.42889	1.27919	0.621388	-0.126487	2.68487	1.41943	0.652996	-0.0577452	2.89661	1.37979	0.532201	0.175866	2.58371
	z.46	0.622357	0.680524	-0.917096	2.16181	0.473811	0.485249	-0.623899	1.57152	1.19204	1.0863	-1.26534	3.64943	1.30432	0.7104	-0.302712	2.91136
	z.143	0.167276	0.433291	-0.812896	1.14745	0.147242	0.489777	-0.96071	1.25519	0.78781	0.702979	-0.802439	2.37806	1.29456	0.713081	-0.318542	2.90766
	z.9	1.54629	0.733148	-0.112207	3.20478	1.61551	0.381311	0.752928	2.4781	1.40249	0.342533	0.627626	2.17735	1.28359	0.332176	0.532158	2.03503
	z.152	1.52676	0.589233	0.193818	2.85969	1.16415	0.449392	0.147553	2.18074	1.21751	0.272504	0.601062	1.83395	1.2815	0.311389	0.577094	1.98591
	z.29	1.18575	0.711928	-0.424745	2.79624	1.5399	0.365154	0.713859	2.36593	1.37121	0.29434	0.705366	2.03705	1.27439	0.262345	0.680922	1.86785
	z.137	1.18325	0.730242	-0.46867	2.83517	1.52146	0.388263	0.643153	2.39978	1.39189	0.344029	0.613642	2.17014	1.26436	0.331134	0.515283	2.01344
	z.52	0.613201	0.672249	-0.907533	2.13393	0.722824	0.67057	-0.794112	2.23976	1.00018	0.797974	-0.804961	2.80532	1.25682	0.637679	-0.185711	2.69935
	y.13	1.55985	0.665998	0.0532593	3.06645	1.56832	0.355213	0.764771	2.37186	1.37888	0.309192	0.679438	2.07832	1.25433	0.313681	0.544732	1.96392
	z.150	0.831218	0.721606	-0.801169	2.4636	0.633692	0.528567	-0.562011	1.82939	1.35466	0.379766	0.495573	2.21376	1.24459	0.345368	0.463314	2.02587
	z.91	0.388628	0.67892	-1.14719	1.92445	0.899768	0.439909	-0.0953751	1.89491	0.787815	0.541747	-0.437701	2.01333	1.24147	0.370113	0.404219	2.07873
	z.66	1.01221	0.81162	-0.823808	2.84822	1.24728	0.593976	-0.0963867	2.59095	1.33033	0.629075	-0.0927381	2.75339	1.23528	0.589738	-0.0988036	2.56935
	z.76	0.318064	0.559371	-0.94732	1.58345	1.44685	0.295016	0.779478	2.11422	1.27284	0.287457	0.622567	1.92311	1.2349	0.245931	0.678567	1.79123
	z.140	1.39831	0.572482	0.103262	2.69335	1.09538	0.474167	0.0227422	2.16802	1.34318	0.580473	0.0300582	2.6563	1.23243	0.529594	0.0344093	2.43046
	z.11	0.932456	0.566304	-0.348613	2.21353	1.05695	0.563861	-0.218591	2.33249	1.11536	0.659015	-0.375435	2.60616	1.22803	0.558899	-0.036287	2.49235
	z.97	1.72191	0.577349	0.415856	3.02796	1.42076	0.481271	0.332047	2.50947	1.22935	0.445705	0.221092	2.2376	1.22796	0.374693	0.380343	2.07557
	z.92	1.2301	0.616993	-0.165637	2.62583	1.02783	0.536543	-0.185916	2.24157	1.01072	0.490688	-0.0992947	2.12073	1.21766	0.364548	0.392995	2.04232
	Lactic acid	1.54318	0.626812	0.125235	2.96113	1.30498	0.520334	0.127903	2.48206	1.32068	0.332205	0.569178	2.07218	1.20521	0.342778	0.429795	1.98063
	z.67	1.22049	0.698619	-0.359892	2.80088	0.928279	0.557834	-0.333629	2.19019	1.32509	0.452782	0.300826	2.34936	1.20493	0.400455	0.299034	2.11082
	y.16	1.44226	0.528414	0.246902	2.63761	1.47745	0.268302	0.870507	2.08439	1.2999	0.226175	0.788262	1.81155	1.20437	0.220126	0.706406	1.70232
	z.85	1.63484	0.496406	0.511889	2.75779	1.24524	0.397399	0.346258	2.14421	1.222	0.239017	0.681304	1.76269	1.20252	0.238536	0.662912	1.74212
	z.86	0.71147	0.851199	-1.21408	2.63702	0.800379	0.363507	-0.0219317	1.62269	0.714434	0.654296	-0.765687	2.19455	1.19975	0.429668	0.227774	2.17173
	z.148	0.782864	0.816394	-1.06395	2.62967	0.630126	0.465259	-0.422363	1.68261	1.15643	0.924703	-0.935398	3.24825	1.19964	0.680558	-0.339884	2.73917
	z.30	1.27906	0.650145	-0.191666	2.7498	1.07975	0.357981	0.269935	1.88956	1.07856	0.330023	0.331999	1.82513	1.19394	0.311801	0.488602	1.89929
	z.89	1.49062	0.75499	-0.217287	3.19852	1.32499	0.564096	0.0489155	2.60106	1.31247	0.409386	0.386372	2.23857	1.19113	0.365102	0.365217	2.01705
	z.126	0.447435	0.700764	-1.1378	2.03267	1.41024	0.486176	0.310432	2.51004	1.29939	0.359485	0.486176	2.1126	1.18802	0.339259	0.420567	1.95548
	z.90	0.130323	0.452535	-0.893382	1.15403	0.861644	0.596334	-0.487358	2.21065	1.3074	0.505761	0.163288	2.45151	1.18643	0.47114	0.120638	2.25222
	z.28	0.681736	0.742461	-0.997827	2.3613	1.0849	0.432289	0.106997	2.06281	1.13678	0.453418	0.111079	2.16249	1.17304	0.363935	0.349759	1.99631
	z.145	1.84163	0.387861	0.964231	2.71903	1.42046	0.354602	0.618294	2.22263	1.24829	0.318989	0.526685	1.96989	1.17293	0.318396	0.452665	1.89319
	z.74	1.30413	0.751346	-0.395536	3.00379	1.10101	0.624812	-0.312411	2.51443	1.27269	0.325628	0.536068	2.00931	1.1727	0.337798	0.408546	1.93685
	z.34	1.30429	0.594366	-0.0402592	2.64884	0.992201	0.485017	-0.104984	2.08939	1.28243	0.546046	0.04719	2.51768	1.16656	0.506484	0.0208142	2.31231
	z.69	1.72909	0.441979	0.729265	2.72892	1.31442	0.384588	0.44442	2.18442	1.21147	0.27752	0.583673	1.83926	1.15508	0.28428	0.511995	1.79817
	z.79	1.41987	0.434944	0.435961	2.40378	1.09342	0.310267	0.391544	1.79529	1.19346	0.164376	0.821619	1.56531	1.15486	0.145137	0.826537	1.48318
	z.101	1.7511	0.354928	0.948199	2.554	1.38611	0.326926	0.646552	2.12567	1.22652	0.273149	0.608614	1.84442	1.14796	0.244483	0.594906	1.70102
	z.65	1.23027	0.923152	-0.858048	3.31858	1.43072	0.462748	0.383912	2.47753	1.26399	0.420535	0.312671	2.2153	1.14685	0.327603	0.405761	1.88794
	z.110	0.879269	0.866085	-1.07995	2.83849	1.42997	0.291412	0.77075	2.08919	1.25333	0.275377	0.630381	1.87627	1.13788	0.249349	0.573814	1.70195
	z.154	1.07008	0.665092	-0.434457	2.57463	0.816253	0.508817	-0.334772	1.96728	1.1572	0.831438	-0.723639	3.03805	1.13566	0.70324	-0.455182	2.7265
	z.48	1.16738	0.475878	0.0908657	2.24389	1.17508	0.375282	0.326137	2.02403	1.13486	0.315466	0.421227	1.8485	1.13213	0.269768	0.521869	1.74239
	z.121	0.072359	0.26262	-0.521728	0.666446	0.237507	0.257449	-0.344883	0.819897	0.356158	0.684153	-1.1915	1.90382	1.12941	0.903599	-0.914673	3.17349
	z.113	1.28951	0.38493	0.418738	2.16028	0.980108	0.295759	0.311054	1.64916	1.00979	0.204137	0.547996	1.47158	1.1294	0.305062	0.439305	1.8195
	z.83	0.291381	0.561173	-0.978081	1.56084	1.14593	0.521991	-0.0348932	2.32676	1.012	0.406099	0.0933355	1.93066	1.12934	0.509909	-0.0241576	2.28283
	z.119	1.24383	0.969455	-0.949233	3.43689	1.42244	0.497243	0.297597	2.54728	1.2353	0.439489	0.241104	2.22949	1.12808	0.344571	0.348606	1.90756
	z.47	1.43905	0.816842	-0.408776	3.28688	1.38524	0.517953	0.213549	2.55693	1.20742	0.455883	0.176136	2.23869	1.12803	0.463138	0.0803407	2.17572
	z.2	1.59495	0.47085	0.529812	2.66009	1.21264	0.405249	0.295905	2.12938	1.24216	0.281283	0.605854	1.87847	1.12746	0.263215	0.532023	1.72289
	z.141	0.600369	0.640893	-0.849431	2.05017	1.32331	0.401009	0.416168	2.23046	1.19928	0.339853	0.430485	1.96808	1.12526	0.269745	0.515051	1.73546
	y.17	1.77003	0.397678	0.870425	2.66964	1.35201	0.364938	0.526462	2.17756	1.22257	0.281949	0.58476	1.86039	1.12207	0.289522	0.467126	1.77702
	z.82	1.36904	0.403963	0.45521	2.28287	1.12988	0.343165	0.353583	1.90617	0.981774	0.345763	0.199603	1.76394	1.11578	0.339327	0.34817	1.88339
	z.87	0.50448	0.642845	-0.949737	1.9587	0.969197	0.619387	-0.431954	2.37035	1.12835	0.332639	0.375866	1.88083	1.11409	0.284555	0.470383	1.7578
	z.49	0.624062	0.565616	-0.65545	1.90357	0.868046	0.420761	-0.083781	1.81987	0.976055	0.44583	-0.0324823	1.98459	1.11276	0.347977	0.325581	1.89994
	z.115	1.04157	0.783257	-0.730276	2.81342	1.33985	0.462504	0.293596	2.38611	1.21459	0.446478	0.204584	2.22459	1.1094	0.422474	0.153694	2.0651
	z.128	0.0411556	0.381175	-0.821122	0.903434	0.915006	0.290177	0.258579	1.57143	0.89356	0.303807	0.206302	1.58082	1.10889	0.398011	0.20853	2.00926
	z.155	1.46181	0.498042	0.335158	2.58846	1.363	0.39955	0.459158	2.26685	1.20394	0.351819	0.408068	1.99981	1.10653	0.306601	0.412953	1.80011
	z.60	0.797477	0.669594	-0.71725	2.3122	0.644733	0.503656	-0.494616	1.78408	1.14996	0.859253	-0.793805	3.09372	1.1051	0.760858	-0.616078	2.82628
	z.102	0.344805	0.478661	-0.738002	1.42761	1.35981	0.232343	0.834215	1.88541	1.2123	0.183783	0.796551	1.62804	1.10227	0.17409	0.708448	1.49609
	z.18	0.0776708	0.584255	-1.24401	1.39935	0.678967	0.509184	-0.472886	1.83082	1.0624	0.463752	0.0133205	2.11148	1.09777	0.367094	0.267342	1.92819
	z.6	0.856395	0.503215	-0.281957	1.99475	0.969454	0.519072	-0.204768	2.14368	0.955065	0.427023	-0.0109286	1.92106	1.09656	0.31387	0.386539	1.80658
	z.151	0.903562	0.76222	-0.820698	2.62782	1.37322	0.322916	0.642731	2.1037	1.19924	0.267992	0.592996	1.80548	1.09364	0.265752	0.492468	1.69481
	z.81	0.764555	0.7133	-0.849043	2.37815	1.14125	0.508193	-0.00836542	2.29086	1.20517	0.504045	0.0649389	2.3454	1.09354	0.462276	0.0477994	2.13928
	z.58	0.753476	0.674085	-0.771412	2.27836	0.680017	0.613907	-0.708737	2.06877	1.10705	0.378987	0.249721	1.96438	1.09103	0.240379	0.547259	1.63481
	z.124	0.999747	0.685153	-0.550176	2.54967	0.880795	0.422568	-0.0751188	1.83671	1.19716	0.491619	0.0850379	2.30927	1.08941	0.456424	0.0569063	2.12191
	z.123	0.641546	0.658215	-0.84744	2.13053	0.954516	0.522695	-0.227902	2.13693	1.14171	0.327196	0.401545	1.88188	1.08458	0.324177	0.351238	1.81792
	z.131	1.27804	0.570052	-0.0115115	2.56758	0.972544	0.488437	-0.132377	2.07746	1.1498	0.310679	0.446993	1.8526	1.08283	0.245866	0.526642	1.63902
	z.38	1.11367	0.524432	-0.0726756	2.30002	1.17427	0.481793	0.0843806	2.26416	1.01481	0.386379	0.140763	1.88886	1.08204	0.296003	0.412436	1.75164
	z.96	1.70962	0.246721	1.1515	2.26775	1.32029	0.217413	0.828469	1.81212	1.158	0.196078	0.714444	1.60156	1.07785	0.181577	0.667089	1.4886
	z.31	0.371898	0.611368	-1.01111	1.75491	0.71493	0.526802	-0.476779	1.90664	1.13908	0.236635	0.603772	1.67438	1.07036	0.217019	0.579434	1.5613
	z.13	1.54422	0.285315	0.898792	2.18965	1.19233	0.203572	0.731815	1.65284	1.15659	0.0930293	0.946138	1.36703	1.06992	0.0954345	0.85403	1.28581
	z.95	1.06693	0.4731	-0.00329731	2.13716	0.840181	0.300967	0.159346	1.52101	0.818758	0.420186	-0.13177	1.76929	1.06554	0.321201	0.338933	1.79215
	z.33	1.43626	0.815918	-0.409473	3.282	1.09211	0.612543	-0.293557	2.47778	0.995225	0.518826	-0.178441	2.16889	1.05981	0.578045	-0.247814	2.36744
	z.37	0.0637916	0.465015	-0.988146	1.11573	0.831506	0.62181	-0.575126	2.23814	1.13593	0.287822	0.484832	1.78703	1.05018	0.293937	0.385244	1.71511
	z.8	1.33091	0.523141	0.147487	2.51434	1.14704	0.458349	0.11018	2.1839	1.08089	0.484097	-0.01421	2.176	1.04947	0.461871	0.00464736	2.0943
	z.43	0.287653	0.790267	-1.50006	2.07536	0.855049	0.462176	-0.190466	1.90056	1.12456	0.493434	0.0083316	2.24078	1.04823	0.408683	0.123722	1.97273
	z.14	1.04609	0.406742	0.125975	1.9662	0.970287	0.316373	0.254601	1.68597	1.07184	0.197887	0.624184	1.51949	1.04775	0.236237	0.513347	1.58216
	z.80	0.709435	0.506652	-0.436693	1.85556	0.904725	0.404389	-0.0100662	1.81952	1.11955	0.239745	0.577211	1.66189	1.04659	0.21356	0.563484	1.52969
	y.19	1.02798	0.52878	-0.168207	2.22416	0.791733	0.308661	0.0934939	1.48997	1.00523	0.455164	-0.0244218	2.03488	1.03866	0.335295	0.280174	1.79715
	z.122	0.689241	0.464439	-0.361392	1.73987	0.78029	0.455917	-0.251066	1.81165	0.779473	0.460813	-0.262957	1.8219	1.0307	0.514242	-0.132595	2.194
	z.1	1.40509	0.156969	1.05	1.76018	1.09357	0.122059	0.817453	1.36969	0.945809	0.149812	0.606912	1.28471	1.03029	0.244231	0.477802	1.58278
	z.42	0.190171	0.808087	-1.63785	2.01819	0.248594	0.462315	-0.797236	1.29442	0.86557	0.632725	-0.565754	2.29689	1.0293	0.391141	0.144475	1.91412
	z.35	0.728811	0.566819	-0.553423	2.01105	0.682752	0.738449	-0.987735	2.35324	0.873183	0.587847	-0.456619	2.20298	1.02783	0.500846	-0.10516	2.16082
	Tartaric acid	0.00150924	0.399986	-0.903323	0.906341	1.11338	0.369344	0.277868	1.9489	1.12252	0.274932	0.500578	1.74446	1.02305	0.252147	0.452658	1.59345
	z.75	0.385341	0.537484	-0.830531	1.60121	1.12878	0.635543	-0.308921	2.56647	1.08614	0.46829	0.0267924	2.14548	1.01086	0.447855	-0.00225977	2.02398
	z.68	1.48309	0.322894	0.752648	2.21352	1.15543	0.235207	0.623359	1.68751	1.09809	0.167374	0.719467	1.47672	1.00341	0.168623	0.621957	1.38486
	z.72	1.60547	0.611838	0.221396	2.98954	1.27295	0.52546	0.0842809	2.46163	1.10355	0.460475	0.06188	2.14521	1.00123	0.283735	0.359375	1.64308
	z.130	1.45873	0.303033	0.773217	2.14424	1.14239	0.21438	0.657431	1.62735	1.07216	0.228612	0.555002	1.58931	0.994074	0.187382	0.570186	1.41796
	z.44	0.0174373	0.53235	-1.18682	1.2217	1.16936	0.577596	-0.137251	2.47597	1.01121	0.517745	-0.160012	2.18243	0.989094	0.479323	-0.0952098	2.0734
	z.103	0.967798	0.216821	0.477314	1.45828	0.849119	0.224787	0.340615	1.35762	0.810978	0.292703	0.148838	1.47312	0.987197	0.424652	0.0265676	1.94783
	z.104	1.24537	0.344396	0.466291	2.02445	0.951893	0.255835	0.373153	1.53063	0.985859	0.185134	0.567058	1.40466	0.982481	0.240076	0.439392	1.52557
	z.40	0.00760672	0.633561	-1.42561	1.44082	1.08496	0.27249	0.468543	1.70137	0.969009	0.244863	0.415091	1.52293	0.981774	0.175175	0.585502	1.37805
	z.135	1.4917	0.590584	0.155709	2.8277	1.1433	0.41738	0.199124	2.08748	1.02359	0.343102	0.247442	1.79974	0.981734	0.357113	0.173888	1.78958
	y.21	1.31885	0.434077	0.336902	2.3008	1.02534	0.252219	0.454777	1.5959	1.01761	0.279206	0.386005	1.64922	0.978167	0.218022	0.484968	1.47137
	z.63	1.37658	0.259216	0.790193	1.96297	1.20446	0.190408	0.773731	1.6352	1.04109	0.170526	0.655337	1.42685	0.974482	0.150869	0.633194	1.31577
	z.84	0.215798	0.593294	-1.12633	1.55792	1.18716	0.193681	0.749022	1.6253	1.03016	0.165073	0.656741	1.40358	0.972408	0.127191	0.684682	1.26013
	z.16	1.45157	0.33177	0.701058	2.20209	1.16098	0.198803	0.711252	1.6107	1.04409	0.186575	0.622031	1.46616	0.971459	0.162671	0.603471	1.33945
	z.114	1.36224	0.289578	0.707167	2.01731	1.06612	0.167044	0.688234	1.444	1.06299	0.159167	0.702926	1.42305	0.969541	0.158839	0.610223	1.32886
	z.54	0.959951	0.47523	-0.115095	2.035	0.924094	0.303067	0.238509	1.60968	1.06567	0.186231	0.644388	1.48696	0.969187	0.173946	0.575694	1.36268
	z.139	1.14946	0.45761	0.114277	2.18465	0.95842	0.426696	-0.00683412	1.92367	1.02407	0.449431	0.00738188	2.04075	0.965154	0.340251	0.195453	1.73485
	y.14	1.46732	0.217551	0.975186	1.95945	1.2163	0.142487	0.893973	1.53863	1.05983	0.122671	0.782328	1.33733	0.964609	0.11547	0.703397	1.22582
	z.51	1.12277	0.47462	0.0490992	2.19643	0.950942	0.353743	0.15072	1.75116	0.891945	0.383594	0.0241965	1.75969	0.961127	0.410334	0.0328879	1.88937
	z.99	0.885074	0.537241	-0.330249	2.1004	1.06296	0.430525	0.0890421	2.03687	1.05869	0.327912	0.316903	1.80048	0.96051	0.323514	0.228671	1.69235
	z.62	0.985623	0.463295	-0.0624229	2.03367	1.15902	0.314423	0.447745	1.87029	1.0584	0.253242	0.485529	1.63127	0.960464	0.210275	0.484789	1.43614
	z.129	1.07351	0.569272	-0.214271	2.3613	0.823438	0.445363	-0.184042	1.83092	1.05802	0.522446	-0.123831	2.23988	0.960188	0.475274	-0.114956	2.03533
	y.26	1.3263	0.331407	0.576604	2.07599	1.02856	0.175133	0.632376	1.42473	0.985203	0.22623	0.473435	1.49697	0.959681	0.181844	0.548321	1.37104
	y.7	1.52776	0.311875	0.822251	2.23327	1.16115	0.296916	0.489482	1.83282	1.05418	0.24362	0.503071	1.60528	0.956634	0.172532	0.56634	1.34693
	y.27	1.30316	0.361555	0.485265	2.12105	0.99642	0.2234	0.491054	1.50179	0.8677	0.154957	0.517162	1.21824	0.955221	0.131149	0.658542	1.2519
	z.12	0.447078	0.565486	-0.832139	1.7263	0.916812	0.410995	-0.0129229	1.84655	0.99802	0.310621	0.295346	1.7007	0.95368	0.271324	0.339903	1.56746
	y.33	1.45064	0.168371	1.06976	1.83152	1.15092	0.0969747	0.931544	1.37029	1.04556	0.0912412	0.839162	1.25197	0.953663	0.0954375	0.737768	1.16956
	y.23	1.51439	0.247183	0.955226	2.07356	1.16932	0.132486	0.869615	1.46902	1.0111	0.105408	0.772651	1.24955	0.950895	0.0896163	0.748169	1.15362
	y.22	1.30767	0.421869	0.353341	2.26201	1.0202	0.242137	0.472444	1.56795	0.990956	0.259555	0.403802	1.57811	0.950744	0.203581	0.490213	1.41128
	z.147	1.54456	0.232185	1.01933	2.0698	1.17357	0.171313	0.786032	1.56111	1.04021	0.138495	0.726911	1.3535	0.950713	0.149241	0.613107	1.28832
	z.15	1.06282	0.425885	0.0993978	2.02624	0.844047	0.428401	-0.125063	1.81316	1.03061	0.335207	0.27232	1.7889	0.947519	0.325805	0.210497	1.68454
	z.149	1.21227	0.358006	0.402403	2.02214	1.17682	0.203645	0.716146	1.6375	1.04135	0.164399	0.669457	1.41325	0.94537	0.145604	0.61599	1.27475
	z.93	1.46475	0.178374	1.06125	1.86826	1.18392	0.119474	0.91365	1.45419	1.04176	0.113208	0.785662	1.29785	0.94514	0.106565	0.704072	1.18621
	z.109	1.18465	0.324012	0.451684	1.91762	1.16483	0.266488	0.561993	1.76767	1.02014	0.23025	0.499279	1.541	0.94142	0.214004	0.45731	1.42553
	z.55	0.914315	0.55554	-0.342404	2.17103	0.966133	0.503297	-0.172405	2.10467	0.997531	0.55802	-0.264797	2.25986	0.940785	0.53386	-0.26689	2.14846
	y.38	0.932004	0.567229	-0.351158	2.21517	0.836366	0.299019	0.159938	1.51279	0.865548	0.340358	0.0956054	1.63549	0.940656	0.198123	0.492469	1.38884
	z.106	0.250862	0.505217	-0.89202	1.39374	1.11626	0.320749	0.390674	1.84184	1.03449	0.22274	0.530616	1.53836	0.939309	0.193805	0.500893	1.37773
	y.18	1.43215	0.192501	0.996677	1.86761	1.1619	0.0905777	0.956997	1.3668	1.0108	0.0755317	0.839938	1.18167	0.938598	0.0642196	0.793323	1.08387
	z.156	1.48378	0.183373	1.06896	1.8986	1.14888	0.165234	0.775096	1.52266	0.995897	0.169845	0.611681	1.38011	0.937104	0.126994	0.649823	1.22439
	Total polyphenols	1.10333	0.390369	0.220252	1.9864	0.863895	0.297146	0.191703	1.53609	0.94328	0.407476	0.0215054	1.86506	0.931846	0.30691	0.237568	1.62612
	y.29	0.813993	0.609015	-0.563693	2.19168	0.952833	0.290994	0.29456	1.61111	0.840969	0.27558	0.217563	1.46438	0.927823	0.151014	0.586205	1.26944
	y.31	0.898535	0.592786	-0.44244	2.23951	0.836637	0.309262	0.137037	1.53624	0.822522	0.331824	0.0718846	1.57316	0.927185	0.175317	0.530589	1.32378
	z.136	0.510015	0.810527	-1.32352	2.34355	0.570948	0.398136	-0.329698	1.47159	0.803077	0.48611	-0.296581	1.90274	0.924611	0.437175	-0.0643482	1.91357
	z.4	1.41403	0.155938	1.06128	1.76679	1.16589	0.103466	0.931831	1.39994	1.01446	0.0946646	0.800314	1.22861	0.922784	0.0848078	0.730936	1.11463
	z.100	0.646838	0.648339	-0.819806	2.11348	0.940674	0.261061	0.350114	1.53123	0.993942	0.344785	0.213984	1.7739	0.92082	0.306831	0.226719	1.61492
	y.32	0.847689	0.683152	-0.697707	2.39309	0.766167	0.363422	-0.0559503	1.58829	0.687726	0.3704	-0.150177	1.52563	0.920231	0.131994	0.621639	1.21882
	y.35	0.953679	0.624428	-0.458874	2.36623	0.841579	0.331066	0.0926557	1.5905	0.74758	0.318689	0.0266557	1.4685	0.919693	0.118706	0.65116	1.18823
	y.4	0.606381	0.494634	-0.512559	1.72532	1.06824	0.287037	0.418919	1.71756	1.00011	0.227969	0.484413	1.51582	0.919109	0.190264	0.488702	1.34951
	y.28	0.934596	0.563989	-0.341237	2.21043	0.789585	0.294194	0.124072	1.4551	0.839403	0.349694	0.0483405	1.63046	0.914815	0.211216	0.437012	1.39262
	y.34	0.850769	0.659654	-0.641471	2.34301	0.778902	0.346593	-0.00514622	1.56295	0.733975	0.365214	-0.0921969	1.56015	0.914292	0.151422	0.571752	1.25683
	y.3	0.120991	0.605678	-1.24915	1.49113	1.04885	0.29917	0.372084	1.72562	0.995651	0.260364	0.406666	1.58464	0.908554	0.238016	0.370124	1.44698
	z.5	0.65566	0.460668	-0.386443	1.69776	1.11859	0.272826	0.501411	1.73576	0.996275	0.219353	0.500064	1.49249	0.907905	0.198562	0.458726	1.35708
	z.36	0.775261	0.295185	0.107506	1.44302	0.629957	0.352285	-0.166968	1.42688	0.623371	0.321622	-0.104188	1.35093	0.902691	0.845839	-1.01073	2.81611
	z.24	0.242556	0.360634	-0.573256	1.05837	0.431151	0.340197	-0.338429	1.20073	0.66106	0.424365	-0.29892	1.62104	0.900617	0.404039	-0.0133839	1.81462
	y.36	0.961052	0.602836	-0.402658	2.32476	0.768687	0.342986	-0.00720113	1.54458	0.754623	0.375915	-0.0957564	1.605	0.896635	0.180269	0.488837	1.30443
	y.30	0.818551	0.688402	-0.738722	2.37582	0.756372	0.356974	-0.0511594	1.5639	0.677386	0.363672	-0.145296	1.50007	0.891622	0.111474	0.639451	1.14379
	z.3	1.29899	0.237154	0.762511	1.83547	1.12887	0.126251	0.843269	1.41447	0.975283	0.109889	0.726698	1.22387	0.89135	0.0974912	0.67081	1.11189
	y.37	0.943525	0.597928	-0.409082	2.29613	0.754556	0.333687	-0.000296392	1.50941	0.779444	0.382352	-0.0854964	1.64438	0.889282	0.213163	0.407074	1.37149
	z.111	1.36179	0.238442	0.822399	1.90118	1.12074	0.162815	0.752426	1.48905	0.970943	0.144288	0.644542	1.29734	0.886504	0.124519	0.604823	1.16819
	z.53	0.780471	0.549283	-0.462094	2.02304	1.11589	0.317506	0.397639	1.83414	0.973686	0.268147	0.367094	1.58028	0.884048	0.230843	0.361844	1.40625
	z.50	0.462438	0.630461	-0.963765	1.88864	1.11942	0.215784	0.631287	1.60756	0.971172	0.178518	0.567336	1.37501	0.881337	0.158561	0.522646	1.24003
	z.132	0.868833	0.564634	-0.408458	2.14612	0.835724	0.27537	0.212794	1.45865	0.781322	0.267932	0.175218	1.38743	0.878246	0.177392	0.476959	1.27953
	y.10	1.07572	0.330675	0.327686	1.82376	1.0631	0.197323	0.616724	1.50948	0.952946	0.162054	0.586354	1.31954	0.875295	0.127996	0.585748	1.16484
	z.138	0.143927	0.413978	-0.792555	1.08041	0.554695	0.196838	0.109417	0.999973	0.690068	0.365692	-0.137186	1.51732	0.874818	0.391098	-0.00990602	1.75954
	z.64	0.671457	0.713957	-0.943626	2.28654	0.555162	0.588528	-0.776182	1.88651	0.714968	0.632492	-0.715829	2.14576	0.874508	0.375216	0.0257097	1.72331
	z.108	0.498255	0.626294	-0.918519	1.91503	0.959041	0.376105	0.108233	1.80985	0.851339	0.372614	0.00842807	1.69425	0.87435	0.259649	0.286983	1.46172
	z.144	1.21929	0.336186	0.458783	1.9798	0.94561	0.224474	0.437816	1.4534	0.860998	0.264003	0.263783	1.45821	0.872482	0.282242	0.234006	1.51096
	z.116	0.524552	0.629154	-0.898693	1.9478	1.05181	0.588336	-0.279095	2.38272	0.926804	0.486755	-0.174312	2.02792	0.86704	0.434607	-0.116108	1.85019
	z.10	1.16144	0.293046	0.498521	1.82436	0.998437	0.181643	0.587532	1.40934	0.944001	0.17389	0.550635	1.33737	0.866491	0.153674	0.518856	1.21413
	z.27	0.141035	0.327155	-0.59904	0.881111	0.961319	0.197699	0.514093	1.40854	0.832824	0.180882	0.423641	1.24201	0.863998	0.246239	0.306967	1.42103
	z.77	0.610095	0.548532	-0.63077	1.85096	1.06918	0.518574	-0.103921	2.24227	0.930585	0.449159	-0.0854827	1.94665	0.861182	0.429291	-0.109942	1.83231
	z.125	0.918957	0.392508	0.0310435	1.80687	1.03784	0.167813	0.658224	1.41746	0.902816	0.140804	0.584294	1.22134	0.854268	0.14198	0.533086	1.17545
	z.146	0.476239	0.318672	-0.244646	1.19712	0.48036	0.243162	-0.0697106	1.03043	0.459885	0.562413	-0.812382	1.73215	0.853817	0.549061	-0.388246	2.09588
	z.23	0.740144	0.389488	-0.14094	1.62123	0.575158	0.307672	-0.120843	1.27116	0.534966	0.304829	-0.154604	1.22454	0.852592	0.280637	0.217748	1.48744
	z.153	1.25756	0.601587	-0.103328	2.61844	0.961283	0.474958	-0.113146	2.03571	0.922832	0.43979	-0.0720414	1.91771	0.838424	0.399807	-0.066003	1.74285
	y.12	1.22719	0.372175	0.385275	2.06911	0.940176	0.243916	0.3884	1.49195	0.834637	0.191352	0.401768	1.26751	0.837074	0.199504	0.385764	1.28838
	z.133	1.09089	0.386333	0.216939	1.96483	1.05126	0.203233	0.591511	1.511	0.917077	0.180038	0.509802	1.32435	0.832529	0.162837	0.464167	1.20089
	y.8	0.120816	0.300169	-0.558214	0.799846	0.965421	0.413542	0.0299229	1.90092	0.888222	0.384316	0.0188384	1.75761	0.83133	0.340523	0.0610131	1.60165
	z.59	0.763757	0.577353	-0.542306	2.06982	0.912262	0.285006	0.267534	1.55699	0.792638	0.264798	0.193624	1.39165	0.827101	0.302673	0.142407	1.51179
	z.105	0.574896	0.473711	-0.496712	1.6465	0.948742	0.203716	0.487904	1.40958	0.82309	0.197133	0.377143	1.26904	0.818168	0.13024	0.523544	1.11279
	z.19	0.764648	0.447207	-0.247006	1.7763	1.01602	0.237991	0.477651	1.5544	0.881355	0.208431	0.409851	1.35286	0.807179	0.205682	0.341893	1.27246
	z.41	0.27139	0.497218	-0.853395	1.39618	0.20635	0.382864	-0.659748	1.07245	0.743783	0.437045	-0.244881	1.73245	0.79636	0.371643	-0.0443558	1.63708
	z.61	0.588688	0.433831	-0.392707	1.57008	0.926817	0.536877	-0.287683	2.14132	0.827912	0.446352	-0.181806	1.83763	0.779432	0.481014	-0.308697	1.86756
	z.88	0.05932	0.275448	-0.563787	0.682427	0.826952	0.32483	0.0921351	1.56177	0.847688	0.329822	0.101579	1.5938	0.769315	0.312733	0.0618645	1.47677
	z.107	0.101022	0.440716	-0.895948	1.09799	0.960516	0.23038	0.439359	1.48167	0.829958	0.190359	0.399335	1.26058	0.767651	0.132522	0.467866	1.06744
	z.22	0.555628	0.749885	-1.14073	2.25199	0.602475	0.531679	-0.600265	1.80522	0.789691	0.402617	-0.121091	1.70047	0.764752	0.349899	-0.026775	1.55628
	z.117	0.523993	0.400404	-0.381784	1.42977	0.585808	0.356359	-0.220332	1.39195	0.806585	0.368991	-0.0281312	1.6413	0.76219	0.320477	0.0372218	1.48716
	z.71	0.984856	0.478376	-0.0973064	2.06702	0.81104	0.394291	-0.0809084	1.70299	0.824246	0.367545	-0.00719806	1.65569	0.759995	0.373678	-0.0853229	1.60531
	z.20	0.809437	0.576023	-0.493618	2.11249	0.738653	0.394998	-0.154896	1.6322	0.724222	0.346303	-0.0591706	1.50762	0.747128	0.314282	0.0361737	1.45808
	z.118	0.633989	0.495494	-0.486896	1.75487	0.712898	0.481712	-0.37681	1.80261	0.739523	0.461681	-0.304873	1.78392	0.742088	0.451083	-0.278333	1.76251
	z.120	0.649994	0.472548	-0.418984	1.71897	0.536671	0.420804	-0.415253	1.4886	0.513212	0.41007	-0.41443	1.44085	0.738243	0.431421	-0.2377	1.71419
	z.134	0.139786	0.450056	-0.878311	1.15788	0.689876	0.432172	-0.287766	1.66752	0.668468	0.467132	-0.388259	1.72519	0.736809	0.415626	-0.203402	1.67702
	y.6	0.543555	0.324248	-0.189946	1.27705	0.778745	0.34216	0.00472474	1.55276	0.780134	0.354389	-0.0215494	1.58182	0.709039	0.328485	-0.0340463	1.45212
	z.112	0.970621	0.216318	0.481276	1.45997	0.864107	0.178377	0.460591	1.26762	0.752358	0.174721	0.357112	1.1476	0.69001	0.149677	0.351418	1.0286
	z.142	0.092869	0.435324	-0.891902	1.07764	0.341987	0.297356	-0.330679	1.01465	0.532768	0.322004	-0.195657	1.26119	0.685731	0.334541	-0.0710532	1.44252
	z.56	0.858062	0.416217	-0.0834862	1.79961	0.703183	0.290025	0.0471005	1.35927	0.742935	0.240712	0.198406	1.28746	0.685407	0.220211	0.187256	1.18356
	z.70	0.231806	0.513762	-0.930404	1.39402	0.670832	0.190795	0.239225	1.10244	0.721393	0.337189	-0.0413821	1.48417	0.680074	0.251601	0.110913	1.24924
	z.25	0.918198	0.640083	-0.529771	2.36617	0.715916	0.518887	-0.457887	1.88972	0.67894	0.463474	-0.369512	1.72739	0.658048	0.392991	-0.23096	1.54706
	z.78	0.277051	0.507786	-0.87164	1.42574	0.578469	0.447383	-0.433581	1.59052	0.720023	0.231913	0.195399	1.24465	0.655787	0.415377	-0.283861	1.59543
	y.15	0.826757	0.566632	-0.455054	2.10857	0.717924	0.470599	-0.346644	1.78249	0.655952	0.313597	-0.0534537	1.36536	0.64646	0.477161	-0.432954	1.72587
	z.94	0.455229	0.455557	-0.575314	1.48577	0.456284	0.285413	-0.189365	1.10193	0.546962	0.370232	-0.29056	1.38448	0.644015	0.300253	-0.035205	1.32323
	z.98	0.435473	0.404251	-0.479006	1.34995	0.780797	0.198468	0.331831	1.22976	0.677807	0.199769	0.225899	1.12972	0.626544	0.195829	0.183549	1.06954
	z.7	0.310297	0.442071	-0.689737	1.31033	0.542708	0.262125	-0.0502606	1.13568	0.599814	0.342157	-0.174199	1.37383	0.603715	0.331164	-0.14543	1.35286
	z.39	0.229901	0.4308	-0.744636	1.20444	0.714074	0.290982	0.0558278	1.37232	0.644909	0.23024	0.124069	1.16575	0.594147	0.190104	0.164103	1.02419
	z.73	0.826321	0.332274	0.0746659	1.57798	0.679257	0.227771	0.164004	1.19451	0.587951	0.158968	0.22834	0.947563	0.591532	0.178262	0.188276	0.994789
	z.57	0.299073	0.37018	-0.538333	1.13648	0.433093	0.476323	-0.644425	1.51061	0.602155	0.197738	0.154841	1.04947	0.564108	0.258935	-0.0216426	1.14986
	z.21	0.787221	0.665673	-0.718636	2.29308	0.598244	0.50668	-0.547946	1.74443	0.528072	0.453356	-0.497492	1.55363	0.521374	0.44256	-0.479767	1.52251
	z.127	0.110806	0.499112	-1.01826	1.23988	0.496963	0.260938	-0.093321	1.08725	0.435096	0.305841	-0.256765	1.12696	0.494206	0.324334	-0.239488	1.2279
	z.17	0.316787	0.413448	-0.618497	1.25207	0.506825	0.455476	-0.523533	1.53718	0.438757	0.346108	-0.344194	1.22171	0.407323	0.299267	-0.269667	1.08431
	z.26	0.0157519	0.584813	-1.30719	1.33869	0.43596	0.270694	-0.176392	1.04831	0.393471	0.270966	-0.219497	1.00644	0.377654	0.303993	-0.310025	1.06533
	Model parameters:
	Variable	warmness	astringency	sourness	bitterness	clarity	color tonality	color intensity	overall-intensity
	Intercept	5.67641	3.94216	3.29427	5.85855	7.64831	2.71538	4.35811	7.30794
	y.3	5.86013e-08	6.57949e-07	-1.70935e-08	3.83736e-07	9.12091e-08	-3.97334e-07	-4.36234e-07	-3.05085e-07
	y.4	2.76609e-08	7.78773e-08	-1.81191e-08	6.93374e-08	-2.23953e-08	-4.42708e-08	-3.42833e-08	-3.86543e-08
	y.6	2.73609e-07	4.26627e-07	-5.78826e-07	9.85066e-07	-1.59154e-07	-6.43209e-07	-5.45847e-07	2.06498e-08
	y.7	-2.04009e-06	1.9026e-06	6.28975e-07	8.17749e-07	2.70992e-06	-6.37831e-07	-4.5286e-07	-6.03588e-07
	y.8	3.05683e-07	5.69001e-07	-2.58636e-07	3.93824e-07	1.24491e-07	-9.11147e-07	-1.33374e-06	-7.70326e-08
	y.10	3.74091e-08	1.82133e-08	-2.69567e-08	4.57279e-08	-4.83532e-08	-1.36647e-08	1.56823e-09	-1.06541e-08
	y.12	5.80275e-07	-2.5881e-07	1.53142e-07	-2.86784e-07	-1.12035e-06	7.30569e-07	1.0638e-06	-2.9049e-07
	y.13	-3.14612e-08	1.041e-07	4.88453e-08	-9.08127e-09	6.95504e-08	-4.43186e-08	-7.44719e-08	-5.68928e-08
	y.14	1.34247e-08	-5.80477e-09	-5.19519e-09	-1.53582e-09	-1.38656e-08	-3.32648e-09	-7.48338e-09	2.45688e-09
	y.15	1.03099e-06	-2.30344e-06	2.27584e-07	-9.74986e-07	-3.2236e-06	3.35912e-06	5.08607e-06	-7.50142e-09
	y.16	9.19876e-08	-4.61425e-07	-1.34007e-07	2.37332e-08	-3.92329e-07	4.18671e-07	7.06866e-07	1.67437e-07
	y.17	4.27045e-06	-4.72574e-06	-2.26014e-06	-1.20332e-06	-5.15008e-06	3.55077e-07	-5.035e-07	2.33976e-06
	y.18	6.48997e-07	-1.70974e-07	-4.03737e-07	4.78311e-07	-1.04344e-06	1.96057e-07	5.71291e-07	-3.30774e-08
	y.19	-5.59007e-07	3.83354e-07	-8.31707e-07	2.439e-06	-5.12486e-07	8.9455e-07	2.95869e-06	-1.67425e-07
	y.21	6.77274e-08	-2.73315e-08	-6.80534e-07	1.38222e-06	-7.05451e-07	4.22728e-07	1.50168e-06	3.91905e-08
	y.22	4.69794e-08	-1.48577e-08	-2.49644e-07	4.97532e-07	-2.85027e-07	1.57324e-07	5.4826e-07	1.03606e-08
	y.23	3.94645e-07	-2.32493e-07	-2.26777e-07	2.3252e-07	-7.30186e-07	2.87455e-07	5.98113e-07	1.00309e-09
	y.26	1.81237e-08	-6.20761e-09	-9.18542e-08	1.93225e-07	-1.22403e-07	7.91038e-08	2.44027e-07	-3.20087e-09
	y.27	1.65761e-07	-3.67547e-08	1.02309e-07	-3.86665e-08	-4.75531e-07	4.28147e-07	7.09607e-07	-1.98182e-07
	y.28	-1.21701e-07	3.24486e-07	-1.60682e-07	8.23483e-07	-3.33418e-07	4.19294e-07	1.21012e-06	-2.75793e-07
	y.29	1.49375e-07	6.04425e-07	2.65697e-07	1.89558e-07	-4.52122e-07	3.32278e-07	7.09288e-07	-6.22924e-07
	y.30	-2.71395e-08	8.2263e-07	4.77685e-07	4.39815e-07	-7.8281e-07	1.06689e-06	2.13904e-06	-1.023e-06
	y.31	-2.46682e-08	1.96211e-07	-8.58049e-10	2.79421e-07	-1.64675e-07	1.88943e-07	4.95547e-07	-1.85061e-07
	y.32	-1.92227e-08	2.94192e-07	1.73998e-07	1.6827e-07	-2.88477e-07	4.08061e-07	8.17347e-07	-3.73026e-07
	y.33	4.61156e-07	-2.60609e-07	-7.31987e-07	9.46095e-07	-8.15603e-07	2.38135e-08	5.38356e-07	2.27916e-07
	y.34	-5.76155e-08	4.16993e-07	1.33433e-07	4.07368e-07	-3.62461e-07	5.00639e-07	1.12006e-06	-4.62533e-07
	y.35	5.36466e-08	4.62363e-07	2.44075e-07	3.17323e-07	-6.01285e-07	6.89733e-07	1.39453e-06	-6.19025e-07
	y.36	-1.23275e-07	3.30325e-07	-3.74325e-08	7.5761e-07	-5.00772e-07	7.01151e-07	1.66077e-06	-4.09085e-07
	y.37	-2.09015e-07	4.20086e-07	-1.82996e-07	1.18735e-06	-5.89049e-07	8.3179e-07	2.1362e-06	-4.47788e-07
	y.38	-1.00045e-07	4.36401e-07	-1.29091e-07	8.65e-07	-3.7785e-07	4.29929e-07	1.25733e-06	-3.67206e-07
	Total polyphenols	-1.80266e-05	4.4932e-06	-1.43731e-05	2.6652e-05	2.55747e-05	-1.53629e-05	-1.06243e-05	1.14488e-05
	Lactic acid	0.0222434	-0.031759	-0.00526275	-0.0198493	-0.0287472	0.00995145	0.00335483	0.0122977
	Tartaric acid	-0.0012081	0.0201931	-0.00220555	0.0156816	0.00545127	-0.0120973	-0.0109097	-0.00807002
	Acetic acid	-0.17952	-0.0734362	-0.13901	0.337343	0.00607011	0.198124	0.534682	0.0698524
	z.1	-3.44108e-05	3.31533e-05	3.93132e-05	-1.51154e-05	2.63439e-05	2.95587e-05	4.58969e-05	-3.24777e-05
	z.2	2.51077e-06	-2.10906e-06	-2.67203e-08	-2.22991e-06	-2.90079e-06	5.86267e-07	-4.59079e-07	4.5563e-07
	z.3	-2.74571e-07	3.42183e-08	9.20771e-08	-4.29222e-08	3.34429e-07	1.955e-08	2.27136e-08	2.52433e-08
	z.4	-3.1357e-06	1.06852e-06	2.28501e-06	-2.03754e-06	4.14709e-06	3.05509e-07	-4.27524e-07	-5.1751e-07
	z.5	2.4462e-06	3.47837e-06	-5.25631e-07	1.85831e-06	-1.69237e-06	-2.71313e-06	-3.54648e-06	-1.90198e-06
	z.6	-9.93749e-07	1.98017e-06	9.83739e-07	5.12716e-07	7.94117e-07	4.36965e-07	1.19625e-06	-1.42047e-06
	z.7	-3.99737e-07	1.83595e-06	-1.96854e-07	2.1441e-06	-1.37015e-07	1.28956e-07	1.54674e-06	-1.07107e-06
	z.8	1.26278e-06	3.57813e-06	4.40571e-06	-7.98697e-06	4.15733e-06	-5.67042e-06	-1.41271e-05	-1.95806e-06
	z.9	-2.38373e-06	1.86568e-05	1.4182e-05	-1.13131e-05	9.77323e-06	-6.25707e-06	-1.59964e-05	-1.31921e-05
	z.10	-5.81941e-07	-8.05896e-08	1.08148e-06	-1.7621e-06	1.08318e-06	1.05706e-07	-7.86855e-07	-1.10259e-07
	z.11	-1.58764e-07	-4.84673e-08	-9.78965e-08	3.25404e-07	-7.34396e-08	2.84516e-07	6.77913e-07	6.85188e-09
	z.12	-1.73888e-06	-2.56202e-06	6.04559e-06	-8.50797e-06	-7.23256e-07	7.56979e-06	8.23564e-06	-2.06391e-06
	z.13	-1.88662e-06	2.4411e-06	5.32314e-06	-5.9024e-06	2.71573e-06	1.60334e-06	-3.23545e-07	-3.04416e-06
	z.14	-2.52639e-06	1.40695e-06	8.6657e-06	-1.01423e-05	1.52328e-06	6.21479e-06	5.23581e-06	-4.67299e-06
	z.15	1.41127e-06	1.65865e-06	5.05091e-06	-8.74417e-06	1.5007e-06	-1.61376e-06	-7.65565e-06	-2.31306e-06
	z.16	2.53416e-06	-8.67688e-07	1.91328e-07	-1.36505e-06	-3.36321e-06	9.09028e-07	6.54078e-07	-5.29624e-07
	z.17	-1.6197e-07	-9.72797e-06	-6.73016e-06	5.01345e-06	-3.00416e-06	3.03758e-06	7.51181e-06	7.18015e-06
	z.18	6.21539e-07	-2.97699e-06	1.39771e-05	-1.97006e-05	-5.77301e-06	1.50735e-05	1.48096e-05	-7.20209e-06
	z.19	-7.00295e-06	-3.97256e-06	-1.75495e-06	3.14011e-06	5.95785e-06	2.83739e-06	6.71967e-06	4.11923e-06
	z.20	-4.73687e-07	2.89462e-07	9.51299e-07	-8.78363e-07	2.73936e-07	7.96072e-07	9.18982e-07	-5.83144e-07
	z.21	-3.50768e-06	5.00007e-06	6.12369e-06	-4.25486e-06	3.8431e-06	2.2695e-06	1.96376e-06	-4.68895e-06
	z.22	-7.72622e-08	-2.29912e-07	-4.304e-07	5.48087e-07	3.75786e-09	-6.73101e-08	1.81006e-07	3.12407e-07
	z.23	-4.00587e-07	-1.539e-06	-3.48022e-06	2.13274e-06	3.50463e-06	-5.3697e-06	-8.15746e-06	3.90245e-06
	z.24	-2.49146e-07	1.36308e-07	5.80307e-06	-6.14176e-06	-3.1544e-06	7.57301e-06	9.66308e-06	-4.18717e-06
	z.25	-3.29502e-06	8.88318e-06	1.23637e-05	-1.17359e-05	5.13962e-06	2.70449e-06	-1.26656e-06	-9.12941e-06
	z.26	-1.0859e-06	-2.61869e-06	-2.43373e-06	2.54285e-06	4.41047e-07	4.10342e-07	2.02919e-06	2.54268e-06
	z.27	-8.56093e-07	-9.48068e-06	-7.15863e-06	4.49418e-06	1.20914e-07	-2.19832e-07	1.63212e-06	8.44989e-06
	z.28	1.46805e-06	-2.46933e-07	7.37927e-08	-1.40079e-06	-6.60027e-07	-1.20059e-06	-2.93409e-06	1.27131e-07
	z.29	-2.40588e-07	-5.54678e-06	-4.96994e-06	4.72878e-06	-1.77002e-06	1.38793e-06	4.74336e-06	4.5631e-06
	z.30	2.52799e-06	-1.60418e-06	-8.99016e-07	-1.45564e-06	-1.58862e-06	-1.73414e-06	-4.00745e-06	1.1527e-06
	z.31	-4.27761e-06	7.43098e-06	-5.25459e-06	1.63868e-05	2.00675e-06	-1.32698e-06	7.49507e-06	-1.71995e-06
	z.32	1.00426e-06	-1.57067e-06	-2.39754e-06	1.18795e-06	2.34384e-07	-2.66364e-06	-4.06819e-06	2.29715e-06
	z.33	7.06033e-06	-7.73524e-06	-5.21854e-06	-1.44428e-06	-5.93538e-06	-3.53533e-06	-7.64781e-06	5.63072e-06
	z.34	-1.1439e-05	7.94945e-06	-4.89747e-06	1.65968e-05	1.28825e-05	-4.58578e-06	2.29748e-06	1.02763e-06
	z.35	1.28869e-05	-7.48428e-06	-2.11933e-06	-1.15956e-05	-6.53232e-06	-9.64475e-06	-2.41217e-05	5.02809e-06
	z.36	-5.08104e-06	4.21782e-06	3.26168e-06	1.96637e-06	2.4847e-06	4.91622e-06	1.00465e-05	-3.84968e-06
	z.37	2.34065e-06	-5.4675e-06	2.25275e-06	-8.40346e-06	-2.10449e-06	2.05125e-06	-1.57504e-06	1.57074e-06
	z.38	2.94089e-06	1.08959e-05	1.00395e-06	-5.74184e-06	1.37864e-05	-2.4315e-05	-4.47437e-05	9.05733e-08
	z.39	-2.00634e-07	4.80588e-06	1.42937e-06	6.68336e-07	1.41796e-06	-2.06614e-06	-2.91315e-06	-2.75624e-06
	z.40	7.72178e-08	-3.57064e-06	-1.56929e-06	-2.69541e-07	-1.46445e-07	2.0599e-07	-2.75344e-09	2.66118e-06
	z.41	-1.7439e-06	1.09928e-06	-9.44805e-07	3.81439e-06	3.40569e-07	1.28103e-06	4.4868e-06	-3.92871e-07
	z.42	1.68317e-06	-1.6816e-06	2.54649e-07	-3.11958e-06	-3.92859e-07	-1.34695e-06	-4.24195e-06	1.00041e-06
	z.43	3.37157e-06	1.7242e-06	4.5022e-06	-7.35917e-06	-2.4196e-06	1.63702e-07	-3.88148e-06	-3.38011e-06
	z.44	1.58971e-06	1.05041e-05	6.15349e-06	-2.96647e-06	-2.20619e-07	-1.5796e-06	-3.85646e-06	-8.43949e-06
	z.45	8.9349e-06	-2.66182e-06	1.08884e-05	-2.20915e-05	-8.14942e-06	4.1017e-06	-5.8126e-06	-5.2163e-06
	z.46	6.32489e-06	5.90293e-07	1.55517e-05	-2.23143e-05	-1.04987e-05	1.25895e-05	9.02496e-06	-1.07535e-05
	z.47	-9.53852e-06	2.74454e-05	1.65164e-05	-5.1221e-06	1.62999e-05	-5.24493e-06	-9.98348e-06	-1.78331e-05
	z.48	3.50872e-06	-1.20482e-06	-5.18592e-07	-2.34992e-06	-2.21031e-06	-2.2815e-06	-5.47171e-06	6.92672e-07
	z.49	1.15168e-07	-3.53613e-08	-3.26732e-07	3.26116e-07	1.55053e-08	-3.60994e-07	-4.47725e-07	2.02219e-07
	z.50	1.2056e-05	1.47887e-05	1.98729e-06	-1.17095e-06	-5.56543e-06	-1.36646e-05	-2.39138e-05	-8.98746e-06
	z.51	1.38975e-06	-8.57648e-07	-5.95942e-07	-6.03727e-07	-9.16082e-07	-9.62875e-07	-2.10796e-06	6.48878e-07
	z.52	2.53308e-06	-6.25507e-07	6.16026e-07	-4.24669e-06	3.14508e-07	-3.58518e-06	-8.71664e-06	7.33541e-07
	z.53	6.57794e-06	2.3923e-06	7.28628e-07	-3.31457e-06	-4.464e-06	-4.23662e-06	-9.30956e-06	-2.20891e-06
	z.54	-7.9844e-08	-4.2339e-07	1.4365e-06	-2.62654e-06	4.16547e-07	5.1192e-07	-6.09378e-07	-2.67583e-07
	z.55	-4.23788e-06	-5.35025e-06	-7.95496e-06	1.44505e-05	-3.2018e-06	7.32996e-06	2.0639e-05	4.37189e-06
	z.56	7.86856e-08	-6.88902e-08	-3.00961e-07	3.83312e-07	-1.07589e-07	-1.27551e-07	-1.25869e-08	1.47774e-07
	z.57	-5.3627e-06	8.53037e-06	-1.07864e-06	1.00009e-05	5.26208e-06	-1.84313e-06	3.12767e-06	-3.08434e-06
	z.58	1.54857e-06	4.1477e-06	1.00338e-05	-1.30935e-05	-5.45648e-07	2.86315e-06	-2.21967e-06	-6.8627e-06
	z.59	7.73424e-07	1.56774e-06	7.60662e-07	1.32265e-07	-1.40462e-06	6.31002e-07	1.2236e-06	-1.66779e-06
	z.60	2.46379e-06	-1.5582e-06	3.15763e-06	-6.12007e-06	-3.46227e-06	2.99239e-06	1.55145e-06	-1.58003e-06
	z.61	-1.82627e-06	-3.92493e-06	-2.50913e-07	-1.8582e-06	1.949e-06	1.17226e-06	8.32607e-07	2.75222e-06
	z.62	2.3564e-06	3.44683e-07	5.99957e-07	-1.86987e-06	-1.89156e-06	-8.12113e-07	-2.52751e-06	-7.91102e-07
	z.63	-4.58719e-06	1.87787e-06	3.17953e-06	-1.13266e-06	3.98413e-06	2.9081e-06	4.68335e-06	-1.759e-06
	z.64	-3.27744e-06	1.04428e-06	-1.35874e-06	7.19495e-06	-1.46197e-06	5.59619e-06	1.39003e-05	-1.27642e-06
	z.65	9.49569e-08	1.09134e-06	8.8892e-07	-9.72441e-07	5.35034e-07	-6.29436e-07	-1.57473e-06	-7.655e-07
	z.66	6.74053e-06	7.42374e-06	1.14588e-05	-2.03979e-05	2.65344e-06	-8.92512e-06	-2.67139e-05	-6.85522e-06
	z.67	3.14552e-06	-1.85959e-06	1.65452e-06	-4.92615e-06	-3.32299e-06	1.06238e-06	-1.15963e-06	-5.11183e-07
	z.68	6.42327e-06	-4.07763e-06	-9.89651e-07	-3.96374e-06	-6.53592e-06	-5.11352e-07	-3.59884e-06	1.24562e-06
	z.69	-3.76533e-06	3.82269e-06	1.9816e-06	1.31619e-06	3.79978e-06	7.18126e-07	2.34984e-06	-2.18831e-06
	z.70	-1.10923e-06	-8.57397e-07	-1.46217e-06	2.17764e-06	8.0121e-07	3.23807e-08	1.27286e-06	1.2664e-06
	z.71	-1.23835e-06	-4.71763e-06	-7.94482e-06	1.24601e-05	-4.2978e-06	4.15591e-06	1.39519e-05	4.1756e-06
	z.72	7.08169e-06	-1.24249e-05	-7.70729e-06	3.27175e-06	-1.27125e-05	4.96523e-06	9.42129e-06	6.45208e-06
	z.73	5.12494e-06	4.75696e-07	1.0771e-06	-3.96618e-07	-9.45894e-06	4.96339e-06	8.17814e-06	-3.7806e-06
	z.74	4.90477e-06	-6.05316e-06	-1.82465e-07	-5.74282e-06	-5.41289e-06	1.29791e-06	-1.52149e-06	2.13281e-06
	z.75	-4.14784e-07	2.35361e-06	4.55825e-07	9.46024e-07	8.09959e-07	-8.31651e-07	-7.55426e-07	-1.25346e-06
	z.76	4.12967e-06	3.78652e-06	1.64441e-06	-4.52909e-06	7.67406e-07	-7.17081e-06	-1.48843e-05	-1.65653e-06
	z.77	-6.45202e-07	-2.19636e-07	4.27063e-09	2.99781e-07	3.23179e-07	5.9912e-07	1.21709e-06	1.23487e-07
	z.78	8.04808e-07	-3.76032e-06	3.08937e-06	-7.68425e-06	-7.30465e-07	2.54121e-06	-1.65225e-07	5.06686e-07
	z.79	-3.56618e-06	6.755e-06	1.66871e-05	-1.89017e-05	4.38076e-06	7.08482e-06	2.17472e-06	-1.03403e-05
	z.80	-1.11855e-06	-2.05589e-06	1.00014e-05	-1.49608e-05	-2.48808e-07	8.1293e-06	5.58748e-06	-3.84215e-06
	z.81	-4.9376e-06	-8.02575e-06	-1.13381e-05	1.67907e-05	-1.00693e-06	4.43554e-06	1.68234e-05	8.22852e-06
	z.82	-5.76744e-06	1.21097e-05	1.18722e-05	-6.25106e-06	5.44995e-06	4.74152e-06	5.6151e-06	-1.10797e-05
	z.83	-1.63554e-06	-4.3491e-07	1.3796e-06	-5.62905e-07	-1.09772e-07	3.42818e-06	5.65078e-06	-7.92133e-07
	z.84	3.44206e-07	1.1834e-06	5.30373e-07	-1.90207e-07	-1.41294e-07	-3.63063e-07	-6.80298e-07	-8.9082e-07
	z.85	-3.93082e-06	3.43667e-06	1.46788e-06	2.2117e-06	3.43276e-06	1.24786e-06	3.75232e-06	-1.93011e-06
	z.86	-3.55082e-06	2.2496e-06	2.77388e-06	6.21536e-07	9.96652e-07	4.84816e-06	9.00034e-06	-2.85321e-06
	z.87	-7.09714e-06	1.52111e-05	1.98185e-06	1.13573e-05	6.5043e-06	-1.05969e-06	5.69504e-06	-8.03765e-06
	z.88	-9.87586e-08	6.146e-06	-1.61033e-06	5.85856e-06	1.69043e-06	-4.64056e-06	-4.37929e-06	-1.95027e-06
	z.89	-5.75891e-08	-3.95634e-07	-5.48888e-07	7.41228e-07	-2.37585e-07	1.90657e-07	7.24955e-07	3.58793e-07
	z.90	6.22238e-06	2.24715e-06	7.67124e-06	-1.44899e-05	-2.69636e-06	-2.03379e-06	-1.17641e-05	-4.6567e-06
	z.91	-1.43795e-05	5.35885e-06	1.0076e-05	3.18039e-06	1.47913e-06	2.32914e-05	4.29284e-05	-1.00458e-05
	z.92	-1.96718e-06	6.1402e-06	8.19841e-06	-6.62128e-06	1.58051e-06	3.72199e-06	3.1505e-06	-6.93866e-06
	z.93	-3.30351e-06	1.67639e-06	3.44522e-06	-3.2817e-06	4.37063e-06	7.44471e-07	-3.25042e-07	-1.3313e-06
	z.94	-2.0101e-06	-1.59357e-06	-4.29141e-06	5.12813e-06	3.29593e-06	-3.18725e-06	-2.6434e-06	3.87791e-06
	z.95	1.69677e-06	-3.45705e-06	-7.0461e-07	-6.39382e-06	4.72509e-06	-7.89222e-06	-1.74943e-05	4.65212e-06
	z.96	3.02461e-06	-3.94793e-06	-1.398e-06	-7.71618e-08	-5.93809e-06	3.44025e-06	5.55556e-06	9.03264e-07
	z.97	-1.36979e-06	2.66824e-06	2.10346e-06	-7.98958e-07	1.63113e-06	3.57244e-07	3.77267e-07	-2.03801e-06
	z.98	-3.80364e-07	-1.43515e-07	7.04485e-09	1.62175e-07	1.86899e-07	3.643e-07	7.2773e-07	7.69126e-08
	z.99	-7.4323e-06	1.9627e-05	1.42413e-06	1.08713e-05	1.39014e-05	-1.15138e-05	-1.23813e-05	-7.0919e-06
	z.100	1.04051e-05	3.71687e-06	8.8727e-06	-1.57179e-05	-8.57532e-06	-4.43812e-07	-9.78844e-06	-7.69339e-06
	z.101	-3.37458e-06	5.06552e-06	3.00798e-06	-1.29762e-09	4.24468e-06	-1.95986e-07	8.62896e-08	-3.0781e-06
	z.102	4.198e-07	5.44815e-06	1.37621e-06	4.9481e-07	1.51967e-06	-3.31494e-06	-5.15722e-06	-2.91249e-06
	z.103	1.75092e-07	-1.03741e-06	-2.15792e-07	-1.30514e-06	1.03225e-06	-1.39254e-06	-3.20553e-06	1.16014e-06
	z.104	-1.04722e-06	1.85886e-06	3.79055e-06	-3.88876e-06	1.11924e-06	1.70719e-06	9.18304e-07	-2.52514e-06
	z.105	-9.13797e-07	-7.50717e-08	2.69397e-07	2.63001e-07	3.73222e-07	1.03618e-06	1.971e-06	-1.14773e-07
	z.106	-1.5408e-06	-4.54379e-06	9.39452e-07	-2.88283e-06	-3.05235e-07	4.45468e-06	5.88473e-06	1.62642e-06
	z.107	-2.87109e-06	-7.60585e-06	-3.75656e-06	2.55983e-06	7.14312e-07	3.34914e-06	6.90459e-06	5.66329e-06
	z.108	9.83505e-06	3.55866e-07	-1.68471e-06	-5.2843e-06	-3.52449e-06	-1.09694e-05	-2.22996e-05	1.13626e-06
	z.109	6.33433e-06	-1.11118e-06	-1.56811e-06	-1.85167e-06	-5.01666e-06	-3.47169e-06	-7.35771e-06	5.08352e-07
	z.110	1.43171e-06	7.57497e-06	5.57864e-06	-5.86683e-06	2.47e-06	-4.25318e-06	-1.0266e-05	-5.4149e-06
	z.111	-5.27677e-06	1.6868e-06	1.59715e-06	6.00069e-08	6.61153e-06	-2.46042e-07	-8.29271e-08	7.41692e-08
	z.112	4.61673e-06	-3.24739e-07	-3.01246e-07	-1.1427e-06	-5.3179e-06	-8.94345e-08	-9.99678e-07	-1.00935e-06
	z.113	-1.2775e-06	2.40234e-06	4.1989e-06	-3.7498e-06	9.62341e-07	2.3178e-06	2.09208e-06	-3.13272e-06
	z.114	2.80737e-07	-2.74881e-07	-1.19374e-06	1.80609e-06	-8.10756e-07	2.7528e-08	1.03357e-06	4.13897e-07
	z.115	1.06798e-06	3.45478e-06	3.07486e-06	-4.17552e-06	1.54561e-06	-2.78208e-06	-6.99593e-06	-2.44615e-06
	z.116	1.81699e-06	3.23698e-06	2.00415e-06	-3.30615e-06	1.19276e-06	-3.96817e-06	-8.60107e-06	-1.82335e-06
	z.117	1.46911e-07	2.725e-07	-3.399e-06	4.96812e-06	1.61659e-07	-2.39847e-06	-1.34954e-06	1.52626e-06
	z.118	-2.13461e-06	-1.49084e-06	-2.33779e-06	5.40157e-06	-1.18004e-06	3.73591e-06	9.4877e-06	9.47825e-07
	z.119	-4.18163e-07	6.79357e-06	5.01984e-06	-4.1698e-06	3.24064e-06	-2.61408e-06	-6.45136e-06	-4.77952e-06
	z.120	-1.45736e-05	3.53916e-05	4.52657e-05	-3.07306e-05	7.47681e-06	2.71473e-05	3.23012e-05	-4.04639e-05
	z.121	4.79148e-06	-1.5234e-05	-2.25393e-05	1.32317e-05	5.97889e-06	-2.2891e-05	-3.32112e-05	2.25086e-05
	z.122	-7.97128e-07	-1.80365e-06	6.15074e-06	-5.27261e-06	-6.51715e-06	1.33842e-05	2.01063e-05	-4.84636e-06
	z.123	-1.14006e-06	-2.5014e-06	-4.14149e-06	5.39125e-06	1.7176e-07	-1.57254e-07	2.65463e-06	3.14135e-06
	z.124	2.53141e-06	-6.16782e-07	1.55031e-06	-3.87831e-06	-2.32244e-06	2.82041e-07	-1.82487e-06	-8.48306e-07
	z.125	3.24905e-06	1.83628e-06	1.30052e-06	-1.64181e-06	-3.58079e-06	-6.68314e-09	-9.57835e-07	-2.48697e-06
	z.126	2.33741e-06	4.95689e-06	4.76652e-06	-5.96038e-06	9.31327e-08	-2.27711e-06	-7.08916e-06	-4.42508e-06
	z.127	-6.95812e-09	-1.9735e-06	-1.1728e-06	1.2093e-07	2.73836e-07	-4.34337e-07	-7.95694e-07	1.75582e-06
	z.128	-6.084e-06	-2.21773e-06	1.16265e-05	-9.15528e-06	-4.93053e-06	2.22908e-05	3.35125e-05	-7.58645e-06
	z.129	6.41213e-06	-3.63159e-06	2.50773e-06	-8.77302e-06	-6.58082e-06	1.39186e-06	-2.98058e-06	-6.45485e-07
	z.130	3.37285e-07	-1.4841e-07	5.57406e-08	-2.56943e-07	-4.37938e-07	1.34954e-07	6.70972e-08	-6.20657e-08
	z.131	3.49231e-06	-3.00465e-06	-1.33522e-07	-3.56886e-06	-3.1908e-06	-2.88817e-07	-2.81344e-06	1.08383e-06
	z.132	2.51417e-06	1.9254e-06	3.57956e-06	-3.7307e-06	-4.25332e-06	3.1716e-06	3.39889e-06	-4.04035e-06
	z.133	-3.36474e-06	7.9467e-08	2.88761e-07	1.02802e-06	3.2518e-06	9.39828e-07	2.34091e-06	5.20186e-07
	z.134	4.09957e-06	5.13141e-08	6.72063e-08	-3.81464e-06	-8.60586e-07	-4.88639e-06	-1.07477e-05	4.34492e-07
	z.135	9.81418e-06	-8.45379e-06	-5.58094e-06	-2.08026e-06	-9.34726e-06	-3.23811e-06	-7.64263e-06	5.30053e-06
	z.136	5.08408e-06	4.0807e-06	1.17099e-05	-1.46908e-05	-7.59441e-06	7.58487e-06	4.90011e-06	-9.91123e-06
	z.137	1.35675e-06	4.86176e-06	4.60229e-06	-5.97327e-06	1.93915e-06	-3.24798e-06	-8.74061e-06	-3.70318e-06
	z.138	-1.54038e-06	-4.18808e-06	-7.0731e-06	7.32116e-06	2.59126e-06	-3.80231e-06	-2.64399e-06	6.40086e-06
	z.139	-2.44835e-07	7.27757e-06	1.17948e-05	-1.38159e-05	2.92175e-06	1.18919e-06	-5.26696e-06	-8.29142e-06
	z.140	4.02105e-06	-3.52368e-06	1.89032e-06	-6.13362e-06	-5.25899e-06	2.83946e-06	1.10432e-06	-3.51714e-07
	z.141	-8.75159e-07	-7.23197e-06	2.6929e-07	-1.9686e-06	-4.21916e-06	8.83099e-06	1.37813e-05	1.87204e-06
	z.142	9.16176e-08	-6.31728e-08	-6.36084e-07	6.72895e-07	1.90394e-07	-7.13506e-07	-8.63192e-07	4.31955e-07
	z.143	-1.91483e-07	4.26958e-06	1.32289e-05	-1.28598e-05	-5.144e-06	1.29954e-05	1.55022e-05	-1.0774e-05
	z.144	1.14744e-06	-4.22305e-08	-2.23032e-06	5.80082e-06	-5.65811e-06	4.26147e-06	1.05711e-05	-1.15293e-06
	z.145	-1.9476e-06	3.53018e-06	3.8433e-06	-2.90874e-06	2.80086e-06	4.48485e-07	-5.75781e-07	-2.93799e-06
	z.146	2.45856e-06	-6.87281e-06	-8.31388e-06	4.95941e-06	-4.00869e-07	-5.79466e-06	-7.72699e-06	8.01403e-06
	z.147	-8.22311e-06	7.39814e-06	2.74928e-06	1.9083e-06	1.22442e-05	-4.05027e-06	-5.17635e-06	-1.80912e-06
	z.148	5.66677e-06	1.64756e-07	9.58371e-06	-1.48594e-05	-7.83418e-06	6.95561e-06	3.47009e-06	-6.73382e-06
	z.149	5.70327e-06	-5.26466e-07	-3.33903e-07	-2.538e-06	-5.08953e-06	-1.93072e-06	-5.02022e-06	-5.53432e-07
	z.150	-2.50578e-06	-1.30371e-06	-9.12462e-06	1.46251e-05	8.61491e-07	-2.15937e-06	4.49663e-06	4.79802e-06
	z.151	3.40988e-07	1.42958e-06	9.46162e-07	-1.11745e-06	6.07568e-07	-1.14534e-06	-2.53832e-06	-8.96162e-07
	z.152	8.79644e-06	-7.69032e-06	-3.22275e-06	-5.68951e-06	-6.70088e-06	-4.0021e-06	-1.0903e-05	4.71564e-06
	z.153	-1.51561e-06	5.08935e-06	8.71606e-06	-1.14422e-05	5.83344e-06	-1.74629e-06	-9.08388e-06	-4.6562e-06
	z.154	6.16764e-06	-3.09231e-06	6.77642e-06	-1.28261e-05	-9.02154e-06	7.08048e-06	4.61968e-06	-4.0342e-06
	z.155	-4.89621e-06	1.22787e-05	6.21725e-06	-6.11371e-07	8.37746e-06	-3.45792e-06	-5.41989e-06	-7.09733e-06
	z.156	-2.74273e-06	2.26289e-06	2.08718e-06	-3.90473e-07	2.79121e-06	1.0012e-06	1.75145e-06	-1.59305e-06
	Equation of the model:
	warmness = 5.67641415657402+5.86013436233151E-08*y.3+2.76608693286393E-08*y.4+2.736085764381E-07*y.6-2.04009103929583E-06*y.7+3.05683195104381E-07*y.8+3.74091078842201E-08*y.10+5.80275063375558E-07*y.12-3.14611982796643E-08*y.13+1.34246775539822E-08*y.14+1.030991048889E-06*y.15+9.1987567627921E-08*y.16+4.27045113303586E-06*y.17+6.48996772051178E-07*y.18-5.59007276264457E-07*y.19+6.77274329639227E…
	astringency = 3.94215925289665+6.57949217711079E-07*y.3+7.78773258539303E-08*y.4+4.26627449573911E-07*y.6+1.90260099545571E-06*y.7+5.69000667766202E-07*y.8+1.82132812753223E-08*y.10-2.588100079279E-07*y.12+1.04099743792238E-07*y.13-5.80477368891803E-09*y.14-2.30343976186025E-06*y.15-4.61425034751461E-07*y.16-4.72573501939744E-06*y.17-1.70974068250375E-07*y.18+3.83353593345944E-07*y.19-2.733151336…
	sourness = 3.29427064418227-1.70934655190967E-08*y.3-1.81191003161981E-08*y.4-5.7882626309135E-07*y.6+6.28975333508481E-07*y.7-2.58635673853239E-07*y.8-2.69567271042202E-08*y.10+1.53141895428306E-07*y.12+4.88453075526371E-08*y.13-5.19519165309269E-09*y.14+2.27584357143914E-07*y.15-1.34006663457765E-07*y.16-2.26013829578873E-06*y.17-4.03737099571293E-07*y.18-8.31707181763017E-07*y.19-6.80534013150…
	bitterness = 5.85854622929999+3.83736390255097E-07*y.3+6.93373545585257E-08*y.4+9.8506612414175E-07*y.6+8.17749275481351E-07*y.7+3.93824052197859E-07*y.8+4.57278705775765E-08*y.10-2.86783843771387E-07*y.12-9.0812709281947E-09*y.13-1.53582047307433E-09*y.14-9.74986260649167E-07*y.15+2.37331947138657E-08*y.16-1.20331943910945E-06*y.17+4.78310601322885E-07*y.18+2.43900102446933E-06*y.19+1.3822171704…
	clarity = 7.64830718753685+9.12091453368703E-08*y.3-2.23952977448216E-08*y.4-1.5915354405545E-07*y.6+2.70991878611888E-06*y.7+1.24490542744719E-07*y.8-4.83532061615511E-08*y.10-1.12035360272642E-06*y.12+6.9550407238743E-08*y.13-1.38656390442584E-08*y.14-3.22359956894699E-06*y.15-3.92328792624858E-07*y.16-5.1500826395251E-06*y.17-1.04343899006494E-06*y.18-5.12485693389416E-07*y.19-7.05450725805936…
	color tonality = 2.71537824767349-3.97333500992081E-07*y.3-4.42707653903445E-08*y.4-6.43209491378327E-07*y.6-6.37830893965548E-07*y.7-9.11147362412818E-07*y.8-1.36647420196936E-08*y.10+7.30568951454351E-07*y.12-4.43185694790925E-08*y.13-3.32647618866524E-09*y.14+3.35912021589904E-06*y.15+4.1867098689173E-07*y.16+3.55077295031841E-07*y.17+1.9605718068608E-07*y.18+8.94549587241649E-07*y.19+4.227283…
	color intensity = 4.35811443697867-4.36233606454569E-07*y.3-3.42832606045502E-08*y.4-5.45847037390926E-07*y.6-4.52860380712704E-07*y.7-1.33373983381522E-06*y.8+1.56823447952707E-09*y.10+1.06380301738482E-06*y.12-7.447191728007E-08*y.13-7.48337837983372E-09*y.14+5.08607415435604E-06*y.15+7.06866240163175E-07*y.16-5.03499842796415E-07*y.17+5.71291225203893E-07*y.18+2.95868807940646E-06*y.19+1.50168…
	overall-intensity = 7.30793524664987-3.05085363625524E-07*y.3-3.86542917440567E-08*y.4+2.06497945718515E-08*y.6-6.0358756722728E-07*y.7-7.70326192271881E-08*y.8-1.0654077831882E-08*y.10-2.90489701304681E-07*y.12-5.68928421097961E-08*y.13+2.45687806349304E-09*y.14-7.50141868994339E-09*y.15+1.67436606194603E-07*y.16+2.33975631839028E-06*y.17-3.30773718044712E-08*y.18-1.67424988220624E-07*y.19+3.919…
	Results for variable warmness:
	Goodness of fit statistics (Variable warmness):
	Observations	10
	Sum of weights	10
	DF	5
	R²	0.718774
	Std. deviation	0.363808
	MSE	0.0661782
	RMSE	0.257251
	VIDs (Variable warmness):
	Variable	VID	Std. deviation	Lower bound (95%)	Upper bound (95%)
	y.3	0.426769	0.270377	-0.184867	1.03841
	y.4	0.604853	0.236674	0.0694588	1.14025
	y.6	0.55261	0.154408	0.203314	0.901907
	y.7	-0.713662	0.163872	-1.08437	-0.342957
	y.8	0.440407	0.199062	-0.00990261	0.890716
	y.10	0.741791	0.20122	0.286599	1.19698
	y.12	0.741999	0.188645	0.315255	1.16874
	y.13	-0.423637	0.324095	-1.15679	0.309517
	y.14	0.933683	0.103137	0.70037	1.167
	y.15	0.321178	0.25043	-0.245335	0.88769
	y.16	0.350321	0.281732	-0.287002	0.987644
	y.17	0.894168	0.183372	0.479351	1.30898
	y.18	0.833752	0.175861	0.435926	1.23158
	y.19	0.379719	0.318176	-0.340045	1.09948
	y.21	0.627974	0.269525	0.0182667	1.23768
	y.22	0.616799	0.267503	0.0116653	1.22193
	y.23	0.791228	0.203698	0.33043	1.25203
	y.26	0.621651	0.263411	0.025773	1.21753
	y.27	0.666715	0.231598	0.142804	1.19063
	y.28	0.471264	0.311238	-0.232806	1.17533
	y.29	0.642304	0.276168	0.0175677	1.26704
	y.30	0.532859	0.312706	-0.174533	1.24025
	y.31	0.530168	0.305405	-0.160705	1.22104
	y.32	0.516875	0.315656	-0.197188	1.23094
	y.33	0.777027	0.197566	0.330102	1.22395
	y.34	0.503648	0.317259	-0.214042	1.22134
	y.35	0.579872	0.299447	-0.0975244	1.25727
	y.36	0.475876	0.315244	-0.237256	1.18901
	y.37	0.445345	0.318317	-0.274739	1.16543
	y.38	0.522579	0.304808	-0.166944	1.2121
	Total polyphenols	-0.740653	0.128242	-1.03076	-0.45055
	Lactic acid	0.646201	0.243236	0.0959618	1.19644
	Tartaric acid	0.339677	0.265514	-0.260956	0.94031
	Acetic acid	-0.388832	0.30971	-1.08944	0.311781
	z.1	-0.734067	0.19428	-1.17356	-0.294575
	z.2	0.84004	0.166593	0.463179	1.2169
	z.3	-0.873128	0.0995405	-1.0983	-0.647952
	z.4	-0.87404	0.120942	-1.14763	-0.60045
	z.5	0.677991	0.189387	0.249568	1.10641
	z.6	-0.146675	0.248121	-0.707963	0.414612
	z.7	0.122459	0.207566	-0.347088	0.592006
	z.8	-0.495036	0.260149	-1.08353	0.0934627
	z.9	-0.348894	0.347574	-1.13516	0.437372
	z.10	-0.69553	0.196557	-1.14017	-0.250888
	z.11	-0.00912097	0.292063	-0.669814	0.651572
	z.12	-0.456979	0.203731	-0.917852	0.00389292
	z.13	-0.738814	0.226912	-1.25212	-0.225505
	z.14	-0.625326	0.221084	-1.12545	-0.125199
	z.15	-0.398902	0.207026	-0.867227	0.0694237
	z.16	0.894407	0.138765	0.580499	1.20832
	z.17	-0.196905	0.184878	-0.615128	0.221318
	z.18	-0.177441	0.253439	-0.75076	0.395879
	z.19	-0.640591	0.181086	-1.05024	-0.230946
	z.20	-0.571018	0.165546	-0.94551	-0.196526
	z.21	-0.404431	0.182712	-0.817755	0.00889349
	z.22	-0.0565665	0.271441	-0.670608	0.557475
	z.23	-0.444347	0.188465	-0.870684	-0.0180089
	z.24	0.144475	0.2529	-0.427625	0.716575
	z.25	-0.339981	0.223158	-0.844798	0.164837
	z.26	-0.206424	0.223299	-0.711563	0.298714
	z.27	-0.304961	0.248133	-0.866276	0.256354
	z.28	0.770801	0.186257	0.34946	1.19214
	z.29	0.0611269	0.341014	-0.710299	0.832553
	z.30	0.920625	0.167296	0.542175	1.29908
	z.31	0.224594	0.306396	-0.468523	0.91771
	z.32	0.106548	0.285214	-0.538651	0.751746
	z.33	0.741191	0.253198	0.168416	1.31397
	z.34	-0.834679	0.179333	-1.24036	-0.428999
	z.35	0.709197	0.131573	0.411558	1.00684
	z.36	-0.502386	0.171463	-0.890262	-0.11451
	z.37	-0.166702	0.260026	-0.754922	0.421519
	z.38	-0.188726	0.256871	-0.76981	0.392358
	z.39	0.027477	0.247476	-0.532352	0.587306
	z.40	-0.321139	0.325435	-1.05732	0.415047
	z.41	-0.1088	0.306643	-0.802475	0.584875
	z.42	-0.00947444	0.373332	-0.85401	0.835061
	z.43	0.50473	0.226163	-0.00688534	1.01635
	z.44	0.342151	0.266167	-0.259961	0.944263
	z.45	0.588721	0.231809	0.0643313	1.11311
	z.46	0.540743	0.268247	-0.0660734	1.14756
	z.47	-0.400944	0.317976	-1.12026	0.318368
	z.48	0.866167	0.0618543	0.726243	1.00609
	z.49	0.497023	0.155309	0.145689	0.848357
	z.50	0.598785	0.214275	0.114061	1.08351
	z.51	0.70666	0.123601	0.427056	0.986264
	z.52	0.104591	0.267058	-0.499537	0.708718
	z.53	0.705425	0.183753	0.289746	1.1211
	z.54	-0.53035	0.273688	-1.14947	0.0887754
	z.55	0.0414146	0.28847	-0.611149	0.693978
	z.56	0.479866	0.16532	0.105887	0.853845
	z.57	0.00119244	0.1625	-0.366407	0.368792
	z.58	0.0242121	0.317197	-0.693338	0.741762
	z.59	0.551637	0.221626	0.0502841	1.05299
	z.60	0.56849	0.232989	0.0414322	1.09555
	z.61	-0.520553	0.173306	-0.912598	-0.128508
	z.62	0.816696	0.127339	0.528636	1.10476
	z.63	-0.882004	0.129631	-1.17525	-0.588759
	z.64	0.0816488	0.338987	-0.685194	0.848491
	z.65	-0.215089	0.332924	-0.968216	0.538038
	z.66	-0.16556	0.265461	-0.766073	0.434954
	z.67	0.814468	0.188307	0.388489	1.24045
	z.68	0.850158	0.110378	0.600467	1.09985
	z.69	-0.918501	0.178992	-1.32341	-0.513593
	z.70	-0.536594	0.185561	-0.956362	-0.116825
	z.71	0.349623	0.225004	-0.159372	0.858618
	z.72	0.698879	0.226636	0.186194	1.21156
	z.73	0.624807	0.145453	0.295769	0.953845
	z.74	0.646684	0.283436	0.00550683	1.28786
	z.75	0.0859834	0.261151	-0.504782	0.676749
	z.76	0.405101	0.271276	-0.208568	1.01877
	z.77	-0.667956	0.195017	-1.10911	-0.226796
	z.78	-0.230213	0.209487	-0.704106	0.24368
	z.79	-0.643612	0.234045	-1.17306	-0.114166
	z.80	-0.504336	0.217066	-0.995372	-0.0132989
	z.81	-0.19373	0.309626	-0.894153	0.506693
	z.82	-0.433438	0.259791	-1.02113	0.15425
	z.83	-0.460329	0.22047	-0.959066	0.0384077
	z.84	0.554586	0.254744	-0.0216851	1.13086
	z.85	-0.946673	0.166321	-1.32292	-0.570428
	z.86	-0.616722	0.269879	-1.22723	-0.00621287
	z.87	-0.0747467	0.301171	-0.756043	0.60655
	z.88	0.348143	0.184999	-0.0703544	0.76664
	z.89	0.335675	0.306198	-0.356993	1.02834
	z.90	0.520997	0.259218	-0.0653953	1.10739
	z.91	-0.543934	0.176491	-0.943186	-0.144683
	z.92	-0.402293	0.313095	-1.11056	0.305977
	z.93	-0.857898	0.133983	-1.16099	-0.554807
	z.94	-0.509478	0.173513	-0.901992	-0.116963
	z.95	-0.58918	0.252461	-1.16029	-0.0180726
	z.96	0.749543	0.211277	0.271602	1.22748
	z.97	-0.680888	0.294564	-1.34724	-0.0145378
	z.98	-0.588985	0.118799	-0.857726	-0.320243
	z.99	-0.175154	0.237552	-0.712534	0.362227
	z.100	0.798491	0.180759	0.389586	1.2074
	z.101	-0.75302	0.245184	-1.30767	-0.198374
	z.102	0.268363	0.309976	-0.432852	0.969579
	z.103	-0.610578	0.173552	-1.00318	-0.217975
	z.104	-0.586931	0.226684	-1.09973	-0.0741359
	z.105	-0.675901	0.116695	-0.939885	-0.411918
	z.106	-0.479761	0.232424	-1.00554	0.046019
	z.107	-0.36597	0.241598	-0.912503	0.180562
	z.108	0.587405	0.18339	0.172548	1.00226
	z.109	0.916062	0.0855963	0.722429	1.10969
	z.110	-0.0238254	0.334343	-0.780162	0.732511
	z.111	-0.845627	0.126943	-1.13279	-0.558463
	z.112	0.662355	0.0681009	0.5083	0.81641
	z.113	-0.549788	0.259083	-1.13588	0.0362995
	z.114	0.649483	0.245661	0.0937605	1.20521
	z.115	-0.114357	0.31193	-0.819992	0.591278
	z.116	0.168443	0.258002	-0.415197	0.752083
	z.117	0.321824	0.212561	-0.159022	0.802669
	z.118	-0.0447929	0.259133	-0.630993	0.541408
	z.119	-0.169537	0.354225	-0.97085	0.631775
	z.120	-0.139251	0.193755	-0.577556	0.299054
	z.121	-0.162252	0.212625	-0.643242	0.318739
	z.122	0.0569895	0.200845	-0.397353	0.511332
	z.123	-0.11159	0.316753	-0.828135	0.604955
	z.124	0.773826	0.17067	0.387744	1.15991
	z.125	0.804333	0.133138	0.503155	1.10551
	z.126	0.303745	0.278303	-0.325821	0.933311
	z.127	-0.0841568	0.227194	-0.598105	0.429791
	z.128	-0.197413	0.217495	-0.68942	0.294595
	z.129	0.739273	0.14692	0.406916	1.07163
	z.130	0.865385	0.121011	0.591639	1.13913
	z.131	0.825456	0.16802	0.445369	1.20554
	z.132	0.728165	0.208453	0.256613	1.19972
	z.133	-0.848981	0.129239	-1.14134	-0.556623
	z.134	0.261264	0.220628	-0.237831	0.76036
	z.135	0.866092	0.164832	0.493215	1.23897
	z.136	0.590885	0.267857	-0.0150489	1.19682
	z.137	-0.0572939	0.330933	-0.805917	0.691329
	z.138	-0.337278	0.195284	-0.77904	0.104485
	z.139	-0.367991	0.258697	-0.953205	0.217222
	z.140	0.767683	0.199698	0.315935	1.21943
	z.141	-0.0588547	0.251141	-0.626974	0.509265
	z.142	-0.0604251	0.18837	-0.486548	0.365698
	z.143	0.107115	0.26075	-0.482743	0.696972
	z.144	0.540991	0.218056	0.047714	1.03427
	z.145	-0.779352	0.235462	-1.312	-0.2467
	z.146	0.126515	0.348135	-0.661021	0.91405
	z.147	-0.729265	0.187804	-1.15411	-0.304423
	z.148	0.682807	0.234108	0.153219	1.2124
	z.149	0.908576	0.0841615	0.718189	1.09896
	z.150	0.154249	0.318291	-0.565776	0.874273
	z.151	-0.0616981	0.31145	-0.766247	0.642851
	z.152	0.885395	0.188319	0.459389	1.3114
	z.153	-0.462117	0.183146	-0.876422	-0.0478113
	z.154	0.698273	0.209096	0.225265	1.17128
	z.155	-0.481697	0.252485	-1.05286	0.0894651
	z.156	-0.787547	0.160371	-1.15033	-0.424762
	Coefficients (Variable warmness):
	Variable	Coefficient	Std. deviation	Lower bound (95%)	Upper bound (95%)
	Intercept	5.67641	0.632174	4.24634	7.10649
	y.3	5.86013e-08	2.91249e-07	-6.0025e-07	7.17453e-07
	y.4	2.76609e-08	3.68483e-08	-5.56958e-08	1.11018e-07
	y.6	2.73609e-07	3.79936e-07	-5.85866e-07	1.13308e-06
	y.7	-2.04009e-06	9.80212e-07	-4.25749e-06	1.77303e-07
	y.8	3.05683e-07	3.59423e-07	-5.07389e-07	1.11876e-06
	y.10	3.74091e-08	2.54181e-08	-2.00906e-08	9.49088e-08
	y.12	5.80275e-07	5.22551e-07	-6.01818e-07	1.76237e-06
	y.13	-3.14612e-08	3.55767e-08	-1.11941e-07	4.90189e-08
	y.14	1.34247e-08	3.72574e-09	4.99647e-09	2.18529e-08
	y.15	1.03099e-06	3.79638e-06	-7.55702e-06	9.619e-06
	y.16	9.19876e-08	1.65105e-07	-2.81506e-07	4.65481e-07
	y.17	4.27045e-06	1.86935e-06	4.16779e-08	8.49922e-06
	y.18	6.48997e-07	3.31399e-07	-1.00679e-07	1.39867e-06
	y.19	-5.59007e-07	9.47346e-07	-2.70205e-06	1.58404e-06
	y.21	6.77274e-08	5.90839e-07	-1.26884e-06	1.4043e-06
	y.22	4.69794e-08	2.03376e-07	-4.13088e-07	5.07047e-07
	y.23	3.94645e-07	2.2394e-07	-1.11942e-07	9.01232e-07
	y.26	1.81237e-08	8.32391e-08	-1.70176e-07	2.06424e-07
	y.27	1.65761e-07	2.4065e-07	-3.78628e-07	7.10149e-07
	y.28	-1.21701e-07	4.92352e-07	-1.23548e-06	9.92075e-07
	y.29	1.49375e-07	4.97809e-07	-9.76747e-07	1.2755e-06
	y.30	-2.71395e-08	1.09649e-06	-2.50758e-06	2.4533e-06
	y.31	-2.46682e-08	2.27662e-07	-5.39676e-07	4.9034e-07
	y.32	-1.92227e-08	3.90392e-07	-9.0235e-07	8.63905e-07
	y.33	4.61156e-07	3.86751e-07	-4.13735e-07	1.33605e-06
	y.34	-5.76155e-08	5.2131e-07	-1.2369e-06	1.12167e-06
	y.35	5.36466e-08	6.59574e-07	-1.43841e-06	1.54571e-06
	y.36	-1.23275e-07	6.63702e-07	-1.62467e-06	1.37812e-06
	y.37	-2.09015e-07	8.53479e-07	-2.13972e-06	1.72169e-06
	y.38	-1.00045e-07	5.42615e-07	-1.32753e-06	1.12744e-06
	Total polyphenols	-1.80266e-05	1.17695e-05	-4.46512e-05	8.59796e-06
	Lactic acid	0.0222434	0.0128507	-0.00682693	0.0513137
	Tartaric acid	-0.0012081	0.00695947	-0.0169515	0.0145353
	Acetic acid	-0.17952	0.114012	-0.437434	0.078394
	z.1	-3.44108e-05	2.25427e-05	-8.5406e-05	1.65844e-05
	z.2	2.51077e-06	1.02863e-06	1.83858e-07	4.83768e-06
	z.3	-2.74571e-07	9.71154e-08	-4.94262e-07	-5.48808e-08
	z.4	-3.1357e-06	1.50579e-06	-6.54203e-06	2.7064e-07
	z.5	2.4462e-06	1.47237e-06	-8.84534e-07	5.77694e-06
	z.6	-9.93749e-07	9.27305e-07	-3.09146e-06	1.10396e-06
	z.7	-3.99737e-07	1.23959e-06	-3.20389e-06	2.40441e-06
	z.8	1.26278e-06	4.46439e-06	-8.83637e-06	1.13619e-05
	z.9	-2.38373e-06	7.02605e-06	-1.82778e-05	1.35103e-05
	z.10	-5.81941e-07	7.55627e-07	-2.29129e-06	1.12741e-06
	z.11	-1.58764e-07	1.58553e-07	-5.17435e-07	1.99907e-07
	z.12	-1.73888e-06	4.03633e-06	-1.08697e-05	7.39194e-06
	z.13	-1.88662e-06	2.35257e-06	-7.20851e-06	3.43526e-06
	z.14	-2.52639e-06	4.65333e-06	-1.30529e-05	8.00016e-06
	z.15	1.41127e-06	2.69481e-06	-4.68481e-06	7.50735e-06
	z.16	2.53416e-06	8.56846e-07	5.95839e-07	4.47248e-06
	z.17	-1.6197e-07	7.89389e-06	-1.80192e-05	1.76953e-05
	z.18	6.21539e-07	9.23416e-06	-2.02676e-05	2.15107e-05
	z.19	-7.00295e-06	4.75474e-06	-1.77589e-05	3.75301e-06
	z.20	-4.73687e-07	6.74928e-07	-2.00048e-06	1.05311e-06
	z.21	-3.50768e-06	5.60286e-06	-1.61822e-05	9.16686e-06
	z.22	-7.72622e-08	2.77939e-07	-7.06003e-07	5.51479e-07
	z.23	-4.00587e-07	3.96996e-06	-9.38126e-06	8.58008e-06
	z.24	-2.49146e-07	5.78207e-06	-1.33291e-05	1.28308e-05
	z.25	-3.29502e-06	7.52143e-06	-2.03097e-05	1.37196e-05
	z.26	-1.0859e-06	3.77719e-06	-9.63051e-06	7.4587e-06
	z.27	-8.56093e-07	4.72229e-06	-1.15387e-05	9.82647e-06
	z.28	1.46805e-06	8.79847e-07	-5.22299e-07	3.45841e-06
	z.29	-2.40588e-07	2.20599e-06	-5.23088e-06	4.7497e-06
	z.30	2.52799e-06	1.37896e-06	-5.91427e-07	5.64741e-06
	z.31	-4.27761e-06	5.23445e-06	-1.61188e-05	7.56354e-06
	z.32	1.00426e-06	1.61297e-06	-2.64454e-06	4.65307e-06
	z.33	7.06033e-06	5.65689e-06	-5.73645e-06	1.98571e-05
	z.34	-1.1439e-05	4.89193e-06	-2.25053e-05	-3.72684e-07
	z.35	1.28869e-05	6.94194e-06	-2.81683e-06	2.85907e-05
	z.36	-5.08104e-06	4.65266e-06	-1.56061e-05	5.44402e-06
	z.37	2.34065e-06	2.80238e-06	-3.99878e-06	8.68008e-06
	z.38	2.94089e-06	8.87533e-06	-1.71365e-05	2.30183e-05
	z.39	-2.00634e-07	3.43306e-06	-7.96675e-06	7.56548e-06
	z.40	7.72178e-08	1.68843e-06	-3.74228e-06	3.89672e-06
	z.41	-1.7439e-06	1.65232e-06	-5.48171e-06	1.99391e-06
	z.42	1.68317e-06	1.95256e-06	-2.73382e-06	6.10016e-06
	z.43	3.37157e-06	2.54215e-06	-2.37918e-06	9.12232e-06
	z.44	1.58971e-06	4.01664e-06	-7.49656e-06	1.0676e-05
	z.45	8.9349e-06	5.79082e-06	-4.16485e-06	2.20346e-05
	z.46	6.32489e-06	9.50081e-06	-1.51674e-05	2.78172e-05
	z.47	-9.53852e-06	1.27034e-05	-3.82757e-05	1.91986e-05
	z.48	3.50872e-06	1.27201e-06	6.31227e-07	6.38621e-06
	z.49	1.15168e-07	1.95898e-07	-3.27985e-07	5.58321e-07
	z.50	1.2056e-05	5.27881e-06	1.14533e-07	2.39975e-05
	z.51	1.38975e-06	9.52297e-07	-7.64496e-07	3.54399e-06
	z.52	2.53308e-06	2.01869e-06	-2.03352e-06	7.09968e-06
	z.53	6.57794e-06	2.62198e-06	6.46616e-07	1.25093e-05
	z.54	-7.9844e-08	8.85873e-07	-2.08383e-06	1.92414e-06
	z.55	-4.23788e-06	5.45142e-06	-1.65699e-05	8.09409e-06
	z.56	7.86856e-08	2.2155e-07	-4.22495e-07	5.79866e-07
	z.57	-5.3627e-06	8.83446e-06	-2.53476e-05	1.46222e-05
	z.58	1.54857e-06	4.73556e-06	-9.164e-06	1.22611e-05
	z.59	7.73424e-07	1.02105e-06	-1.53634e-06	3.08319e-06
	z.60	2.46379e-06	2.37393e-06	-2.90641e-06	7.83399e-06
	z.61	-1.82627e-06	4.00842e-06	-1.0894e-05	7.24142e-06
	z.62	2.3564e-06	6.04963e-07	9.8788e-07	3.72492e-06
	z.63	-4.58719e-06	1.92673e-06	-8.94576e-06	-2.28627e-07
	z.64	-3.27744e-06	4.63537e-06	-1.37634e-05	7.20849e-06
	z.65	9.49569e-08	6.23234e-07	-1.3149e-06	1.50481e-06
	z.66	6.74053e-06	7.3123e-06	-9.80103e-06	2.32821e-05
	z.67	3.14552e-06	1.53236e-06	-3.20919e-07	6.61197e-06
	z.68	6.42327e-06	2.07083e-06	1.73872e-06	1.11078e-05
	z.69	-3.76533e-06	1.69372e-06	-7.59679e-06	6.6133e-08
	z.70	-1.10923e-06	1.01027e-06	-3.39461e-06	1.17616e-06
	z.71	-1.23835e-06	7.61942e-06	-1.84747e-05	1.5998e-05
	z.72	7.08169e-06	7.85804e-06	-1.06944e-05	2.48578e-05
	z.73	5.12494e-06	6.24923e-06	-9.0118e-06	1.92617e-05
	z.74	4.90477e-06	2.6457e-06	-1.08023e-06	1.08898e-05
	z.75	-4.14784e-07	7.56281e-07	-2.12561e-06	1.29604e-06
	z.76	4.12967e-06	2.56565e-06	-1.67422e-06	9.93356e-06
	z.77	-6.45202e-07	5.41146e-07	-1.86936e-06	5.78954e-07
	z.78	8.04808e-07	5.89497e-06	-1.25305e-05	1.41402e-05
	z.79	-3.56618e-06	7.32259e-06	-2.0131e-05	1.29987e-05
	z.80	-1.11855e-06	5.79969e-06	-1.42384e-05	1.20013e-05
	z.81	-4.9376e-06	5.34459e-06	-1.70279e-05	7.1527e-06
	z.82	-5.76744e-06	6.89622e-06	-2.13678e-05	9.83289e-06
	z.83	-1.63554e-06	1.77589e-06	-5.65289e-06	2.3818e-06
	z.84	3.44206e-07	4.23008e-07	-6.12705e-07	1.30112e-06
	z.85	-3.93082e-06	1.68501e-06	-7.74258e-06	-1.19062e-07
	z.86	-3.55082e-06	3.29195e-06	-1.09977e-05	3.89609e-06
	z.87	-7.09714e-06	5.84245e-06	-2.03137e-05	6.1194e-06
	z.88	-9.87586e-08	2.67624e-06	-6.15283e-06	5.95531e-06
	z.89	-5.75891e-08	3.05899e-07	-7.4958e-07	6.34402e-07
	z.90	6.22238e-06	4.37524e-06	-3.67511e-06	1.61199e-05
	z.91	-1.43795e-05	1.15673e-05	-4.05466e-05	1.17876e-05
	z.92	-1.96718e-06	4.09009e-06	-1.12196e-05	7.28524e-06
	z.93	-3.30351e-06	1.87754e-06	-7.5508e-06	9.43772e-07
	z.94	-2.0101e-06	3.82168e-06	-1.06553e-05	6.63514e-06
	z.95	1.69677e-06	6.29315e-06	-1.25393e-05	1.59329e-05
	z.96	3.02461e-06	1.60913e-06	-6.15501e-07	6.66472e-06
	z.97	-1.36979e-06	1.16009e-06	-3.99409e-06	1.25451e-06
	z.98	-3.80364e-07	2.57269e-07	-9.62348e-07	2.01619e-07
	z.99	-7.4323e-06	6.79549e-06	-2.28048e-05	7.94017e-06
	z.100	1.04051e-05	5.68286e-06	-2.45045e-06	2.32606e-05
	z.101	-3.37458e-06	1.74653e-06	-7.32549e-06	5.76341e-07
	z.102	4.198e-07	1.68012e-06	-3.38088e-06	4.22048e-06
	z.103	1.75092e-07	1.16501e-06	-2.46035e-06	2.81053e-06
[truncated: 4,476 more rows]
[truncated: 150 more columns]
